# Supplementary material for: Conservation of structure and dynamic behavior in triazine macrocycles with opportunities for subtle control of hinge motion
Source: Royal Society of Chemistry journal article supplement (doi:10.1039/d4ob01751j), 2024-12-16
Supplement: d4ob01751j1.pdf [file d4ob01751j1.pdf]

## Supporting Information

### Conservation of Structure and Dynamic Behavior in Triazine Macrocycles:

#### Opportunities for Subtle Control of Hinge Motion

Casey J. Patterson-Gardner,<sup>a</sup> Hongjun Pan,<sup>b</sup> Benjamin G. Janesko,<sup>a</sup> Eric E. Simanek<sup>a,\*</sup>

<sup>a</sup>*Department of Chemistry & Biochemistry, Texas Christian University, Fort Worth, TX, 76129 USA*

<sup>b</sup>*Department of Chemistry, University of North Texas, Denton, TX, 76203, USA*

### Table of Contents

#### General Experimental Details

---

|                                                                                                      |     |
|------------------------------------------------------------------------------------------------------|-----|
| NMR Spectroscopy.                                                                                    | S-5 |
| Modeling NMR Spectra.                                                                                | S-5 |
| Determination of the Temperature of Coalescence, $T_c$ , and Error.                                  | S-5 |
| Determination of Chemical Shift Difference, $\Delta\nu$ , at $T_c$ .                                 | S-5 |
| Determination of the barrier to hinging, $\Delta G^\ddagger$ , from $\Delta\nu$ and $T_c$ .          | S-5 |
| Determination of the Thermodynamics of the barrier to hinging from $\ln(k)$ vs $1/T$ .               | S-6 |
| Determination of the Thermodynamics of the barrier to hinging from the plot of $\ln(k/T)$ vs $1/T$ . | S-6 |
| General Computational Details.                                                                       | S-6 |

#### Computational Structures and Energies

---

|                                                                                                  |     |
|--------------------------------------------------------------------------------------------------|-----|
| <b>Table S1.</b> Computed M06-2x Free Energies of Potential Hinging Intermediates.               | S-7 |
| <b>Table S2.</b> Macrocycle SMILES Strings and AlogP Values.                                     |     |
| <b>Table S3.</b> Gaussian M06-2x Optimized from CREST Potential Hinging Intermediate Structures. | S-8 |

#### Variable-Temperature NMR and Analysis

---

|                                                                                                                     |      |
|---------------------------------------------------------------------------------------------------------------------|------|
| <b>Figure S1.</b> Stacked $^1\text{H}$ VT-NMR Spectra of $\mathbf{G}^{\text{NNMe}}$ .                               | S-9  |
| <b>Figure S2.</b> Annotated Stacked $^1\text{H}$ VT-NMR Spectra of $\mathbf{G}^{\text{NNMe}}$ .                     | S-10 |
| <b>Figure S3.</b> Chemical Shift Dependence on Temperature for $\mathbf{G}^{\text{NNMe}}$ .                         | S-11 |
| <b>Figure S4.</b> $\log_{10}$ of the Difference in Chemical Shift with Temperature for $\mathbf{G}^{\text{NNMe}}$ . | S-11 |
| <b>Table S4.</b> Chemical Shift and $\Delta\nu$ dependence on temperature for $\mathbf{G}^{\text{NNMe}}$ .          | S-12 |
| <b>Table S5.</b> Relevant Variables for the Determination of $\Delta G^\ddagger$ for $\mathbf{G}^{\text{NNMe}}$ .   | S-12 |
| <b>Figure S5.</b> DNMR Traces for $\alpha$ and the respective fit for $\mathbf{G}^{\text{NNMe}}$ .                  | S-13 |
| <b>Figure S6.</b> Thermodynamics derived from DNMR for $\mathbf{G}^{\text{NNMe}}$ .                                 | S-14 |
| <b>Figure S7.</b> Stacked $^1\text{H}$ VT-NMR Spectra of $\mathbf{G}^{\text{NNEt}}$ .                               | S-15 |

|                                                                                                                           |      |
|---------------------------------------------------------------------------------------------------------------------------|------|
| <b>Figure S8.</b> Annotated Stacked $^1\text{H}$ VT-NMR Spectra of $\text{G}^{\text{NNEt}}$ .                             | S-16 |
| <b>Figure S9.</b> Chemical Shift Dependence on Temperature for $\text{G}^{\text{NNEt}}$ .                                 | S-17 |
| <b>Figure S10.</b> $\text{Log}_{10}$ of the Difference in Chemical Shift with Temperature for $\text{G}^{\text{NNEt}}$ .  | S-17 |
| <b>Table S6.</b> Chemical Shift and $\Delta\nu$ dependence on temperature for $\text{G}^{\text{NNEt}}$ .                  | S-18 |
| <b>Table S7.</b> Relevant Variables for the Determination of $\Delta\text{G}^\ddagger$ for $\text{G}^{\text{NNEt}}$ .     | S-18 |
| <b>Figure S11.</b> DNMR Traces for $\alpha$ and the respective fit for $\text{G}^{\text{NNEt}}$ .                         | S-19 |
| <b>Figure S12.</b> Thermodynamics derived from DNMR for the $\alpha$ resonance of $\text{G}^{\text{NNEt}}$ .              | S-20 |
| <b>Figure S13.</b> DNMR Traces for a and the respective fit for $\text{G}^{\text{NNEt}}$ .                                | S-21 |
| <b>Figure S14.</b> Thermodynamics derived from DNMR for the a resonance of $\text{G}^{\text{NNEt}}$ .                     | S-22 |
| <b>Figure S15.</b> Stacked $^1\text{H}$ VT-NMR Spectra of $\text{G}^{\text{NNiPr}}$ .                                     | S-23 |
| <b>Figure S16.</b> Annotated Stacked $^1\text{H}$ VT-NMR Spectra of $\text{G}^{\text{NNiPr}}$ .                           | S-24 |
| <b>Figure S17.</b> Chemical Shift Dependence on Temperature for $\text{G}^{\text{NNiPr}}$ .                               | S-25 |
| <b>Figure S18.</b> $\text{Log}_{10}$ of the Difference in Chemical Shift with Temperature for $\text{G}^{\text{NNiPr}}$ . | S-25 |
| <b>Table S8.</b> Chemical Shift and $\Delta\nu$ dependence on temperature for $\text{G}^{\text{NNiPr}}$ .                 | S-26 |
| <b>Table S9.</b> Relevant Variables for the Determination of $\Delta\text{G}^\ddagger$ for $\text{G}^{\text{NNiPr}}$ .    | S-26 |
| <b>Figure S19.</b> DNMR Traces for $\alpha$ and the respective fit for $\text{G}^{\text{NNiPr}}$ .                        | S-27 |
| <b>Figure S20.</b> Thermodynamics derived from DNMR for $\text{G}^{\text{NNiPr}}$ .                                       | S-28 |
| <b>Figure S21.</b> Stacked $^1\text{H}$ VT-NMR Spectra of $\text{G}^{\text{NNBn}}$ .                                      | S-29 |
| <b>Figure S22.</b> Annotated Stacked $^1\text{H}$ VT-NMR Spectra of $\text{G}^{\text{NNBn}}$ .                            | S-30 |
| <b>Figure S23.</b> Chemical Shift Dependence on Temperature for $\text{G}^{\text{NNBn}}$ .                                | S-31 |
| <b>Figure S24.</b> $\text{Log}_{10}$ of the Difference in Chemical Shift with Temperature for $\text{G}^{\text{NNBn}}$ .  | S-31 |
| <b>Table S10.</b> Chemical Shift and $\Delta\nu$ dependence on temperature for $\text{G}^{\text{NNBn}}$ .                 | S-32 |
| <b>Table S11.</b> Relevant Variables for the Determination of $\Delta\text{G}^\ddagger$ for $\text{G}^{\text{NNBn}}$ .    | S-32 |
| <b>Figure S25.</b> DNMR Traces for $\alpha$ and the respective fit for $\text{G}^{\text{NNBn}}$ .                         | S-33 |
| <b>Figure S26.</b> Thermodynamics derived from DNMR for the $\alpha$ resonance of $\text{G}^{\text{NNBn}}$ .              | S-34 |
| <b>Figure S27.</b> DNMR Traces for a and the respective fit for $\text{G}^{\text{NNBn}}$ .                                | S-35 |
| <b>Figure S28.</b> Thermodynamics derived from DNMR for the a resonance of $\text{G}^{\text{NNBn}}$ .                     | S-36 |
| <b>Figure S29.</b> Stacked $^1\text{H}$ VT-NMR Spectra of $\text{G}^{\text{NNHx}}$ .                                      | S-37 |
| <b>Figure S30.</b> Annotated Stacked $^1\text{H}$ VT-NMR Spectra of $\text{G}^{\text{NNHx}}$ .                            | S-38 |
| <b>Figure S31.</b> Chemical Shift Dependence on Temperature for $\text{G}^{\text{NNHx}}$ .                                | S-39 |
| <b>Figure S32.</b> $\text{Log}_{10}$ of the Difference in Chemical Shift with Temperature for $\text{G}^{\text{NNHx}}$ .  | S-39 |
| <b>Table S12.</b> Chemical Shift and $\Delta\nu$ dependence on temperature for $\text{G}^{\text{NNHx}}$ .                 | S-40 |
| <b>Table S13.</b> Relevant Variables for the Determination of $\Delta\text{G}^\ddagger$ for $\text{G}^{\text{NNHx}}$ .    | S-40 |
| <b>Figure S33.</b> DNMR Traces for $\alpha$ and the respective fit for $\text{G}^{\text{NNHx}}$ .                         | S-41 |
| <b>Figure S34.</b> Thermodynamics derived from DNMR for the $\alpha$ resonance of $\text{G}^{\text{NNHx}}$ .              | S-42 |
| <b>Figure S35.</b> DNMR Traces for a and the respective fit for $\text{G}^{\text{NNHx}}$ .                                | S-43 |
| <b>Figure S36.</b> Thermodynamics derived from DNMR for the a resonance of $\text{G}^{\text{NNHx}}$ .                     | S-44 |

### $^1\text{H}$ NMR Spectra of Macrocycles

|                                                                                                |      |
|------------------------------------------------------------------------------------------------|------|
| <b>Figure S37.</b> The 400 MHz $^1\text{H}$ NMR Spectrum of $\text{G}^{\text{NNMe}}$ in DMSO.  | S-45 |
| <b>Figure S38.</b> The 400 MHz $^1\text{H}$ NMR Spectrum of $\text{G}^{\text{NNEt}}$ in DMSO.  | S-46 |
| <b>Figure S39.</b> The 400 MHz $^1\text{H}$ NMR Spectrum of $\text{G}^{\text{NNiPr}}$ in DMSO. | S-47 |

|                                                                                               |             |
|-----------------------------------------------------------------------------------------------|-------------|
| <b>Figure S40.</b> The 400 MHz $^1\text{H}$ NMR Spectrum of $\text{G}^{\text{NNBn}}$ in DMSO. | <b>S-48</b> |
| <b>Figure S41.</b> The 400 MHz $^1\text{H}$ NMR Spectrum of $\text{G}^{\text{NNHx}}$ in DMSO. | <b>S-49</b> |

### **$^{13}\text{C}$ NMR Spectra of Macrocycles**

---

|                                                                                                   |             |
|---------------------------------------------------------------------------------------------------|-------------|
| <b>Figure S42.</b> The 100 MHz $^{13}\text{C}$ NMR Spectrum of $\text{G}^{\text{NNMe}}$ in DMSO.  | <b>S-50</b> |
| <b>Figure S43.</b> The 100 MHz $^{13}\text{C}$ NMR Spectrum of $\text{G}^{\text{NNEt}}$ in DMSO.  | <b>S-51</b> |
| <b>Figure S44.</b> The 100 MHz $^{13}\text{C}$ NMR Spectrum of $\text{G}^{\text{NNiPr}}$ in DMSO. | <b>S-52</b> |
| <b>Figure S45.</b> The 100 MHz $^{13}\text{C}$ NMR Spectrum of $\text{G}^{\text{NNBn}}$ in DMSO.  | <b>S-53</b> |
| <b>Figure S46.</b> The 100 MHz $^{13}\text{C}$ NMR Spectrum of $\text{G}^{\text{NNHx}}$ in DMSO.  | <b>S-54</b> |

### **2D rOesy and COSY NMR Spectra of Macrocycles**

---

|                                                                                                  |             |
|--------------------------------------------------------------------------------------------------|-------------|
| <b>Figure S47.</b> The 400 MHz rOesy and COSY NMR Spectrum of $\text{G}^{\text{NNMe}}$ in DMSO.  | <b>S-55</b> |
| <b>Figure S48.</b> The 400 MHz rOesy and COSY NMR Spectrum of $\text{G}^{\text{NNEt}}$ in DMSO.  | <b>S-56</b> |
| <b>Figure S49.</b> The 400 MHz rOesy and COSY NMR Spectrum of $\text{G}^{\text{NNiPr}}$ in DMSO. | <b>S-57</b> |
| <b>Figure S50.</b> The 400 MHz rOesy and COSY NMR Spectrum of $\text{G}^{\text{NNBn}}$ in DMSO.  | <b>S-58</b> |
| <b>Figure S51.</b> The 400 MHz rOesy and COSY NMR Spectrum of $\text{G}^{\text{NNHx}}$ in DMSO.  | <b>S-59</b> |

### **Mass Spectra of Macrocycles**

---

|                                                              |             |
|--------------------------------------------------------------|-------------|
| <b>Figure S52.</b> HRMS (ESI) of $\text{G}^{\text{NNMe}}$ .  | <b>S-60</b> |
| <b>Figure S53.</b> HRMS (ESI) of $\text{G}^{\text{NNEt}}$ .  | <b>S-61</b> |
| <b>Figure S54.</b> HRMS (ESI) of $\text{G}^{\text{NNiPr}}$ . | <b>S-62</b> |
| <b>Figure S55.</b> HRMS (ESI) of $\text{G}^{\text{NNBn}}$ .  | <b>S-63</b> |
| <b>Figure S56.</b> HRMS (ESI) of $\text{G}^{\text{NNHx}}$ .  | <b>S-64</b> |

### **General Chemistry**

---

|                           |             |
|---------------------------|-------------|
| General Chemistry Details | <b>S-65</b> |
|---------------------------|-------------|

### **Synthetic Details**

---

|                         |             |
|-------------------------|-------------|
| Synthesis of Hydrazones | <b>S-66</b> |
| Synthesis of Esters     | <b>S-75</b> |
| Synthesis of Monomers   | <b>S-89</b> |

### **Characterization of Hydrazone Intermediates**

---

|                                                                                                                                                            |             |
|------------------------------------------------------------------------------------------------------------------------------------------------------------|-------------|
| <b>Figure S57.</b> The 400 MHz $^1\text{H}$ and 100 MHz $^{13}\text{C}$ NMR spectra of <b>tert-butyl 2-benzylhydrazonocarboxylate</b> in $\text{CDCl}_3$ . | <b>S-69</b> |
| <b>Figure S58.</b> The 400 MHz $^1\text{H}$ and 100 MHz $^{13}\text{C}$ NMR spectra of <b>tert-butyl 2-hexylhydrazonocarboxylate</b> in $\text{CDCl}_3$ .  | <b>S-70</b> |
| <b>Figure S59.</b> The 400 MHz $^1\text{H}$ and 100 MHz $^{13}\text{C}$ NMR spectra of <b>tert-butyl 2-benzylhydrazinecarboxylate</b> in $\text{CDCl}_3$ . | <b>S-71</b> |
| <b>Figure S60.</b> The 400 MHz $^1\text{H}$ and 100 MHz $^{13}\text{C}$ NMR spectra of <b>tert-butyl 2-benzylhydrazinecarboxylate</b> in $\text{CDCl}_3$ . | <b>S-72</b> |
| <b>Figure S61.</b> HRMS (ESI) of <b>tert-butyl 2-hexylhydrazonocarboxylate</b> .                                                                           | <b>S-73</b> |

|                                                                                  |             |
|----------------------------------------------------------------------------------|-------------|
| <b>Figure S62.</b> HRMS (ESI) of <b>tert-butyl 2-hexylhydrazinecarboxylate.</b>  | <b>S-73</b> |
| <b>Figure S63.</b> HRMS (ESI) of <b>tert-butyl 2-benzylhydrazinecarboxylate.</b> | <b>S-73</b> |
| <b>Figure S64.</b> HRMS (ESI) of <b>tert-butyl 2-benzylhydrazoncarboxylate.</b>  | <b>S-74</b> |

#### **Characterization of Ester Intermediates**

---

|                                                                                                                                |             |
|--------------------------------------------------------------------------------------------------------------------------------|-------------|
| <b>Figure S65.</b> The 400 MHz $^1\text{H}$ and 100 MHz $^{13}\text{C}$ NMR spectra of <b>G<sup>NNMe</sup>-Ester</b> in DMSO.  | <b>S-79</b> |
| <b>Figure S66.</b> The 400 MHz $^1\text{H}$ and 100 MHz $^{13}\text{C}$ NMR spectra of <b>G<sup>NNEt</sup>-Ester</b> in DMSO.  | <b>S-80</b> |
| <b>Figure S67.</b> The 400 MHz $^1\text{H}$ and 100 MHz $^{13}\text{C}$ NMR spectra of <b>G<sup>NNiPr</sup>-Ester</b> in DMSO. | <b>S-81</b> |
| <b>Figure S68.</b> The 400 MHz $^1\text{H}$ and 100 MHz $^{13}\text{C}$ NMR spectra of <b>G<sup>NNBn</sup>-Ester</b> in DMSO.  | <b>S-82</b> |
| <b>Figure S69.</b> The 400 MHz $^1\text{H}$ and 100 MHz $^{13}\text{C}$ NMR spectra of <b>G<sup>NNHx</sup>-Ester</b> in DMSO.  | <b>S-83</b> |
| <b>Figure S70.</b> HRMS (ESI) of <b>G<sup>NNMe</sup>-Ester.</b>                                                                | <b>S-84</b> |
| <b>Figure S71.</b> HRMS (ESI) of <b>G<sup>NNEt</sup>-Ester.</b>                                                                | <b>S-85</b> |
| <b>Figure S72.</b> HRMS (ESI) of <b>G<sup>NNiPr</sup>-Ester.</b>                                                               | <b>S-86</b> |
| <b>Figure S73.</b> HRMS (ESI) of <b>G<sup>NNBn</sup>-Ester.</b>                                                                | <b>S-87</b> |
| <b>Figure S74.</b> HRMS (ESI) of <b>G<sup>NNHx</sup>-Ester.</b>                                                                | <b>S-88</b> |

#### **Characterization of Monomer Intermediates**

---

|                                                                                                                                  |              |
|----------------------------------------------------------------------------------------------------------------------------------|--------------|
| <b>Figure S75.</b> The 400 MHz $^1\text{H}$ and 100 MHz $^{13}\text{C}$ NMR spectra of <b>G<sup>NNMe</sup>-Monomer</b> in DMSO.  | <b>S-94</b>  |
| <b>Figure S76.</b> The 400 MHz $^1\text{H}$ and 100 MHz $^{13}\text{C}$ NMR spectra of <b>G<sup>NNEt</sup>-Monomer</b> in DMSO.  | <b>S-95</b>  |
| <b>Figure S77.</b> The 400 MHz $^1\text{H}$ and 100 MHz $^{13}\text{C}$ NMR spectra of <b>G<sup>NNiPr</sup>-Monomer</b> in DMSO. | <b>S-96</b>  |
| <b>Figure S78.</b> The 400 MHz $^1\text{H}$ and 100 MHz $^{13}\text{C}$ NMR spectra of <b>G<sup>NNBn</sup>-Monomer</b> in DMSO.  | <b>S-97</b>  |
| <b>Figure S79.</b> The 400 MHz $^1\text{H}$ and 100 MHz $^{13}\text{C}$ NMR spectra of <b>G<sup>NNHx</sup>-Monomer</b> in DMSO.  | <b>S-98</b>  |
| <b>Figure S80.</b> HRMS (ESI) of <b>G<sup>NNMe</sup>-Monomer.</b>                                                                | <b>S-99</b>  |
| <b>Figure S81.</b> HRMS (ESI) of <b>G<sup>NNEt</sup>-Monomer.</b>                                                                | <b>S-100</b> |
| <b>Figure S82.</b> HRMS (ESI) of <b>G<sup>NNiPr</sup>-Monomer.</b>                                                               | <b>S-101</b> |
| <b>Figure S83.</b> HRMS (ESI) of <b>G<sup>NNBn</sup>-Monomer.</b>                                                                | <b>S-102</b> |
| <b>Figure S84.</b> HRMS (ESI) of <b>G<sup>NNHx</sup>-Monomer.</b>                                                                | <b>S-103</b> |

|                   |              |
|-------------------|--------------|
| <b>References</b> | <b>S-104</b> |
|-------------------|--------------|

---

## GENERAL EXPERIMENTAL DETAILS

**NMR Spectroscopy.** Variable-temperature NMR was taken 500 MHz Varian NMR spectrometer at the University of North Texas. All other spectra were taken on a 400 MHz Bruker Avance spectrometer at Texas Christian University. Chemical shifts for  $^1\text{H}$  and  $^{13}\text{C}\{^1\text{H}\}$  spectra were calibrated to their corresponding solvent resonance (i.e., DMSO- $d_6$  with  $\delta = 2.50$  ppm for  $^1\text{H}$  spectra and  $\delta = 39.52$  for  $^{13}\text{C}\{^1\text{H}\}$  spectra,  $\text{CDCl}_3$  with  $\delta = 7.26$  for  $^1\text{H}$  spectra and  $\delta = 77.16$  for  $^{13}\text{C}\{^1\text{H}\}$  spectra, and  $\text{CD}_3\text{OD}$  with  $\delta = 3.31$  for  $^1\text{H}$  and  $\delta = 49.00$  for  $^{13}\text{C}\{^1\text{H}\}$  spectra). Identification of splitting of NMR signals was assigned by the following: s = singlet, d = doublet, t = triplet, q = quartet, bs = broad singlet, m = multiplet (if the center of the multiplet could not be determined, a range for the peak was reported).

The contours of 2D Spectra (COSY and rOesy) were calibrated to the center of their corresponding NMR- $^1\text{H}$  resonances (i.e., the methylene/methyl/methine vinyl to the Ar-hydrazone nitrogen). 2D rOesy spectra underwent a freeze/thaw cycle by freezing the macrocycle in DMSO solution in a dry ice/acetone bath and thawing under vacuum. After evolution of bubbles stopped, the NMR tube was removed from vacuum and backfilled with  $\text{N}_2$ . This cycle was repeated until evolution of gas was no longer noticed. Variable temperature  $^1\text{H}$  NMR was taken with temperatures between  $-50^\circ\text{C}$  and  $50^\circ\text{C}$ .

**Modeling NMR Spectra.** Dynamic NMR (DNMR) was performed using TopSpin 3.7.0 using the "Fit Dynamic NMR Models" command. The rate constant,  $k$ , for each spectrum was determined by optimizing the  $k$ , line broadening (LB), the J-value when necessary, intensity, and chemical shift of the simulated peaks until the highest fit was achieved. The original spectra is shown in black and simulated spectra are shown in green or magenta.

**Determination of the Temperature of Coalescence,  $T_c$ , and Error.** The temperature of coalescence was determined from the halfway point between the first observed coalesced point and the last observed decoalesced point. e.g., with the  $\alpha$  proton of  $\text{G}^{\text{NMe}}$ , the last decoalesced temperature was 263K, and the first coalesced temperature was 268K, so  $T_c$  was taken to be 265.5K (see **Figure S2** for an example of a coalescence plot). Consequently, the upper and lower temperature bounds were taken and used to find the uncertainty of  $\Delta G^\ddagger$  for these bounds. For example, the reported  $\Delta G^\ddagger$  for the  $\alpha$  proton of  $\text{G}^{\text{NMe}}$  uses  $T_c$  at 265.5K, and the uncertainty is derived from the deviation from  $\Delta G^\ddagger@265.5\text{K}$  with  $\Delta G^\ddagger@268\text{K}$  as an upper bound and  $\Delta G^\ddagger@263\text{K}$  as a lower bound.

**Determination of chemical shift difference,  $\Delta\nu$ , at  $T_c$ .** The difference in chemical shift at  $T_c$  was determined by a plot between  $\log(\Delta\nu)$  and its respective temperature. The linear portion of the plot was used to generate a linear regression (see **Figure S4** for an example). The  $T_c$  was used with the linear equation to give  $\log(\Delta\nu)$  at  $T_c$ , which then allows for determination the  $\Delta\nu$  at  $T_c$ .

**Determination of the barrier to hinging,  $\Delta G^\ddagger$ , from  $\Delta\nu$  and  $T_c$ .** The barriers to hinging were obtained from the Eyring-Polanyi equation where  $\kappa$  is the transmission coefficient (assumed to be 1),  $h$  is Planck's constant,  $k_{\text{exch}}$  is the exchange rate,  $k_B$  is the Boltzmann constant, and  $R$  is the ideal gas constant. The exchange rate is acquired from equation 2 where  $\Delta\nu$  is in Hz.

$$\Delta G = -RT_c \ln \left( \frac{\kappa h k_{\text{exch}}}{k_B T_c} \right) \quad (\text{equation 1})$$

$$k_{\text{exch}} = \frac{\pi(\Delta\nu)}{\sqrt{2}} \approx 2.22\Delta\nu \quad (\text{equation 2})$$

**Determination of the thermodynamics of the barrier to hinging,  $\Delta H^\ddagger$ ,  $\Delta S^\ddagger$ , and  $\Delta G^\ddagger$  from the plot of  $\ln(k)$  vs  $1/T$ .** The  $\Delta G^\ddagger$  was determined from the equation 3 where  $a$  is constant 0.004575 kcal/mol,  $T$  is desired temperature in K (in this case,  $T = T_c$ ),  $T_c$  is the temperature of coalescence (previously determined), and  $\Delta\nu$  is the chemical shift difference at the desired temperature in 1/s (here,  $\Delta\nu = \Delta\nu$  at  $T_c$ ).

$$\Delta G = aT \left( 9.972 + \log \left( \frac{T_c}{\Delta\nu} \right) \right) \quad (\text{equation 3})$$

Enthalpy,  $\Delta H^\ddagger$ , is obtained from the slope of the plot of  $\ln(k)$  vs  $1/T$ , with  $k$  being the rate constant determined with DNMR line shape analysis, with equation 4.  $E_a$  is determined by equation 5. where  $R$  is the gas constant 1.987e-3 kcal/mol, and  $T_c$  is the previously determined temperature of coalescence. Entropy,  $\Delta S^\ddagger$ , is yielded from the Gibbs free energy equation, giving equation 6, where  $\Delta G$  and  $\Delta H$  are the previously determined free energy and enthalpy, and  $T_c$  is the previously determined temperature of coalescence.

$$\Delta H = E_a - RT_c, \quad (\text{equation 4})$$

$$E_a = -\text{slope} * R \quad (\text{equation 5})$$

$$\Delta S = -\frac{\Delta G - \Delta H}{T_c} \quad (\text{equation 6})$$

**Determination of the thermodynamics of the barrier to hinging,  $\Delta H^\ddagger$ ,  $\Delta S^\ddagger$ , and  $\Delta G^\ddagger$  from the plot of  $\ln(k/T)$  vs  $1/T$ .** A plot of  $\ln(k/T)$  vs  $1/T$  was generated and a linear regression was performed to yield the slope and intercept values. Enthalpy,  $\Delta H$ , was determined from equation 7. Entropy was determined from equation 8 where  $k_b$  is the Boltzmann constant 8.314 J/Kmol,  $h$  is 6.6e-34 Js, and  $R$  is 1.987e-3 kcal/mol.  $\Delta G$  is thereby determined from the Gibbs free energy equation (Equation 5.).

$$\Delta H = -\text{slope}/R. \quad (\text{equation 7})$$

$$\Delta S = \left( y - \text{intercept} - \ln \left( \frac{k_b}{h} \right) \right) * R \quad (\text{equation 8})$$

**General Computational Details.** The  $G^{\text{NNMe}}$  conformer ensemble was generated using CREST with the keywords --gnf2, --alpb dms0, --chrg 2 on a previously optimized structure in Gaussian. The folded conformer, acute conformer, and canted conformer were identified as possible intermediates from  $G^{\text{NNMe}}$ 's CREST conformer output. The selected conformers were modified in GaussView 6 to match their respective macrocycle (e.g., adding a methyl to  $G^{\text{NNMe}}$  methyl hydrazone to generate  $G^{\text{NNEt}}$ , appending a hexyl chain to  $G^{\text{NNMe}}$  to generate  $G^{\text{NNHx}}$ ) for the folded conformer, acute conformer, and canted conformer for each macrocycle. These structures were then optimized in Gaussian16 and thermochemical values were obtained with the input:

opt freq empiricaldispersion=gd3 scrf=(solvent=dms) scf=xqc def2svp m062x

M06-2x was chosen due to success in other triazine computation.<sup>A</sup> Tight exchange (scf=xqc) was needed for convergence of  $G^{NNBn}$  folded conformation, and so was appended to the other macrocycles and conformers as well. Grimme's dispersion 3 (Ref. B) was invoked due to an otherwise ovalar shape that was obtained from optimization in the absence of dispersion correction. Free energies are reported in **Table S1**. The optimized structures are reported in **Table S3**.

**Table S1.** Computed M06-2x Free Energies of Potential Hinging Intermediates.

|             | $G_{\text{folded}}$<br>(kcal/mol) | $G_{\text{stairstep}}$<br>(kcal/mol) | $\Delta G_{\text{stairstep-folded}}$<br>(kcal/mol) | $G_{\text{acute}}$<br>(kcal/mol) | $\Delta G_{\text{acute-folded}}$<br>(kcal/mol) |
|-------------|-----------------------------------|--------------------------------------|----------------------------------------------------|----------------------------------|------------------------------------------------|
| $G^{NNH}$   | -1133466                          | -1133461                             | 4.617795                                           | -1133460                         | 6.120664                                       |
| $G^{NNMe}$  | -1182707.452                      | -1182700.018                         | 7.433400538                                        | -1182699                         | 8.865362                                       |
| $G^{NNEt}$  | -1231953.806                      | -1231944.561                         | 9.245001699                                        | -1231945                         | 8.520863                                       |
| $G^{NNiPr}$ | -1281189                          | -1281185                             | 4.294631                                           | -1281185                         | 3.715445                                       |
| $G^{NNBn}$  | -1472260.188                      | -1472253.096                         | 7.092038906                                        | -1472254                         | 6.099957                                       |
| $G^{NNHx}$  | -1428925                          | -1428916                             | 9.071811                                           | -1428916                         | 8.688407                                       |

Space filling structures and  $G^{NNiPr}$  ajar figures were generated in UCSF Chimera 1.16. RMSD values were obtained from the Gaussian16 optimized structures using the "match" command on the respective macrocycles. The hydrazone sidechain atoms were removed to minimize error stemming from disorder of the hydrazone chain.

AlogP values for the alkyl hydrazone macrocycles were obtained using RDKit's MolLogP command. The SMILES strings and respective logP values are reported in **Table S2**.

**Table S2.** Macrocycle SMILES Strings and AlogP Values.

|             | Macrocycle SMILES String                                                                                | AlogP   |
|-------------|---------------------------------------------------------------------------------------------------------|---------|
| $G^{NNMe}$  | <chem>n1c(N(C)C)nc(N(C)N=CCCNC(=O)CN3)nc(NCC(=O)NCCC=NN(C)(c2nc(N(C)C)nc3n2))1</chem>                   | -1.4172 |
| $G^{NNEt}$  | <chem>n1c(N(C)C)nc(N(CC)N=CCCNC(=O)CN3)nc(NCC(=O)NCCC=NN(CC)(c2nc(N(C)C)nc3n2))1</chem>                 | -0.6370 |
| $G^{NNiPr}$ | <chem>n1c(N(C)C)nc(N(C(C)C)N=CCCNC(=O)CN3)nc(NCC(=O)NCCC=NN(C(C)C)(c2nc(N(C)C)nc3n2))1</chem>           | 0.1400  |
| $G^{NNBn}$  | <chem>n1c(N(C)C)nc(N(C(c1cccc1))N=CCCNC(=O)CN3)nc(NCC(=O)NCCC=NN(C(c1cccc1))(c2nc(N(C)C)nc3n2))1</chem> | 0.7933  |
| $G^{NNHx}$  | <chem>n1c(N(C)C)nc(N(CCCCC)N=CCCNC(=O)CN3)nc(NCC(=O)NCCC=NN(CCCCC)(c2nc(N(C)C)nc3n2))1</chem>           | 2.4838  |

**Table S3.** Gaussian M06-2x Optimized Potential Hinging Intermediate Structures.

| Macrocycle  | Folded                                                                              | Stairstep                                                                            | Acute                                                                                 |
|-------------|-------------------------------------------------------------------------------------|--------------------------------------------------------------------------------------|---------------------------------------------------------------------------------------|
| $G^{NNH}$   | 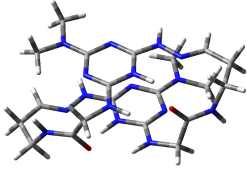   |    |    |
| $G^{NNMe}$  |    |    |    |
| $G^{NNEt}$  |    |    |    |
| $G^{NNiPr}$ |   |   |   |
| $G^{NNBn}$  |  |  |  |
| $G^{NNHx}$  |  |  |  |



**Figure S1.** Stacked  $^1\text{H}$  VT-NMR Spectra of  $\text{G}^{\text{NNMe}}$ . To assess the impact of additional acid, difluoroacetic acid was added to the sample and additional spectra were collected. These spectra are incorporated into this figure at the appropriate temperature and are evident from the DFA resonance at 6.5 ppm.

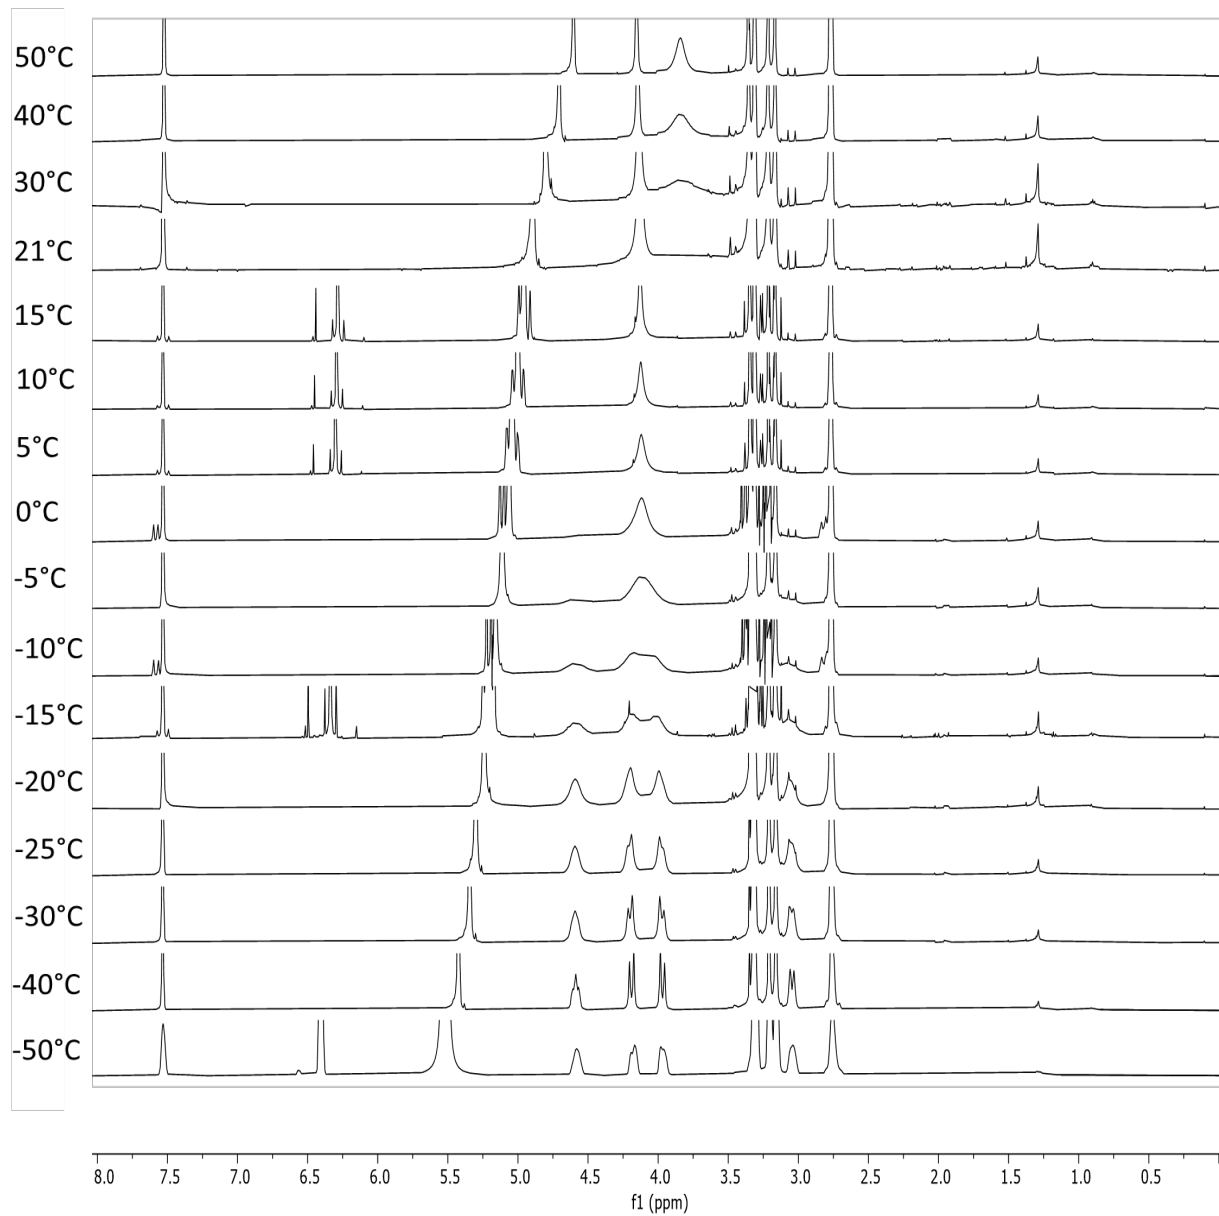

**Figure S2.** Annotated Stacked  $^1\text{H}$  VT-NMR Spectra of  $\text{G}^{\text{NNMe}}$ . The resonances corresponding to  $\alpha$  are highlighted with red with a black border. The resonances corresponding to C are highlighted with blue without a border. The inset highlights the temperatures around coalescence for C, with the resonances denoted by blue squares with a black border. The first spectrum post coalescence is denoted with the  $T_c$  in the respective resonance's color.

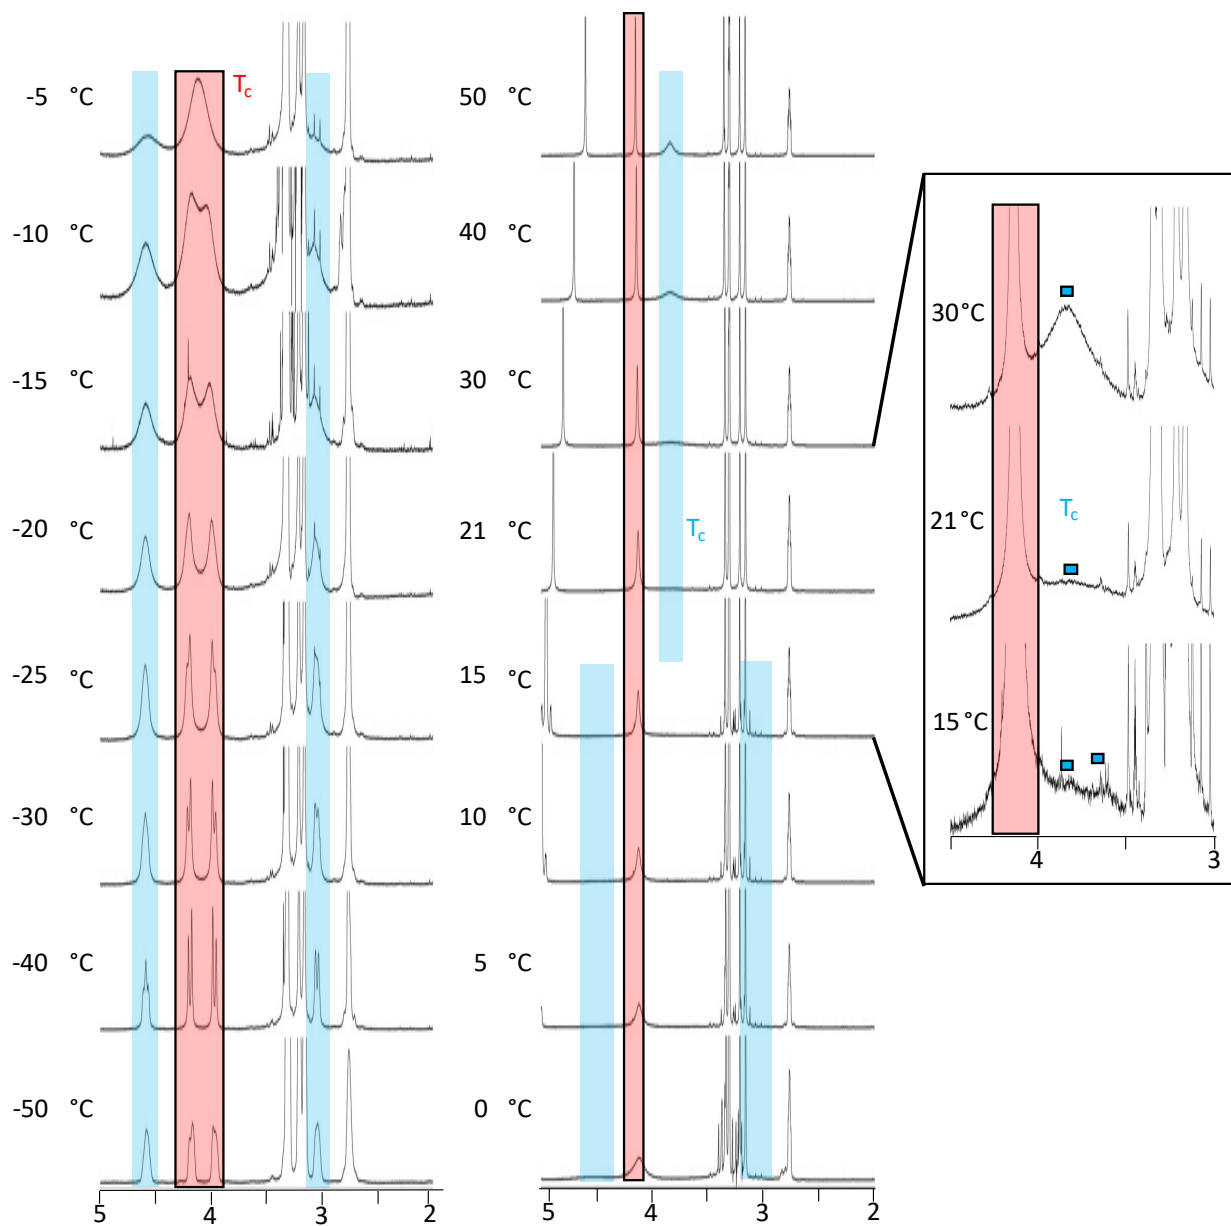

**Figure S3.** Chemical Shift Dependence on Temperature for  $G^{NNMe}$ .

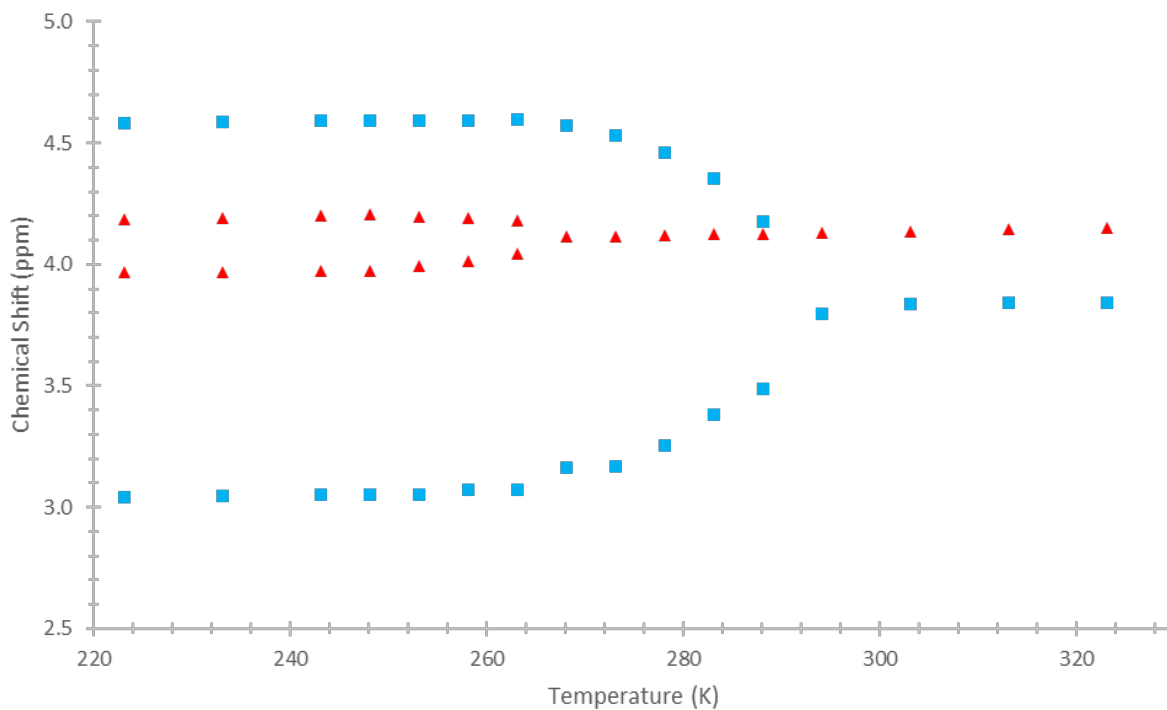

**Figure S4.**  $\log_{10}$  of the Difference in Chemical Shift with Temperature for  $G^{NNMe}$ . Lines are derived from the linear sections of the graph.

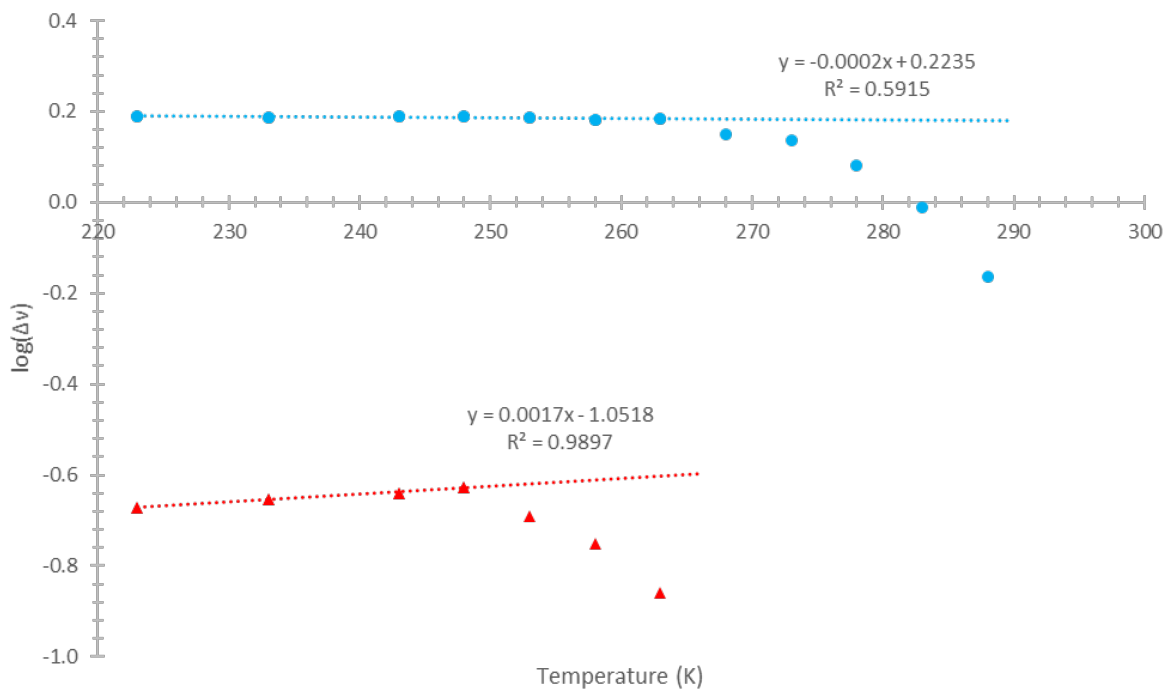

**Table S4.** Chemical shift and  $\Delta\nu$  dependence on temperature for  $G^{NNMe}$ .

| T<br>(K) | $\alpha$                |        |                      |                   | C                       |        |                      |                   |
|----------|-------------------------|--------|----------------------|-------------------|-------------------------|--------|----------------------|-------------------|
|          | Chemical Shift<br>(ppm) |        | $\Delta\nu$<br>(ppm) | $\log(\Delta\nu)$ | Chemical Shift<br>(ppm) |        | $\Delta\nu$<br>(ppm) | $\log(\Delta\nu)$ |
| 323      | 4.1523                  | -      | -                    | -                 | 3.8412                  | -      | -                    | -                 |
| 313      | 4.1440                  | -      | -                    | -                 | 3.8397                  | -      | -                    | -                 |
| 303      | 4.1355                  | -      | -                    | -                 | 3.8351                  | -      | -                    | -                 |
| 294      | 4.1286                  | -      | -                    | -                 | 3.7979                  | -      | -                    | -                 |
| 288      | 4.1273                  | -      | -                    | -                 | 4.1740                  | 3.4870 | 0.6870               | -0.1630           |
| 283      | 4.1236                  | -      | -                    | -                 | 4.3560                  | 3.3833 | 0.9727               | -0.0120           |
| 278      | 4.1204                  | -      | -                    | -                 | 4.4580                  | 3.2542 | 1.2038               | 0.0806            |
| 273      | 4.1181                  | -      | -                    | -                 | 4.5334                  | 3.1678 | 1.3656               | 0.1353            |
| 268      | 4.1151                  | -      | -                    | -                 | 4.5730                  | 3.1646 | 1.4084               | 0.1487            |
| 263      | 4.1809                  | 4.0425 | 0.1384               | -0.8589           | 4.5961                  | 3.0708 | 1.5253               | 0.1834            |
| 258      | 4.1920                  | 4.0150 | 0.1770               | -0.7520           | 4.5900                  | 3.0714 | 1.5186               | 0.1814            |
| 253      | 4.1965                  | 3.9931 | 0.2034               | -0.6916           | 4.5906                  | 3.0537 | 1.5369               | 0.1866            |
| 248      | 4.2080                  | 3.9721 | 0.2359               | -0.6273           | 4.5926                  | 3.0509 | 1.5417               | 0.1880            |
| 243      | 4.2015                  | 3.9726 | 0.2289               | -0.6404           | 4.5922                  | 3.0500 | 1.5422               | 0.1881            |
| 233      | 4.1911                  | 3.9693 | 0.2218               | -0.6540           | 4.5873                  | 3.0460 | 1.5413               | 0.1879            |
| 223      | 4.1840                  | 3.9710 | 0.2130               | -0.6716           | 4.5831                  | 3.0394 | 1.5437               | 0.1886            |

**Table S5.** Relevant variables for the determination of  $\Delta G^\ddagger$  for  $G^{NNMe}$ .

|          | $T_c$<br>(K) | $\log(\Delta\nu)$ | $\Delta\nu@T_c$ (ppm) | k<br>(MHz) | $\Delta G^\ddagger$ (kcal/mol) |
|----------|--------------|-------------------|-----------------------|------------|--------------------------------|
| $\alpha$ | 265.5        | -0.5993           | 0.2516                | 279.4      | 12.51                          |
| C        | 291          | 0.1795            | 1.5120                | 1679.0     | 12.73                          |
|          |              |                   |                       | Average    | 12.62                          |

**Figure S5.** DNMR traces for  $\alpha$  and the respective fit for C for  $G^{NNMe}$ . The original spectra are shown in black, while the simulated spectra are shown in green or mauve.

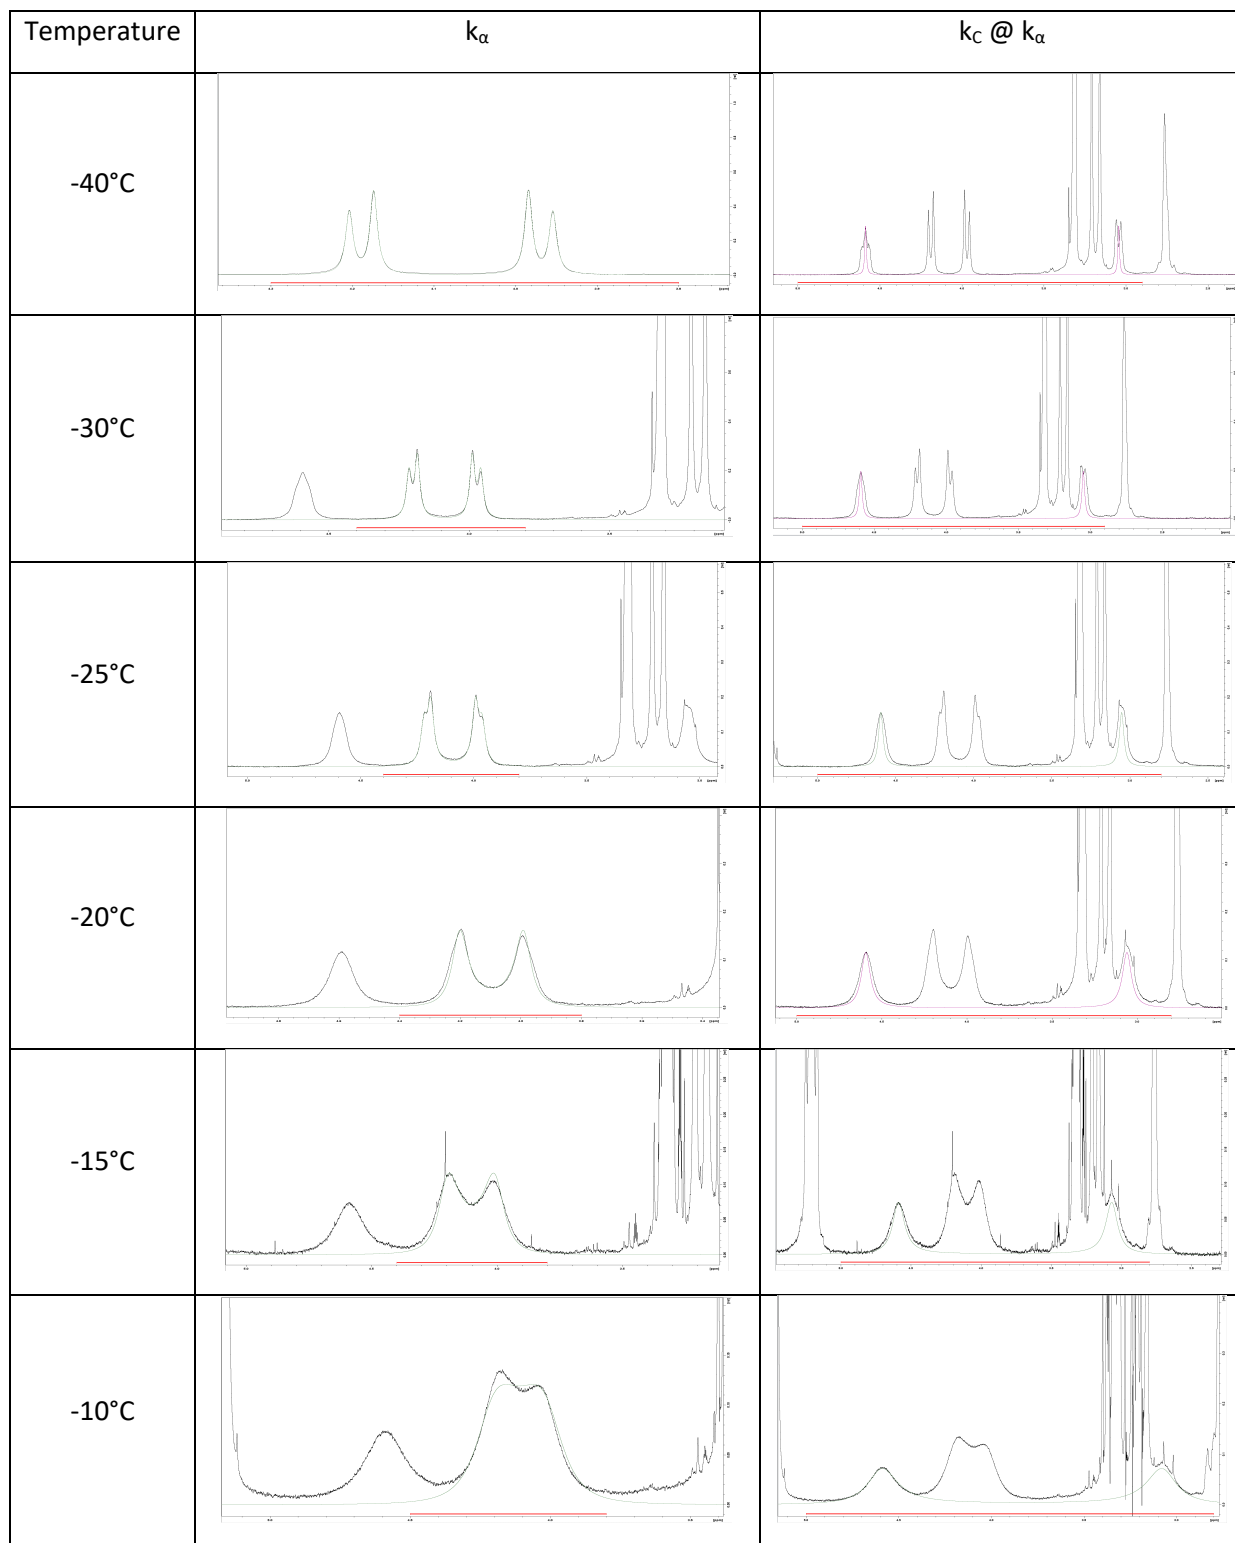

**Figure S6.** Thermodynamics Derived from DNMR for  $G^{NNMe}$ . a) Temperature dependent rate constant for the selected temperatures. b) Enthalpy, entropy, and free energy calculated from the Arrhenius and Eyring plots. c) The Arrhenius plot for  $G^{NNMe}$ . d) The Eyring plot for  $G^{NNMe}$ .

| a) | T (°C) | T (K)  | 1/T     | k        | ln(k)   | ln(k/T) |
|----|--------|--------|---------|----------|---------|---------|
|    | -40    | 233.15 | 0.00429 | 1.0565   | 0.05493 | -5.397  |
|    | -30    | 243.15 | 0.00411 | 3.9579   | 1.376   | -4.118  |
|    | -25    | 248.15 | 0.00403 | 22.5488  | 3.116   | -2.398  |
|    | -20    | 253.15 | 0.00395 | 68.3431  | 4.225   | -1.309  |
|    | -15    | 258.15 | 0.00387 | 127.2810 | 4.846   | -1.001  |
|    | -10    | 263.15 | 0.00380 | 275.7020 | 5.619   | 0.04660 |

| b) | Method         | $\Delta H^\ddagger$ | $\Delta S^\ddagger$ | $\Delta G^\ddagger$ |
|----|----------------|---------------------|---------------------|---------------------|
|    | ln(k) vs 1/T   | 23.32               | 0.041               | 12.51               |
|    | ln(k/T) vs 1/T | 22.84               | 0.040               | 12.31               |

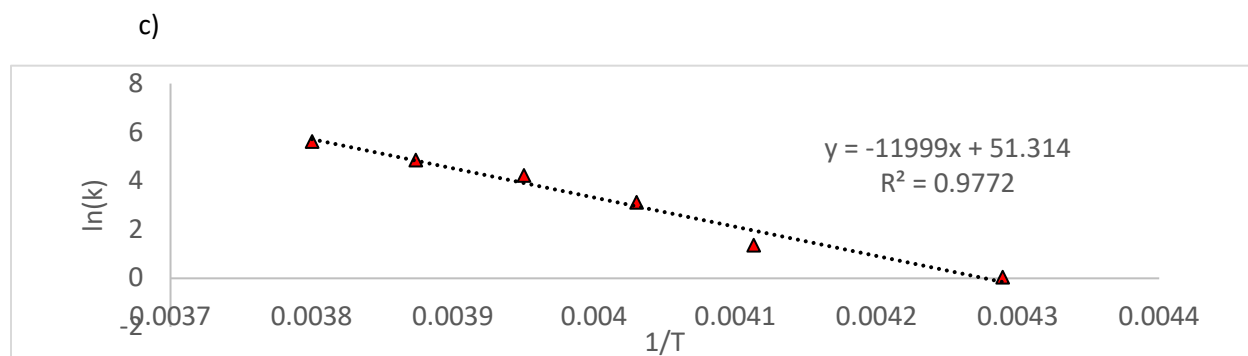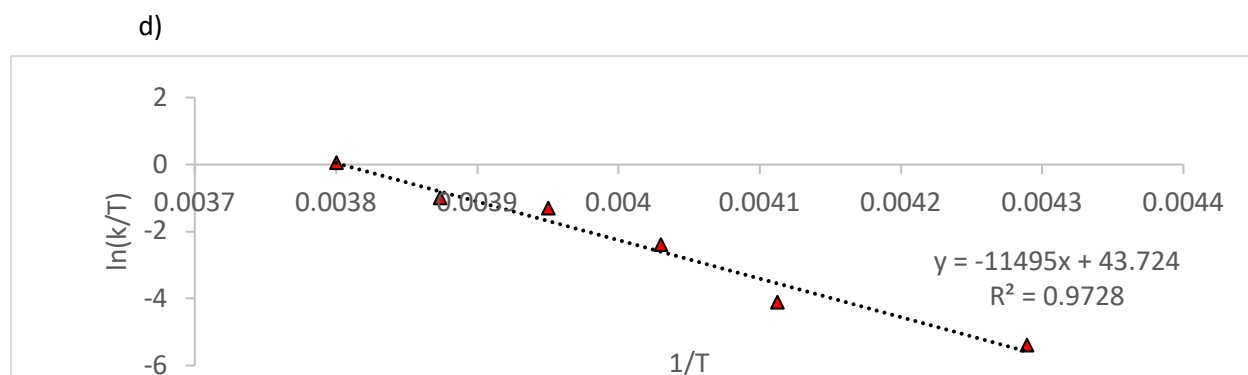

Figure S7. Stacked  $^1\text{H}$  VT-NMR Spectra of  $\text{G}^{\text{NNEt}}$ .

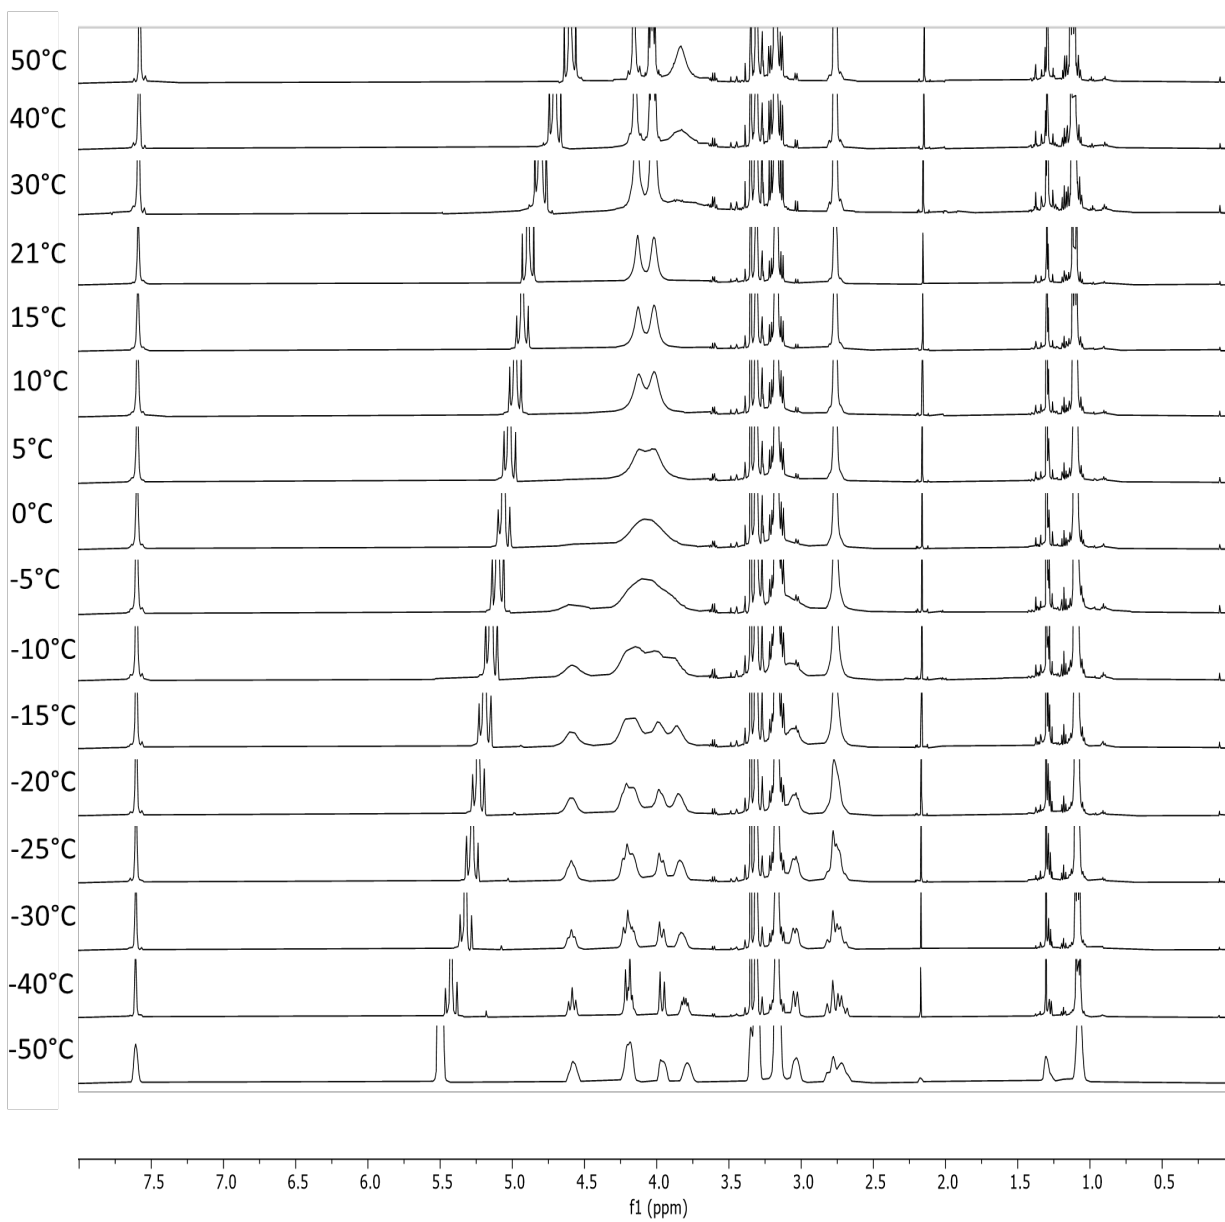

**Figure S8.** Annotated Stacked  $^1\text{H}$  VT-NMR Spectra of  $\text{G}^{\text{NNEt}}$ . The resonances corresponding to  $\alpha$  are highlighted with red with a black border. The resonances corresponding to C are highlighted with blue without a border. The resonances corresponding to a are highlighted with green with a dashed border. The inset highlights the temperatures around coalescence for C, with the resonances denoted by blue squares with a black border. The first spectrum post coalescence is denoted with the  $T_c$  in the respective resonance's color.

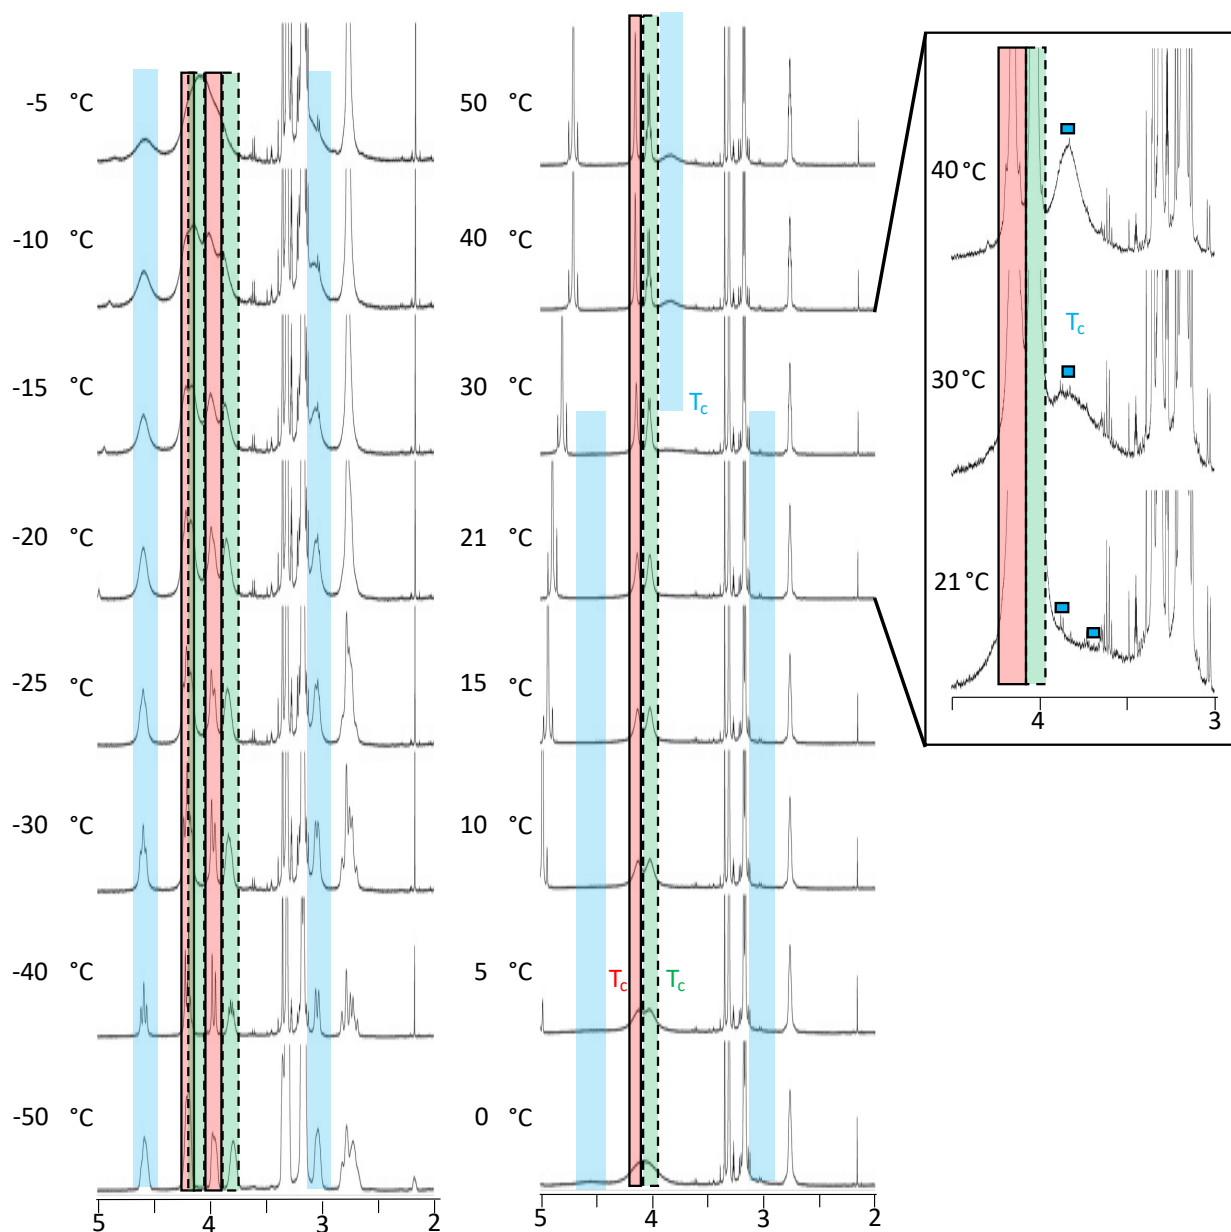



**Figure S9.** Chemical Shift Dependence on Temperature for  $G^{NN\text{Et}}$ .

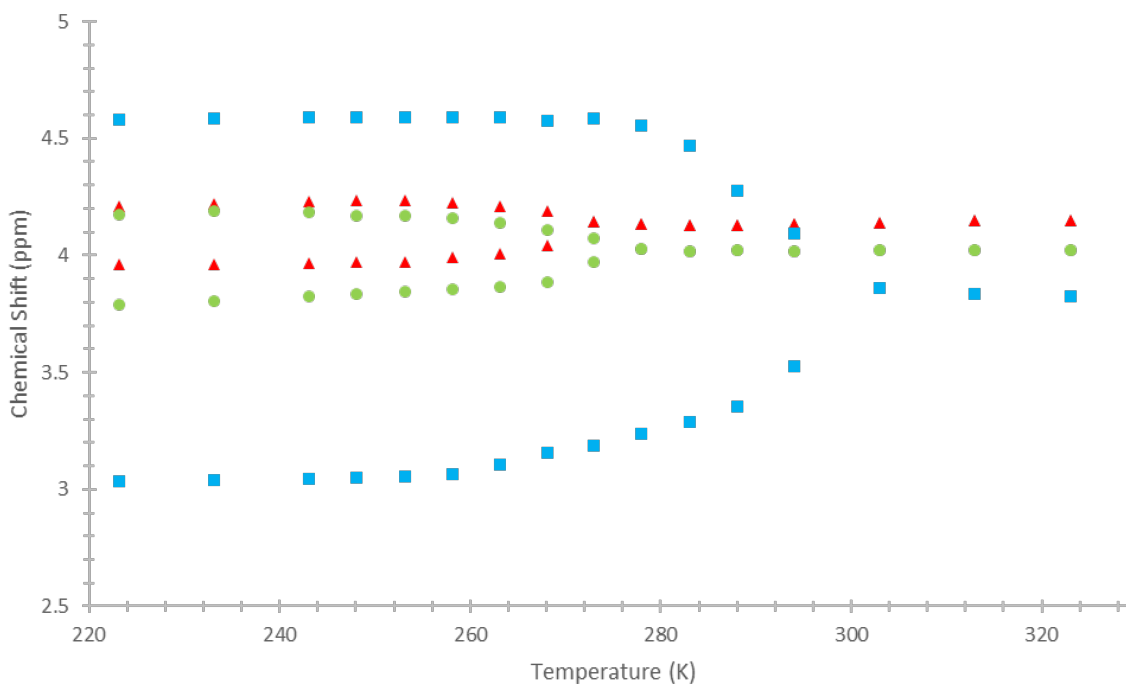

**Figure S10.** Log10 of the Difference in Chemical Shift with Temperature for  $G^{NN\text{Et}}$ . Lines are derived from the linear sections of the graph.

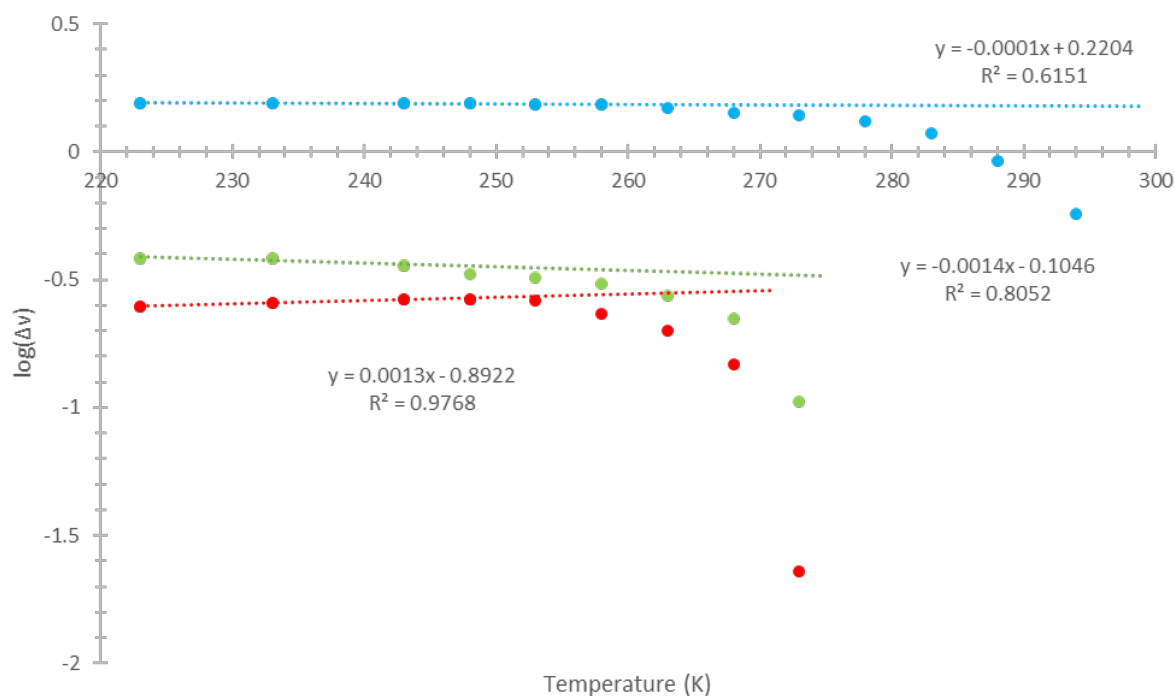

**Table S6.** Chemical Shift and  $\Delta\nu$  Dependence on Temperature for  $G^{NNEt}$ .

| T<br>(K) | $\alpha$                |        |                      |                   | C                       |         |                      |                   | a                       |        |                      |                   |
|----------|-------------------------|--------|----------------------|-------------------|-------------------------|---------|----------------------|-------------------|-------------------------|--------|----------------------|-------------------|
|          | Chemical Shift<br>(ppm) |        | $\Delta\nu$<br>(ppm) | $\log(\Delta\nu)$ | Chemical Shift<br>(ppm) |         | $\Delta\nu$<br>(ppm) | $\log(\Delta\nu)$ | Chemical Shift<br>(ppm) |        | $\Delta\nu$<br>(ppm) | $\log(\Delta\nu)$ |
| 323      | 4.1490                  | 4.1490 | -                    | -                 | 3.8268                  | 3.82680 | -                    | -                 | 4.0214                  | 4.0214 | -                    | -                 |
| 313      | 4.1491                  | 4.1491 | -                    | -                 | 3.8340                  | 3.8340  | -                    | -                 | 4.0215                  | 4.0215 | -                    | -                 |
| 303      | 4.1403                  | 4.1403 | -                    | -                 | 3.8610                  | 3.8610  | -                    | -                 | 4.0235                  | 4.0235 | -                    | -                 |
| 294      | 4.1330                  | 4.1330 | -                    | -                 | 4.0930                  | 3.5240  | 0.5690               | -0.2449           | 4.0197                  | 4.0197 | -                    | -                 |
| 288      | 4.1300                  | 4.1300 | -                    | -                 | 4.2750                  | 3.3519  | 0.9231               | -0.0348           | 4.0210                  | 4.0210 | -                    | -                 |
| 283      | 4.1300                  | 4.1300 | -                    | -                 | 4.4680                  | 3.2887  | 1.1793               | 0.0716            | 4.0184                  | 4.0184 | -                    | -                 |
| 278      | 4.1350                  | 4.1350 | -                    | -                 | 4.5530                  | 3.2390  | 1.3140               | 0.1186            | 4.0250                  | 4.0250 | -                    | -                 |
| 273      | 4.1420                  | 4.1190 | -                    | -                 | 4.5830                  | 3.1868  | 1.3962               | 0.1449            | 4.0750                  | 3.9700 | 0.1050               | -0.9788           |
| 268      | 4.1900                  | 4.0420 | 0.0230               | -1.6383           | 4.5723                  | 3.1554  | 1.4169               | 0.1513            | 4.1090                  | 3.8860 | 0.2230               | -0.6517           |
| 263      | 4.2080                  | 4.0080 | 0.2000               | -0.6990           | 4.5880                  | 3.1051  | 1.4829               | 0.1711            | 4.1380                  | 3.8640 | 0.2740               | -0.5622           |
| 258      | 4.2240                  | 3.9920 | 0.2320               | -0.6345           | 4.5888                  | 3.0624  | 1.5264               | 0.1837            | 4.1600                  | 3.8560 | 0.3040               | -0.5171           |
| 253      | 4.2340                  | 3.9720 | 0.2620               | -0.5817           | 4.5910                  | 3.0528  | 1.5382               | 0.1870            | 4.1690                  | 3.8460 | 0.3230               | -0.4908           |
| 248      | 4.2370                  | 3.9710 | 0.2660               | -0.5751           | 4.5922                  | 3.0494  | 1.5428               | 0.1883            | 4.1680                  | 3.8340 | 0.3340               | -0.4763           |
| 243      | 4.2314                  | 3.9661 | 0.2653               | -0.5763           | 4.5911                  | 3.0446  | 1.5465               | 0.1894            | 4.1864                  | 3.8260 | 0.3604               | -0.4432           |
| 233      | 4.2177                  | 3.9619 | 0.2558               | -0.5921           | 4.5853                  | 3.0397  | 1.5456               | 0.1891            | 4.1879                  | 3.8057 | 0.3822               | -0.4177           |
| 223      | 4.2120                  | 3.9640 | 0.2480               | -0.6056           | 4.5810                  | 3.0340  | 1.5470               | 0.1895            | 4.1730                  | 3.7890 | 0.3840               | -0.4157           |

**Table S7.** Relevant Variables for the Determination of  $\Delta G^\ddagger$  for  $G^{NNEt}$ .

|          | $T_c$<br>(K) | $\log(\Delta\nu)$ | $\Delta\nu@T_c$ (ppm) | k<br>(MHz) | $\Delta G^\ddagger$ (kcal/mol) |
|----------|--------------|-------------------|-----------------------|------------|--------------------------------|
| $\alpha$ | 275.5        | -0.5373           | 0.2902                | 322.3      | 12.92                          |
| C        | 298.5        | 0.1804            | 1.5150                | 1682.6     | 13.07                          |
| a        | 275.5        | -0.4841           | 0.3280                | 364.4      | 12.85                          |
|          |              |                   |                       | Average    | 12.95                          |

**Figure S11.** DNMR Traces for  $\alpha$  and the Respective Fit for C for  $G^{NNEt}$ . The original spectra are shown in black, while the simulated spectra are shown in green or mauve.

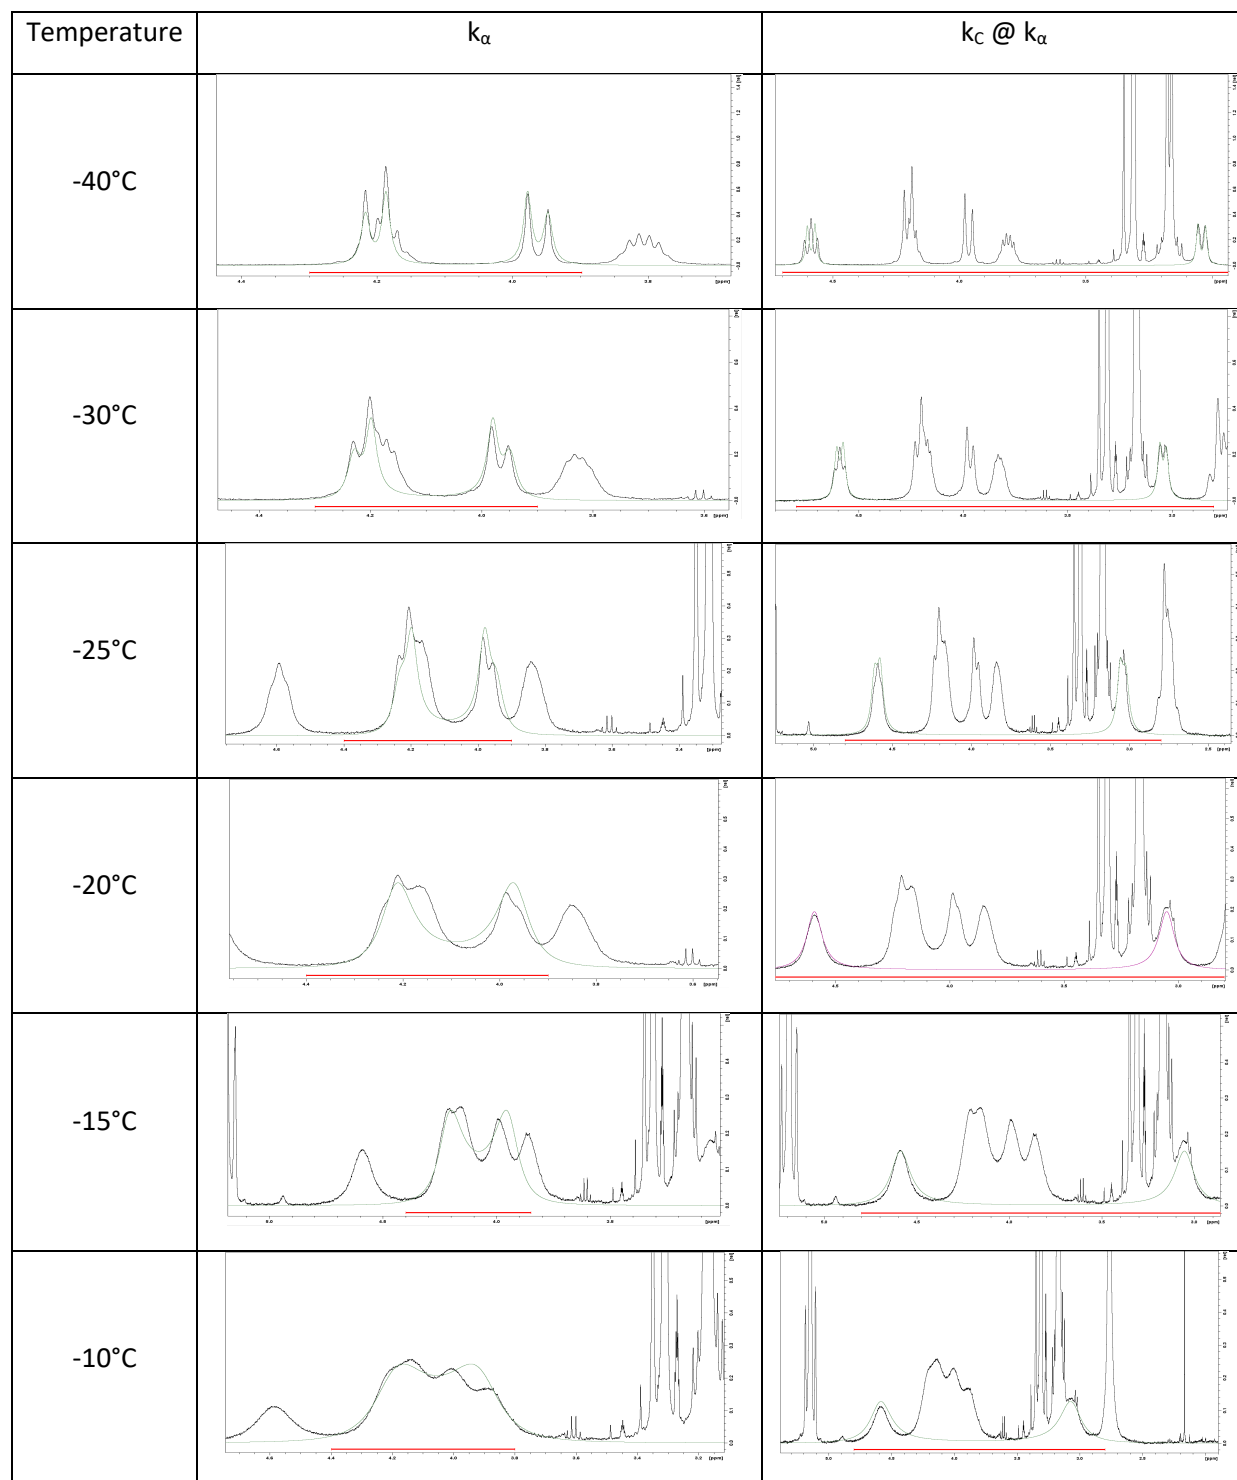

**Figure S12.** Thermodynamics Derived from DNMR for the  $\alpha$  Resonance of  $\mathbf{G}^{\text{NET}}$ . a) Temperature dependent rate constant for the selected temperatures. b) Enthalpy, entropy, and free energy calculated from the Arrhenius and Eyring plots. c) The Arrhenius plot for  $\alpha$ . d) The Eyring plot for  $\alpha$ .

| a) | T (°C) | T (K)  | 1/T     | K        | ln(k) | ln(k/T) |
|----|--------|--------|---------|----------|-------|---------|
|    | -40    | 233.15 | 0.00429 | 8.7957   | 2.174 | -3.277  |
|    | -30    | 243.15 | 0.00411 | 40.4429  | 3.700 | -1.794  |
|    | -25    | 248.15 | 0.00403 | 70.7230  | 4.259 | -1.255  |
|    | -20    | 253.15 | 0.00395 | 105.000  | 4.654 | -0.880  |
|    | -15    | 258.15 | 0.00387 | 168.5710 | 5.127 | -0.426  |
|    | -10    | 263.15 | 0.00380 | 274.1160 | 5.614 | 0.0408  |

| b) | Method         | $\Delta H^\ddagger$ | $\Delta S^\ddagger$ | $\Delta G^\ddagger$ |
|----|----------------|---------------------|---------------------|---------------------|
|    | ln(k) vs 1/T   | 13.11               | 0.00070             | 12.92               |
|    | ln(k/T) vs 1/T | 13.17               | 0.0031              | 12.32               |

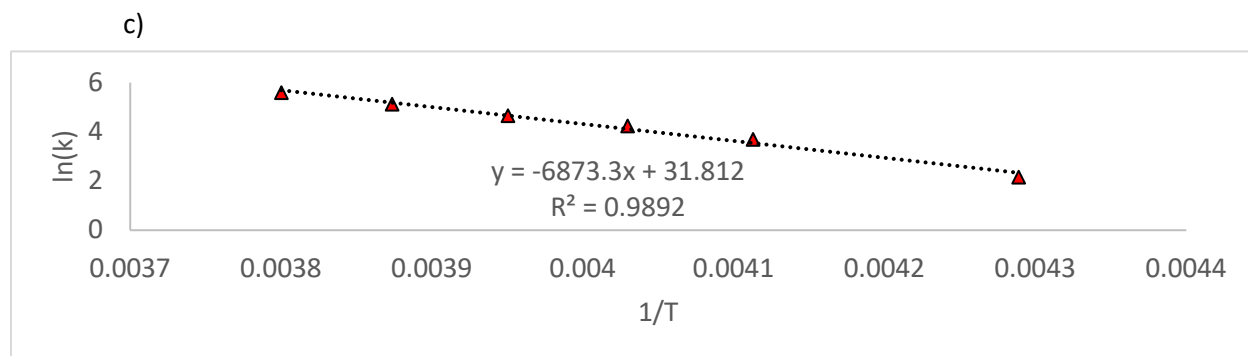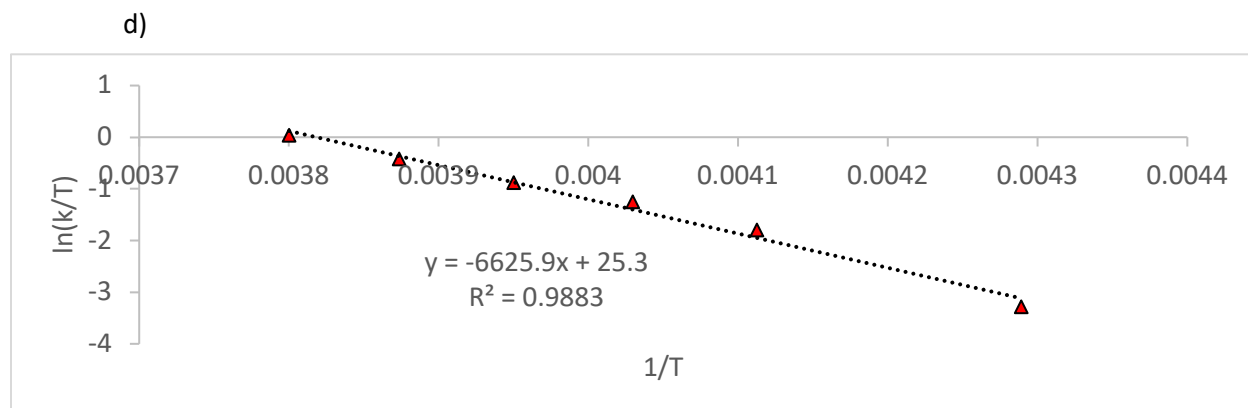

**Figure S13.** DNMR Traces for a and the Respective Fit for C for  $G^{NNet}$ . The original spectra are shown in black, while the simulated spectra are shown in green or mauve.

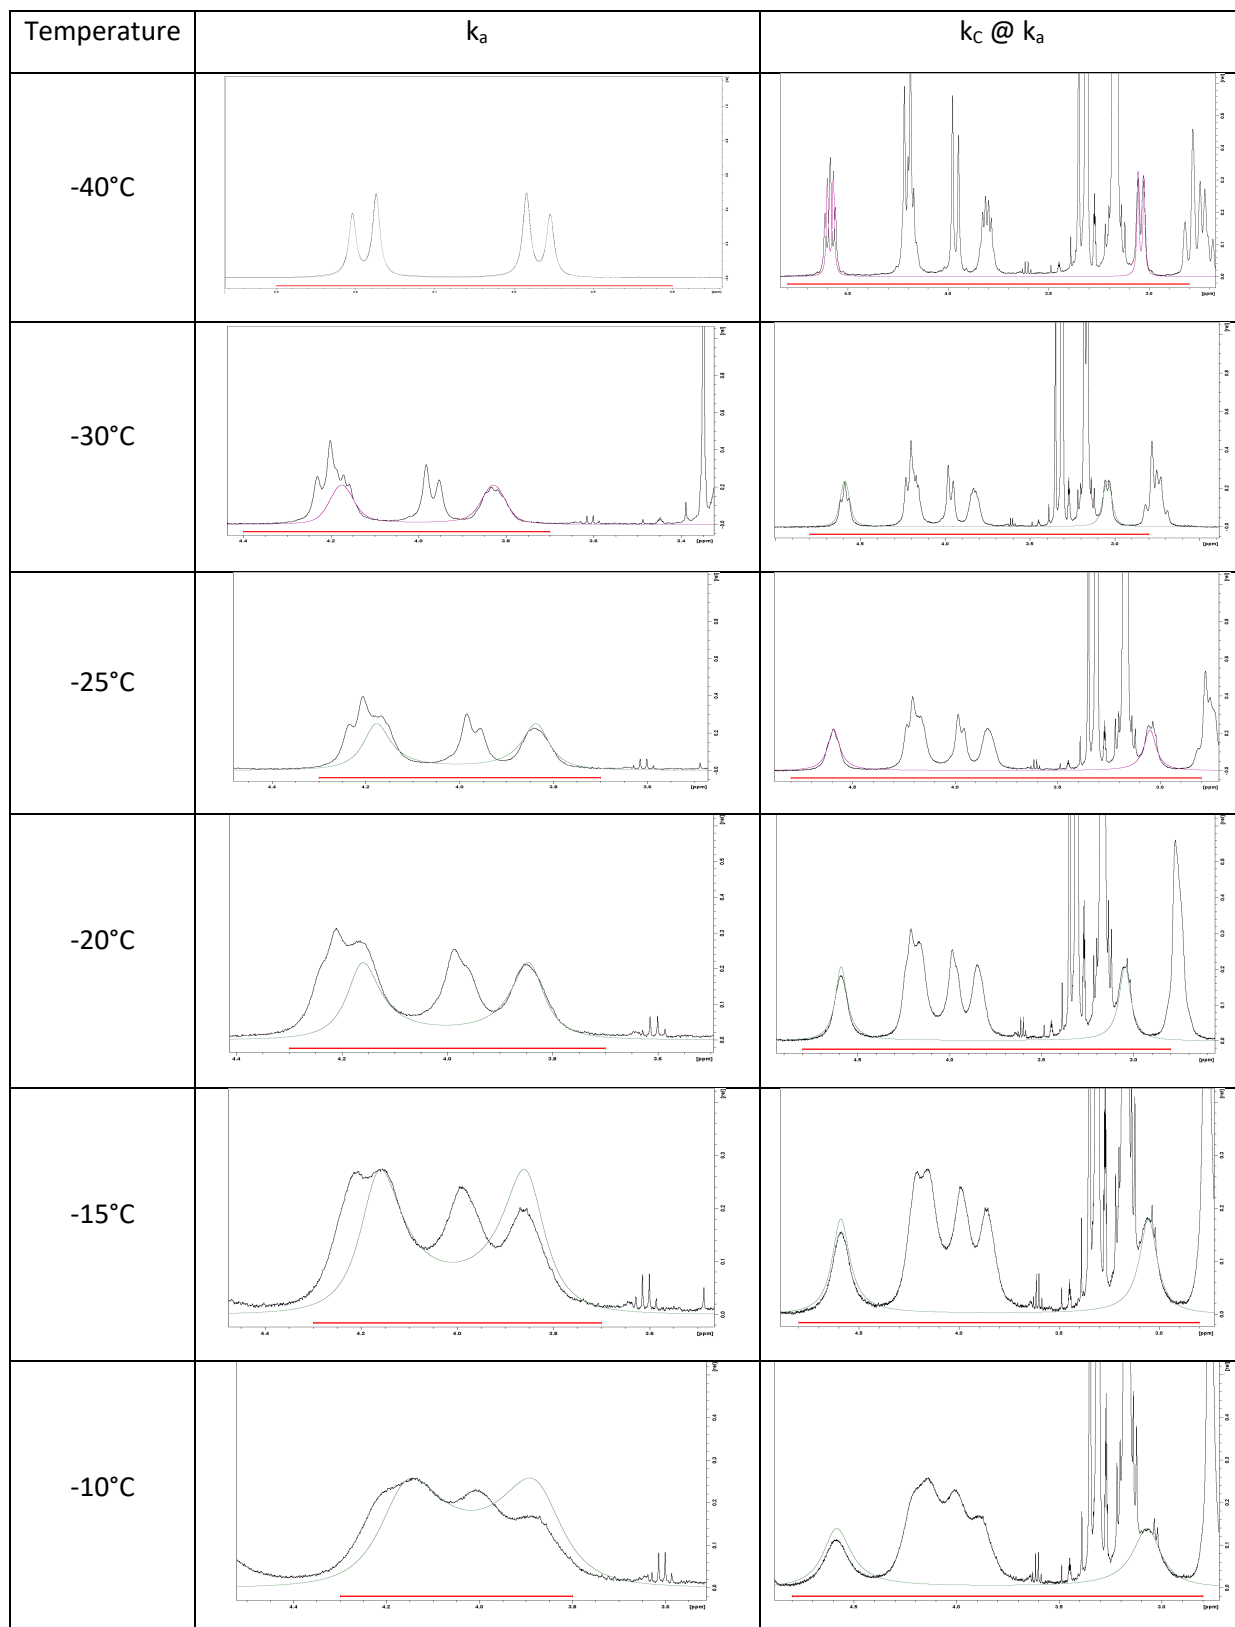

**Figure S14.** Thermodynamics Derived from DNMR for the a Resonance of  $G^{NNEt}$ . a) Temperature dependent rate constant for the selected temperatures. b) Enthalpy, entropy, and free energy calculated from the Arrhenius and Eyring plots. c) The Arrhenius plot for a. d) The Eyring plot for a.

| a) | T (°C) | T (K)  | 1/T      | K        | ln(k) | ln(k/T) |
|----|--------|--------|----------|----------|-------|---------|
|    | -40    | 233.15 | 0.004289 | 15.0000  | 2.708 | -2.744  |
|    | -30    | 243.15 | 0.004113 | 50.1210  | 3.914 | -1.579  |
|    | -25    | 248.15 | 0.00403  | 83.6348  | 4.426 | -1.088  |
|    | -20    | 253.15 | 0.00395  | 104.3380 | 4.648 | -0.886  |
|    | -15    | 258.15 | 0.003874 | 160.5000 | 5.078 | -0.475  |
|    | -10    | 263.15 | 0.0038   | 250.5000 | 5.523 | -0.0493 |

| b) | Method         | $\Delta H^\ddagger$ | $\Delta S^\ddagger$ | $\Delta G^\ddagger$ |
|----|----------------|---------------------|---------------------|---------------------|
|    | ln(k) vs 1/T   | 10.54               | -0.0084             | 12.85               |
|    | ln(k/T) vs 1/T | 10.59               | -0.0070             | 12.52               |

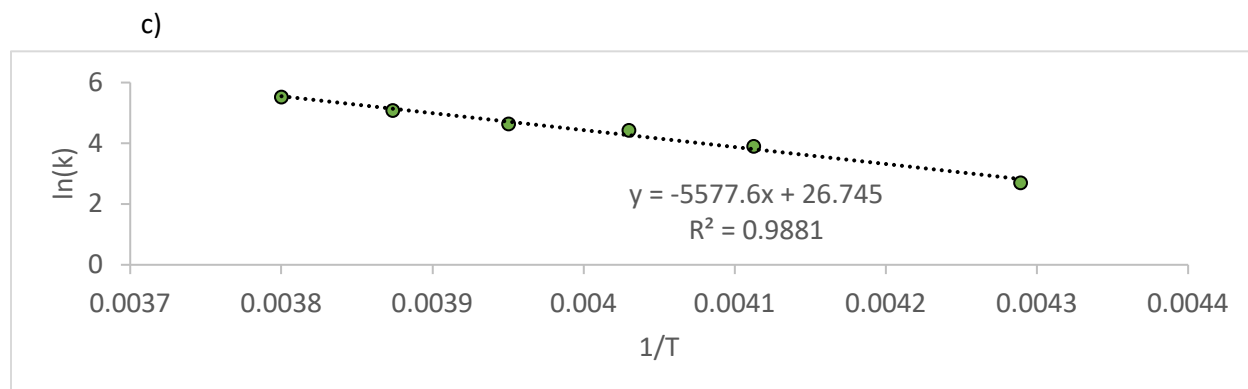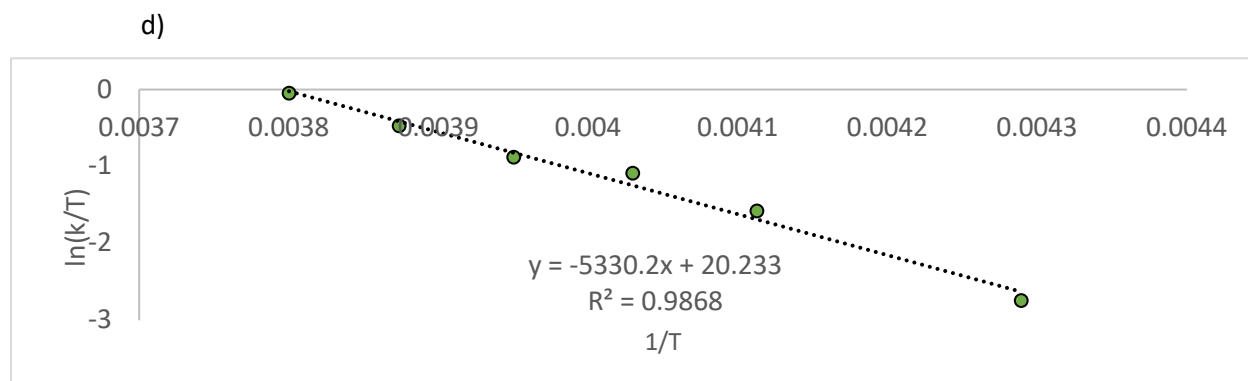

Figure S15. Stacked  $^1\text{H}$  VT-NMR Spectra of  $\text{G}^{\text{NNiPr}}$ .

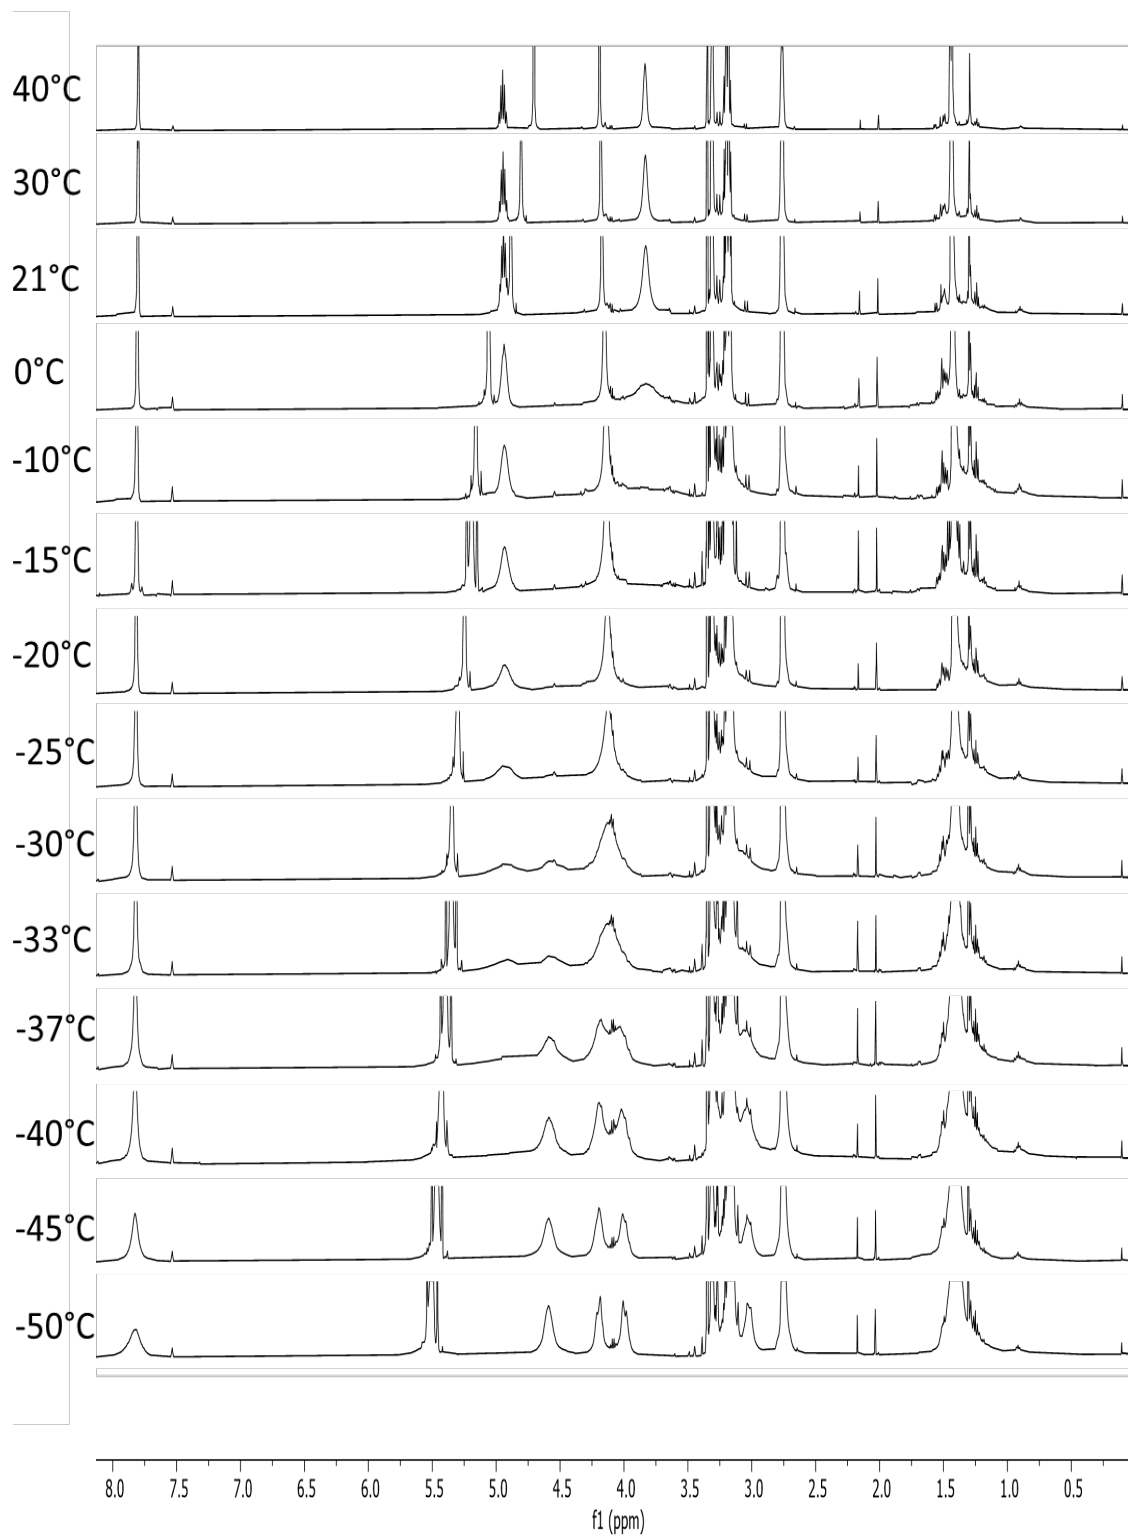

**Figure S16.** Annotated Stacked  $^1\text{H}$  VT-NMR Spectra of  $\text{G}^{\text{NniPr}}$ . The resonances corresponding to  $\alpha$  are highlighted with red with a black border. The resonances corresponding to C are highlighted with blue without a border. The resonances corresponding to a are highlighted with green with a dashed border. The inset highlights the temperatures around coalescence for C, with the resonances denoted by blue squares with a black border. The first spectrum post coalescence is denoted with the  $T_c$  in the respective resonance's color.

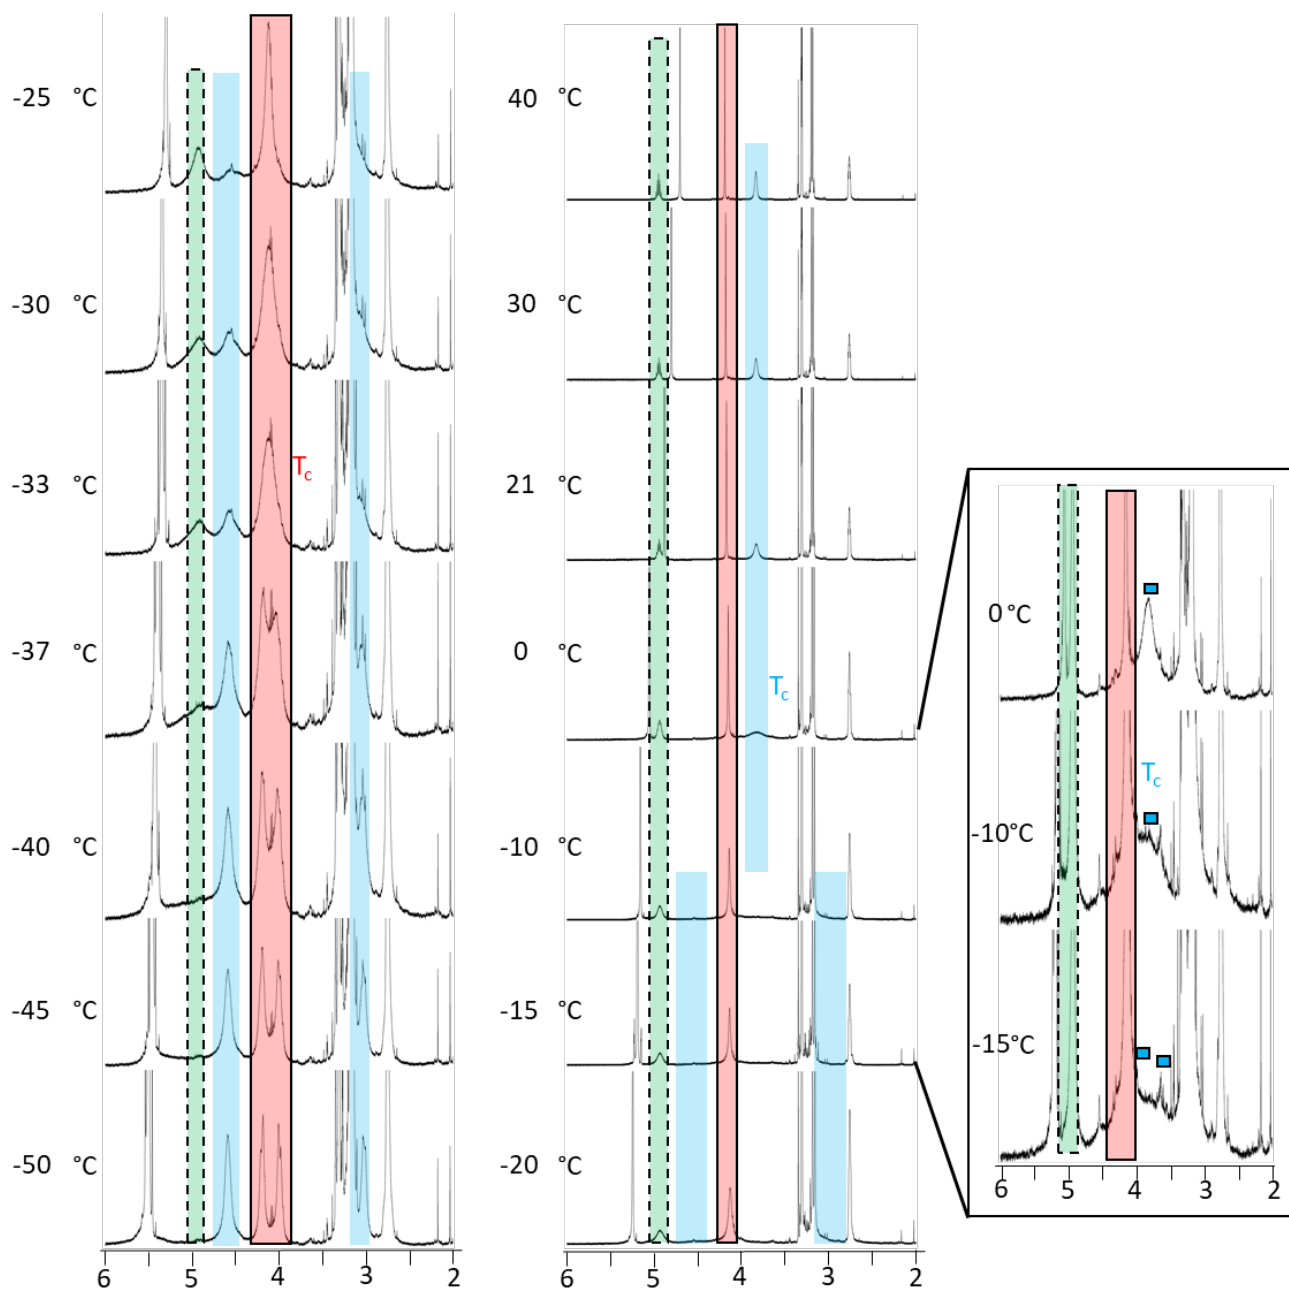



**Figure S17.** Chemical Shift Dependence on Temperature for  $G^{NNiPr}$ .

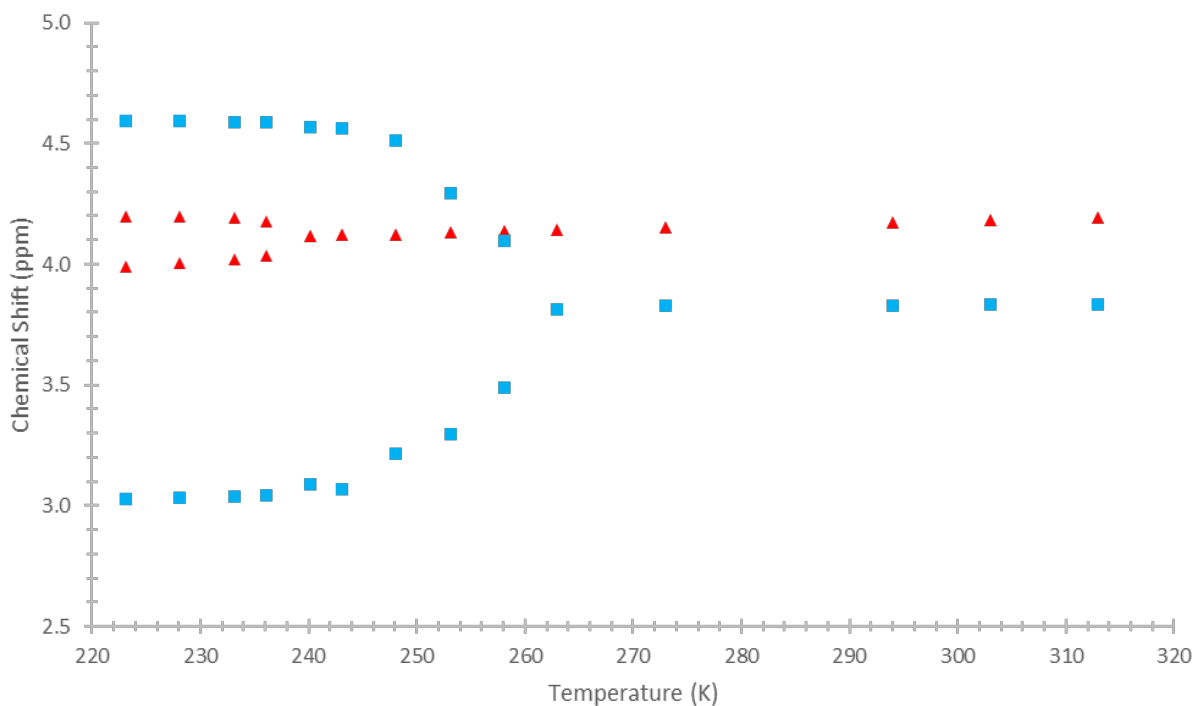

**Figure S18.** Log10 of the Difference in Chemical Shift with Temperature for  $G^{NNiPr}$ . Lines are derived from the linear sections of the graph.

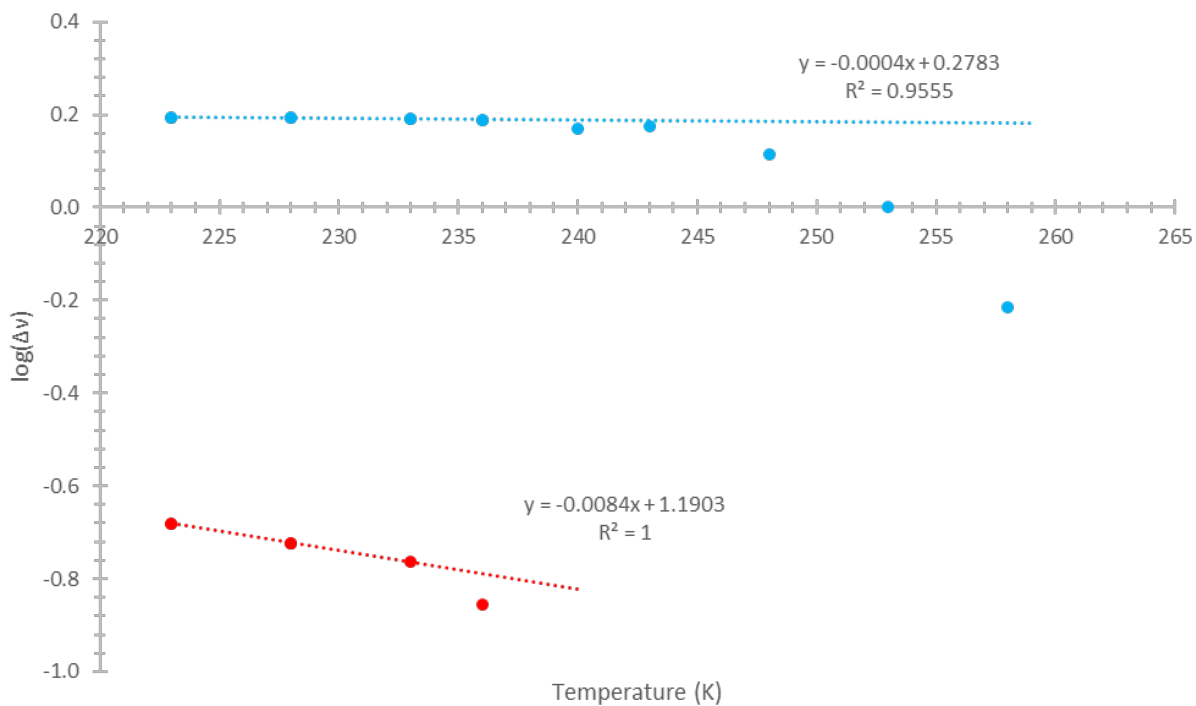

**Table S8.** Chemical Shift and  $\Delta\nu$  Dependence on Temperature for  $G^{NNiPr}$ .

| T<br>(K) | $\alpha$                |        |                      |                   | C                       |        |                      |                   |
|----------|-------------------------|--------|----------------------|-------------------|-------------------------|--------|----------------------|-------------------|
|          | Chemical Shift<br>(ppm) |        | $\Delta\nu$<br>(ppm) | $\log(\Delta\nu)$ | Chemical Shift<br>(ppm) |        | $\Delta\nu$<br>(ppm) | $\log(\Delta\nu)$ |
| 313      | 4.1903                  | 4.1903 | -                    | -                 | 3.8350                  | 3.8350 | -                    | -                 |
| 303      | 4.1804                  | 4.1804 | -                    | -                 | 3.8318                  | 3.8318 | -                    | -                 |
| 294      | 4.1716                  | 4.1716 | -                    | -                 | 3.8294                  | 3.8294 | -                    | -                 |
| 273      | 4.1518                  | 4.1518 | -                    | -                 | 3.8260                  | 3.8260 | -                    | -                 |
| 263      | 4.1397                  | 4.1397 | -                    | -                 | 3.8142                  | 3.8142 | -                    | -                 |
| 258      | 4.1359                  | 4.1359 | -                    | -                 | 4.0953                  | 3.4869 | 0.6084               | -0.2158           |
| 253      | 4.1297                  | 4.1297 | -                    | -                 | 4.2960                  | 3.2948 | 1.0012               | 0.0005            |
| 248      | 4.1223                  | 4.1223 | -                    | -                 | 4.5120                  | 3.2129 | 1.2991               | 0.1136            |
| 243      | 4.1200                  | 4.1200 | -                    | -                 | 4.5640                  | 3.0650 | 1.4990               | 0.1758            |
| 240      | 4.1160                  | 4.1160 | -                    | -                 | 4.5690                  | 3.0900 | 1.4790               | 0.1700            |
| 236      | 4.1760                  | 4.0362 | 0.1398               | -0.8545           | 4.5880                  | 3.0420 | 1.5460               | 0.1892            |
| 233      | 4.1903                  | 4.0179 | 0.1724               | -0.7635           | 4.5899                  | 3.0389 | 1.5510               | 0.1906            |
| 228      | 4.1962                  | 4.0069 | 0.1893               | -0.7228           | 4.5930                  | 3.0330 | 1.5600               | 0.1931            |
| 223      | 4.1973                  | 3.9888 | 0.2085               | -0.6809           | 4.5923                  | 3.0293 | 1.5630               | 0.1940            |

**Table S9.** Relevant Variables for the Determination of  $\Delta G^\ddagger$  for  $G^{NNiPr}$ .

|          | $T_c$<br>(K) | $\log(\Delta\nu)$ | $\Delta\nu@T_c$ (ppm) | k<br>(MHz) | $\Delta G^\ddagger$ (kcal/mol) |
|----------|--------------|-------------------|-----------------------|------------|--------------------------------|
| $\alpha$ | 238          | -0.8068           | 0.1560                | 173.3      | 11.39                          |
| C        | 260.5        | 0.1803            | 1.5140                | 1682.1     | 11.33                          |
|          |              |                   |                       | Average    | 11.36                          |

**Figure S19.** DNMR Traces for  $\alpha$  and the Respective Fit for C for  $G^{NNiPr}$ . The original spectra are shown in black, while the simulated spectra is shown in green or mauve.

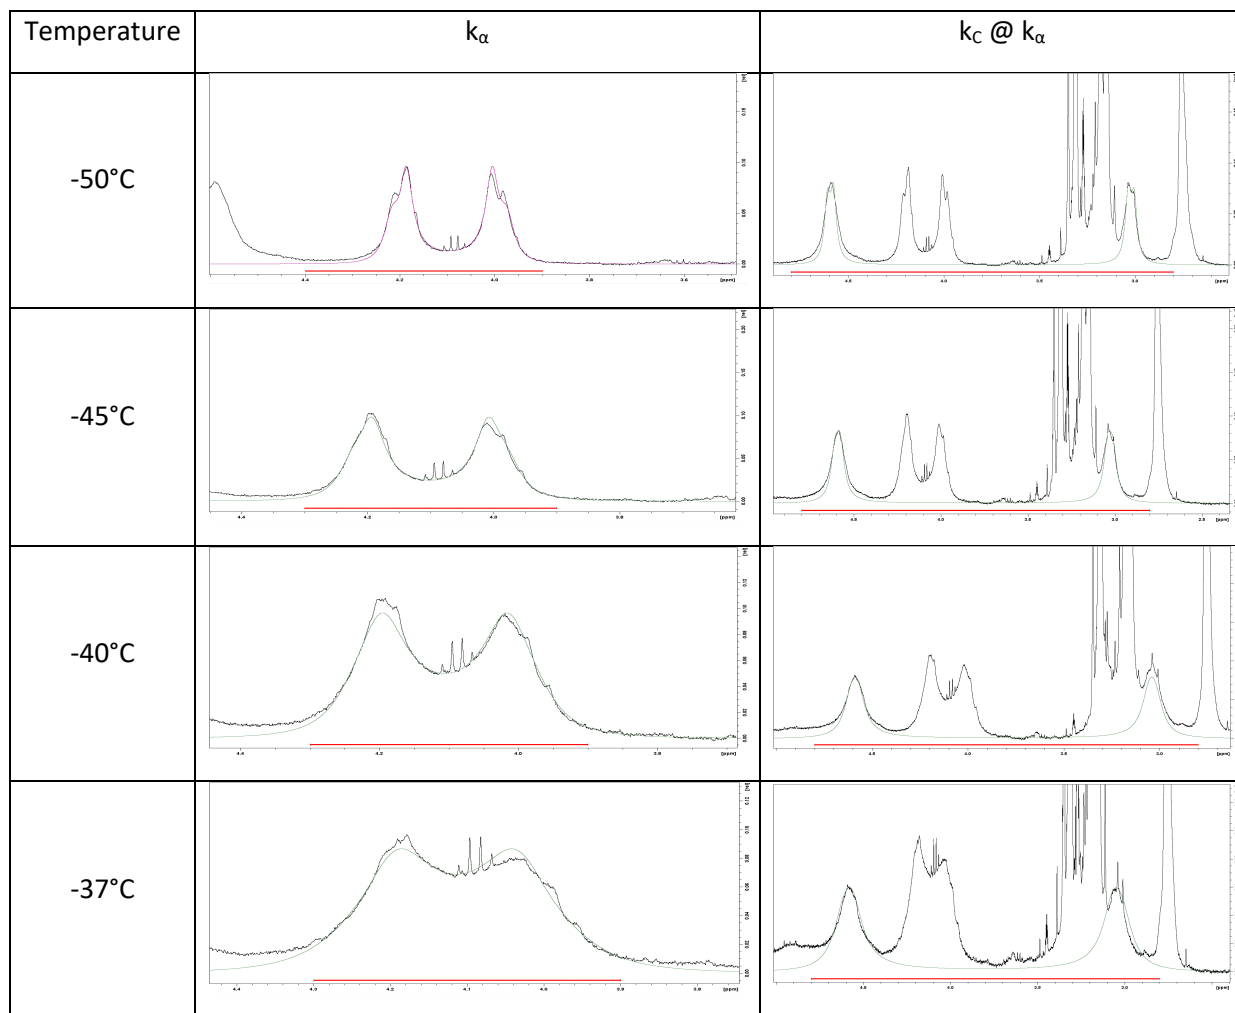

**Figure S20.** Thermodynamics Derived from DNMR for  $G^{NNiPr}$ . a) Temperature dependent rate constant for the selected temperatures. b) Enthalpy, entropy, and free energy calculated from the Arrhenius and Eyring plots. c) The Arrhenius plot for  $G^{NNiPr}$ . d) The Eyring plot for  $G^{NNiPr}$ .

| a) | T (°C) | T (K)  | 1/T     | K        | ln(k) | ln(k/T) |
|----|--------|--------|---------|----------|-------|---------|
|    | -50    | 223.15 | 0.00448 | 56.5757  | 4.036 | -1.372  |
|    | -45    | 228.15 | 0.00438 | 82.8880  | 4.417 | -1.013  |
|    | -40    | 233.15 | 0.00429 | 141.6530 | 4.953 | -0.498  |
|    | -37    | 236.15 | 0.00424 | 222.2060 | 5.404 | -0.0609 |

| b) | Method         | $\Delta H^\ddagger$ | $\Delta S^\ddagger$ | $\Delta G^\ddagger$ |
|----|----------------|---------------------|---------------------|---------------------|
|    | ln(k) vs 1/T   | 10.39               | -0.0042             | 11.39               |
|    | ln(k/T) vs 1/T | 10.41               | -0.0034             | 11.23               |

c)

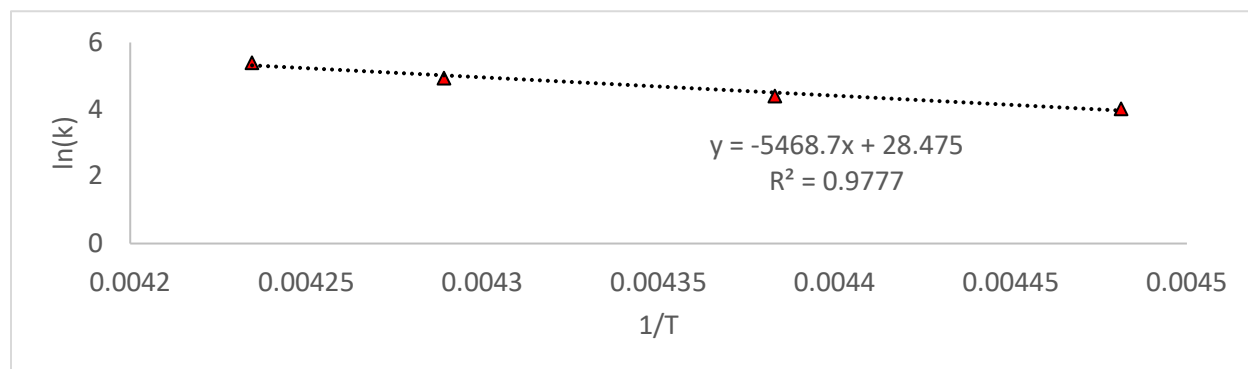

d)

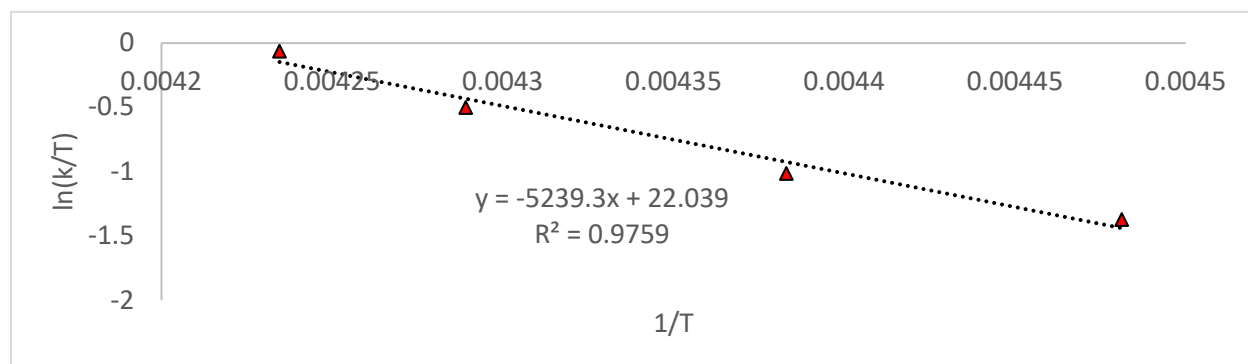

Figure S21. Stacked  $^1\text{H}$  VT-NMR Spectra of  $\text{G}^{\text{NNBn}}$ .

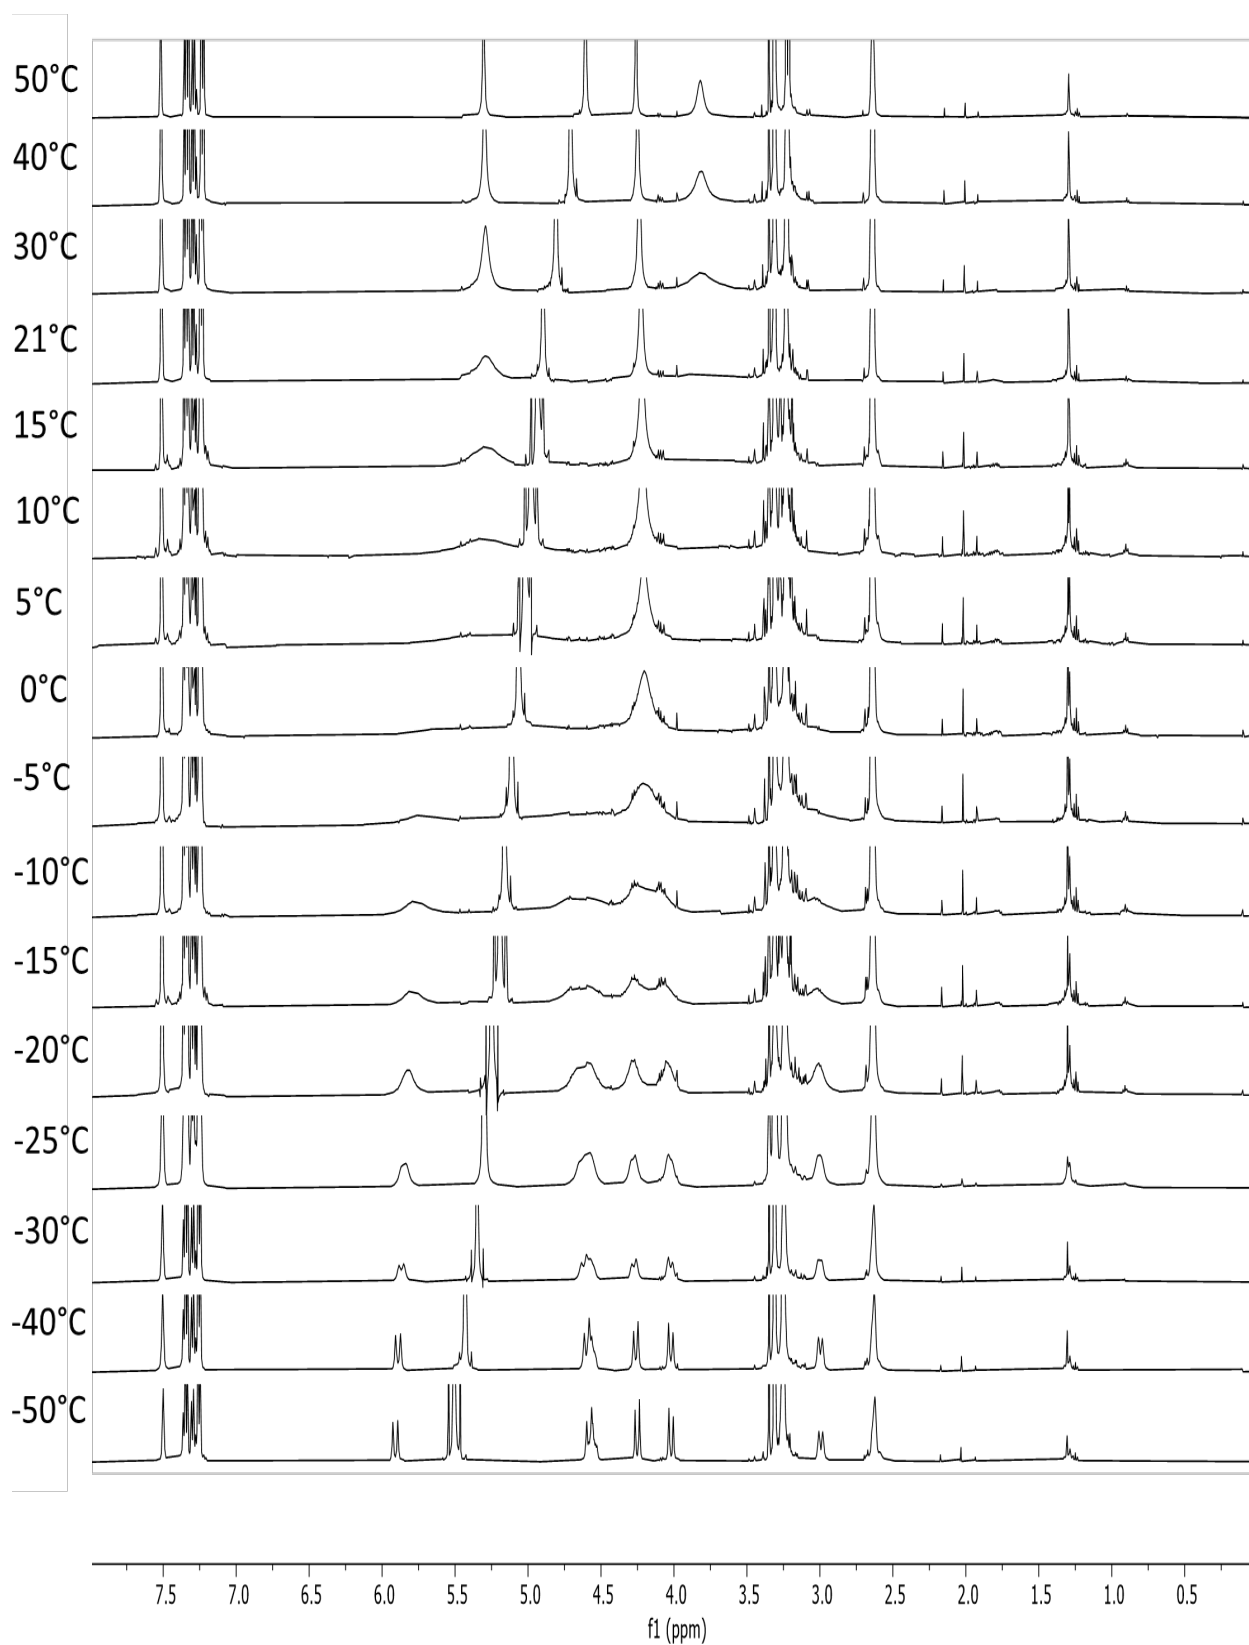

**Figure S22.** Annotated Stacked  $^1\text{H}$  VT-NMR Spectra of  $\text{G}^{\text{NNB}^n}$ . The resonances corresponding to  $\alpha$  are highlighted with red with a black border. The resonances corresponding to C are highlighted with blue without a border. The resonances corresponding to a are highlighted with green with a dashed border. The inset highlights the temperatures around coalescence for C, with the resonances denoted by blue squares with a black border. The first spectrum post coalescence is denoted with the  $T_c$  in the respective resonance's color.

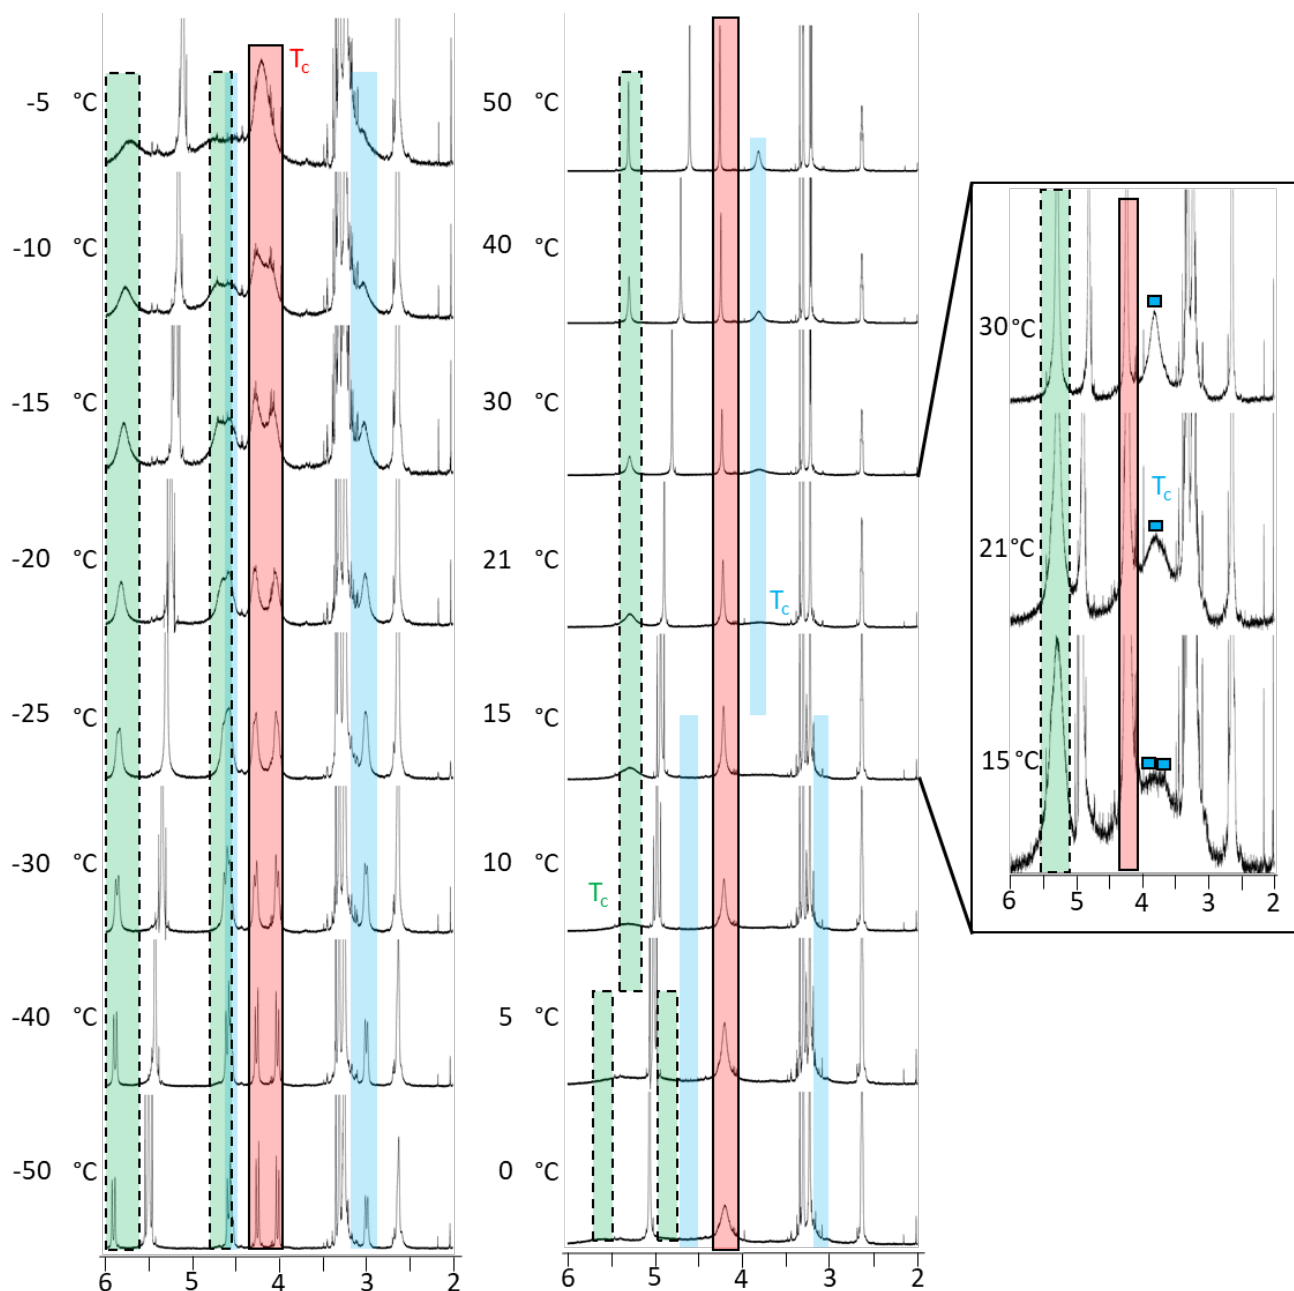

**Figure S23.** Chemical Shift Dependence on Temperature for  $G^{NNBn}$ .

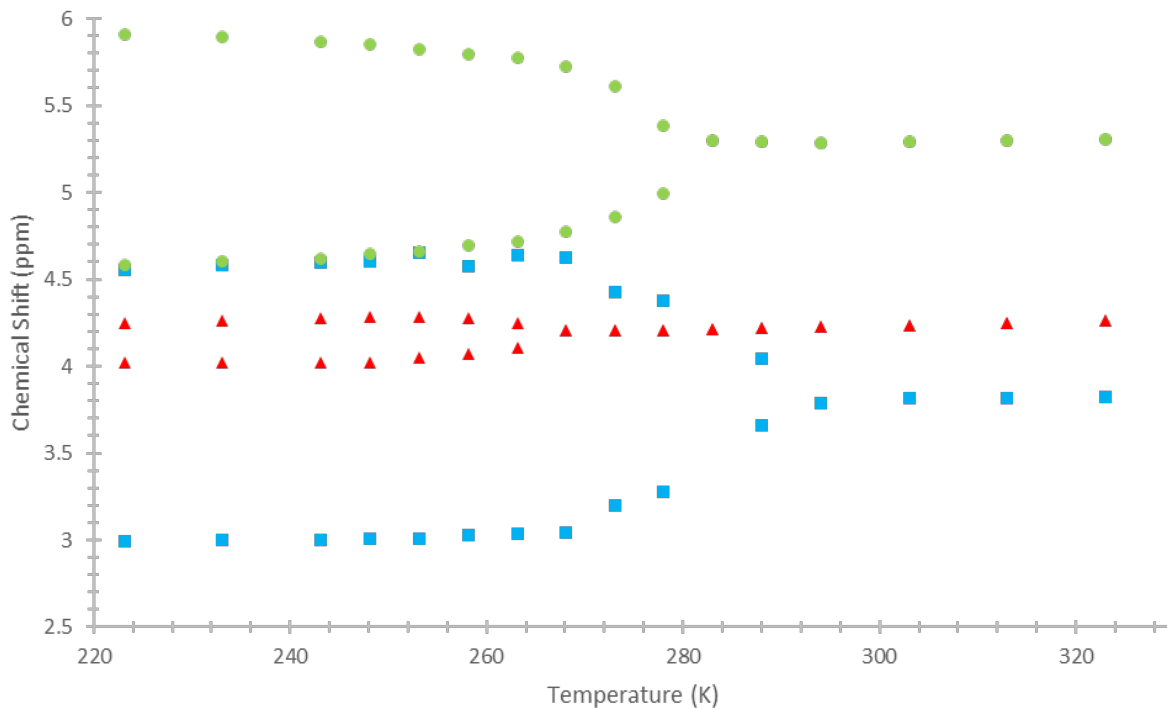

**Figure S24.** Log10 of the Difference in Chemical Shift with Temperature for  $G^{NNBn}$ . Lines are derived from the linear sections of the graph.

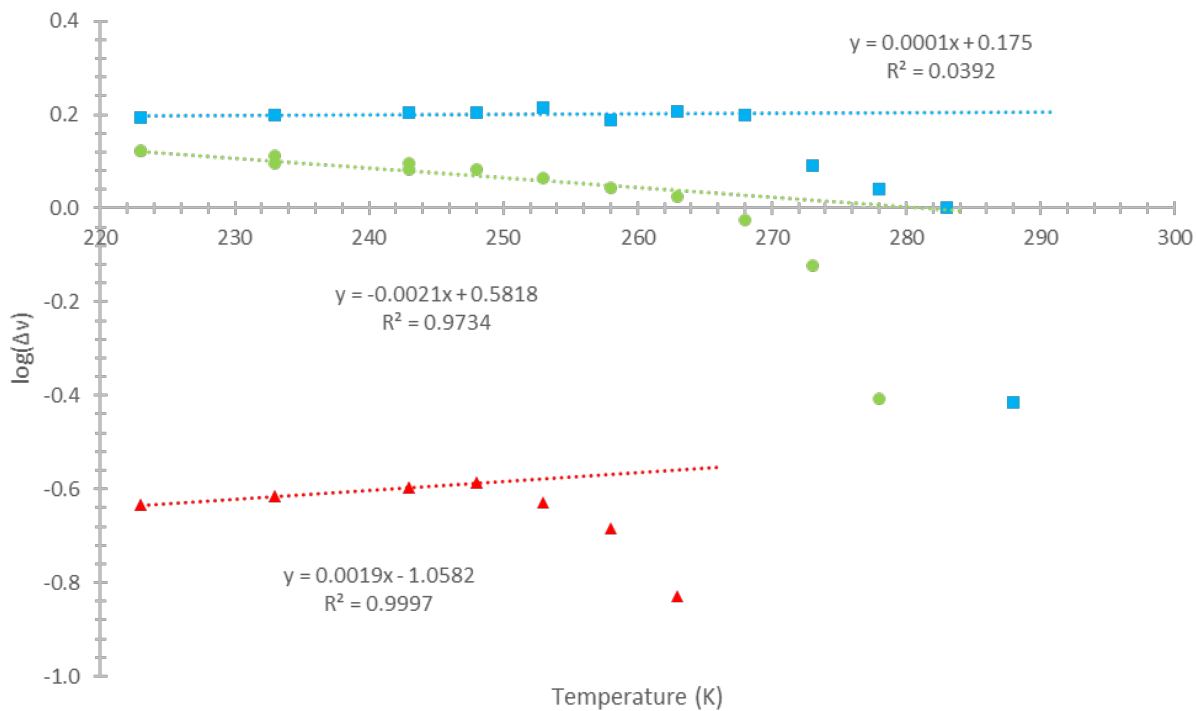

**Table S10.** Chemical Shift and  $\Delta\nu$  Dependence on Temperature for  $G^{NNBn}$ .

| T<br>(K) | $\alpha$                |        |                      |                   | C                       |         |                      |                   | NCH2                    |        |                      |                   |
|----------|-------------------------|--------|----------------------|-------------------|-------------------------|---------|----------------------|-------------------|-------------------------|--------|----------------------|-------------------|
|          | Chemical Shift<br>(ppm) |        | $\Delta\nu$<br>(ppm) | $\log(\Delta\nu)$ | Chemical Shift<br>(ppm) |         | $\Delta\nu$<br>(ppm) | $\log(\Delta\nu)$ | Chemical Shift<br>(ppm) |        | $\Delta\nu$<br>(ppm) | $\log(\Delta\nu)$ |
| 323      | 4.2601                  | 4.2601 | -                    | -                 | 3.8202                  | 3.8202  | -                    | -                 | 5.3041                  | 5.3041 | -                    | -                 |
| 313      | 4.2491                  | 4.2491 | -                    | -                 | 3.8144                  | 3.8144  | -                    | -                 | 5.2981                  | 5.2981 | -                    | -                 |
| 303      | 4.2372                  | 4.2372 | -                    | -                 | 3.8152                  | 3.8152  | -                    | -                 | 5.2921                  | 5.2921 | -                    | -                 |
| 294      | 4.2253                  | 4.2253 | -                    | -                 | 3.7903                  | 3.7903  | -                    | -                 | 5.2876                  | 5.2876 | -                    | -                 |
| 288      | 4.2196                  | 4.2196 | -                    | -                 | 4.0430                  | 3.6580  | 0.3850               | -0.4145           | 5.2890                  | 5.2890 | -                    | -                 |
| 283      | 4.2164                  | 4.2164 | -                    | -                 | -                       | -       | -                    | -                 | 5.3010                  | 5.3010 | -                    | -                 |
| 278      | 4.2073                  | 4.2073 | -                    | -                 | 4.3760                  | 3.2751  | 1.1009               | 0.0417            | 5.3870                  | 4.9962 | 0.3908               | -0.4080           |
| 273      | 4.2049                  | 4.2049 | -                    | -                 | 4.4291                  | 3.1956  | 1.2335               | 0.0911            | 5.6110                  | 4.8560 | 0.7550               | -0.1221           |
| 268      | 4.2074                  | 4.2074 | -                    | -                 | 4.6263                  | 3.0424  | 1.5839               | 0.1997            | 5.7236                  | 4.7770 | 0.9466               | -0.0238           |
| 263      | 4.2517                  | 4.1038 | 0.1479               | -0.8300           | 4.6415                  | 3.0356  | 1.6059               | 0.2057            | 5.7735                  | 4.7142 | 1.0593               | 0.0250            |
| 258      | 4.2770                  | 4.0700 | 0.2070               | -0.6840           | 4.5730                  | 3.0310  | 1.5420               | 0.1881            | 5.7960                  | 4.6940 | 1.1020               | 0.0422            |
| 253      | 4.2817                  | 4.0466 | 0.2351               | -0.6287           | 4.6499                  | 3.0085  | 1.6414               | 0.2152            | 5.8211                  | 4.6590 | 1.1621               | 0.0652            |
| 248      | 4.2820                  | 4.0230 | 0.2590               | -0.5867           | 4.6022                  | 3.0041  | 1.5981               | 0.2036            | 5.8516                  | 4.6440 | 1.2076               | 0.0819            |
| 243      | 4.2749                  | 4.0220 | 0.2529               | -0.5971           | 4.5996                  | 3.0010  | 1.5986               | 0.2037            | 5.8687                  | 4.6194 | 1.2493               | 0.0967            |
| 233      | 4.2640                  | 4.0216 | 0.2424               | -0.6155           | 4.5814                  | 2.9980  | 1.5834               | 0.1996            | 5.8909                  | 4.5998 | 1.2911               | 0.1110            |
| 223      | 4.2515                  | 4.0195 | 0.2320               | -0.6345           | 4.5567                  | 2.99385 | 1.5629               | 0.1939            | 5.9092                  | 4.5811 | 1.3281               | 0.1232            |

**Table S11.** Relevant Variables for the Determination of  $\Delta G^\ddagger$  for  $G^{NNBn}$ .

|          | $T_c$<br>(K) | $\log(\Delta\nu)$ | $\Delta\nu@T_c$ (ppm) | k<br>(MHz) | $\Delta G^\ddagger$ (kcal/mol) |
|----------|--------------|-------------------|-----------------------|------------|--------------------------------|
| $\alpha$ | 265.5        | -0.5538           | 0.2794                | 310.3      | 12.45                          |
| C        | 291          | 0.2057            | 1.6057                | 1783.5     | 12.69                          |
| a        | 280.5        | 0.0025            | 1.0058                | 1117.1     | 12.47                          |
|          |              |                   |                       | Average    | 12.54                          |



**Figure S25.** DNMR Traces for  $\alpha$  and the Respective Fit for C for  $G^{NNBn}$ . The original spectra are shown in black, while the simulated spectra are shown in green or mauve.

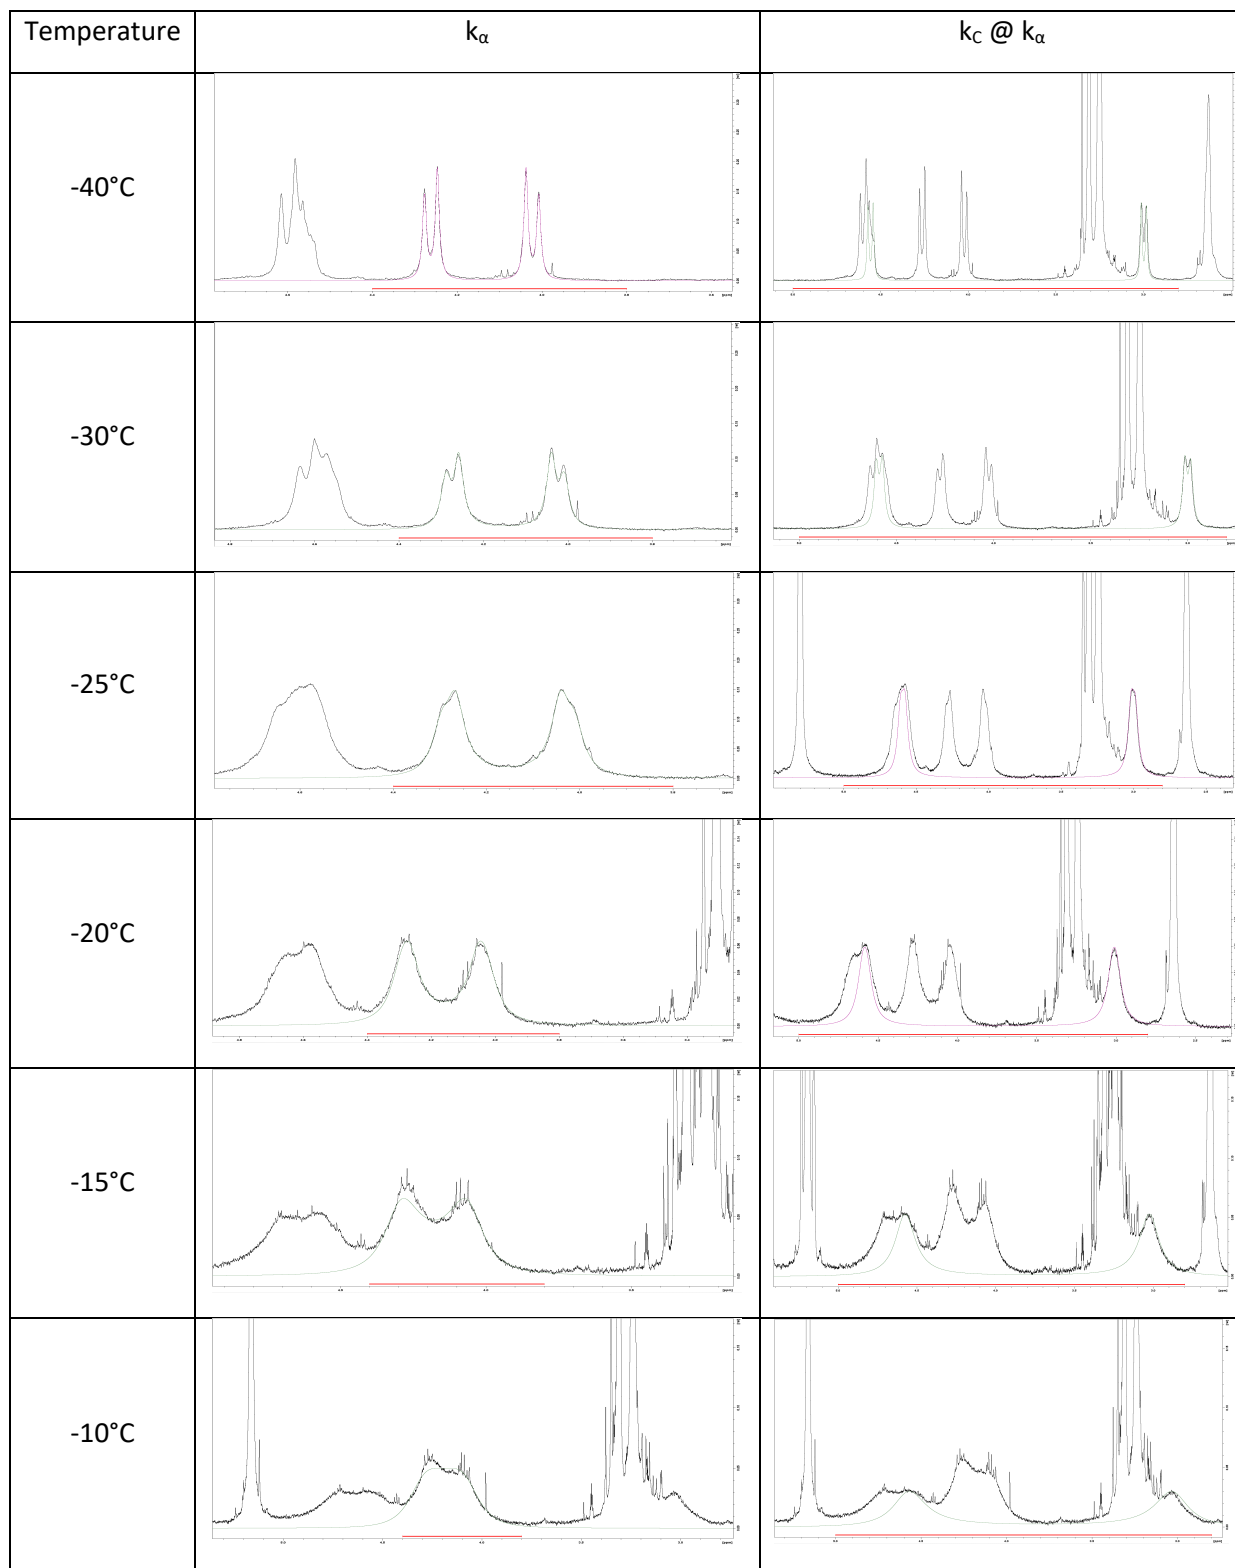

**Figure S26.** Thermodynamics Derived from DNMR for the  $\alpha$  Resonance of  $\mathbf{G}^{\text{NNBn}}$ . a) Temperature dependent rate constant for the selected temperatures. b) Enthalpy, entropy, and free energy calculated from the Arrhenius and Eyring plots. c) The Arrhenius plot for  $\alpha$ . d) The Eyring plot for  $\alpha$ .

| a) | T (°C) | T (K)  | 1/T     | K        | ln(k) | ln(k/T) |
|----|--------|--------|---------|----------|-------|---------|
|    | -40    | 233.15 | 0.00429 | 1.9983   | 0.692 | -4.759  |
|    | -30    | 243.15 | 0.00411 | 17.0574  | 2.837 | -2.657  |
|    | -25    | 248.15 | 0.00403 | 39.3406  | 3.672 | -1.842  |
|    | -20    | 253.15 | 0.00395 | 45.2247  | 3.812 | -1.722  |
|    | -15    | 258.15 | 0.00387 | 143.2420 | 4.965 | -0.589  |
|    | -10    | 263.15 | 0.00380 | 337.5820 | 5.822 | 0.249   |

| b) | Method         | $\Delta H^\ddagger$ | $\Delta S^\ddagger$ | $\Delta G^\ddagger$ |
|----|----------------|---------------------|---------------------|---------------------|
|    | ln(k) vs 1/T   | 19.38               | 0.026               | 12.45               |
|    | ln(k/T) vs 1/T | 19.42               | 0.027               | 12.28               |

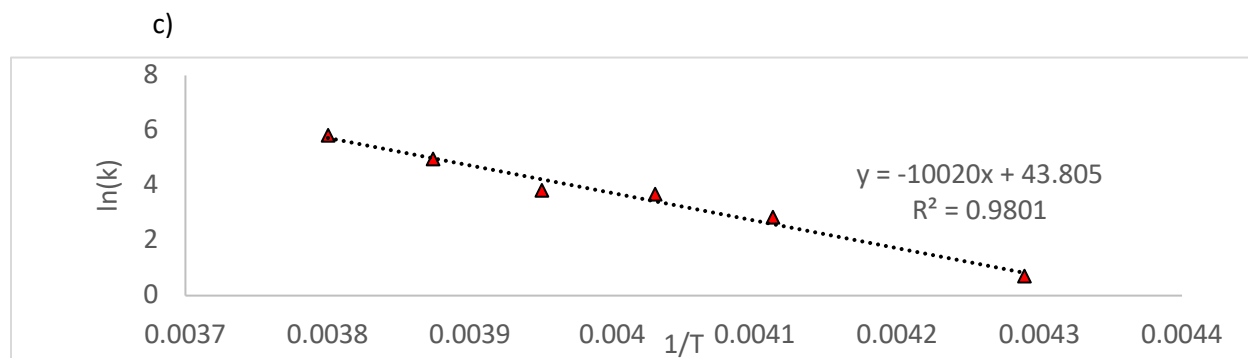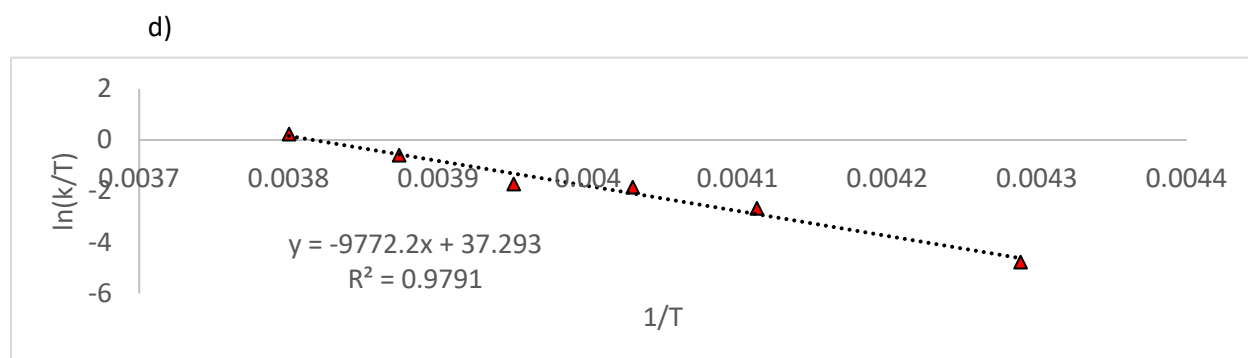

**Figure S27.** DNMR Traces for a and the Respective Fit for C for  $G^{NNBn}$ . The original spectra are shown in black, while the simulated spectra are shown in green or mauve.

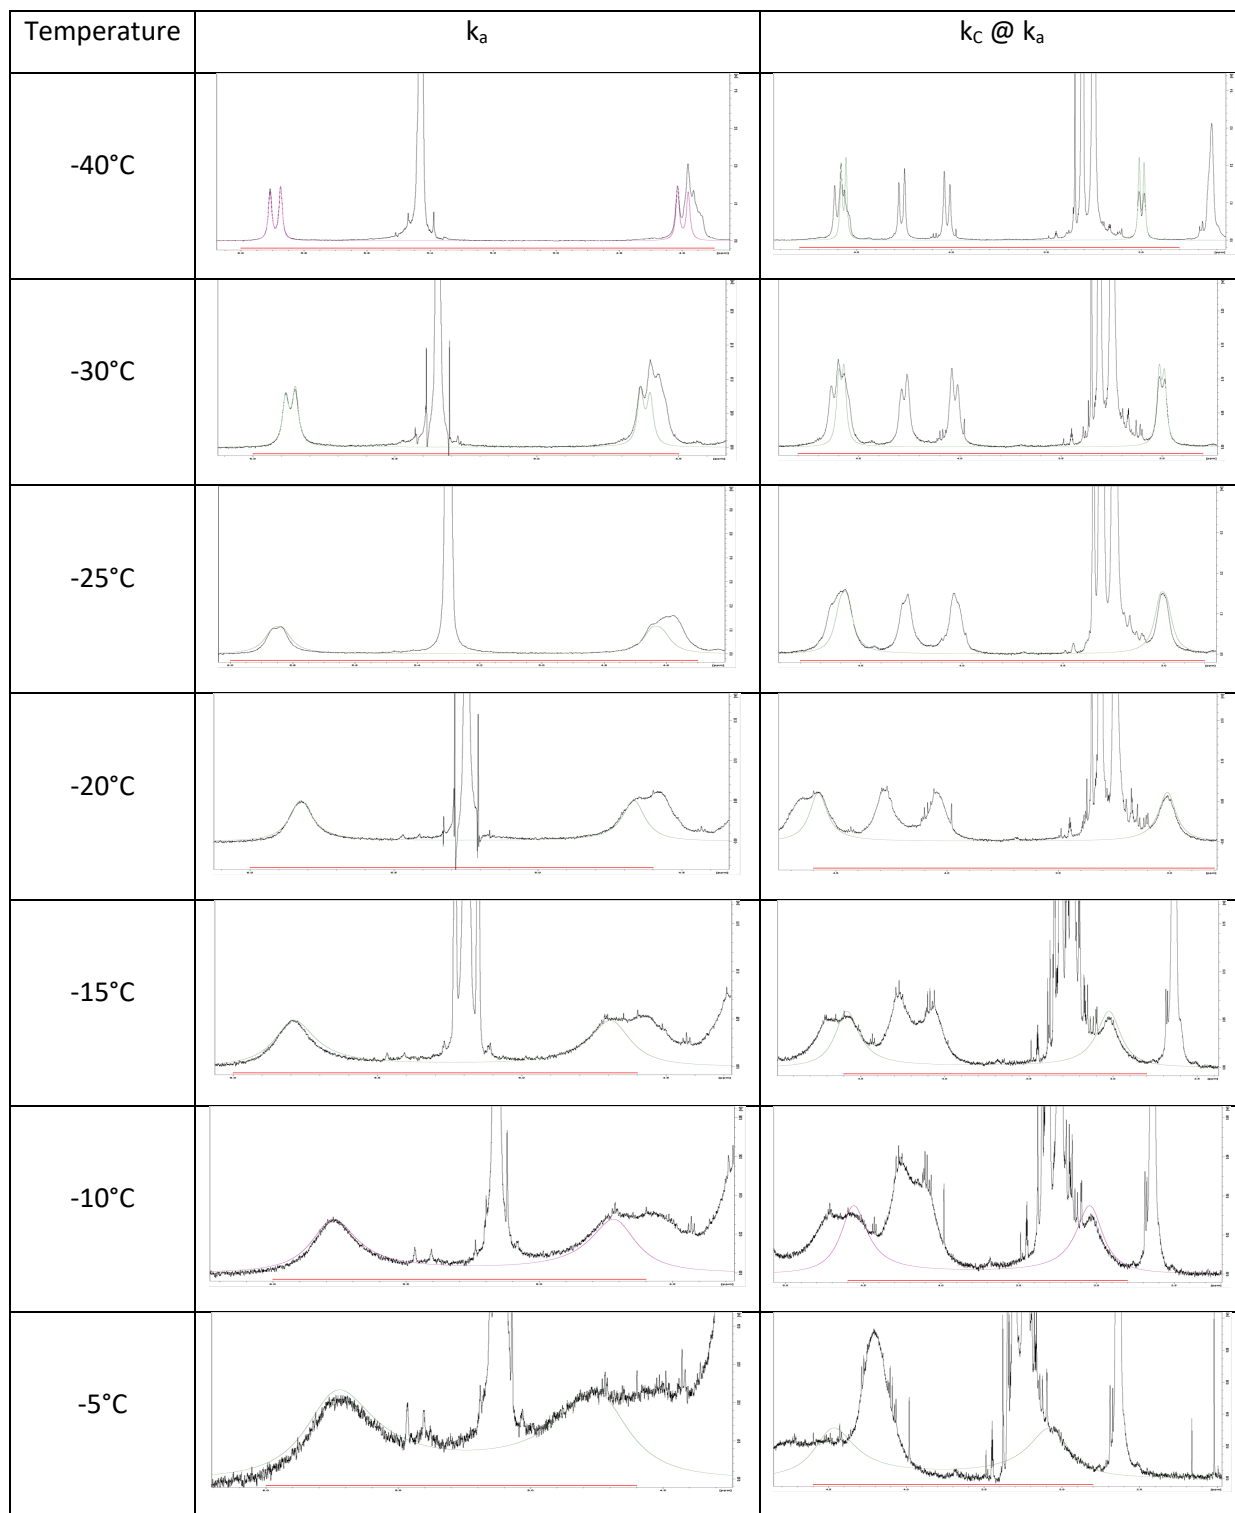

**Figure S28.** Thermodynamics Derived from DNMR for the a Resonance of  $G^{NNBn}$ . a) Temperature dependent rate constant for the selected temperatures. b) Enthalpy, entropy, and free energy calculated from the Arrhenius and Eyring plots. c) The Arrhenius plot for a. d) The Eyring plot for a.

| a) | T (°C) | T (K)  | 1/T     | K        | ln(k) | ln(k/T) |
|----|--------|--------|---------|----------|-------|---------|
|    | -40    | 233.15 | 0.00429 | 19.5276  | 6.206 | -2.480  |
|    | -30    | 243.15 | 0.00411 | 40.5199  | 2.972 | -1.792  |
|    | -25    | 248.15 | 0.00403 | 78.1166  | 3.702 | -1.156  |
|    | -20    | 253.15 | 0.00395 | 146.0670 | 4.358 | -0.550  |
|    | -15    | 258.15 | 0.00387 | 269.2690 | 4.984 | 0.0422  |
|    | -10    | 263.15 | 0.00380 | 295.5500 | 5.596 | 0.116   |
|    | -5     | 268.15 | 0.00373 | 495.6800 | 5.689 | 0.614   |

| b) | Method         | $\Delta H^\ddagger$ | $\Delta S^\ddagger$ | $\Delta G^\ddagger$ |
|----|----------------|---------------------|---------------------|---------------------|
|    | ln(k) vs 1/T   | 11.39               | -0.00385            | 12.47               |
|    | ln(k/T) vs 1/T | 11.45               | -0.00324            | 12.31               |

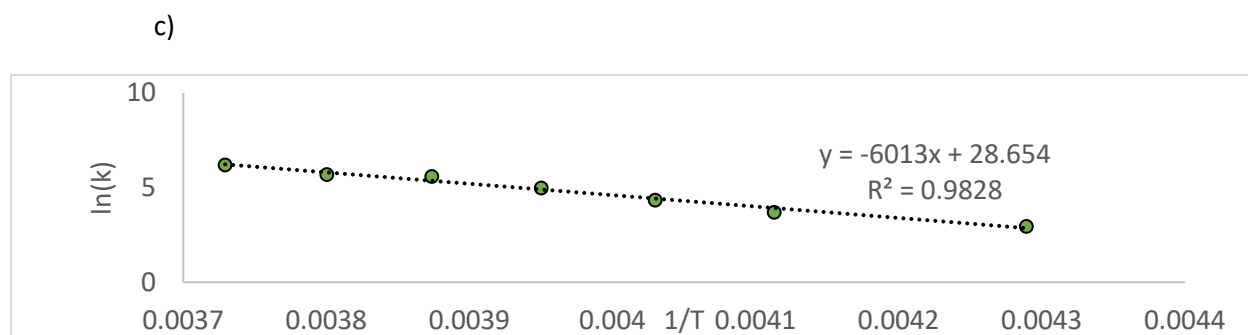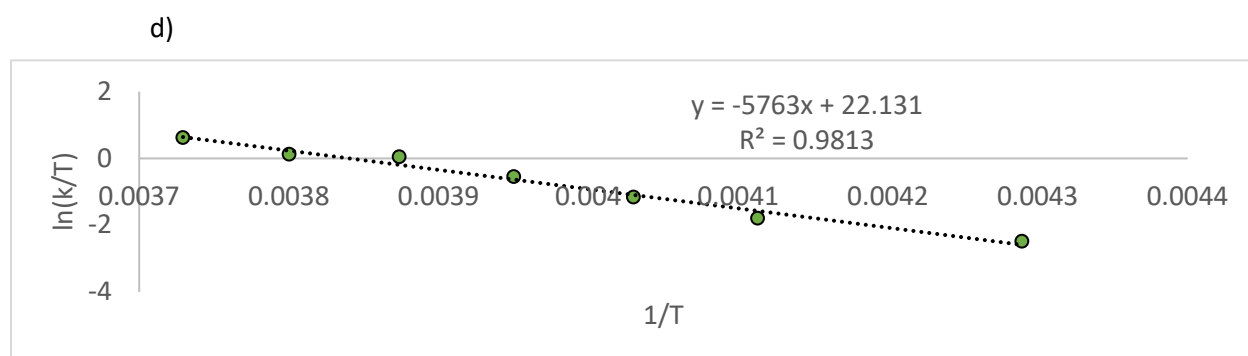

Figure S29. Stacked  $^1\text{H}$  VT-NMR Spectra of  $\text{G}^{\text{NNHx}}$ .

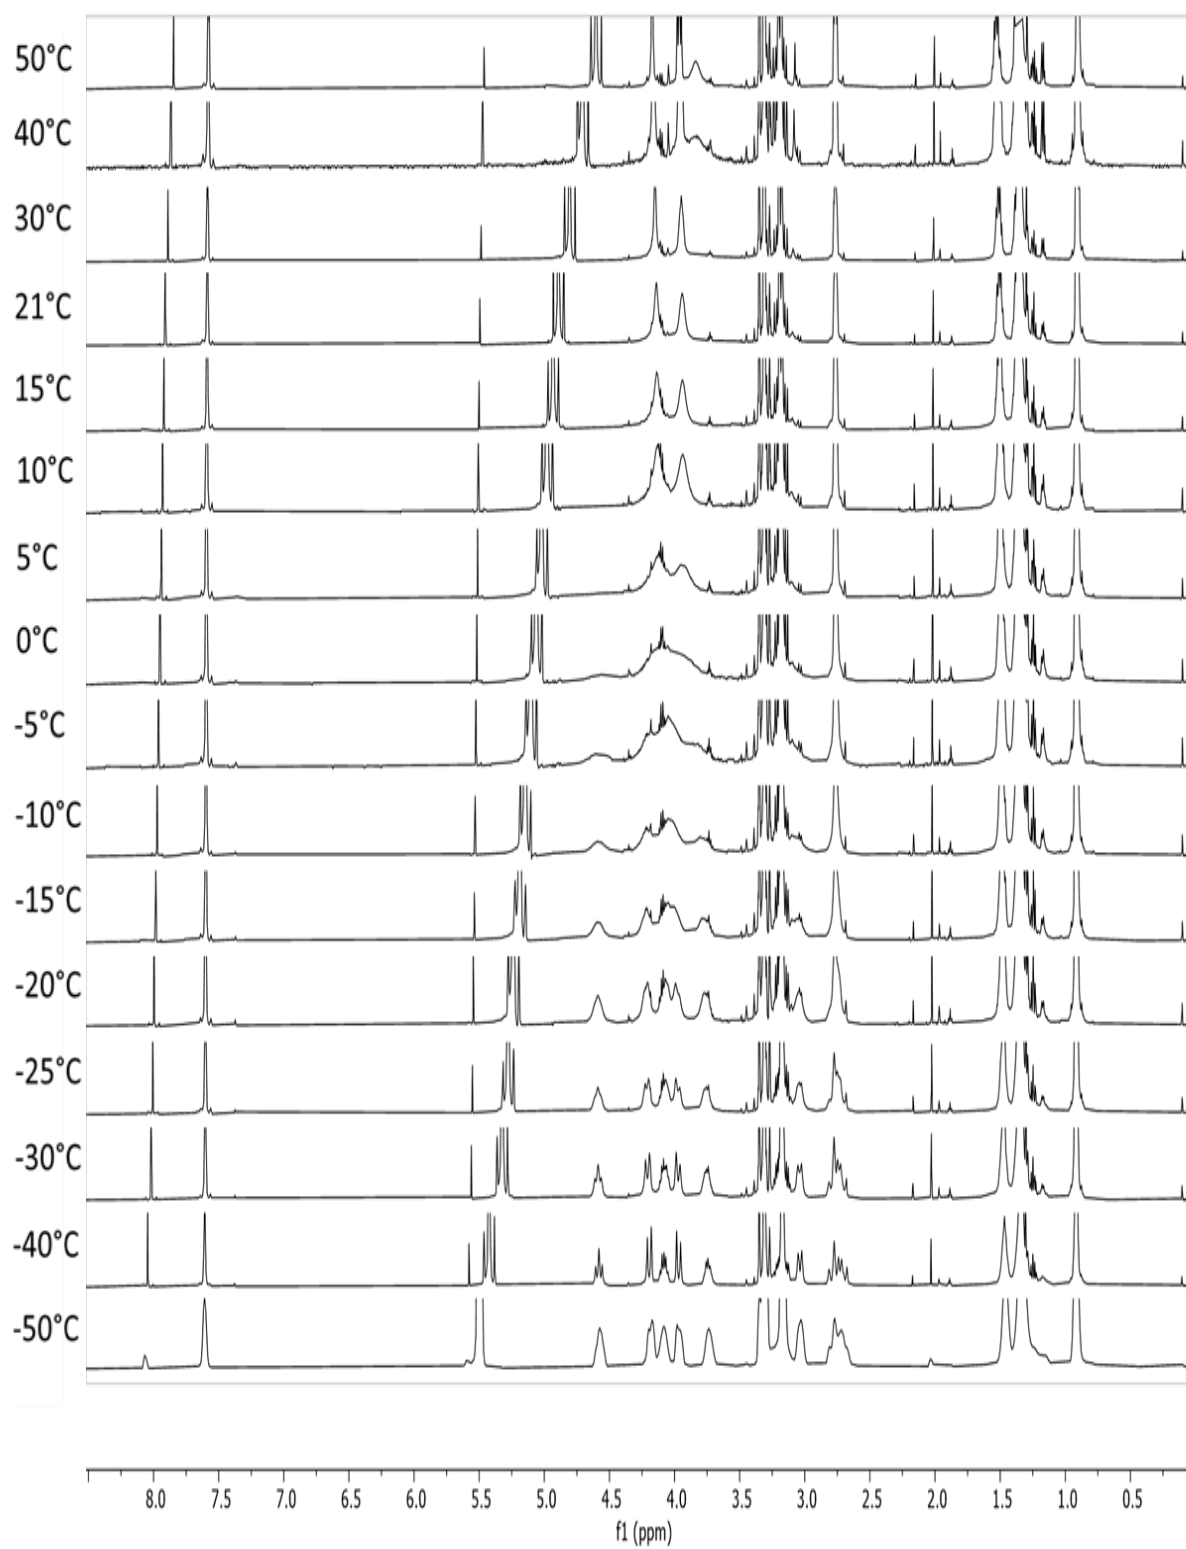

**Figure S30.** Annotated Stacked  $^1\text{H}$  VT-NMR Spectra of  $\text{G}^{\text{NHx}}$ . The resonances corresponding to  $\alpha$  are highlighted with red with a black border. The resonances corresponding to C are highlighted with blue without a border. The resonances corresponding to a are highlighted with green with a dashed border. The inset highlights the temperatures around coalescence for C, with the resonances denoted by blue squares with a black border. The first spectrum post coalescence is denoted with the  $T_c$  in the respective resonance's color.

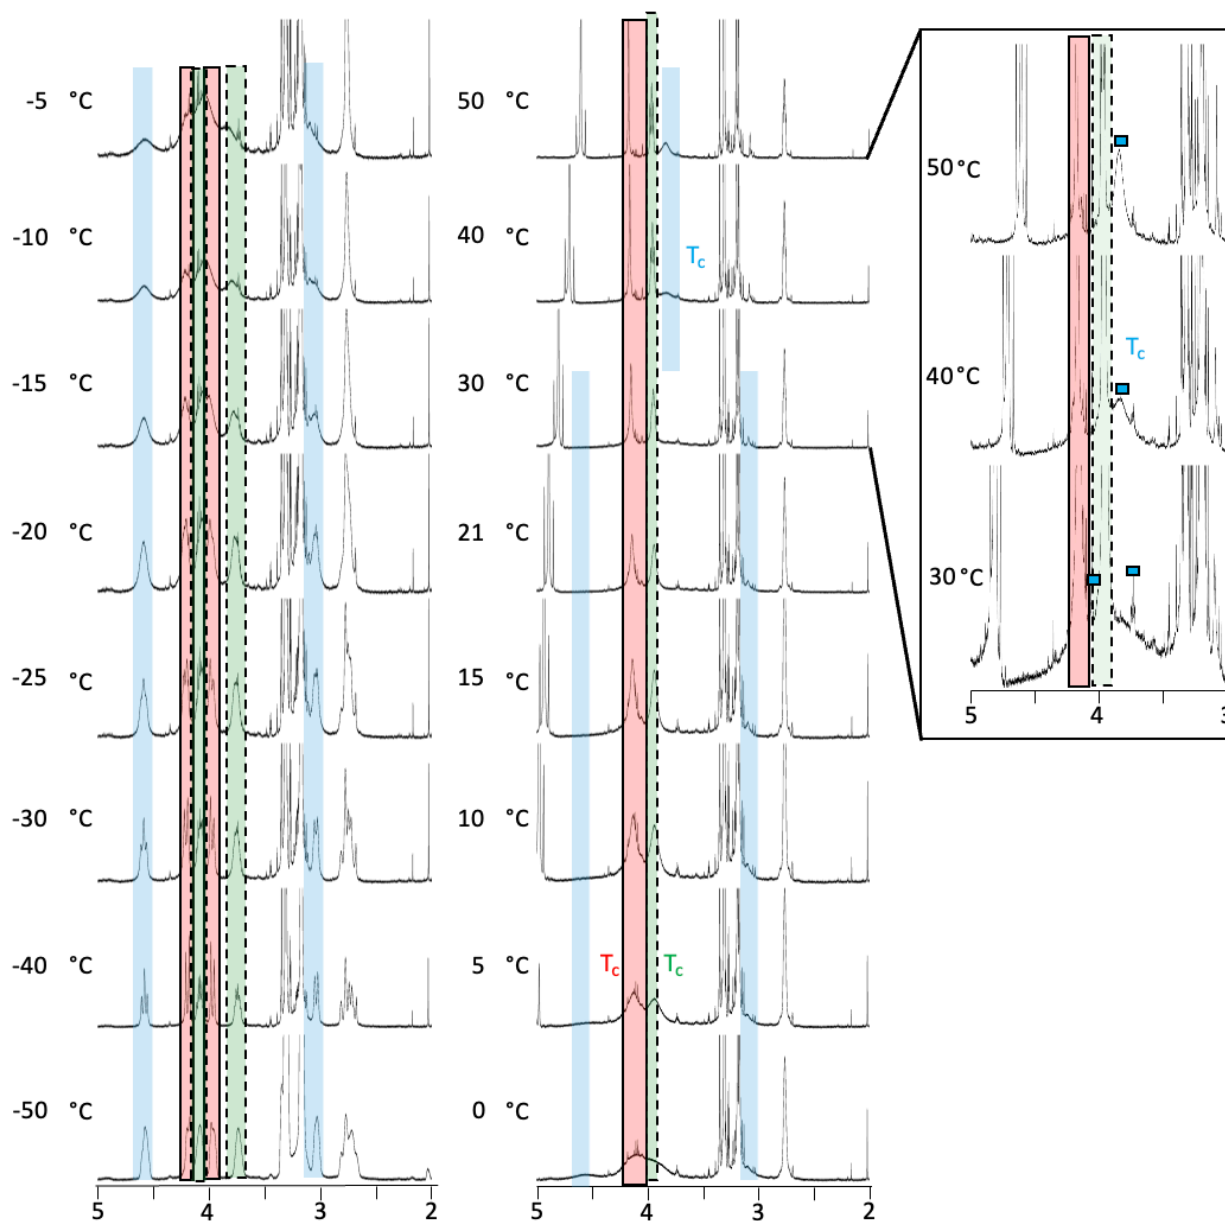

**Figure S31.** Chemical Shift Dependence on Temperature for  $G^{NNHx}$ .

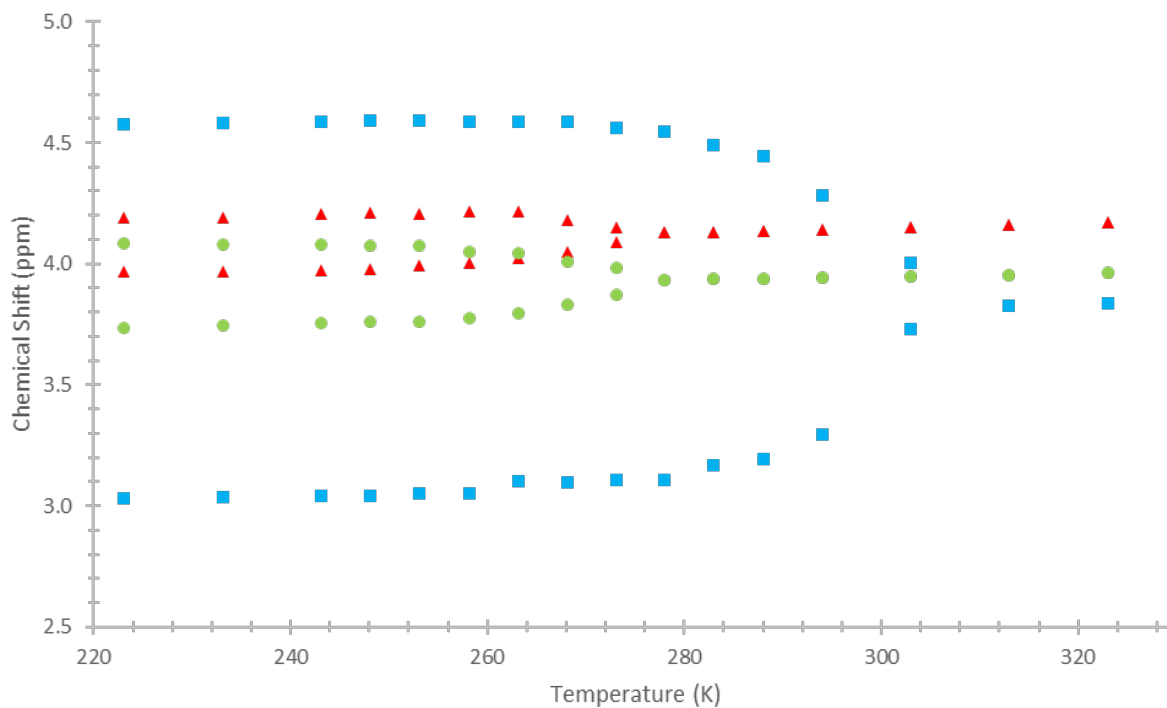

**Figure S32.** Log10 of the Difference in Chemical Shift with Temperature for  $G^{NNHx}$ . Lines are derived from the linear sections of the graph.

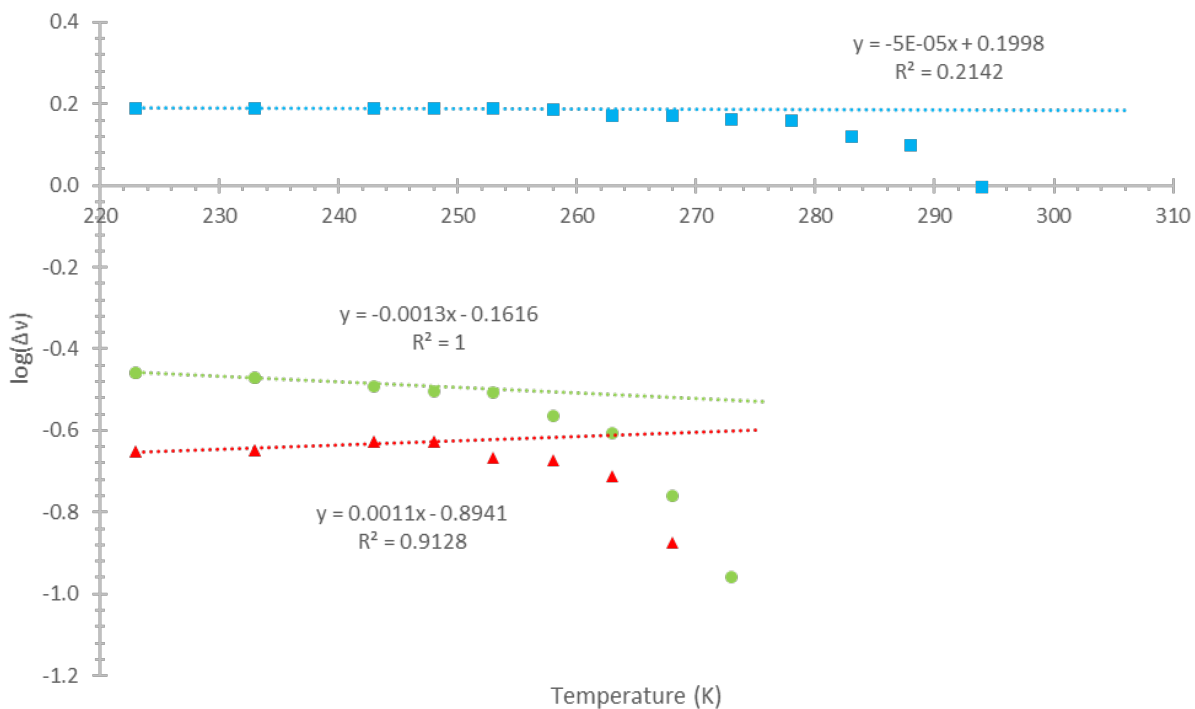

**Table S12.** Chemical Shift and  $\Delta\nu$  Dependence on Temperature for  $G^{NNHx}$ .

| T<br>(K) | $\alpha$                |        |                      |                   | C                       |        |                      |                   | a                       |        |                      |                   |
|----------|-------------------------|--------|----------------------|-------------------|-------------------------|--------|----------------------|-------------------|-------------------------|--------|----------------------|-------------------|
|          | Chemical Shift<br>(ppm) |        | $\Delta\nu$<br>(ppm) | $\log(\Delta\nu)$ | Chemical Shift<br>(ppm) |        | $\Delta\nu$<br>(ppm) | $\log(\Delta\nu)$ | Chemical Shift<br>(ppm) |        | $\Delta\nu$<br>(ppm) | $\log(\Delta\nu)$ |
| 323      | 4.1711                  | 4.1711 | -                    | -                 | 3.8367                  | 3.8367 | -                    | -                 | 3.9635                  | 3.9635 | -                    | -                 |
| 313      | 4.1603                  | 4.1603 | -                    | -                 | 3.8281                  | 3.8281 | -                    | -                 | 3.9554                  | 3.9554 | -                    | -                 |
| 303      | 4.1498                  | 4.1498 | -                    | -                 | 4.0059                  | 3.7278 | 0.2781               | -0.5558           | 3.9480                  | 3.9480 | -                    | -                 |
| 294      | 4.1420                  | 4.1420 | -                    | -                 | 4.2820                  | 3.2930 | 0.9890               | -0.0048           | 3.9430                  | 3.9430 | -                    | -                 |
| 288      | 4.1359                  | 4.1359 | -                    | -                 | 4.4450                  | 3.1945 | 1.2505               | 0.0971            | 3.9400                  | 3.9400 | -                    | -                 |
| 283      | 4.1320                  | 4.1320 | -                    | -                 | 4.4890                  | 3.1683 | 1.3207               | 0.1208            | 3.9366                  | 3.9366 | -                    | -                 |
| 278      | 4.1280                  | 4.1280 | -                    | -                 | 4.5440                  | 3.1080 | 1.4360               | 0.1572            | 3.9330                  | 3.9330 | -                    | -                 |
| 273      | 4.1513                  | 4.0898 | -                    | -                 | 4.5590                  | 3.1070 | 1.4520               | 0.1620            | 3.9810                  | 3.8710 | 0.1100               | -0.9586           |
| 268      | 4.1821                  | 4.0490 | 0.1331               | -0.8758           | 4.5840                  | 3.0980 | 1.4860               | 0.1720            | 4.0071                  | 3.8330 | 0.1741               | -0.7592           |
| 263      | 4.2180                  | 4.0232 | 0.1948               | -0.7104           | 4.5850                  | 3.1000 | 1.4850               | 0.1717            | 4.0430                  | 3.7952 | 0.2478               | -0.6059           |
| 258      | 4.2170                  | 4.0040 | 0.2130               | -0.6716           | 4.5870                  | 3.0507 | 1.5363               | 0.1865            | 4.0500                  | 3.7770 | 0.2730               | -0.5638           |
| 253      | 4.2084                  | 3.9927 | 0.2157               | -0.6661           | 4.5920                  | 3.0520 | 1.5400               | 0.1875            | 4.0730                  | 3.7618 | 0.3112               | -0.5070           |
| 248      | 4.2116                  | 3.9760 | 0.2356               | -0.6278           | 4.5890                  | 3.0410 | 1.5480               | 0.1898            | 4.0730                  | 3.7590 | 0.3140               | -0.5031           |
| 243      | 4.2074                  | 3.9723 | 0.2351               | -0.6288           | 4.5880                  | 3.0398 | 1.5482               | 0.1898            | 4.0780                  | 3.7556 | 0.3224               | -0.4916           |
| 233      | 4.1934                  | 3.9685 | 0.2250               | -0.6479           | 4.5801                  | 3.0371 | 1.5431               | 0.1884            | 4.0809                  | 3.7432 | 0.3377               | -0.4715           |
| 223      | 4.1890                  | 3.9660 | 0.2230               | -0.6517           | 4.5741                  | 3.0294 | 1.5447               | 0.1888            | 4.0830                  | 3.7348 | 0.3482               | -0.4582           |

**Table S13.** Relevant Variables for the Determination of  $\Delta G^\ddagger$  for  $G^{NNHx}$ .

|          | $T_c$<br>(K) | $\log(\Delta\nu)$ | $\Delta\nu@T_c$ (ppm) | k<br>(MHz) | $\Delta G^\ddagger$ (kcal/mol) |
|----------|--------------|-------------------|-----------------------|------------|--------------------------------|
| $\alpha$ | 275.5        | -0.5973           | 0.2527                | 280.7      | 13.00                          |
| C        | 308          | 0.1855            | 1.533                 | 1702.4     | 13.50                          |
| a        | 275.5        | -0.5280           | 0.2965                | 329.3      | 12.91                          |
|          |              |                   |                       | Average    | 13.13                          |



**Figure S33.** DNMR Traces for  $\alpha$  and the Respective Fit for C for  $G^{NNH^x}$ . The original spectra are shown in black, while the simulated spectra are shown in green or mauve.

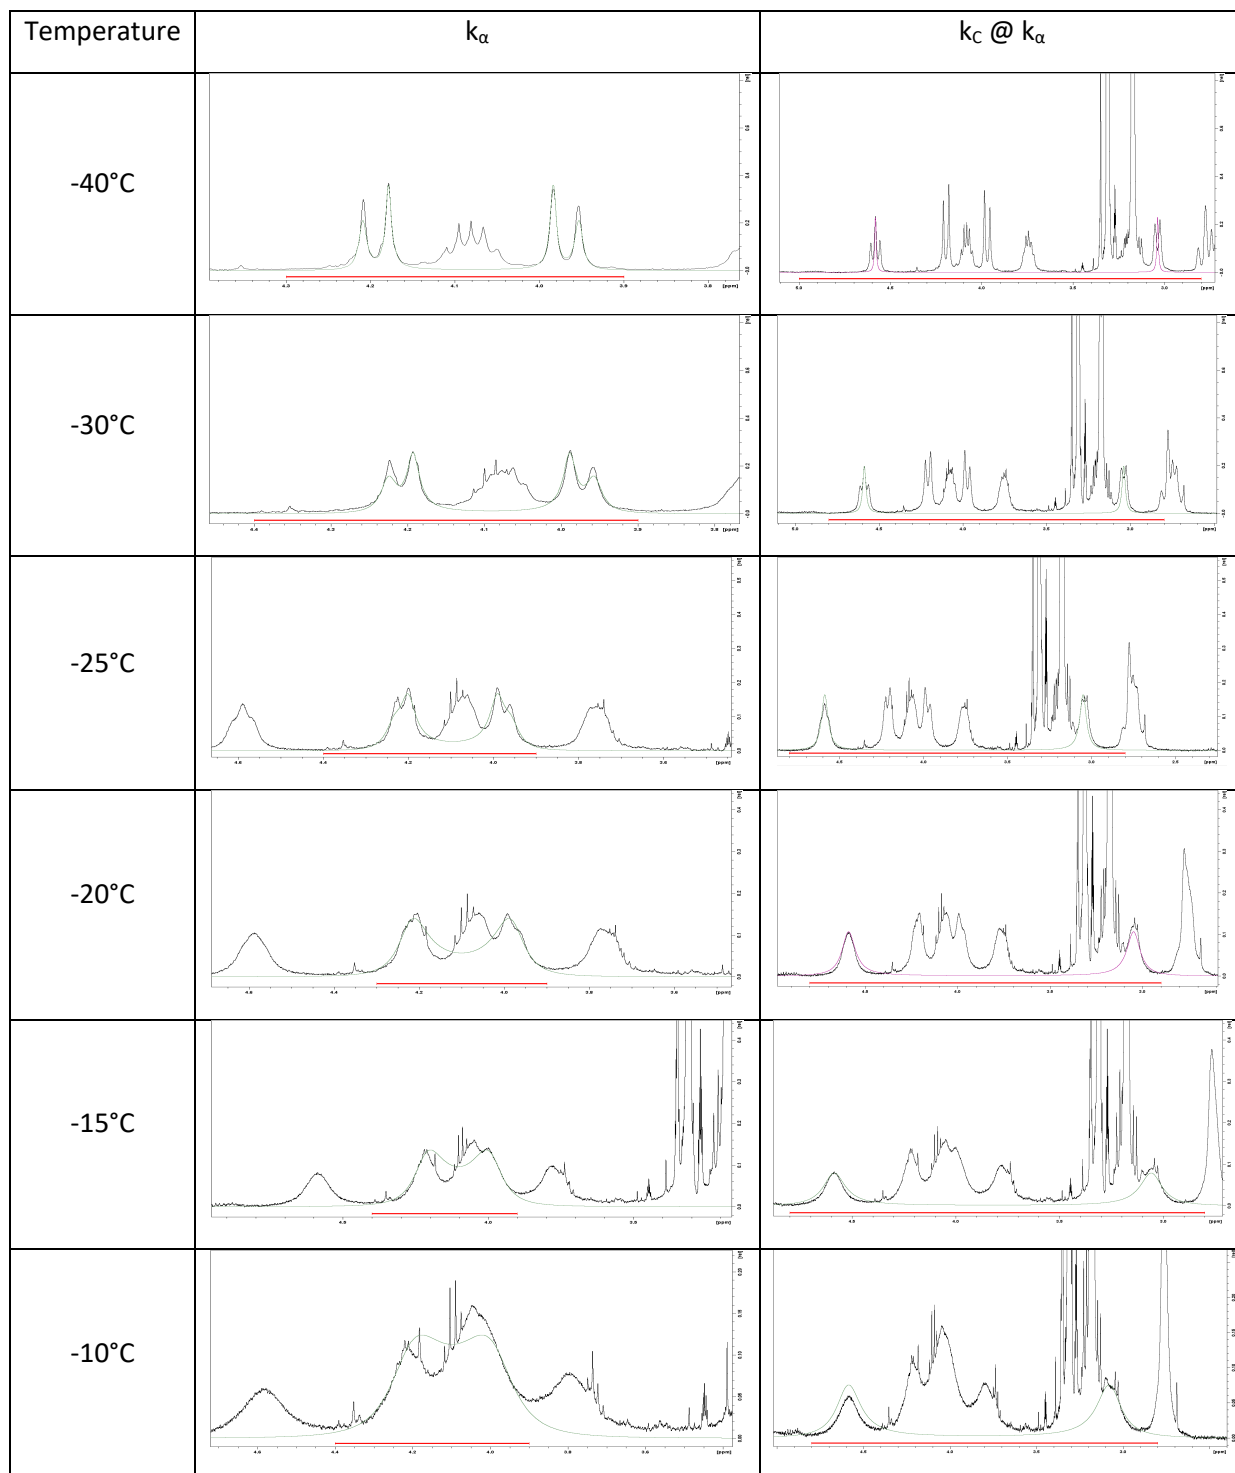

**Figure S34.** Thermodynamics Derived from DNMR for the  $\alpha$  Resonance of  $\mathbf{G}^{\text{NHx}}$ . a) Temperature dependent rate constant for the selected temperatures. b) Enthalpy, entropy, and free energy calculated from the Arrhenius and Eyring plots. c) The Arrhenius plot for  $\alpha$ . d) The Eyring plot for  $\alpha$ .

| a) | T (°C) | T (K)  | 1/T     | K        | ln(k) | ln(k/T) |
|----|--------|--------|---------|----------|-------|---------|
|    | -40    | 233.15 | 0.00429 | 15.3783  | 2.733 | -2.719  |
|    | -30    | 243.15 | 0.00411 | 30.3078  | 3.411 | -2.082  |
|    | -25    | 248.15 | 0.00403 | 73.0843  | 4.292 | -1.222  |
|    | -20    | 253.15 | 0.00395 | 135.1340 | 4.906 | -0.628  |
|    | -15    | 258.15 | 0.00387 | 170.0070 | 5.136 | -0.418  |
|    | -10    | 263.15 | 0.00380 | 234.0780 | 5.456 | -0.117  |

| b) | Method         | $\Delta H^\ddagger$ | $\Delta S^\ddagger$ | $\Delta G^\ddagger$ |
|----|----------------|---------------------|---------------------|---------------------|
|    | ln(k) vs 1/T   | 11.26               | -0.0063             | 13.00               |
|    | ln(k/T) vs 1/T | 11.32               | -0.0042             | 12.48               |

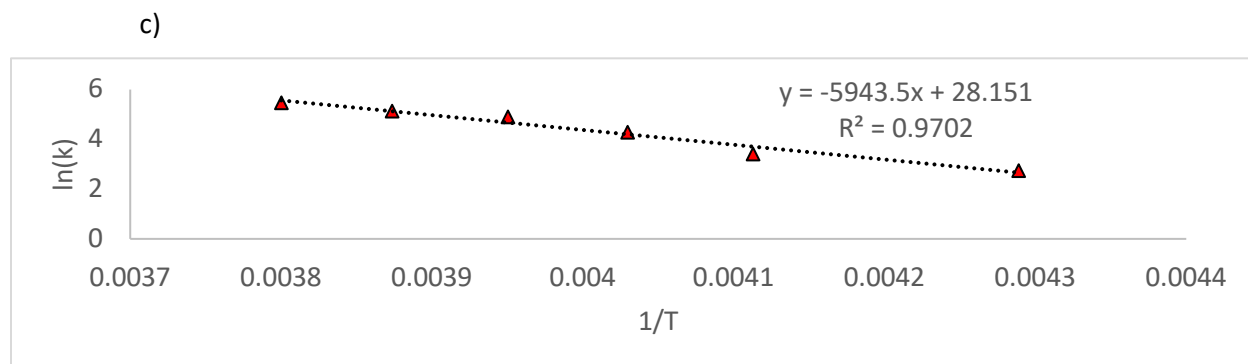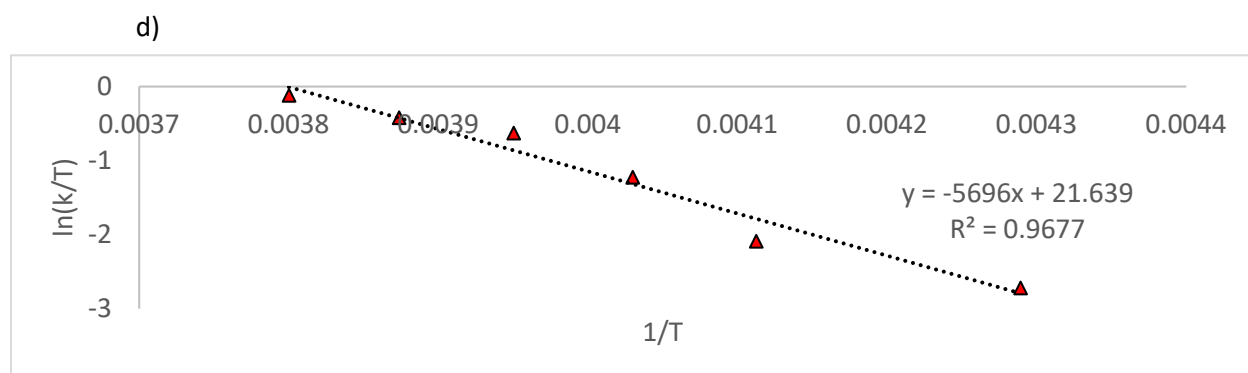

**Figure S35.** DNMR Traces for a and the Respective Fit for C for  $G^{NNH^x}$ . The original spectra are shown in black, while the simulated spectra are shown in green or mauve.

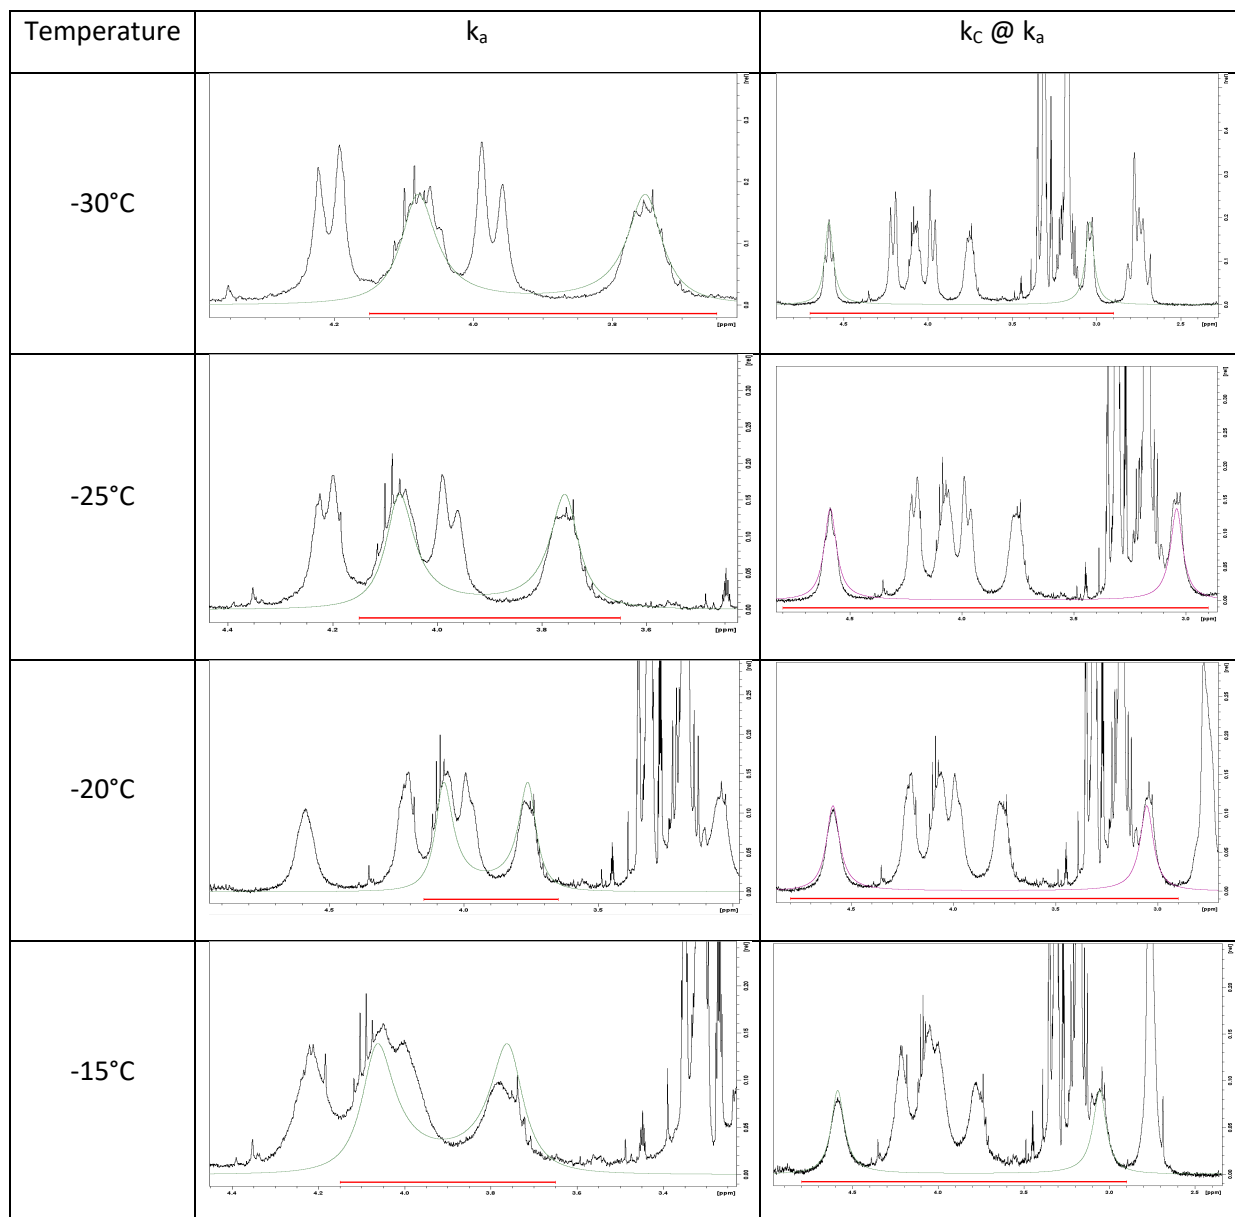

**Figure S36.** Thermodynamics Derived from DNMR for the a Resonance of  $G^{NNHx}$ . a) Temperature dependent rate constant for the selected temperatures. b) Enthalpy, entropy, and free energy calculated from the Arrhenius and Eyring plots. c) The Arrhenius plot for a. d) The Eyring plot for a.

| a) | T (°C) | T (K)  | 1/T     | K        | ln(k) | ln(k/T) |
|----|--------|--------|---------|----------|-------|---------|
|    | -30    | 243.15 | 0.00411 | 63.4480  | 4.150 | -1.343  |
|    | -25    | 248.15 | 0.00403 | 71.6596  | 4.272 | -1.242  |
|    | -20    | 253.15 | 0.00395 | 91.6751  | 4.518 | -1.016  |
|    | -15    | 258.15 | 0.00387 | 113.6920 | 4.733 | -0.820  |

| b) | Method         | $\Delta H^\ddagger$ | $\Delta S^\ddagger$ | $\Delta G^\ddagger$ |
|----|----------------|---------------------|---------------------|---------------------|
|    | ln(k) vs 1/T   | 4.42                | -0.031              | 12.91               |
|    | ln(k/T) vs 1/T | 4.47                | -0.032              | 13.17               |

c)

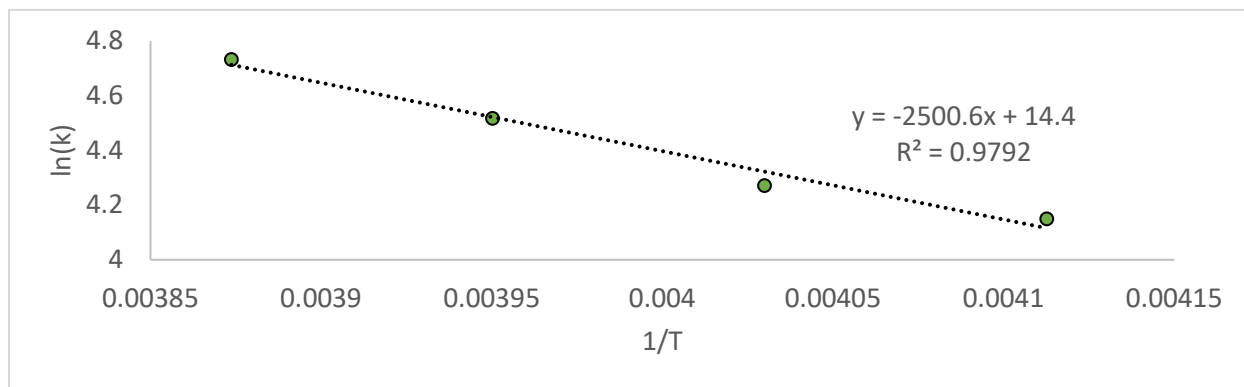

d)

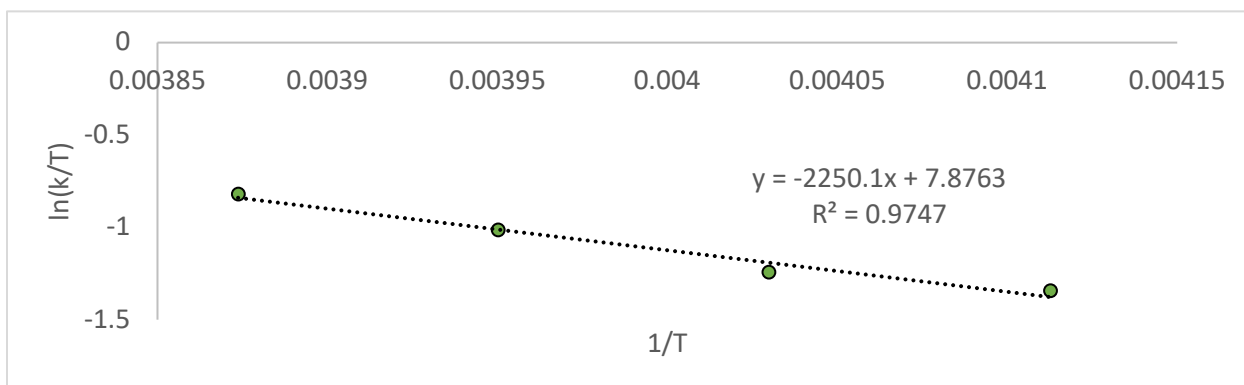

Figure S37. The 400 MHz  $^1\text{H}$  NMR Spectrum of  $\text{G}^{\text{NMe}}$  in DMSO.

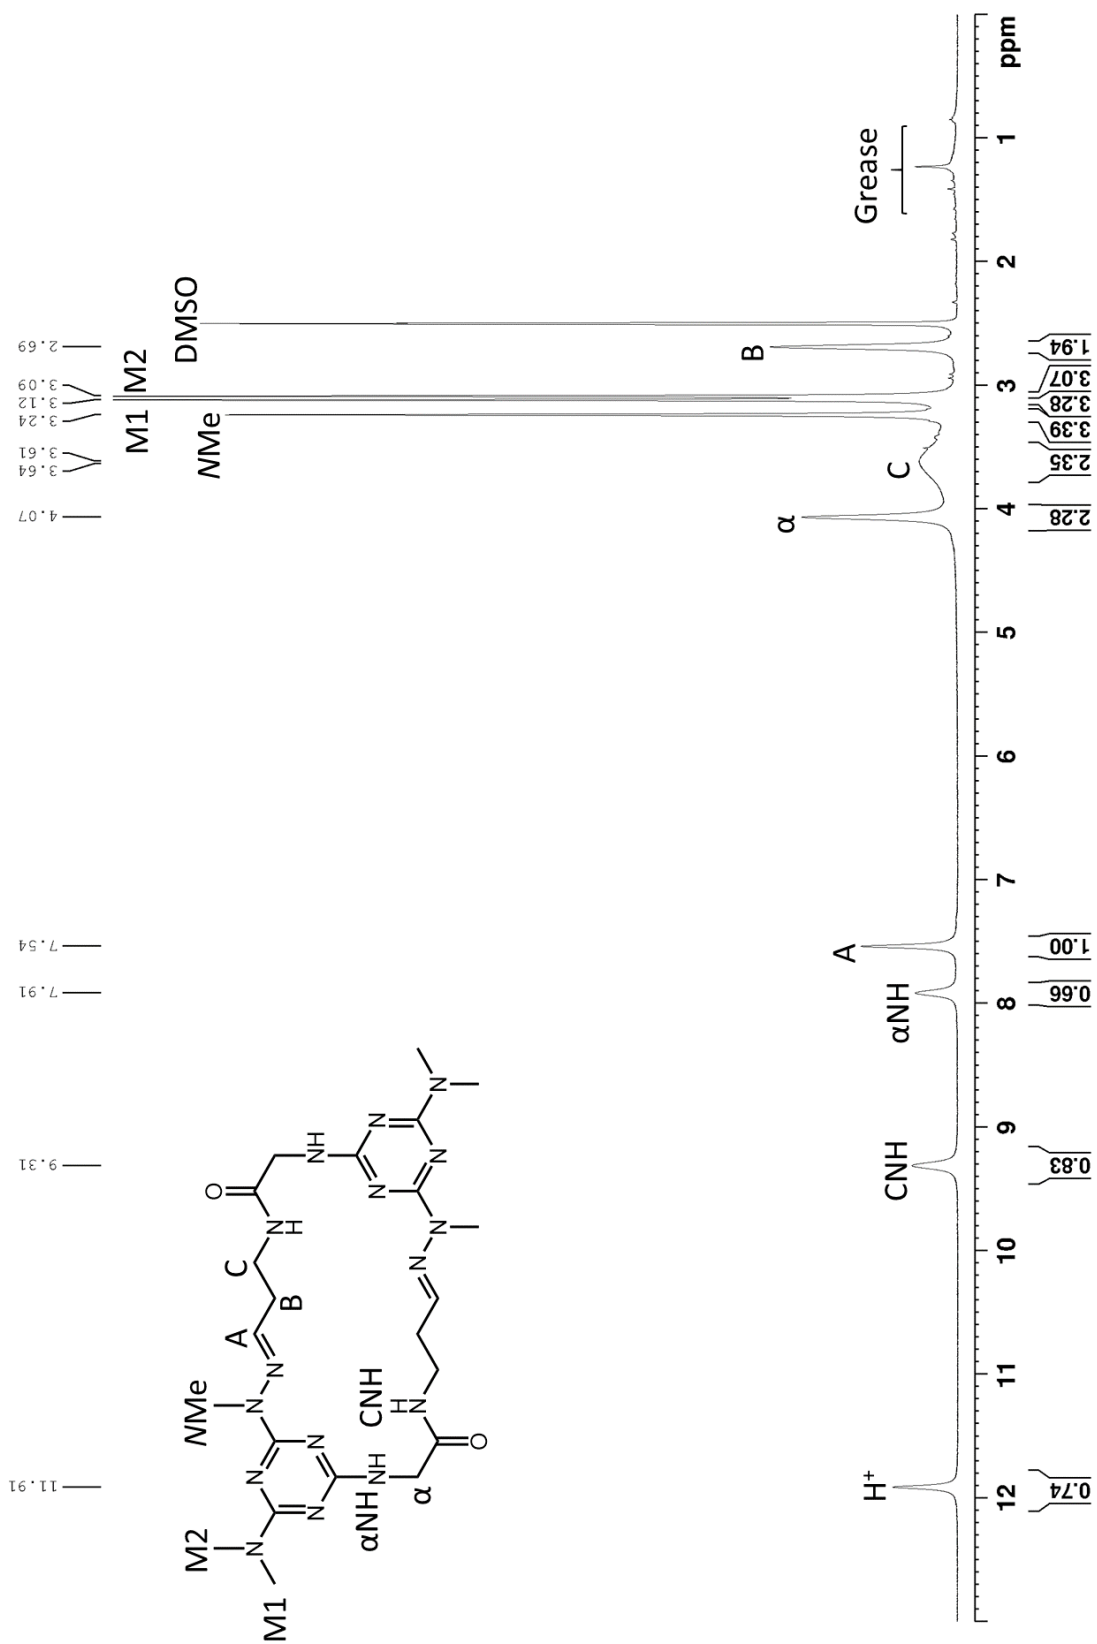

Figure S38. The 400 MHz  $^1\text{H}$  NMR Spectrum of  $\text{G}^{\text{NNet}}$  in DMSO.

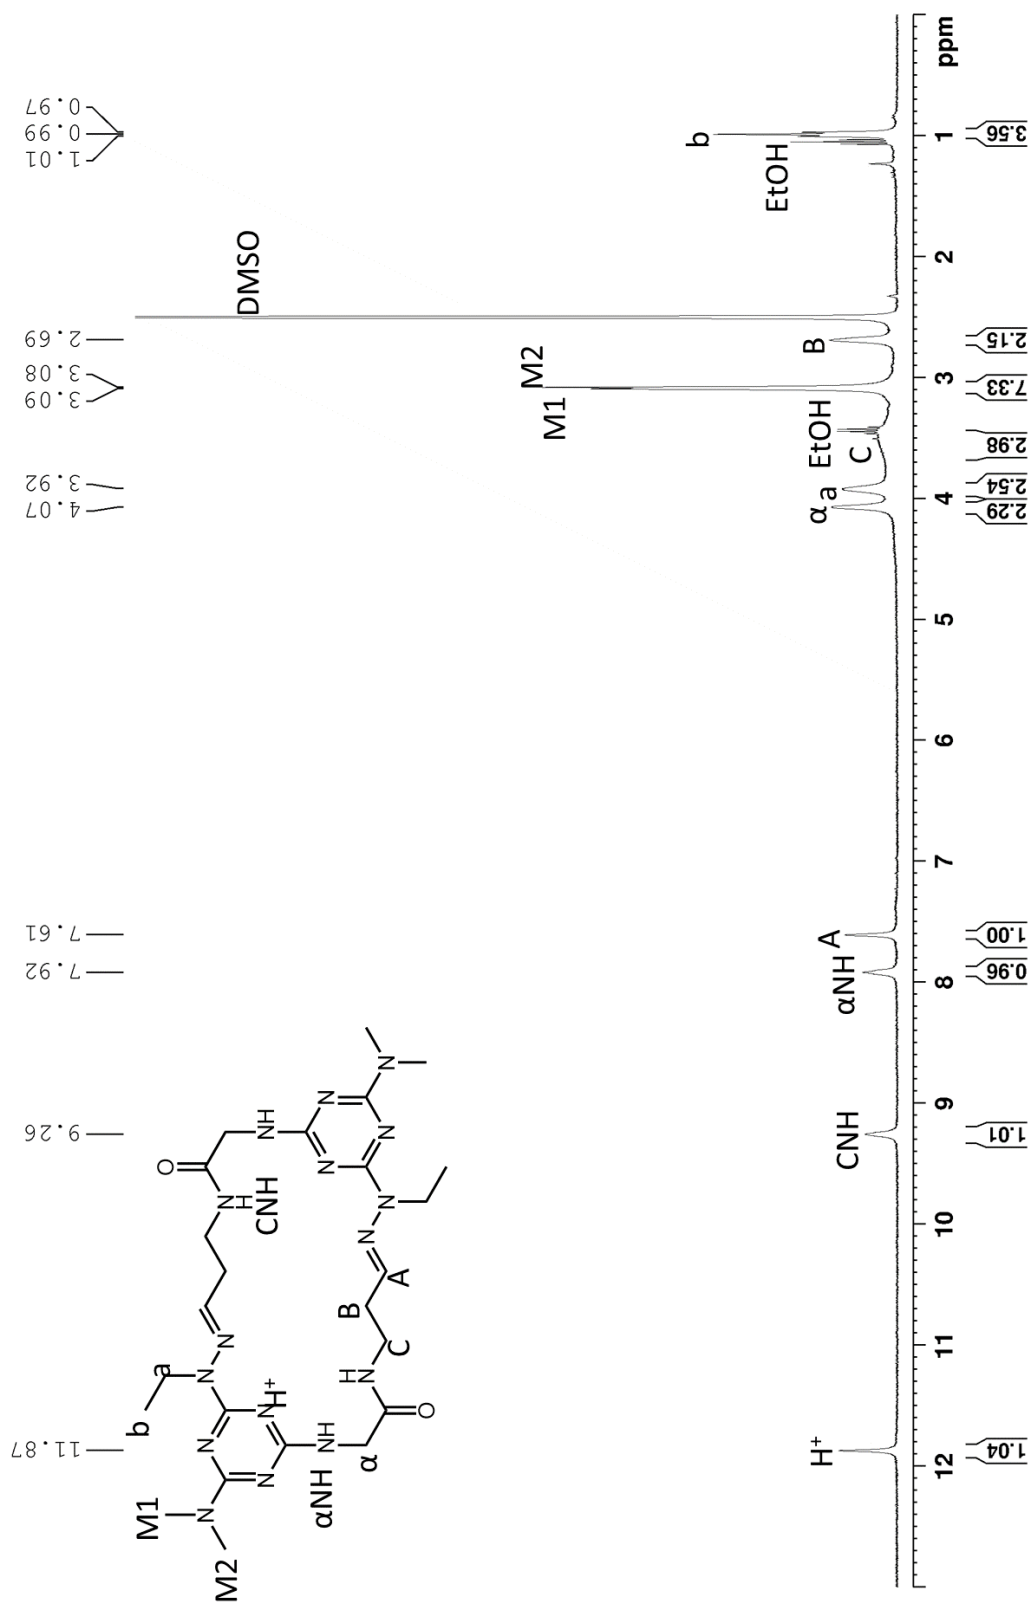

Figure S39. The 400 MHz  $^1\text{H}$  NMR Spectrum of  $\text{G}^{\text{NNiPr}}$  in DMSO.

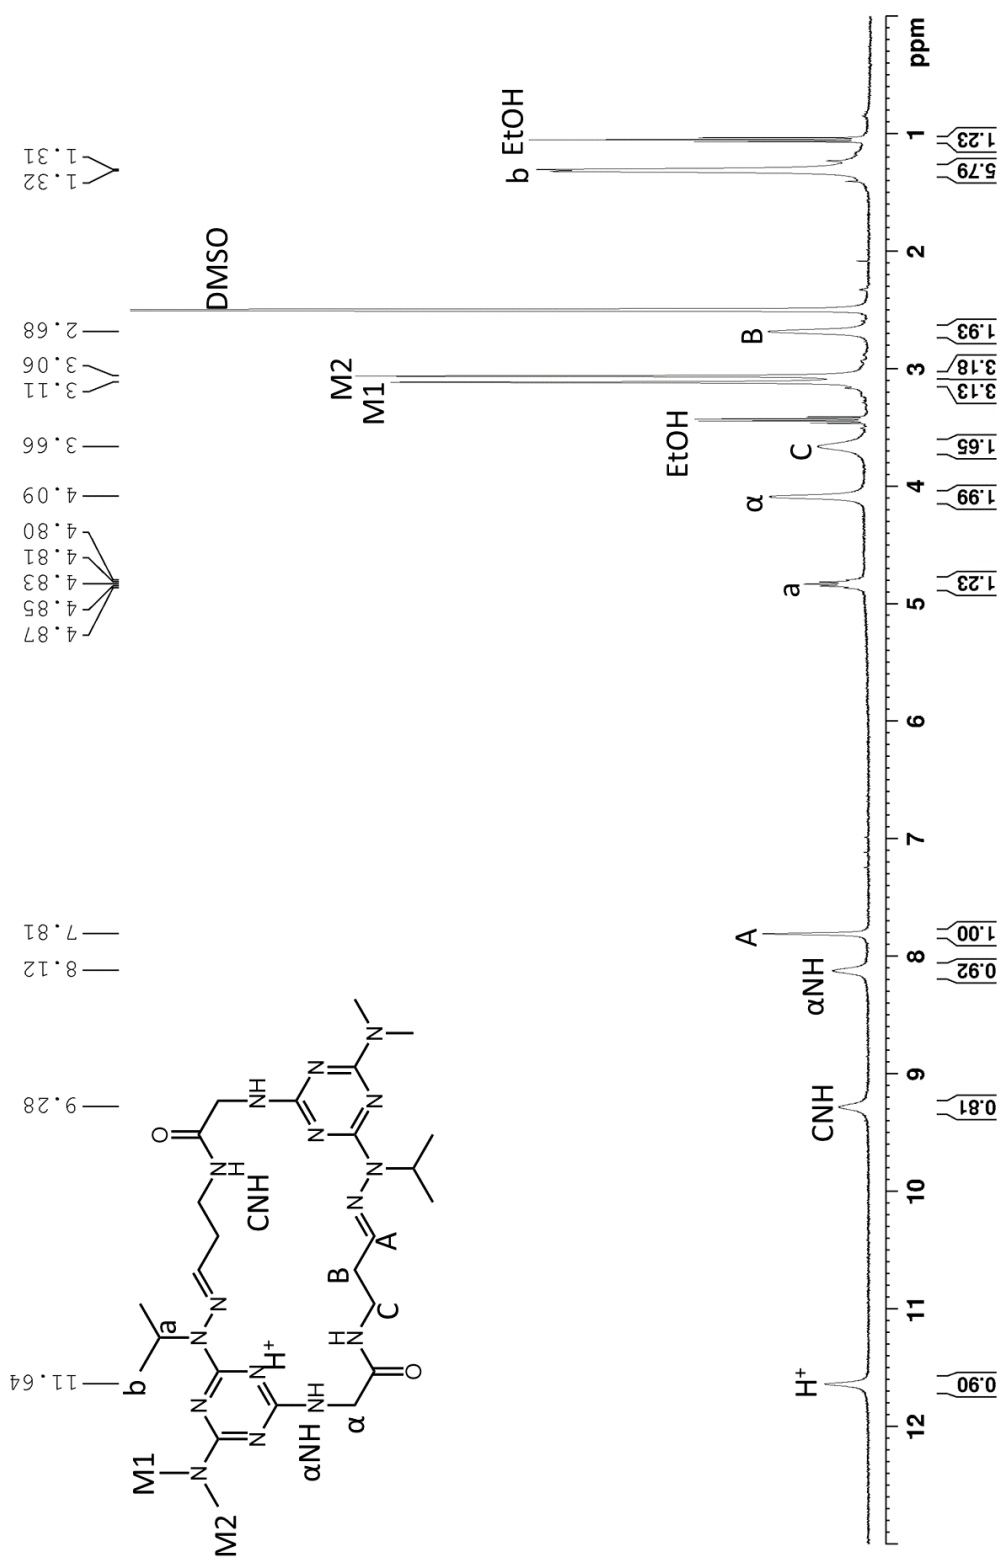

Figure S40. The 400 MHz  $^1\text{H}$  NMR Spectrum of  $\text{G}^{\text{NNBn}}$  in DMSO.

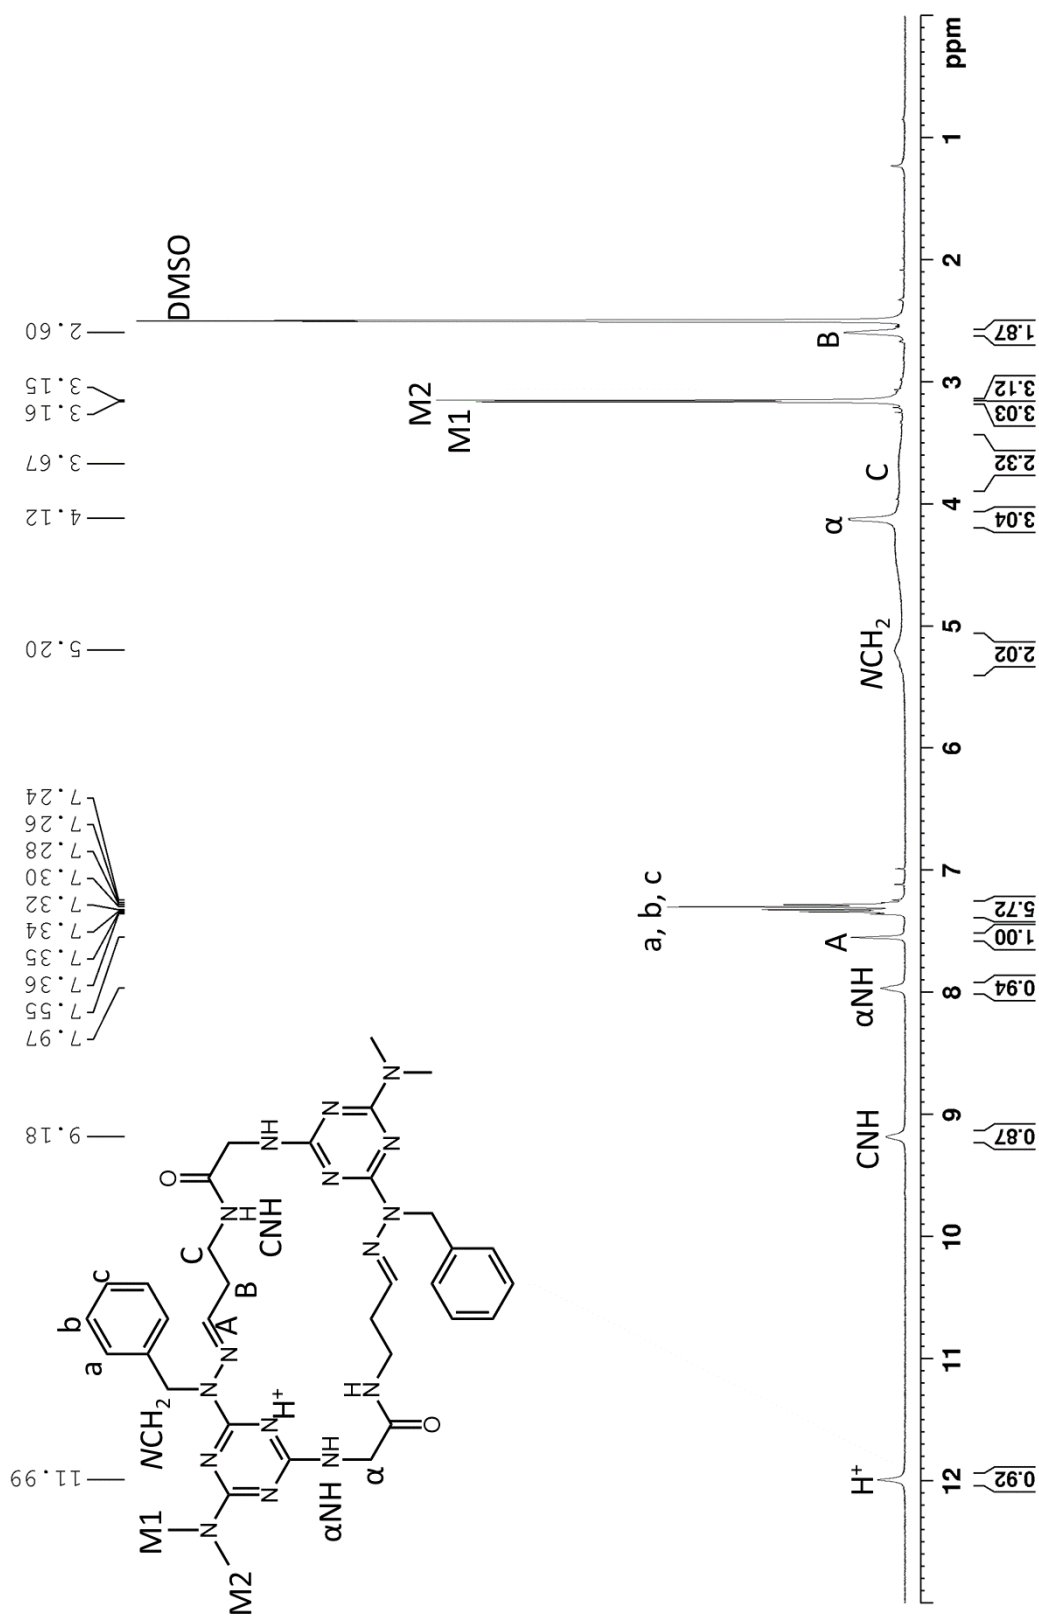



Figure S41. The 400 MHz  $^1\text{H}$  NMR Spectrum of  $\text{G}^{\text{NNHx}}$  in DMSO.

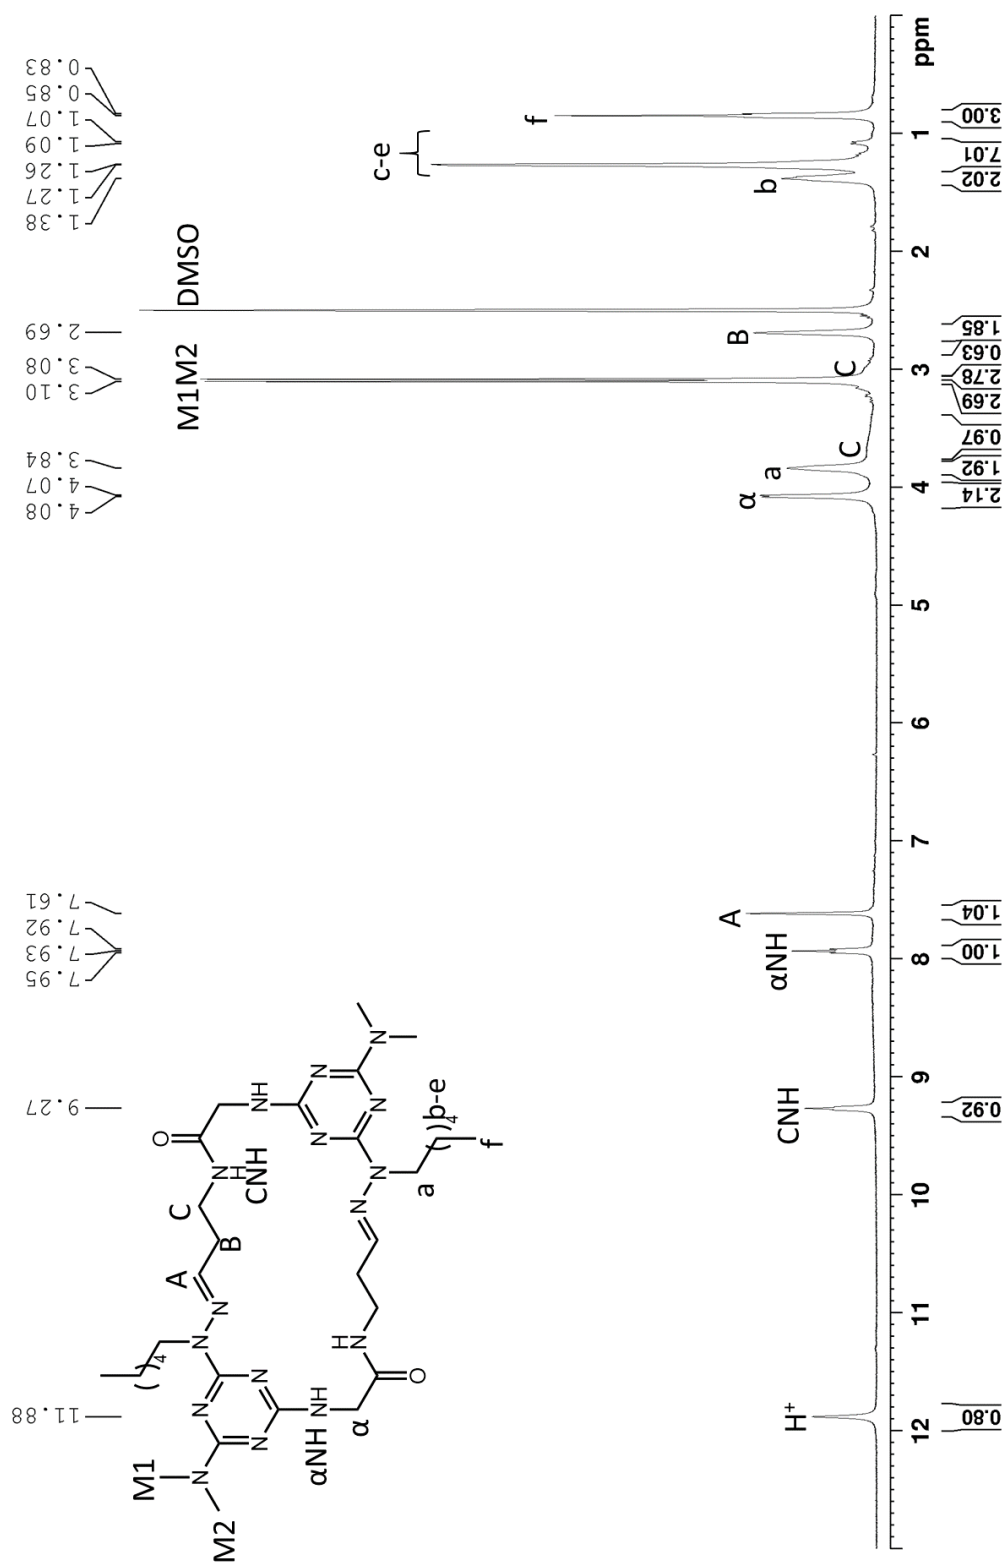

Figure S42. The 100 MHz  $^{13}\text{C}$  NMR Spectrum of  $\text{G}^{\text{NMe}}$  in DMSO.

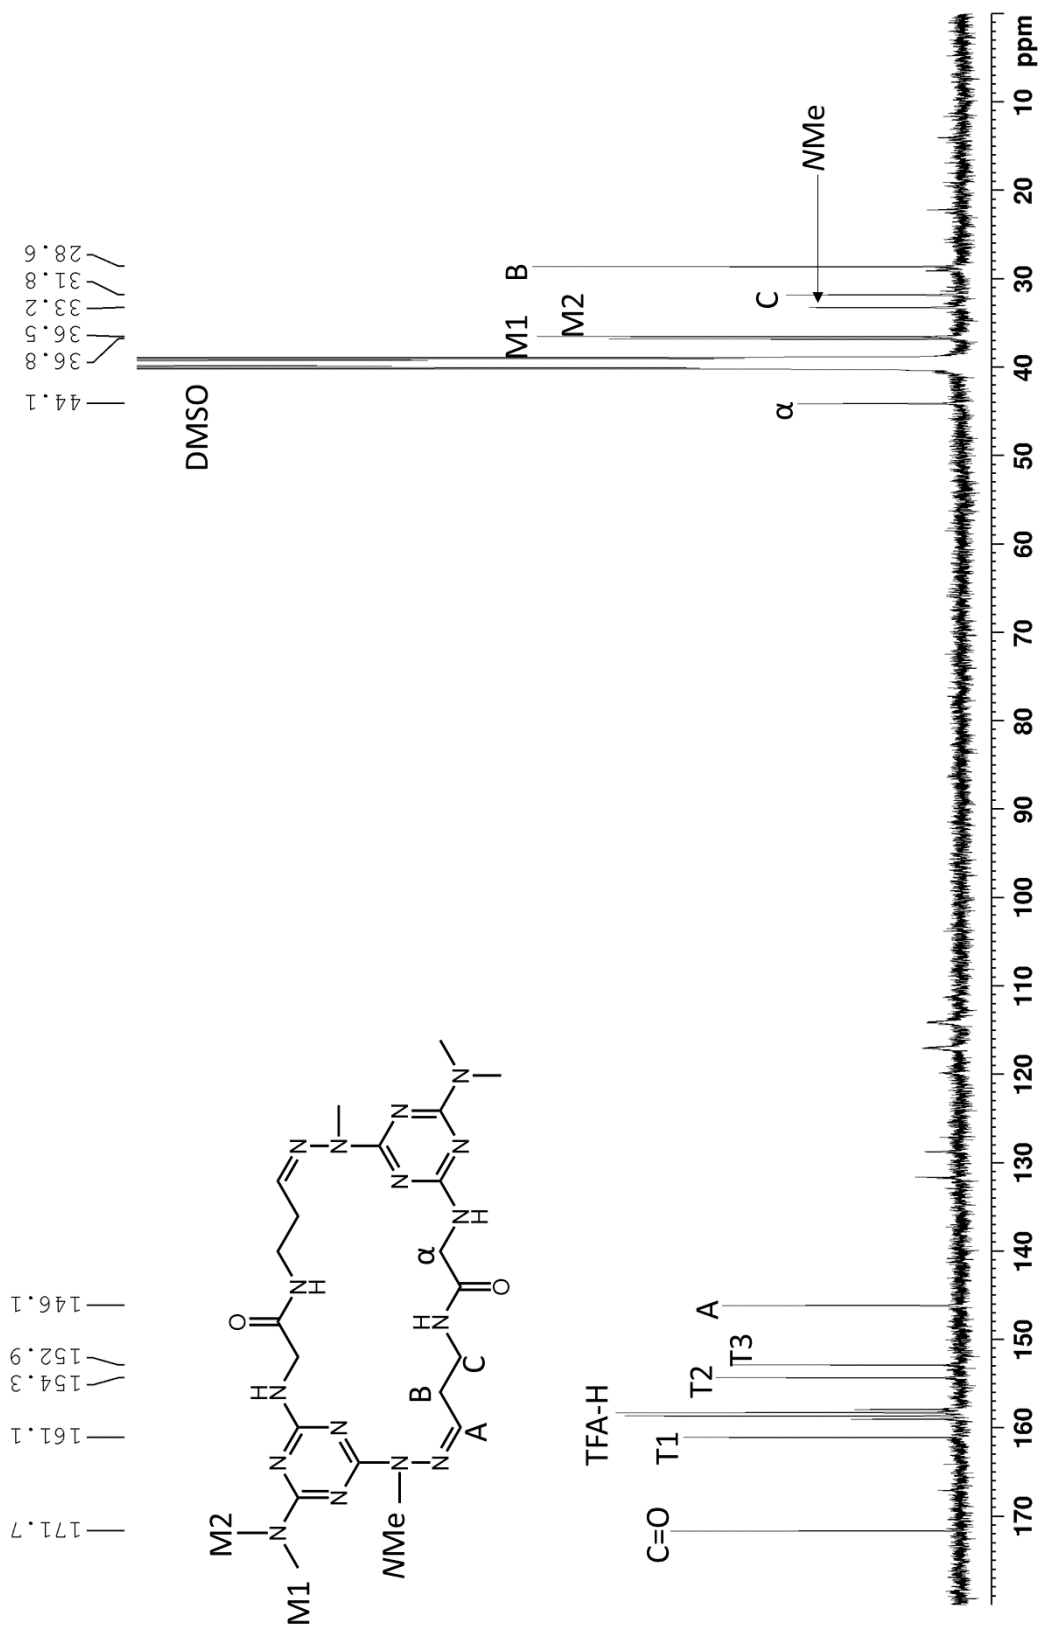

Figure S43. The 100 MHz  $^{13}\text{C}$  NMR Spectrum of  $\text{G}^{\text{NNEt}}$  in DMSO.

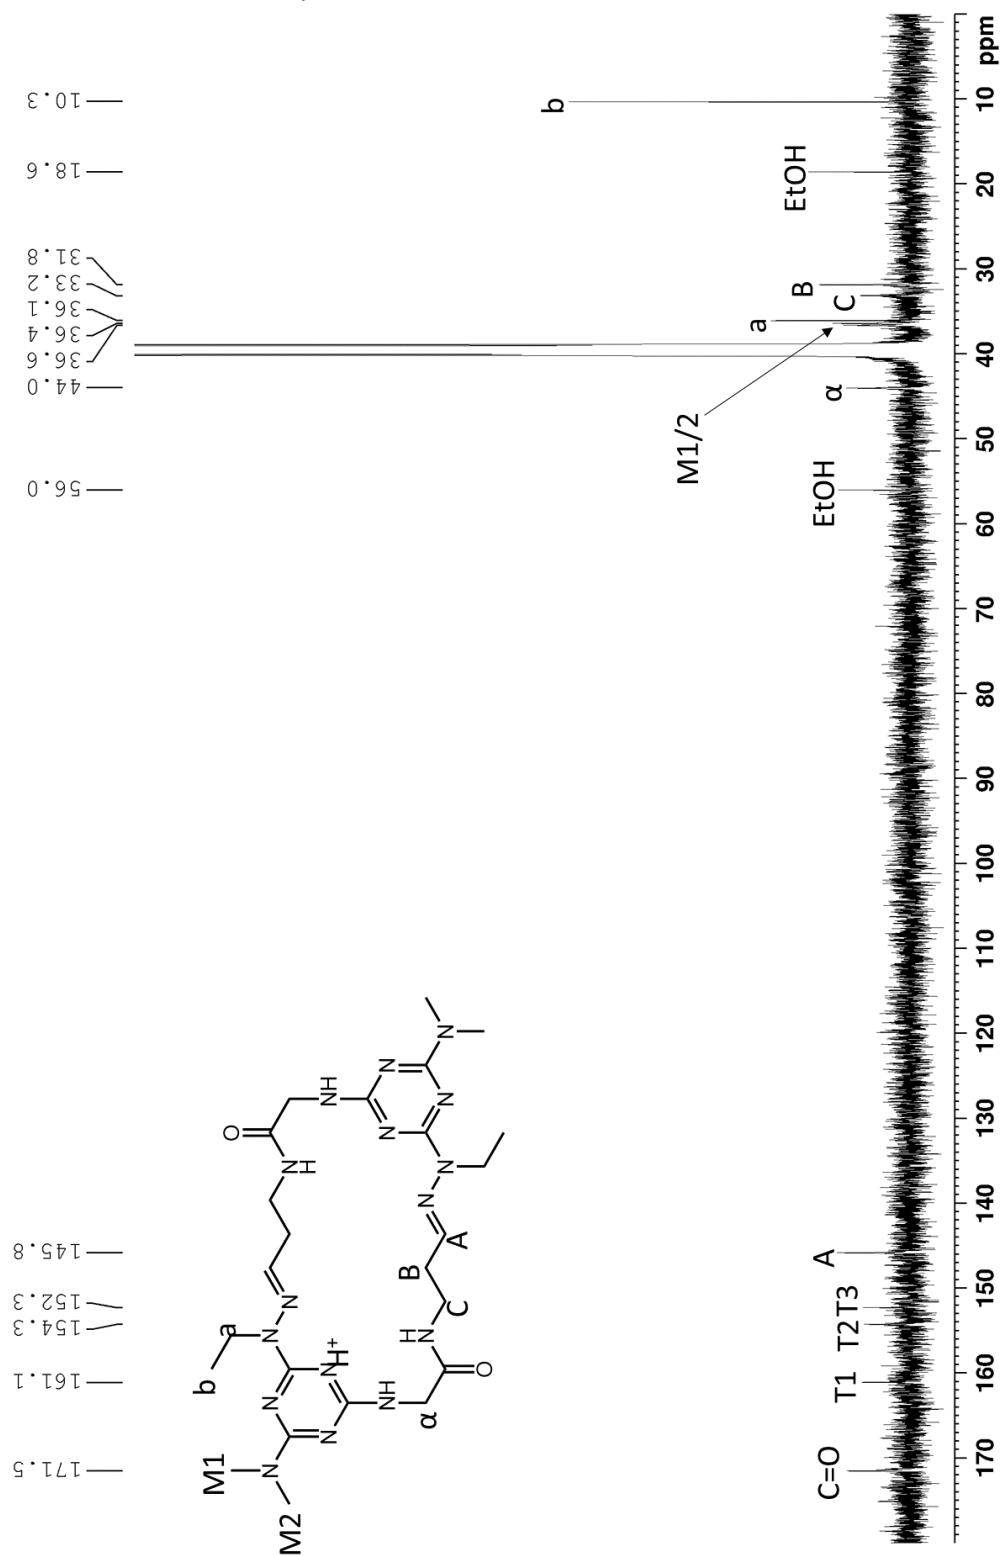

Figure S44. The 100 MHz  $^{13}\text{C}$  NMR Spectrum of  $\text{G}^{\text{NNiPr}}$  in DMSO.

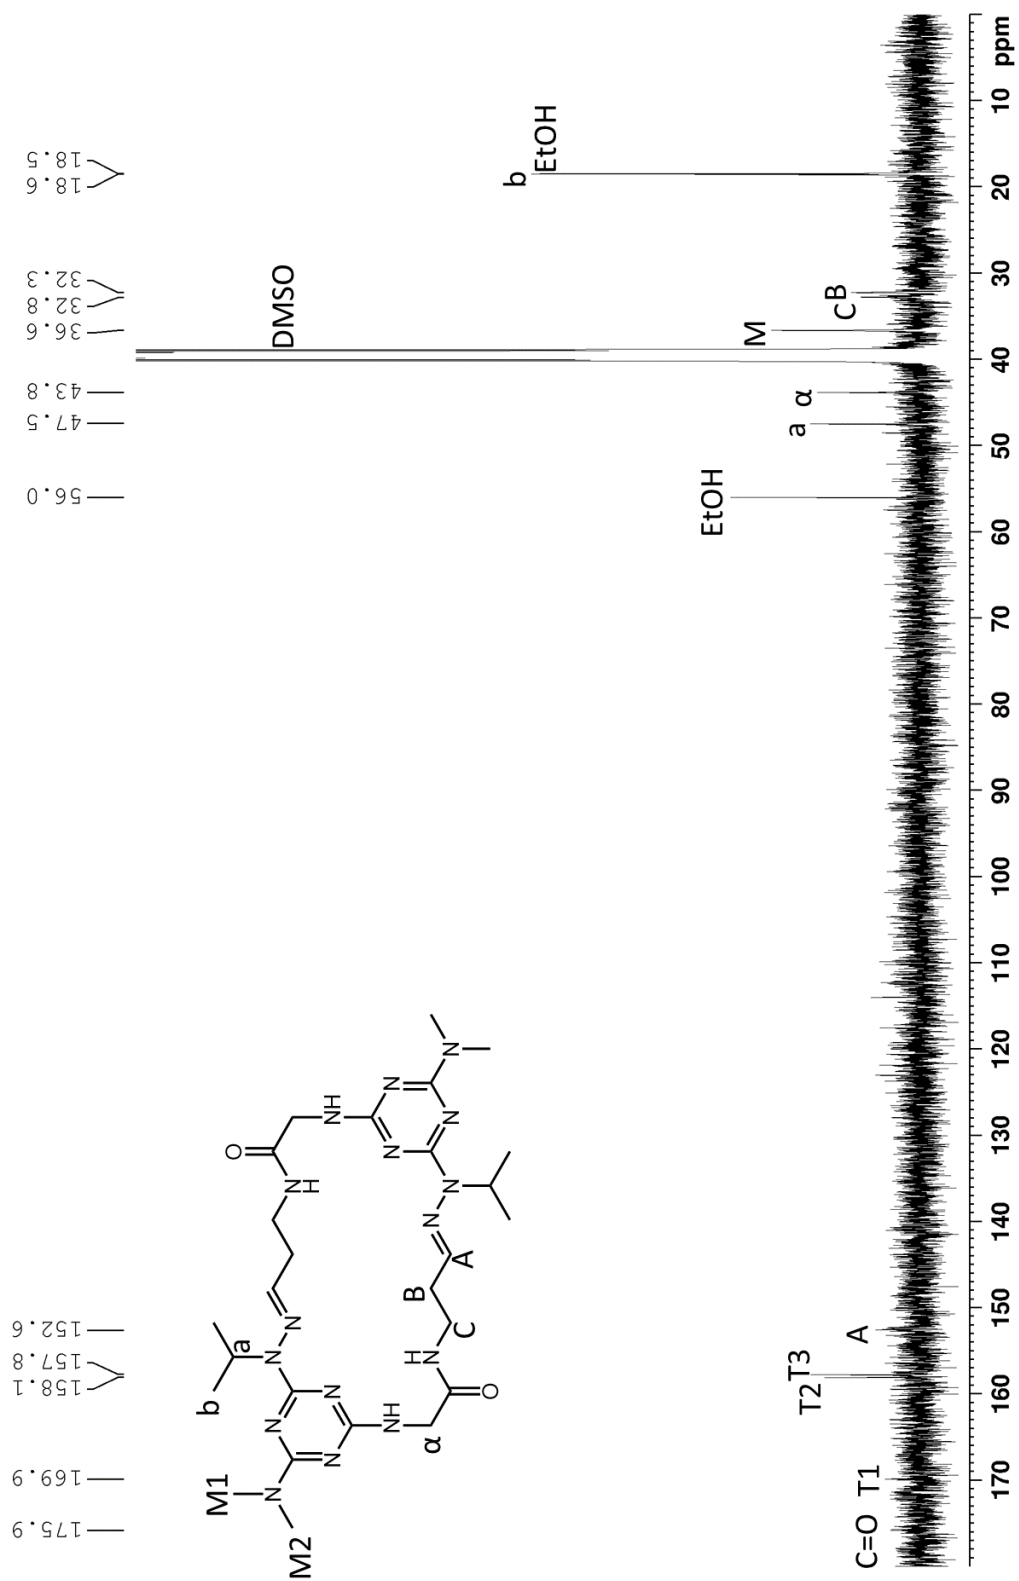

Figure S45. The 100 MHz  $^{13}\text{C}$  NMR Spectrum of  $\text{G}^{\text{NNBn}}$  in DMSO.

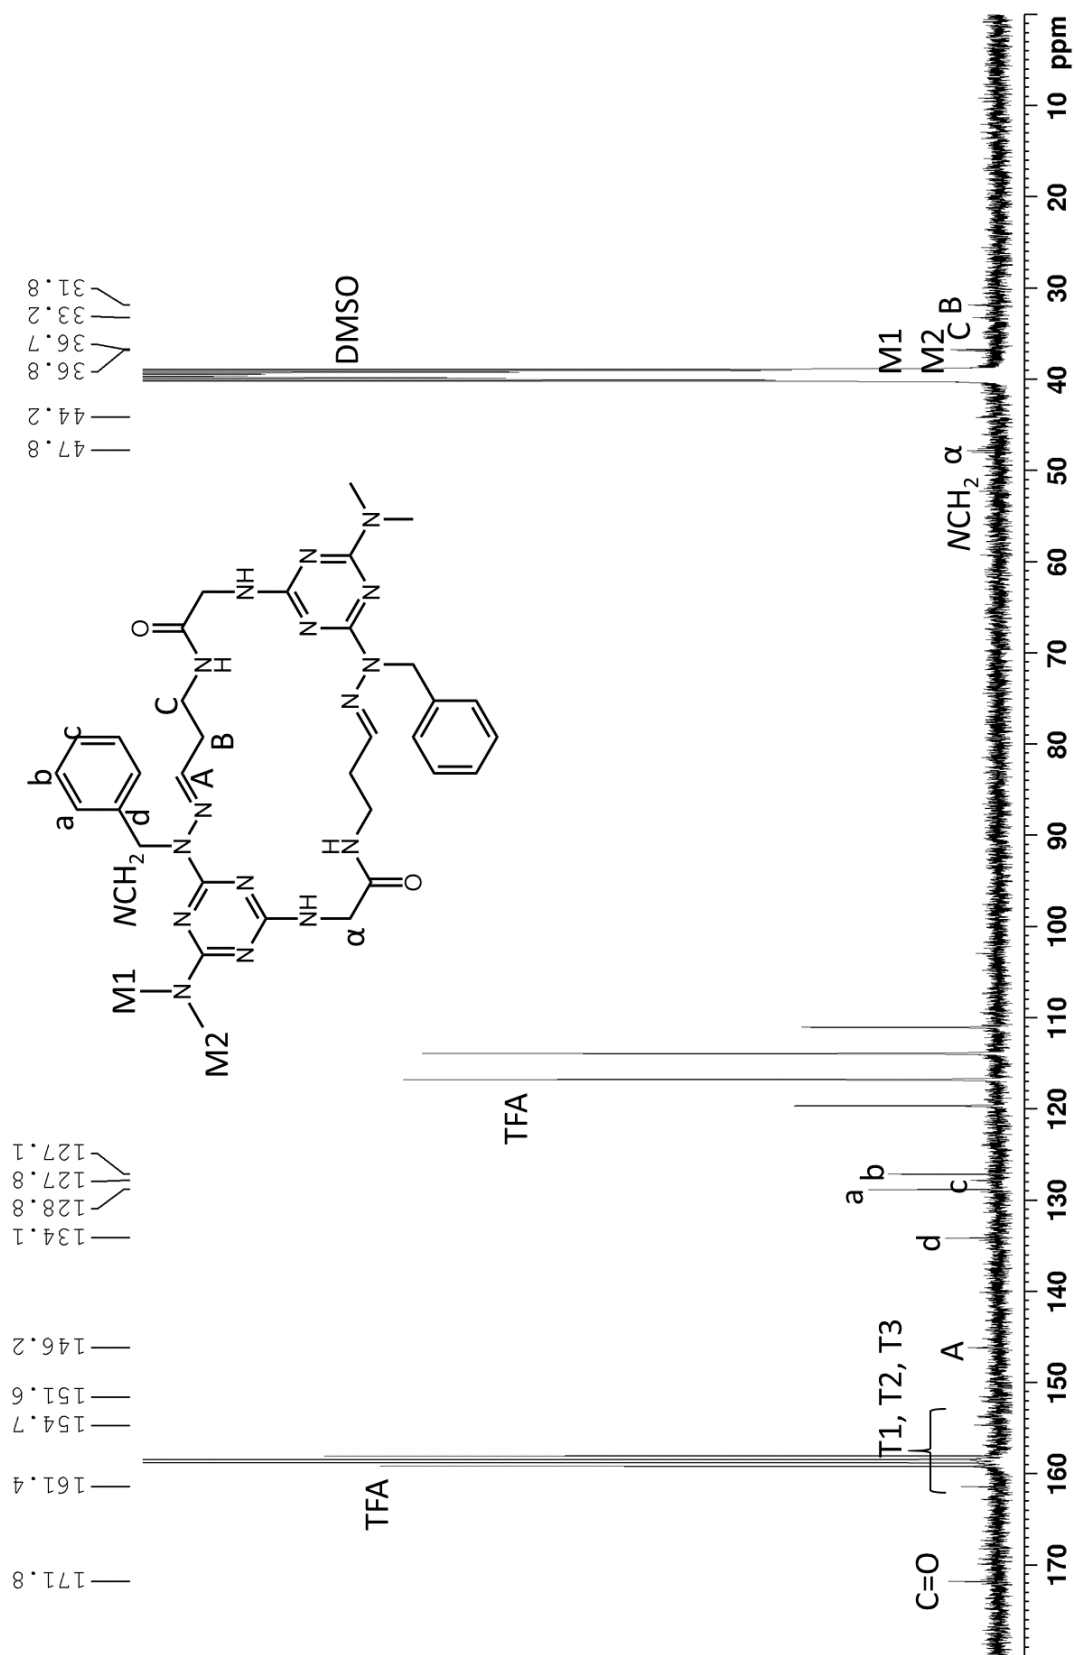

Figure S46. The 100 MHz  $^{13}\text{C}$  NMR Spectrum of  $\text{G}^{\text{NNHx}}$  in DMSO

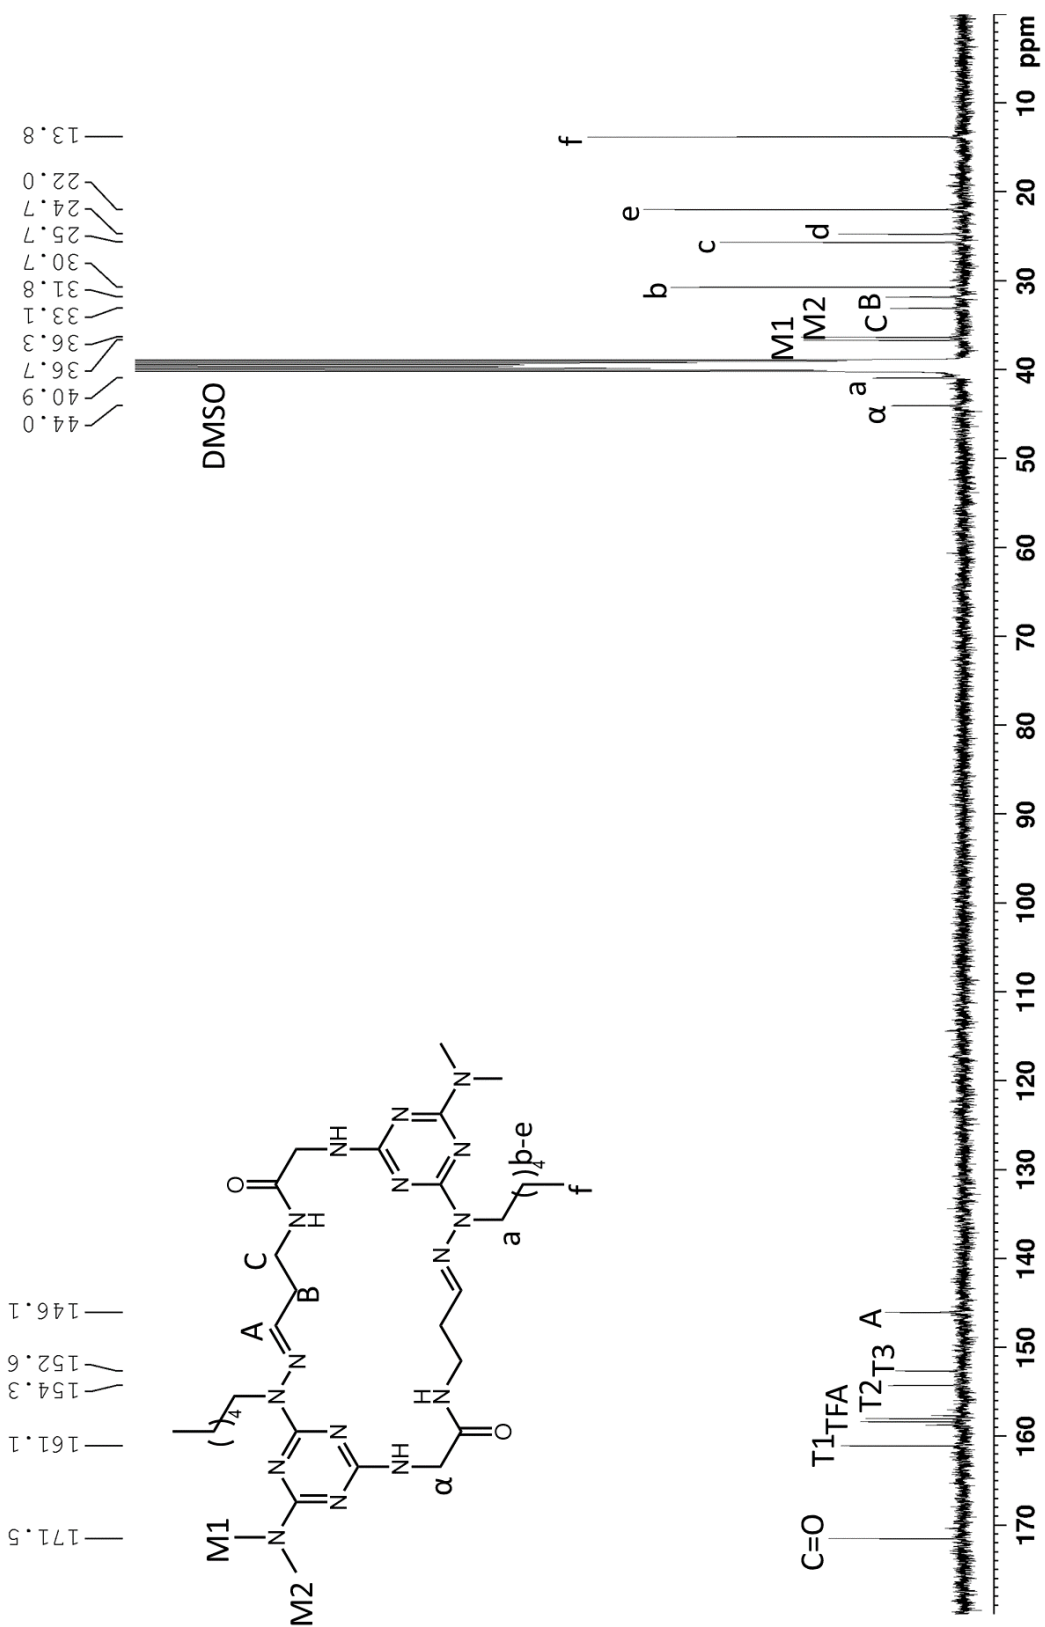

Figure S47. The 400 MHz rOesy and COSY NMR Spectrum of  $G^{NMMe}$  in DMSO.

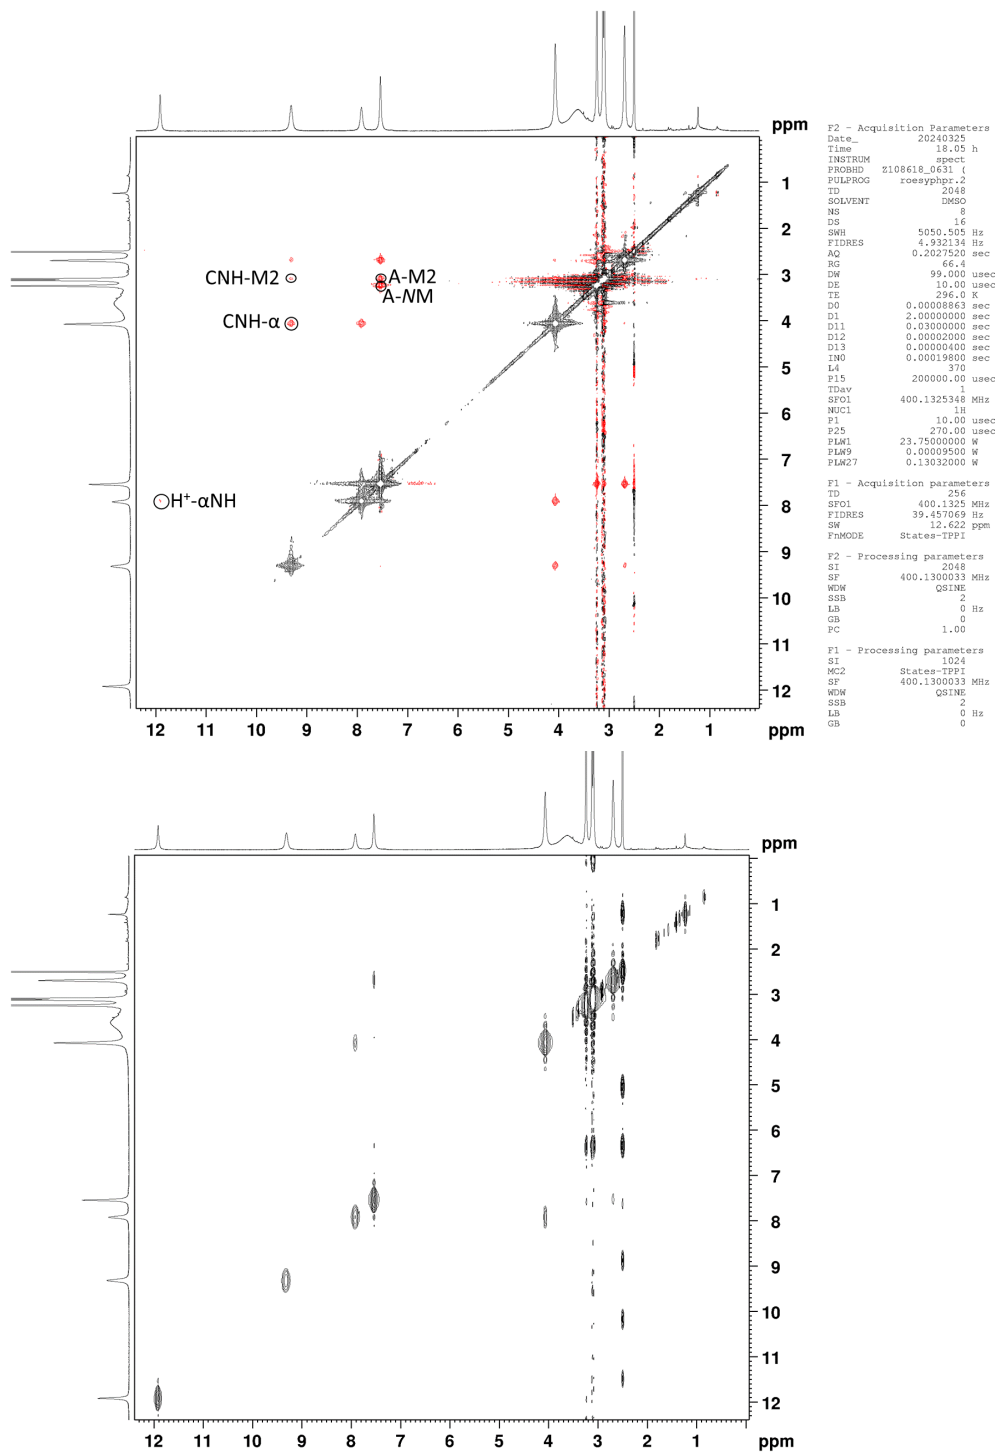

Figure S48. The 400 MHz rOesy and COSY NMR Spectrum of  $G^{NNet}$  in DMSO.

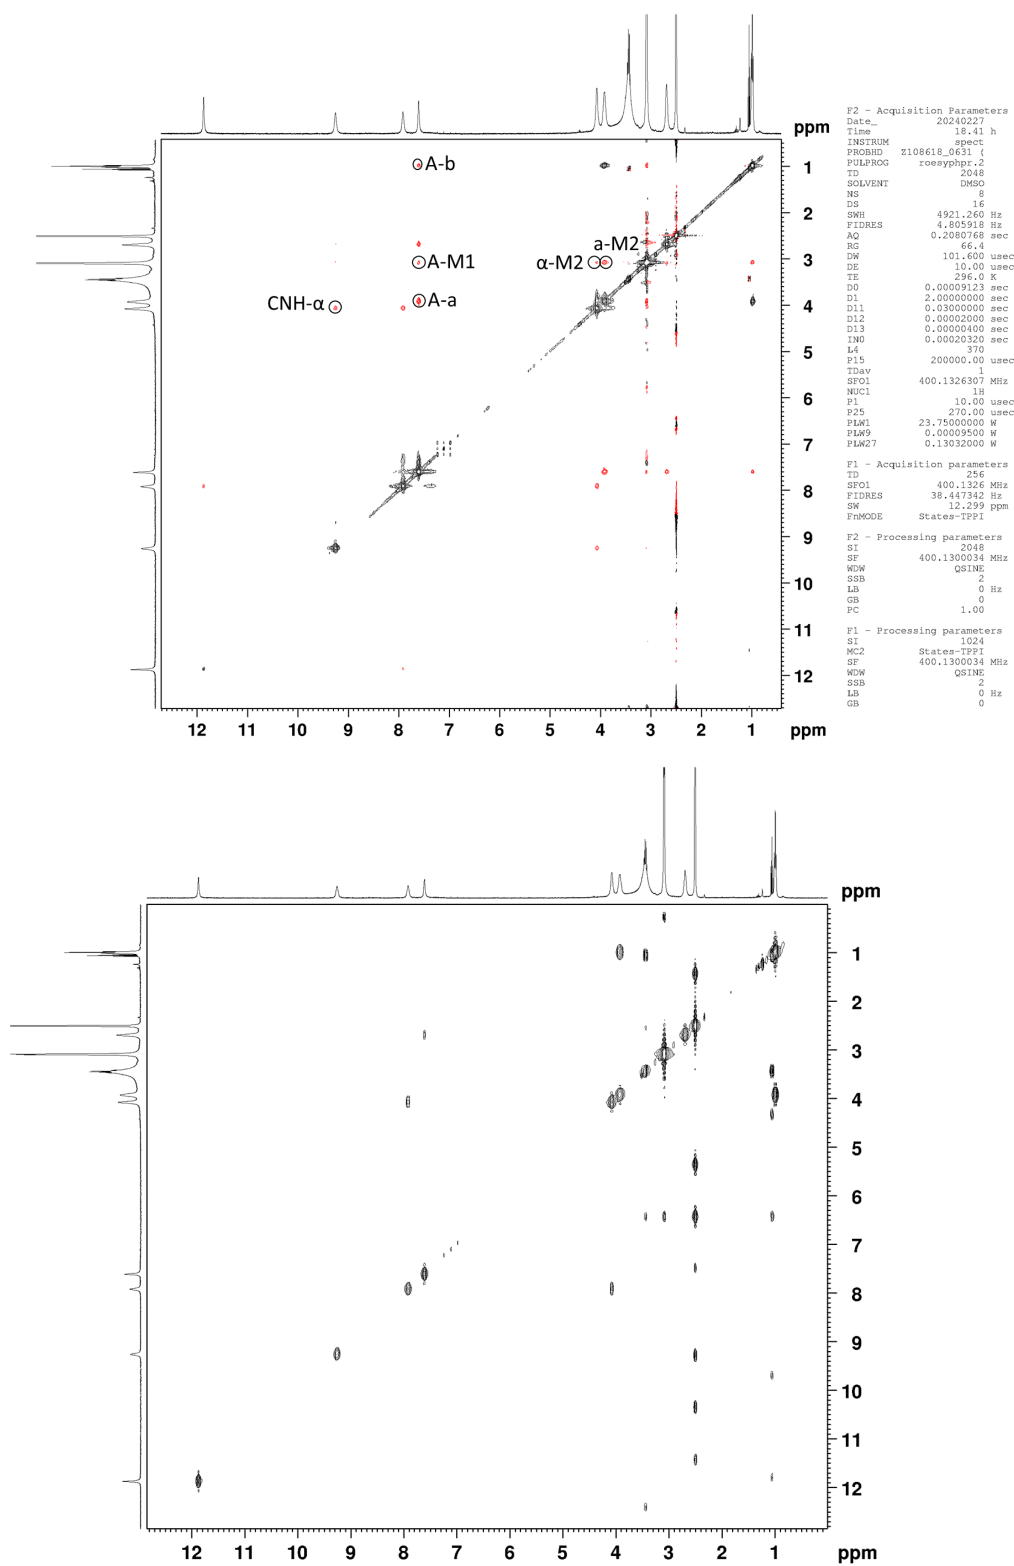



Figure S49. The 400 MHz rOesy and COSY NMR Spectrum of  $G^{NIPr}$  in DMSO.

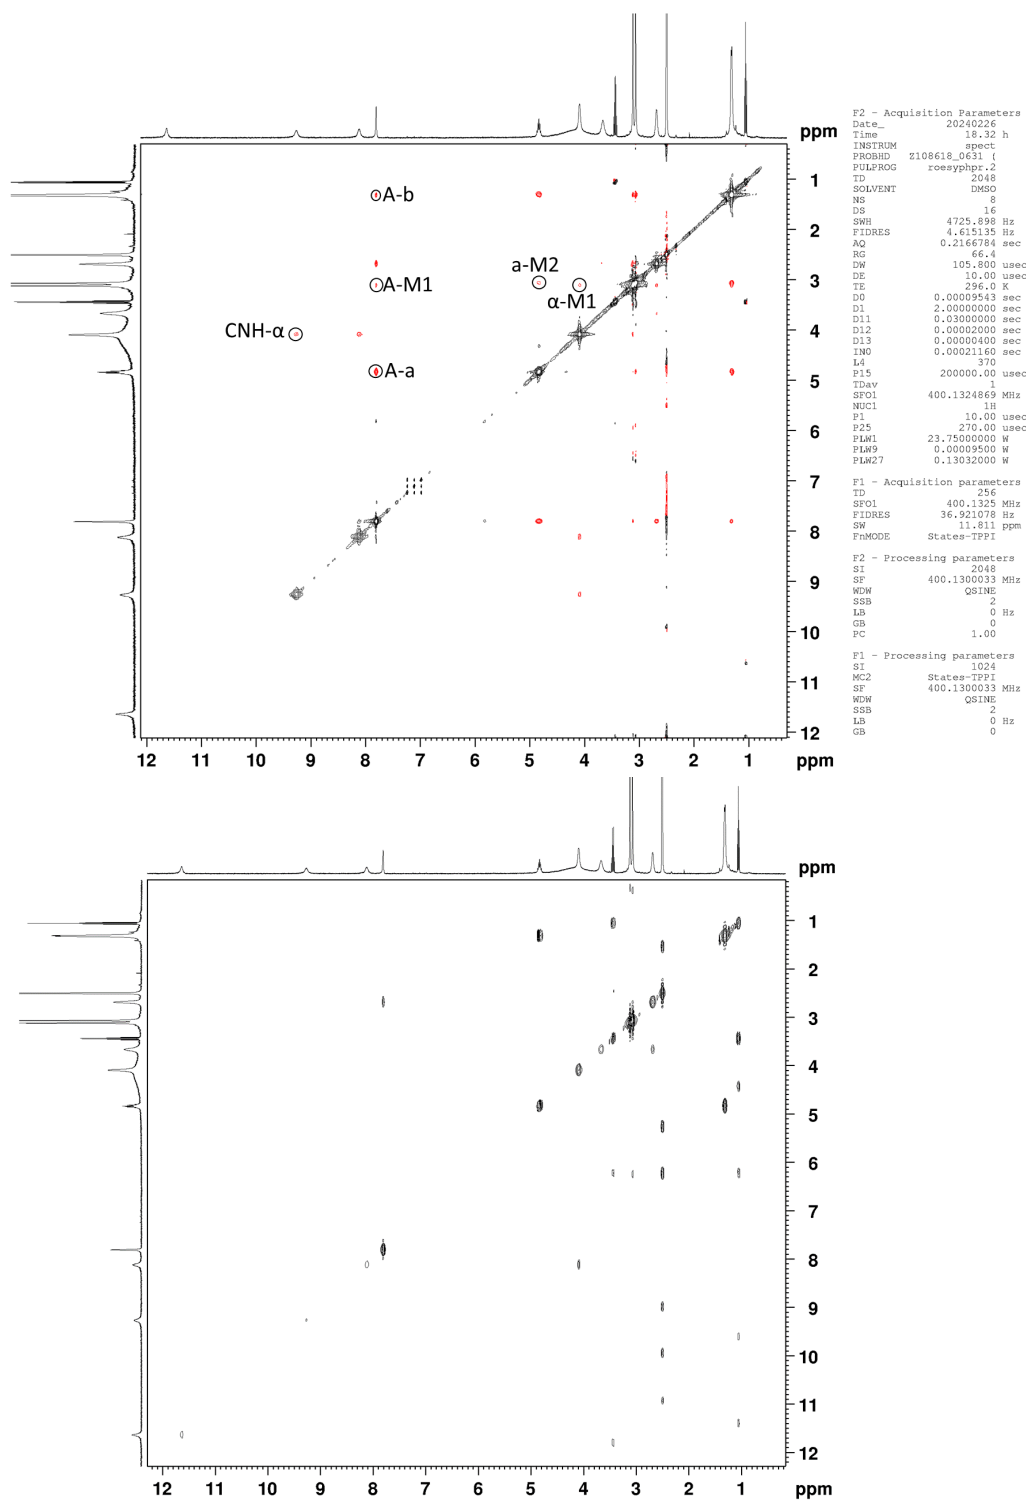

Figure S50. The 400 MHz rOesy and COSY NMR Spectrum of  $G^{NBn}$  in DMSO.

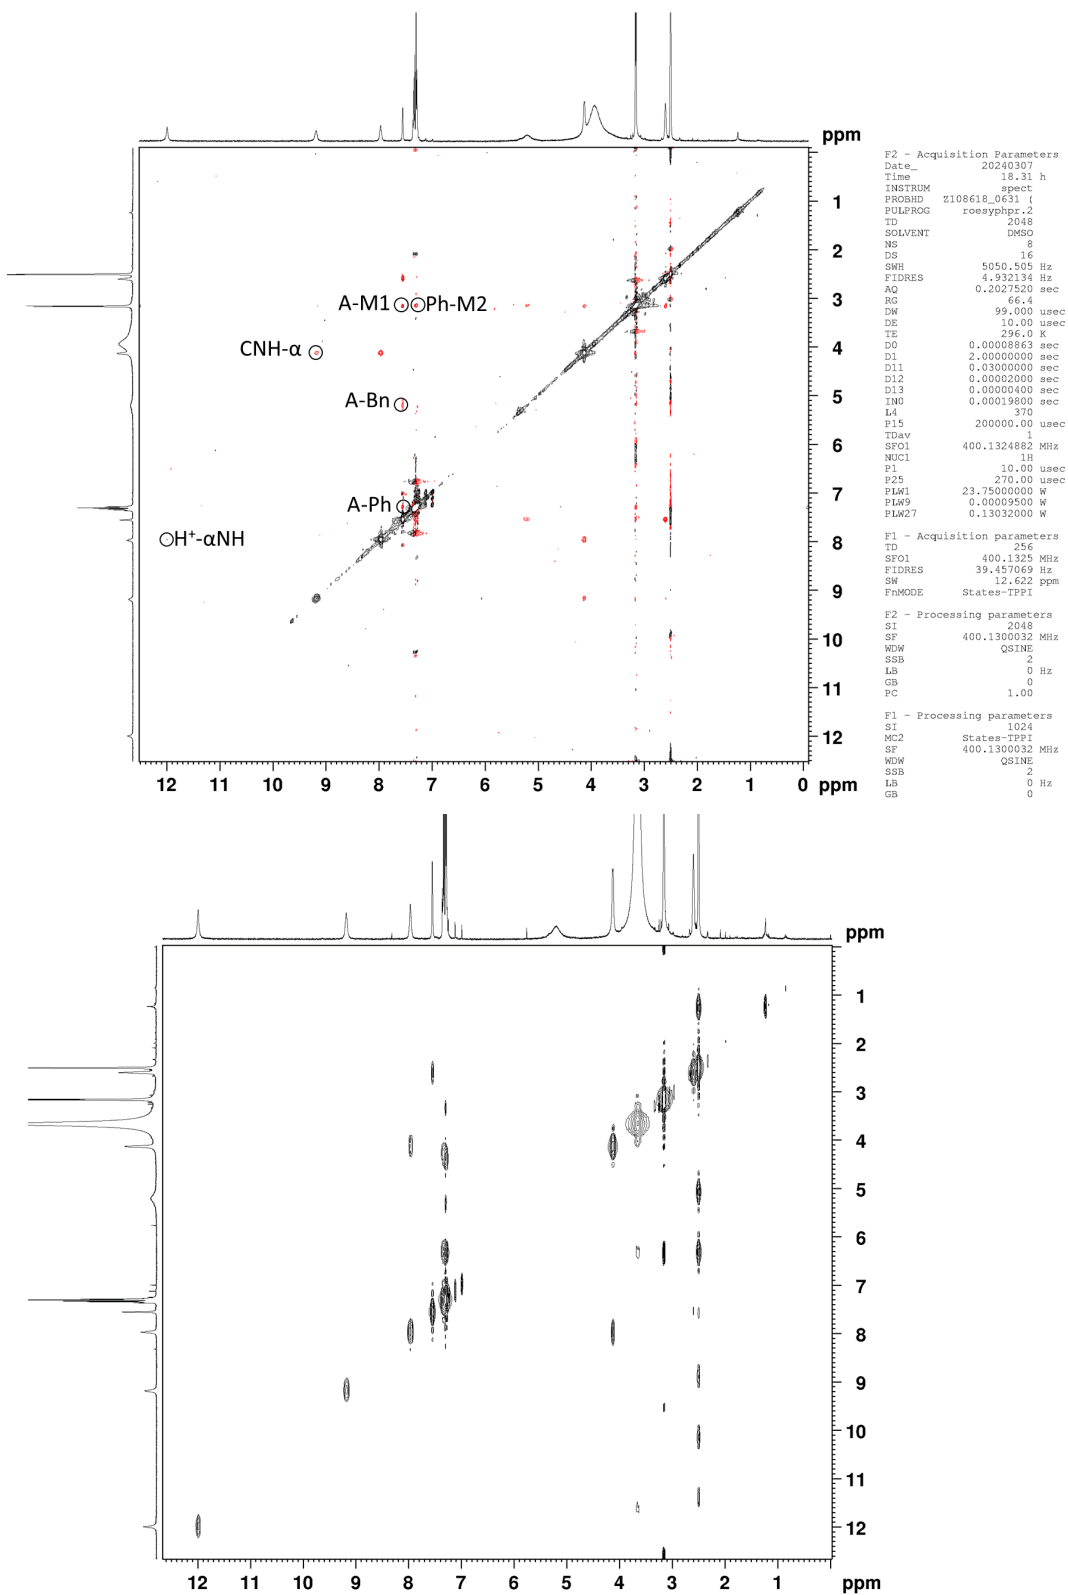

Figure S51. The 400 MHz rOesy and COSY NMR Spectra of  $G^{NNHx}$  in DMSO.

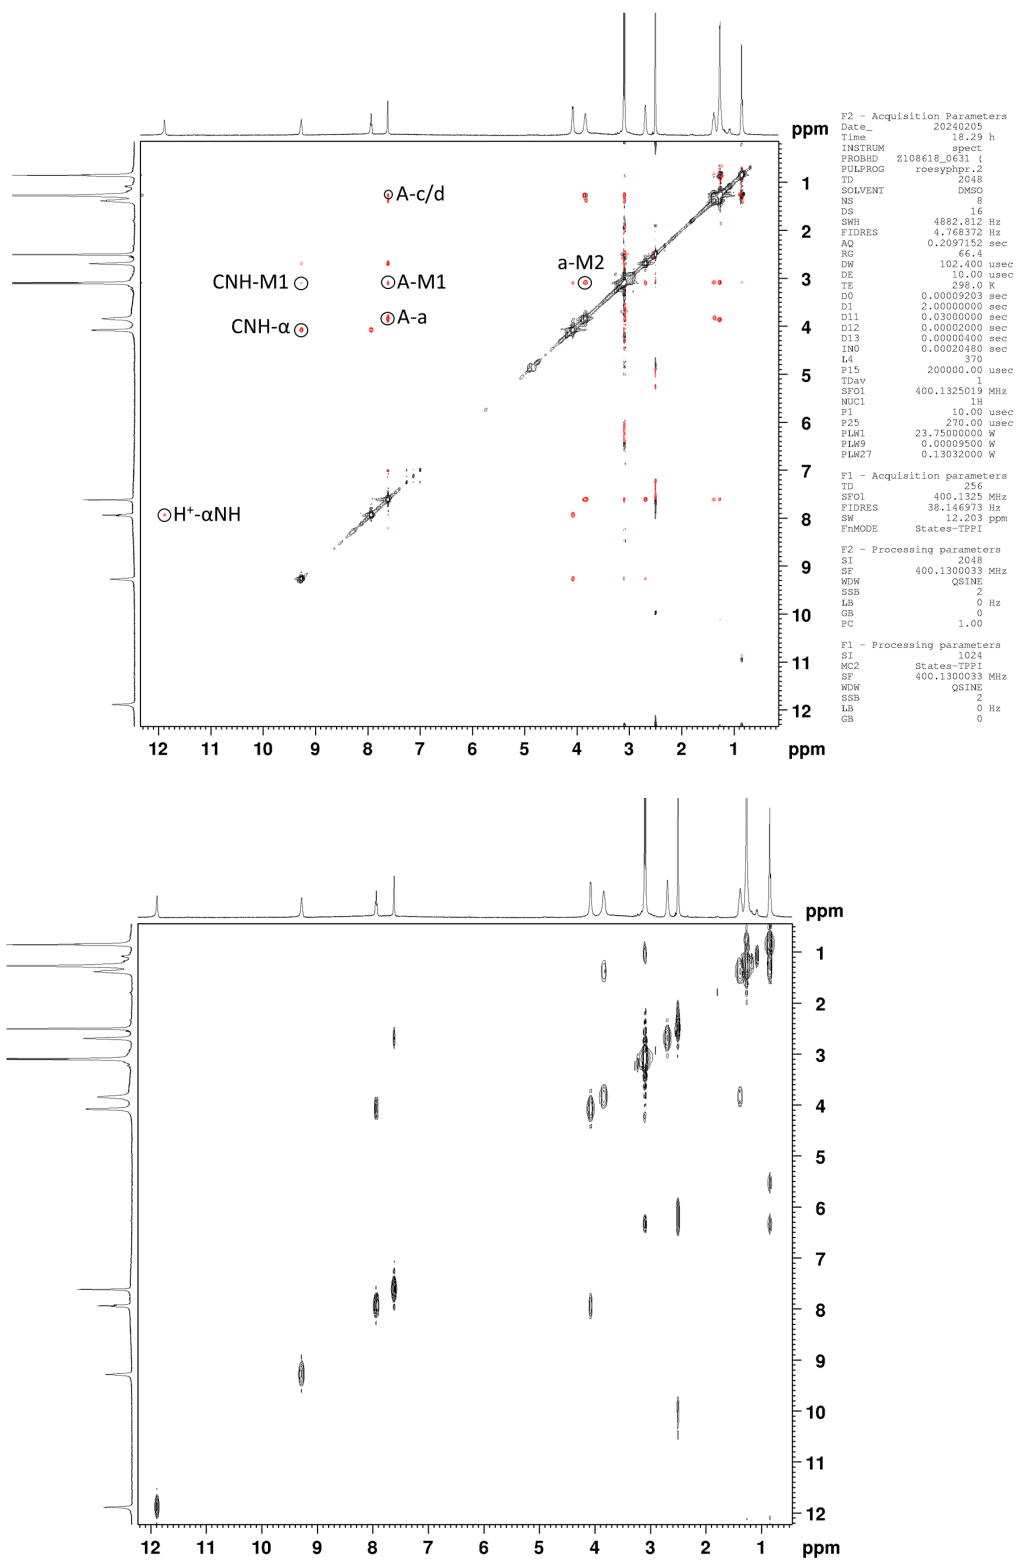

Figure S52. HRMS (ESI) of G<sup>NNMe</sup>.

| Elmt | Val. | Min | Max | Elmt | Val. | Min | Max | Elmt | Val. | Min | Max | Use Adduct |
|------|------|-----|-----|------|------|-----|-----|------|------|-----|-----|------------|
| H    | 1    | 0   | 300 | O    | 2    | 0   | 2   | S    | 2    | 0   | 0   | H          |
| C    | 4    | 0   | 22  | F    | 1    | 0   | 0   | Cu   | 2    | 0   | 0   |            |
| N    | 3    | 0   | 16  | Si   | 4    | 0   | 0   |      |      |     |     |            |

Error Margin (ppm): 10  
 HC Ratio: unlimited  
 Max Isotopes: all  
 MSn Iso RI (%): 75.00

DBE Range: -2.0 - 1000.0  
 Apply N Rule: yes  
 Isotope RI (%): 1.00  
 MSn Logic Mode: AND

Electron Ions: both  
 Use MSn Info: no  
 Isotope Res: 10000  
 Max Results: 500

Event#: 1 MS(E+) Ret. Time : 0.180 Scan# : 28

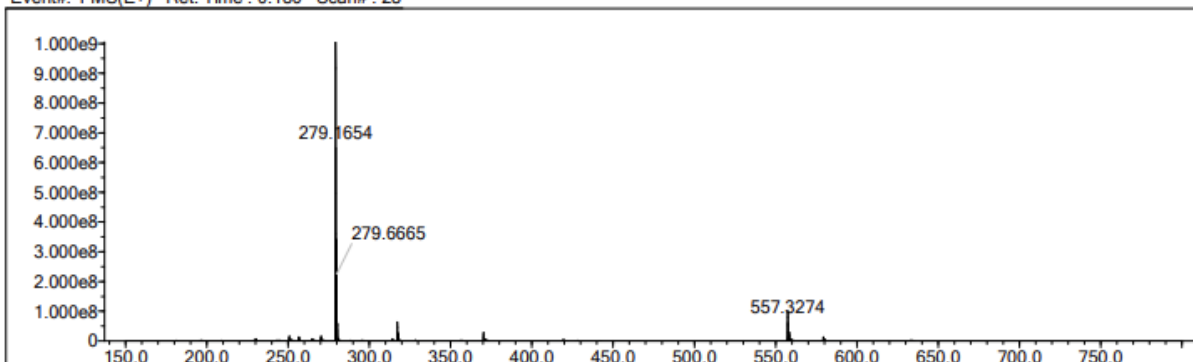

Measured region for 557.3274 m/z

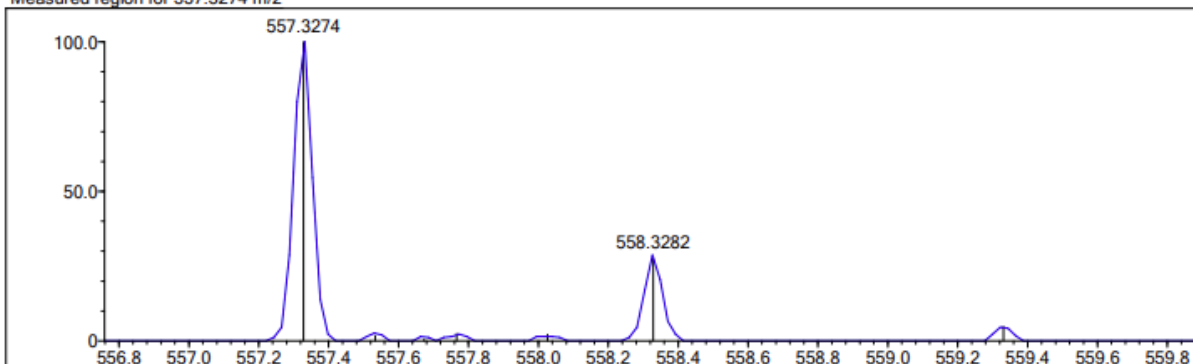

C22 H36 N16 O2 [M+H]<sup>+</sup> : Predicted region for 557.3280 m/z

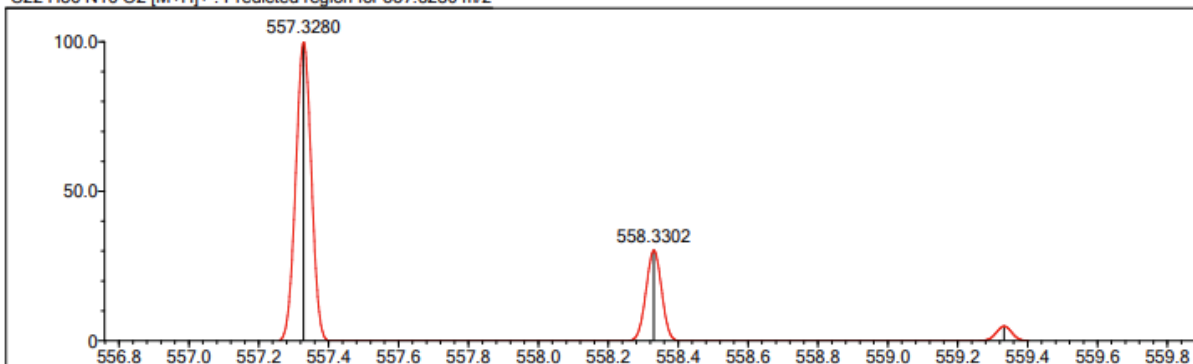

| Rank | Score | Formula (M)    | Ion                | Meas. m/z | Pred. m/z | Df. (mDa) | Df. (ppm) | Iso   | DBE  |
|------|-------|----------------|--------------------|-----------|-----------|-----------|-----------|-------|------|
| 1    | 96.42 | C22 H36 N16 O2 | [M+H] <sup>+</sup> | 557.3274  | 557.3280  | -0.6      | -1.08     | 96.62 | 13.0 |

Figure S53. HRMS (ESI) of  $G^{NNEt}$ .

| Elmt | Val. | Min | Max | Elmt | Val. | Min | Max | Elmt | Val. | Min | Max | Use Adduct |
|------|------|-----|-----|------|------|-----|-----|------|------|-----|-----|------------|
| H    | 1    | 0   | 300 | O    | 2    | 0   | 2   | S    | 2    | 0   | 0   | H          |
| C    | 4    | 0   | 24  | F    | 1    | 0   | 0   | Cu   | 2    | 0   | 0   |            |
| N    | 3    | 0   | 16  | Si   | 4    | 0   | 0   |      |      |     |     |            |

Error Margin (ppm): 10  
 HC Ratio: unlimited  
 Max Isotopes: all  
 MSn Iso RI (%): 75.00

DBE Range: -2.0 - 1000.0  
 Apply N Rule: yes  
 Isotope RI (%): 1.00  
 MSn Logic Mode: AND

Electron Ions: both  
 Use MSn Info: no  
 Isotope Res: 10000  
 Max Results: 500

Event#: 1 MS(E+) Ret. Time : 0.287 Scan#: 44

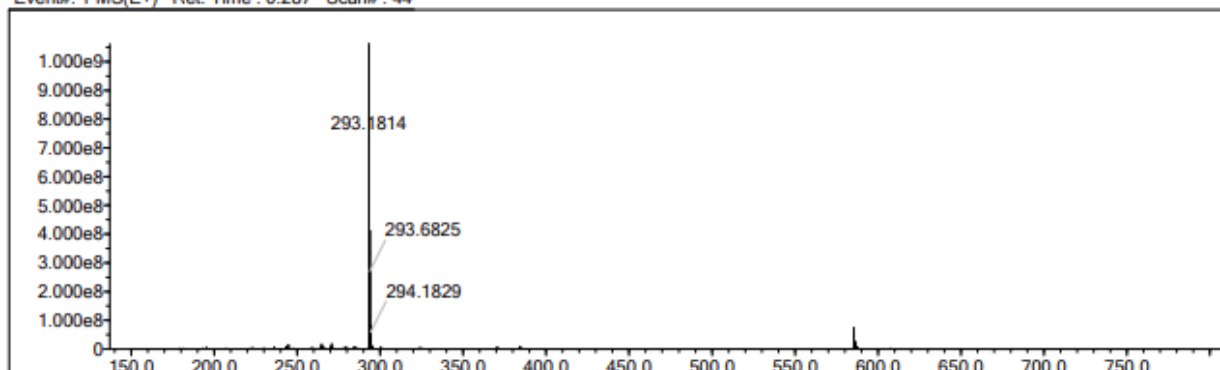

Measured region for 585.3572 m/z

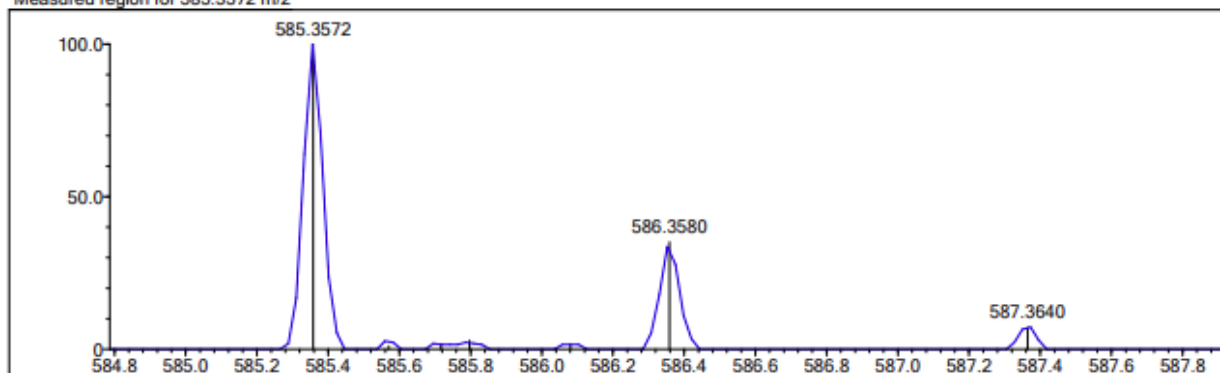

C24 H40 N16 O2 [M+H]<sup>+</sup> : Predicted region for 585.3593 m/z

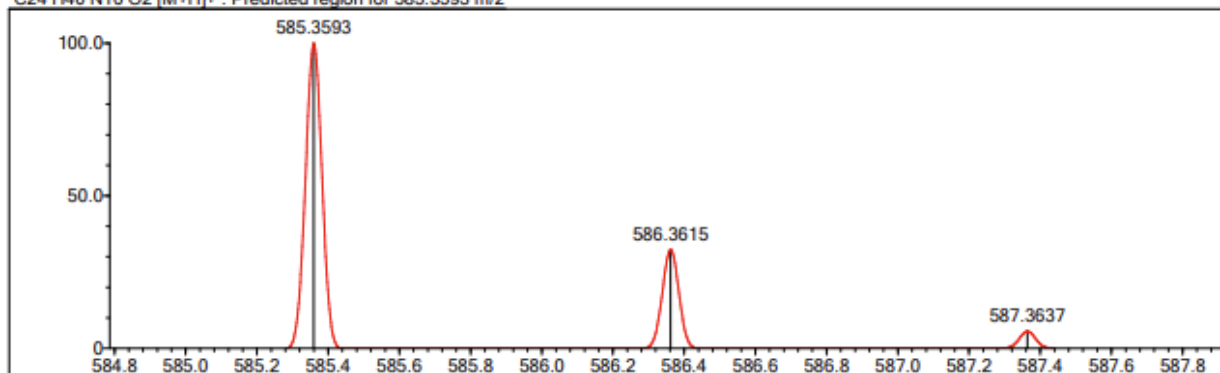

| Rank | Score | Formula (M)    | Ion                | Meas. m/z | Pred. m/z | Df. (mDa) | Df. (ppm) | Isotope | DBE  |
|------|-------|----------------|--------------------|-----------|-----------|-----------|-----------|---------|------|
| 1    | 86.23 | C24 H40 N16 O2 | [M+H] <sup>+</sup> | 585.3572  | 585.3593  | -2.1      | -3.59     | 92.20   | 13.0 |

Figure S54. HRMS (ESI) of G<sup>NNiPr</sup>.

| Elmt | Val. | Min | Max | Elmt | Val. | Min | Max | Elmt | Val. | Min | Max | Use Adduct |
|------|------|-----|-----|------|------|-----|-----|------|------|-----|-----|------------|
| H    | 1    | 0   | 300 | O    | 2    | 0   | 2   | S    | 2    | 0   | 0   | H          |
| C    | 4    | 0   | 26  | F    | 1    | 0   | 0   | Cu   | 2    | 0   | 0   |            |
| N    | 3    | 0   | 16  | Si   | 4    | 0   | 0   |      |      |     |     |            |

Error Margin (ppm): 10  
 HC Ratio: unlimited  
 Max Isotopes: all  
 MSn Iso RI (%): 75.00

DBE Range: -2.0 - 1000.0  
 Apply N Rule: yes  
 Isotope RI (%): 1.00  
 MSn Logic Mode: AND

Electron Ions: both  
 Use MSn Info: no  
 Isotope Res: 10000  
 Max Results: 500

Event#: 1 MS(E+) Ret. Time : 0.420 Scan# : 64

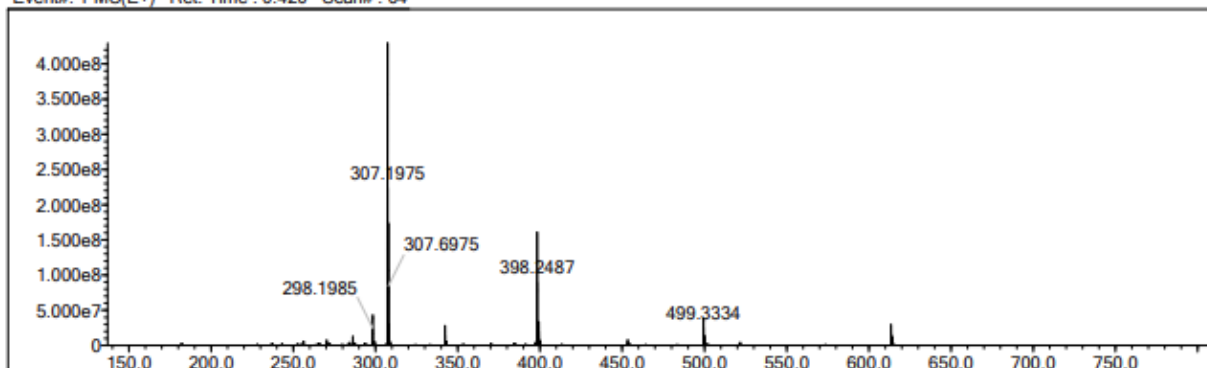

Measured region for 613.3907 m/z

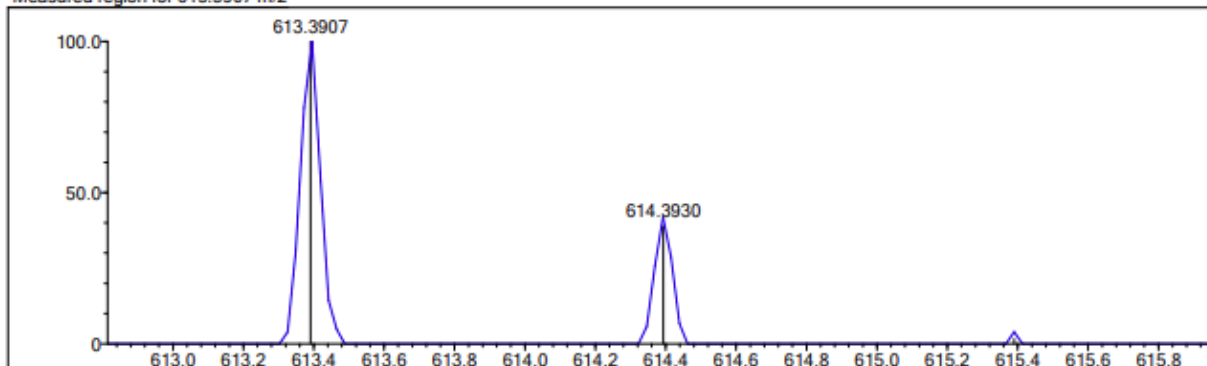

C26 H44 N16 O2 [M+H]<sup>+</sup> : Predicted region for 613.3906 m/z

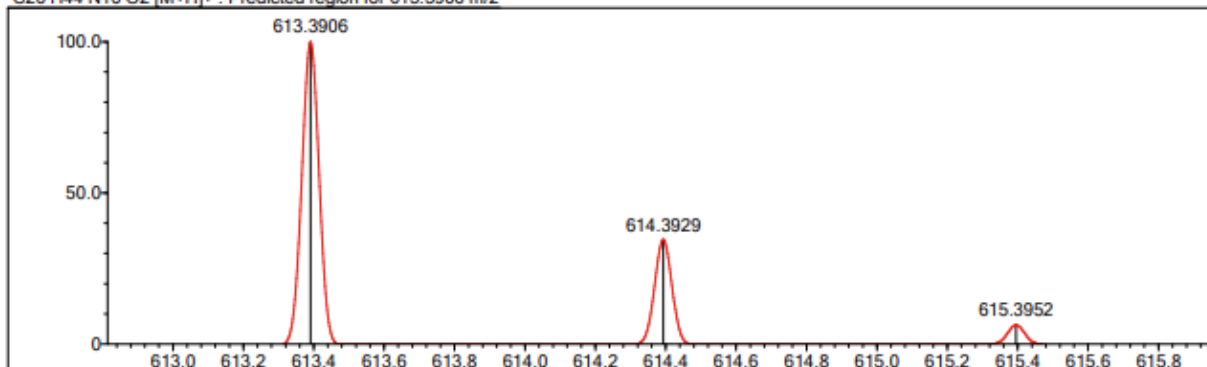

| Rank | Score | Formula (M)    | Ion                | Meas. m/z | Pred. m/z | Df. (mDa) | Df. (ppm) | Iso   | DBE  |
|------|-------|----------------|--------------------|-----------|-----------|-----------|-----------|-------|------|
| 1    | 76.53 | C26 H44 N16 O2 | [M+H] <sup>+</sup> | 613.3907  | 613.3906  | 0.1       | 0.16      | 76.53 | 13.0 |

Figure S55. HRMS (ESI) of G<sup>NNBn</sup>.

| Elmt | Val. | Min | Max | Elmt | Val. | Min | Max | Elmt | Val. | Min | Max | Use Adduct |
|------|------|-----|-----|------|------|-----|-----|------|------|-----|-----|------------|
| H    | 1    | 0   | 300 | O    | 2    | 0   | 2   | S    | 2    | 0   | 0   | H          |
| C    | 4    | 0   | 34  | F    | 1    | 0   | 0   | Cu   | 2    | 0   | 0   |            |
| N    | 3    | 0   | 16  | Si   | 4    | 0   | 0   |      |      |     |     |            |

Error Margin (ppm): 10  
 HC Ratio: unlimited  
 Max Isotopes: all  
 MSn Iso RI (%): 75.00

DBE Range: -2.0 - 1000.0  
 Apply N Rule: yes  
 Isotope RI (%): 1.00  
 MSn Logic Mode: AND

Electron Ions: both  
 Use MSn Info: no  
 Isotope Res: 10000  
 Max Results: 500

Event#: 1 MS(E+) Ret. Time : 0.300 Scan#: 46

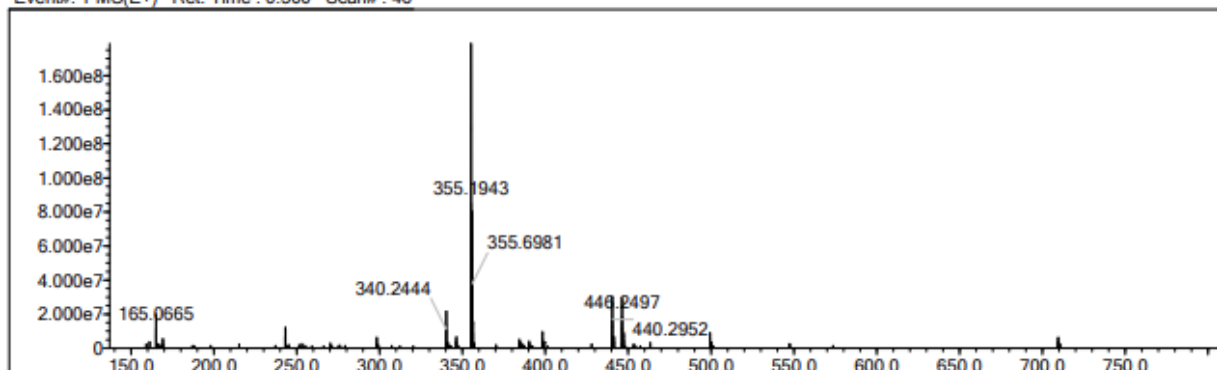

Measured region for 709.3896 m/z

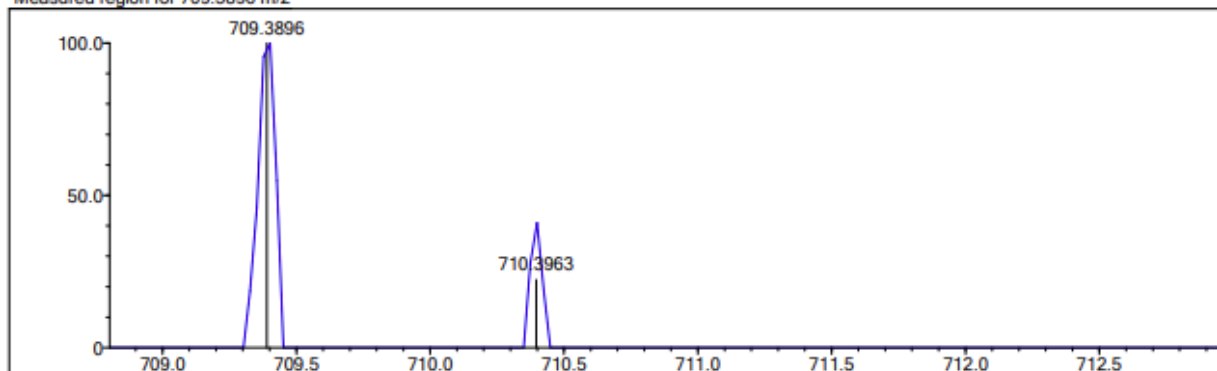

C34 H44 N16 O2 [M+H]<sup>+</sup> : Predicted region for 709.3906 m/z

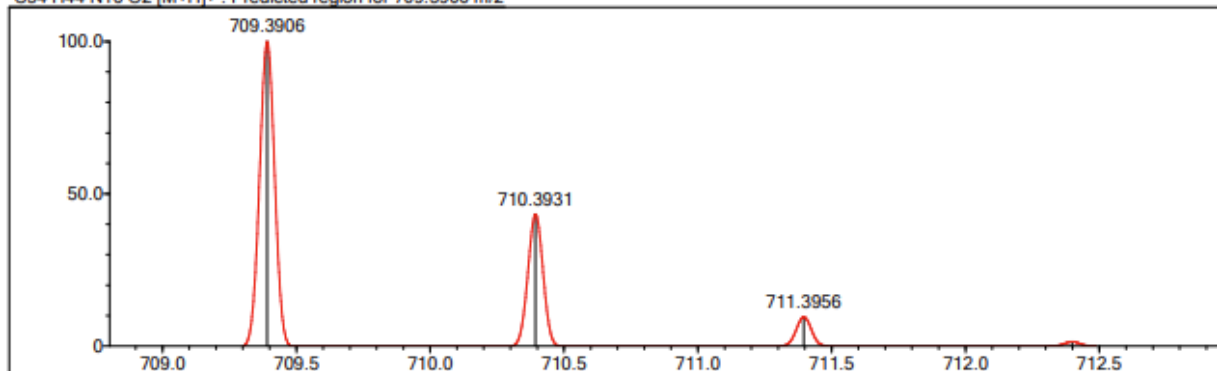

| Rank | Score | Formula (M)    | Ion                | Meas. m/z | Pred. m/z | Df. (mDa) | Df. (ppm) | Is   | DBE  |
|------|-------|----------------|--------------------|-----------|-----------|-----------|-----------|------|------|
| 1    | 0.00  | C34 H44 N16 O2 | [M+H] <sup>+</sup> | 709.3896  | 709.3906  | -1.0      | -1.41     | 0.00 | 21.0 |

Figure S56. HRMS (ESI) of G<sup>NNHx</sup>.

| Elmt | Val. | Min | Max | Elmt | Val. | Min | Max | Elmt | Val. | Min | Max | Use Adduct |
|------|------|-----|-----|------|------|-----|-----|------|------|-----|-----|------------|
| H    | 1    | 0   | 300 | O    | 2    | 0   | 2   | S    | 2    | 0   | 0   | H          |
| C    | 4    | 0   | 32  | F    | 1    | 0   | 0   | Cu   | 2    | 0   | 0   |            |
| N    | 3    | 0   | 16  | Si   | 4    | 0   | 0   |      |      |     |     |            |

Error Margin (ppm): 10  
 HC Ratio: unlimited  
 Max Isotopes: all  
 MSn Iso RI (%): 75.00

DBE Range: -2.0 - 1000.0  
 Apply N Rule: yes  
 Isotope RI (%): 1.00  
 MSn Logic Mode: AND

Electron Ions: both  
 Use MSn Info: no  
 Isotope Res: 10000  
 Max Results: 500

Event#: 1 MS(E+) Ret. Time : 0.307 Scan# : 47

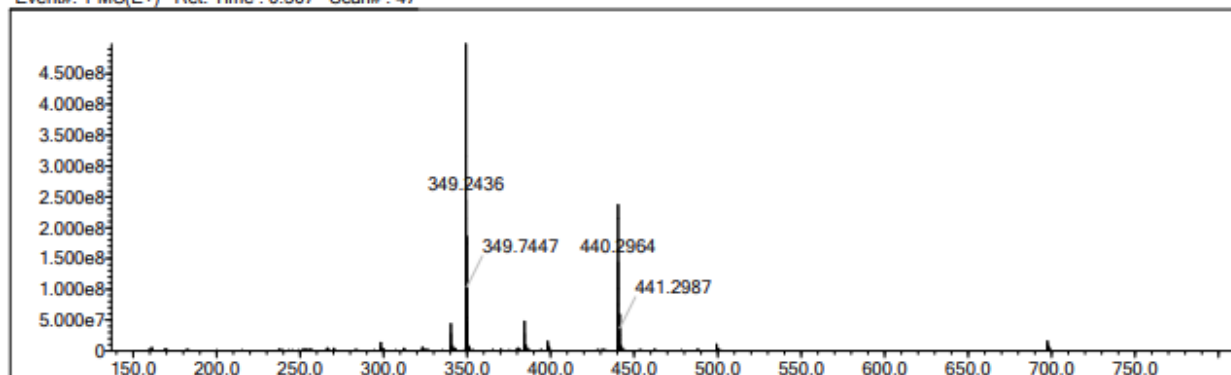

Measured region for 697.4863 m/z

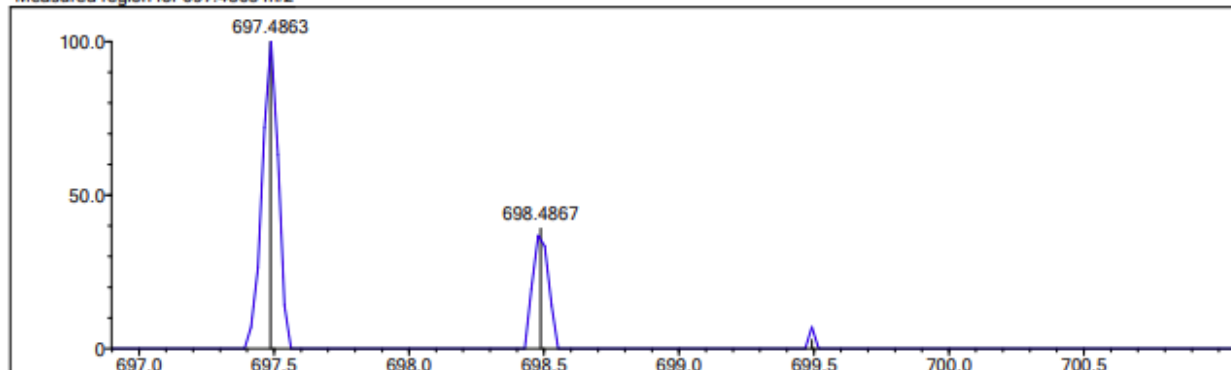

C32 H56 N16 O2 [M+H]<sup>+</sup> : Predicted region for 697.4845 m/z

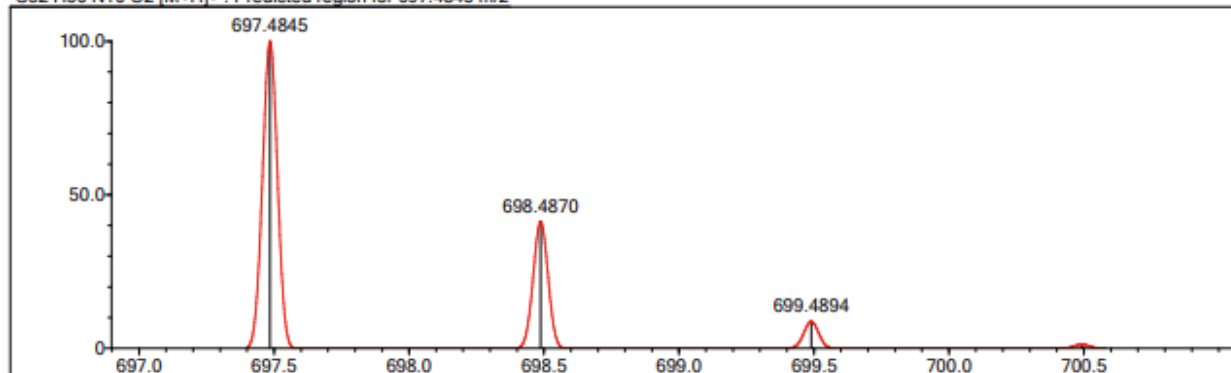

| Rank | Score | Formula (M)    | Ion                | Mess. m/z | Pred. m/z | Df. (mDa) | Df. (ppm) | Iso   | DBE  |
|------|-------|----------------|--------------------|-----------|-----------|-----------|-----------|-------|------|
| 1    | 74.16 | C32 H56 N16 O2 | [M+H] <sup>+</sup> | 697.4863  | 697.4845  | 1.8       | 2.58      | 77.21 | 13.0 |



## GENERAL CHEMISTRY

Flash chromatography experiments were carried out on silica gel with a porosity of 60 Å, particle size 50–63 μm, surface area 500 – 600 m<sup>2</sup>/g, a bulk density of 0.4 g/mL and a pH range of 6.5 – 7.5. Dichloromethane/methanol, chloroform/methanol, or ethyl acetate/hexanes were used as eluents for chromatographic purification. Thin-layer chromatography (TLC) was carried out in sealed chambers and visualized by UV absorption with following ninhydrin stain (1.5 g ninhydrin in 500 mL of isopropyl alcohol and 3.0 mL acetic acid) followed by heating. Excess solvent (e.g. post extraction, column chromatography, etc.) was removed *via* rotary evaporation on a Buchi Rotavapor R200 with a Welch Self-Cleaning Dry Vacuum System. All workup and purification procedures were carried out with reagent-grade solvents under ambient atmosphere. Abbreviations are as follows: BOC = *tert*-butyloxycarbonyl, TFA = trifluoroacetic acid, DCM = dichloromethane, THF = tetrahydrofuran, DMA = dimethylamine, HOBT = hydroxy benzotriazole, HBTU = hexafluorophosphate benzotriazole tetramethyl uronium, DIPEA = diisopropylethylamine, EDC = 1-ethyl-3-(3-dimethylaminopropyl)carbodiimide.

## SYNTHESIS OF HYDRAZONES

General synthesis of non-commercially available hydrazones, deriving from the synthesis of **tert-butyl 2-benzylhydrazonocarboxylate**. Synthesis of the hydrazones was prepared by the imination of an aldehyde with tert-butyl carbazate as illustrated and described below.

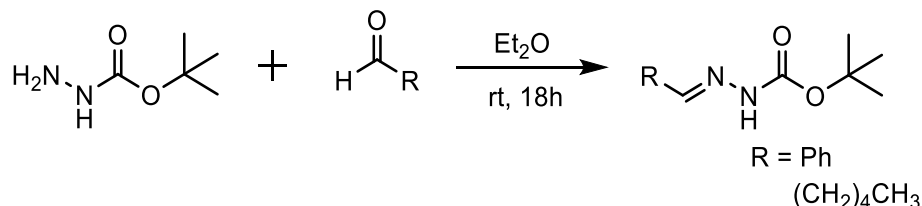

This procedure is a known synthesis.<sup>C</sup> Freshly distilled benzaldehyde (4.06 g, 38.3 mmol, 1.3 eq) was added to a solution of tert-butyl carbazate (3.6646 g, 27.7 mmol, 1 eq) in diethyl ether (18 mL, 1.5 M). The reaction was stirred for 18 hours and the precipitate was filtered and washed with cold diethyl ether. The precipitate then had excess solvent and ether removed *via* rotary evaporation, yielding pure **tert-butyl 2-benzylhydrazonocarboxylate** (5.573 g, 25.1 mmol, 90% yield) as a white powder.

HRMS (ESI) *m/z*: [M + Na]<sup>+</sup> Calculated for C<sub>12</sub>H<sub>16</sub>N<sub>2</sub>O<sub>2</sub> 243.1104; Found 243.1089

<sup>1</sup>H NMR (CDCl<sub>3</sub>, 400 MHz): δ 8.04 (s, 1 H), 7.84 (s, 1 H), 7.68 (m, 2 H), 7.34 (m, 3 H), 1.53 (s, 9 H).

<sup>13</sup>C{<sup>1</sup>H} NMR (CDCl<sub>3</sub>, 100 MHz): δ 152.5, 143.7, 133.9, 129.8, 128.6, 127.2, 81.5, 28.3.

**tert-Butyl 2-hexylhydrazonocarboxylate**: Hexanal (2.0013 g, 20.0 mmol, 1.3 eq) was added to a solution of tert-butyl carbazate (2.0305 g, 15.4 mmol, 1 eq) in diethyl ether (10 mL, 1.5 M). The reaction was stirred for 11 hours and excess solvent was removed *via* rotary evaporation. The solid was then washed with cold diethyl ether over filter. The precipitate was isolated and residual diethyl ether was removed *via* rotary evaporation, affording pure **tert-butyl 2-hexylhydrazonocarboxylate** as a white flaky solid (3.111 g, 14.5 mmol, 94% yield).

HRMS (ESI) *m/z*: [2M + H + Na]<sup>2+</sup> Calculated for C<sub>11</sub>H<sub>22</sub>N<sub>2</sub>O<sub>2</sub> 452.3327; Found 452.3262

<sup>1</sup>H NMR (CDCl<sub>3</sub>, 400 MHz): δ 7.62 (s, 1 H), 7.13 (t, *J* = 5.1 Hz, 1 H), 2.27 (td, *J* = 9.4, 5.1 Hz, 2 H), 1.53 – 1.45 (m, 11 H), 1.35 – 1.25 (m, 4 H), 0.88 (m, 3 H).

<sup>13</sup>C{<sup>1</sup>H} NMR (CDCl<sub>3</sub>, 100 MHz): δ 152.5, 147.5, 81.0, 32.2, 31.4, 28.3, 26.4, 22.4, 14.0.

Synthesis of **tert-butyl 2-benzylhydrazinecarboxylate** by palladium on carbon catalyzed reduction of the hydrazone.

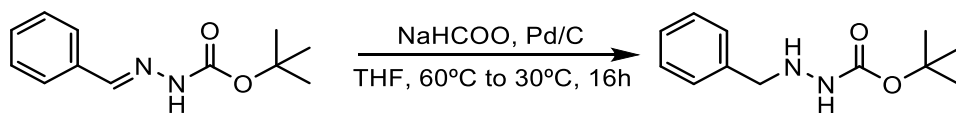

This procedure is a known synthesis.<sup>D</sup> **tert-Butyl 2-benzylhydrazonecarboxylate** (2.0392, 9.26 mmol, 1 eq) was added to a round-bottom flask along with 10% Pd/C (0.1972 g, 1.85 mmol, 0.2 eq) and sodium formate (1.1333 g, 16.64 mmol, 1.8 eq) along with 9.2 mL of 17% water in ethanol (1 M). The reaction was heated to 60°C and stirred for 1.5 hours. The temperature was then lowered to 30°C and stirred for 17 hours. The reaction was then filtered and washed with 50 mL EtOAc and 50 mL water. The solvent was then extracted twice with 50 mL EtOAc. The organic layer was dried with magnesium sulfate and filtered. Solvent was removed *via* rotary evaporation, yielding **tert-butyl 2-benzylhydrazinecarboxylate** along with a small amount of the hydrazone. The hydrazine/hydrazone mixture was utilized without further purification (1.649 g, 7.42 mmol, 80% crude yield), afforded as a flakey white powder.

HRMS (ESI) m/z: [M + Na]<sup>+</sup> Calculated for C<sub>12</sub>H<sub>18</sub>N<sub>2</sub>O<sub>2</sub> 245.1266; Found 245.1241

<sup>1</sup>H NMR (CDCl<sub>3</sub>, 400 MHz): δ 7.39 – 7.31 (m, 6 H), 6.08 (m, 1 H), 4.00 (m, 2 H), 1.47 (s, 9 H).

<sup>13</sup>C{<sup>1</sup>H} NMR (CDCl<sub>3</sub>, 100 MHz): δ 152.5, 133.9, 129.0, 128.5, 127.5, 81.5, 55.8, 28.3.

Synthesis of **tert-butyl 2-hexylhydrazinecarboxylate** by TsOH catalyzed NaCNBH<sub>3</sub> reduction of the hydrazone.

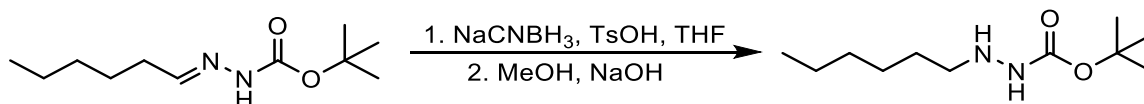

This procedure follows a known synthesis.<sup>E</sup> **tert-Butyl 2-hexylhydrazonecarboxylate** (2.5038, 11.7 mmol, 1 eq) in THF (75 mL, 0.16 M) was charged to a round-bottom flask. Sodium cyanoborohydride (0.750 g, 11.9 mmol, 1 eq) and bromocresol green were then added to the round-bottom flask with stirring, with an immediate dark blue color developing. *p*-Toluenesulfonic acid (2.0469 g, 11.9 mmol, 1 eq) in THF (75 mL, 0.16 M) was then carefully dripped in to the round-bottom flask over the course of an hour in order to maintain a pH between 3 – 5 (as evidenced by a light green color from the bromocresol green). Not all of the *p*-toluenesulfonic acid was added as the pH held steadily acidic after ~70mL of the acid solution was added. After 2 hours (1 hour since finishing adding the *p*-toluenesulfonic acid), saturated sodium carbonate in water was added to the round-bottom to turn the solution basic (development of a dark blue color) to prevent evolution of HCN gas. Solvent was then removed *via* rotary evaporation. The remaining solid was then extracted twice with 100 mL ethyl acetate and 100 mL saturated bicarbonate in water. The organic layer was isolated and ethyl acetate was removed *via* rotary evaporation. The resulting crude mixture was redissolved in methanol (35 mL) and 1M NaOH (15 mL, 0.2 M) and stirred for 2.5 hours. The solvent was removed *via* rotary evaporation. The resulting crude mixture was extracted twice with 100 mL ethyl acetate and 100 mL water. The organic layer was collected and dried with sodium sulfate and filtered. Ethyl acetate was then removed *via* rotary evaporation, and the crude reaction was purified with

column chromatography (275 mL silica, 15% ethyl acetate in hexanes to 25% ethyl acetate in hexanes), affording pure **tert-butyl 2-hexylhydrazinecarboxylate** (1.403 g, 6.5 mmol, 56% yield) as a clear oil.

HRMS (ESI) m/z: [M + H]<sup>+</sup> Calculated for C<sub>11</sub>H<sub>24</sub>N<sub>2</sub>O<sub>2</sub> 217.1911; Found 217.1896

<sup>1</sup>H NMR (CDCl<sub>3</sub>, 400 MHz): δ 6.06 (m, 1 H), 3.92 (m, 1 H), 2.83 (m, 2 H), 1.69 – 1.39 (m, 2 H), 1.46 (s, 9 H), 1.37 – 1.24 (m, 6 H), 0.88 (m, 3 H).

<sup>13</sup>C{<sup>1</sup>H} NMR (CDCl<sub>3</sub>, 100 MHz): δ 156.8, 80.3, 52.1, 31.8, 28.4, 27.8, 26.8, 22.6, 14.0.

**Figure S57.** The 400 MHz  $^1\text{H}$  and 100 MHz  $^{13}\text{C}$  NMR Spectra of *tert*-butyl 2-benzylhydrazonocarboxylate in  $\text{CDCl}_3$ .

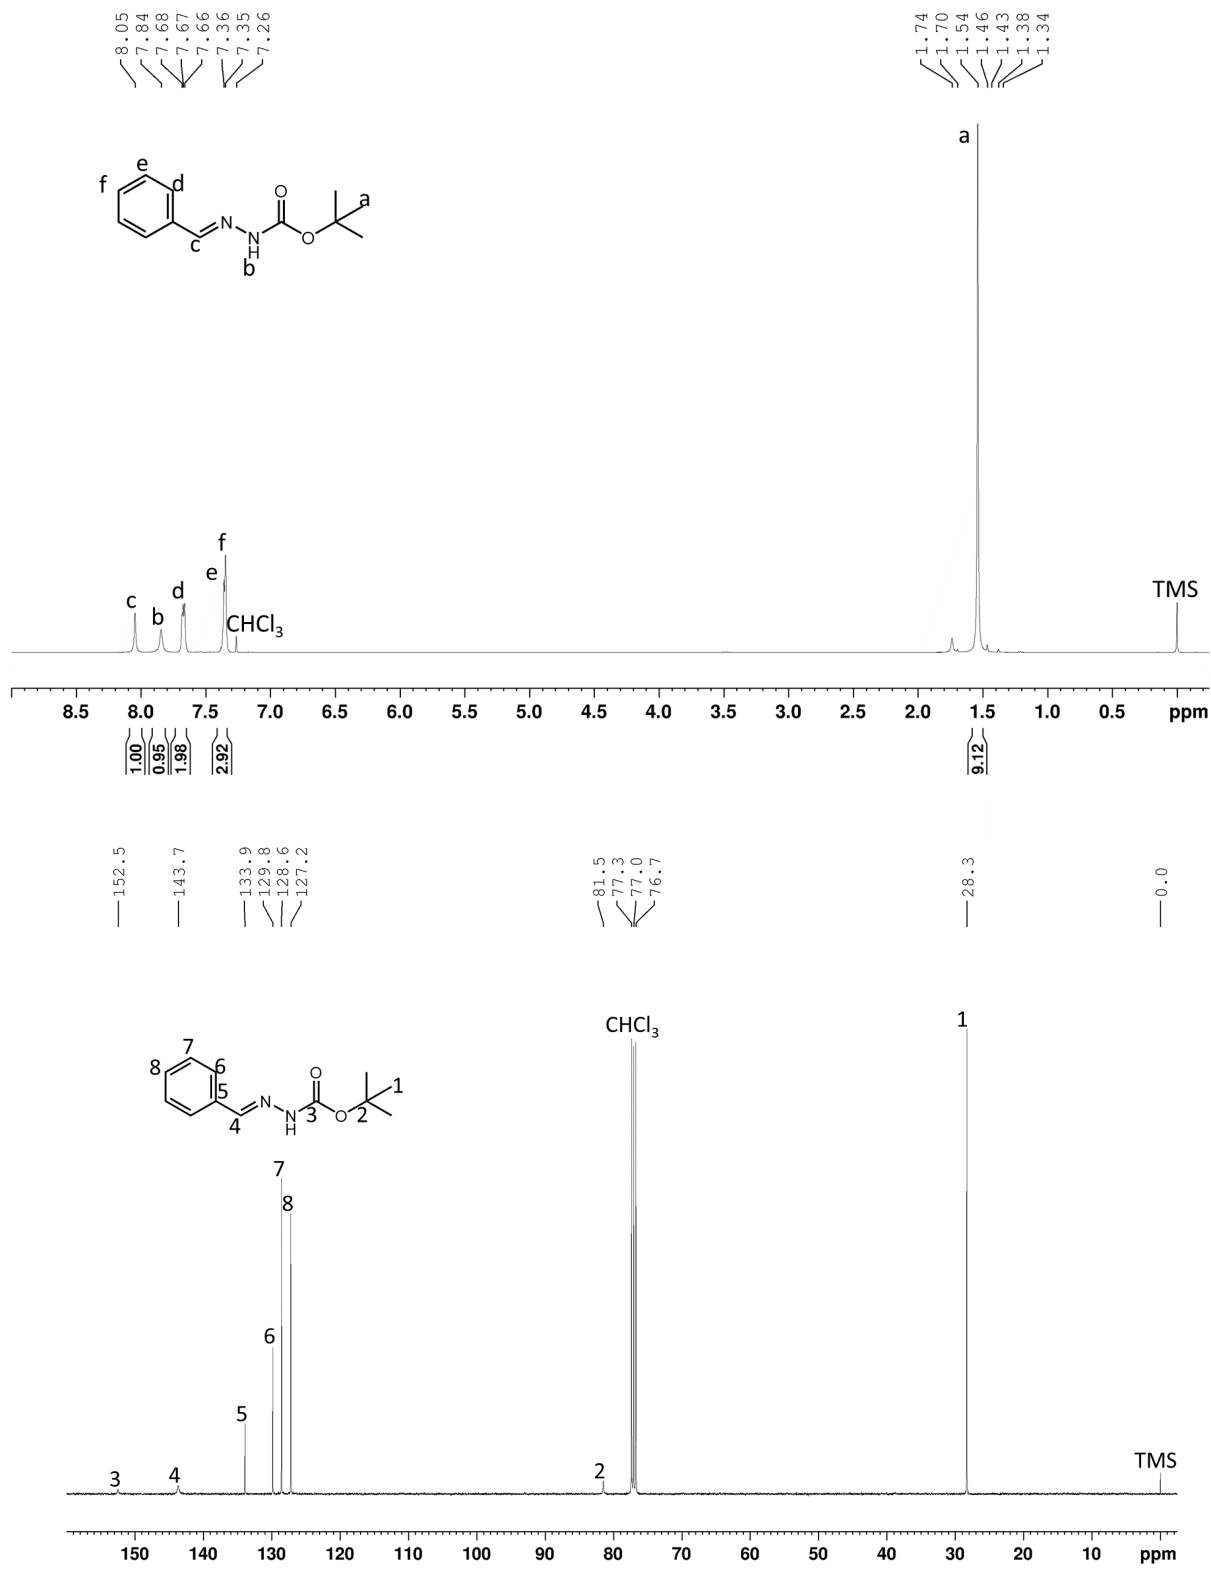

**Figure S58.** The 400MHz  $^1\text{H}$  and 100 MHz  $^{13}\text{C}$  NMR Spectra of *tert*-butyl 2-hexylhydrazonocarboxylate in  $\text{CDCl}_3$ .

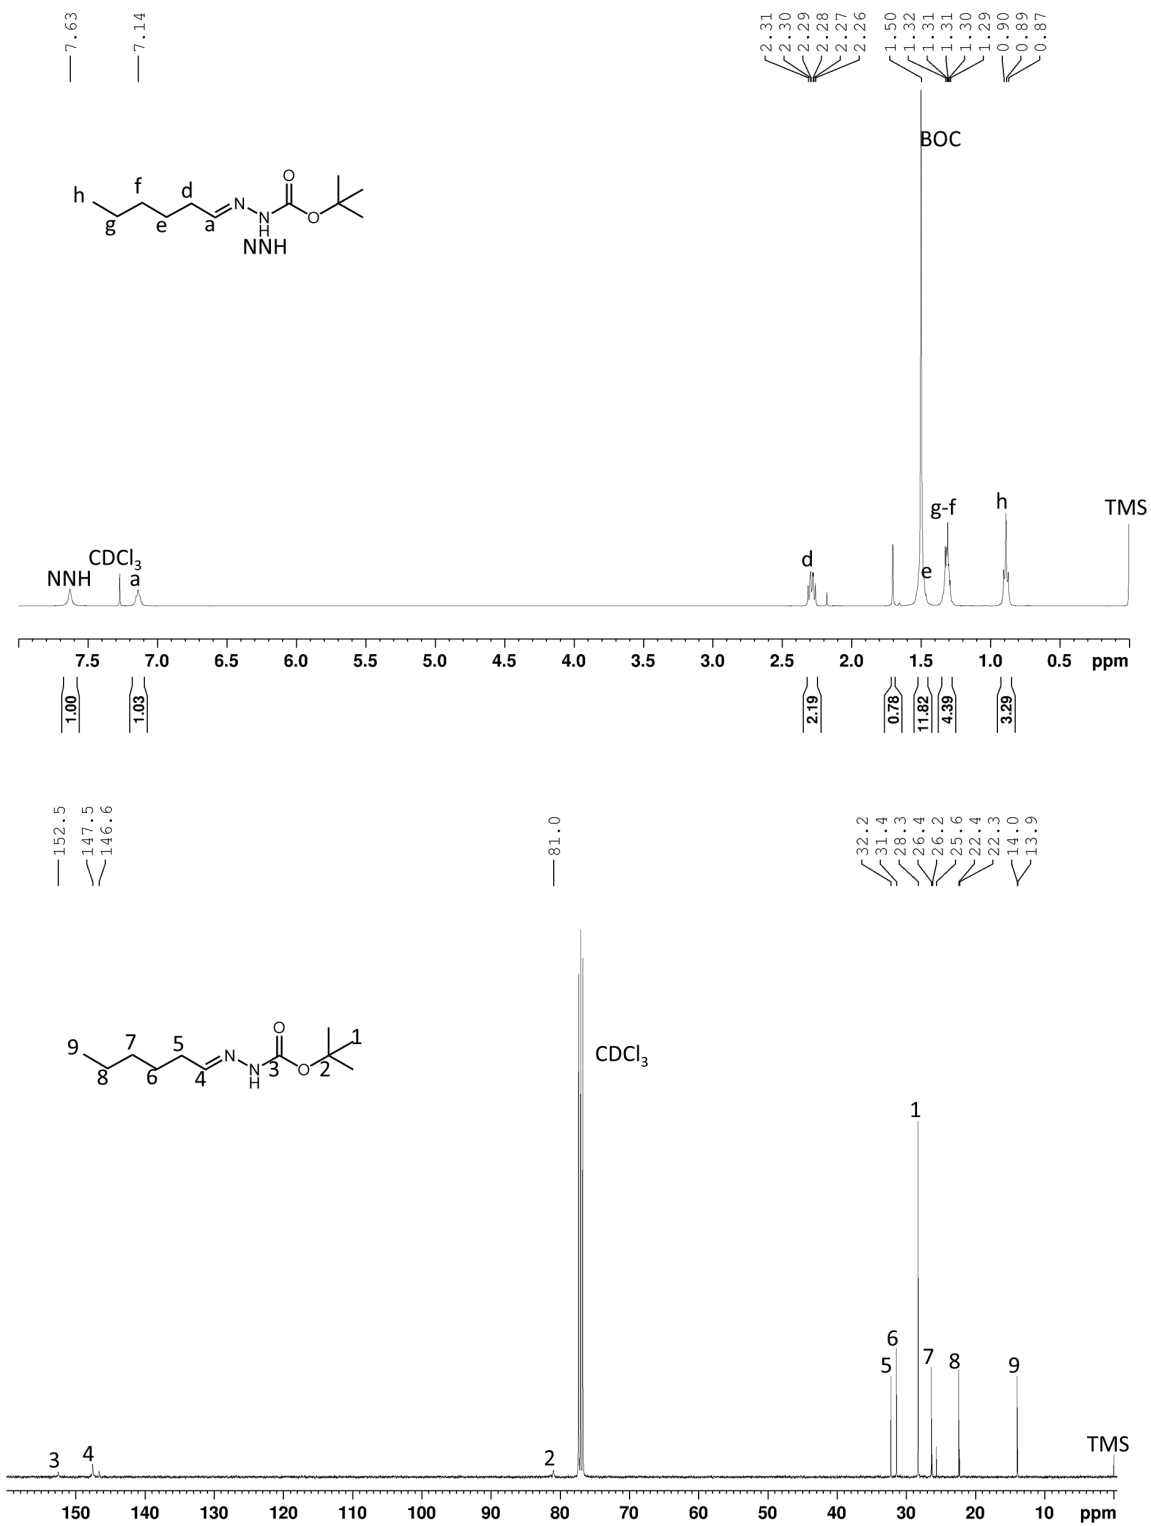

**Figure S59.** The 400 MHz  $^1\text{H}$  and 100 MHz  $^{13}\text{C}$  NMR Spectra of *tert*-butyl 2-benzylhydrazinecarboxylate in  $\text{CDCl}_3$ .

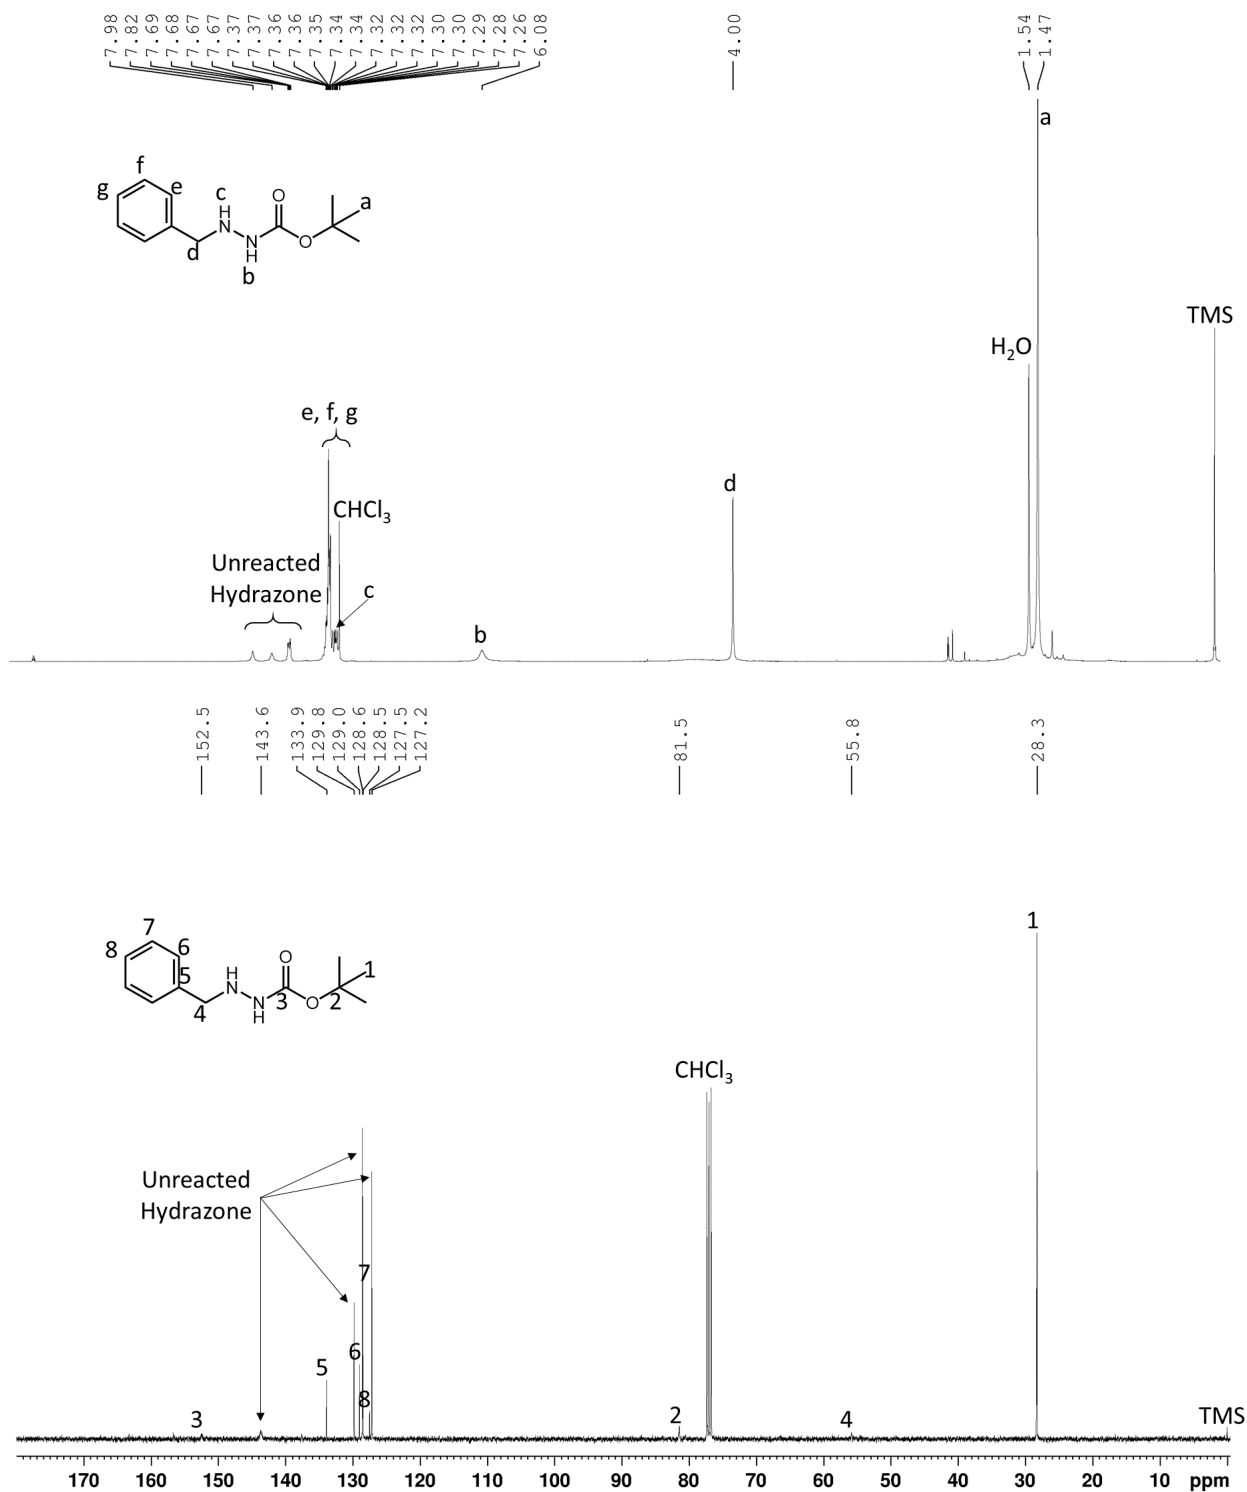

Figure S60. The 400 MHz  $^1\text{H}$  and 100 MHz  $^{13}\text{C}$  Spectra of *tert*-Butyl 2-hexylhydrazinecarboxylate in  $\text{CDCl}_3$ .

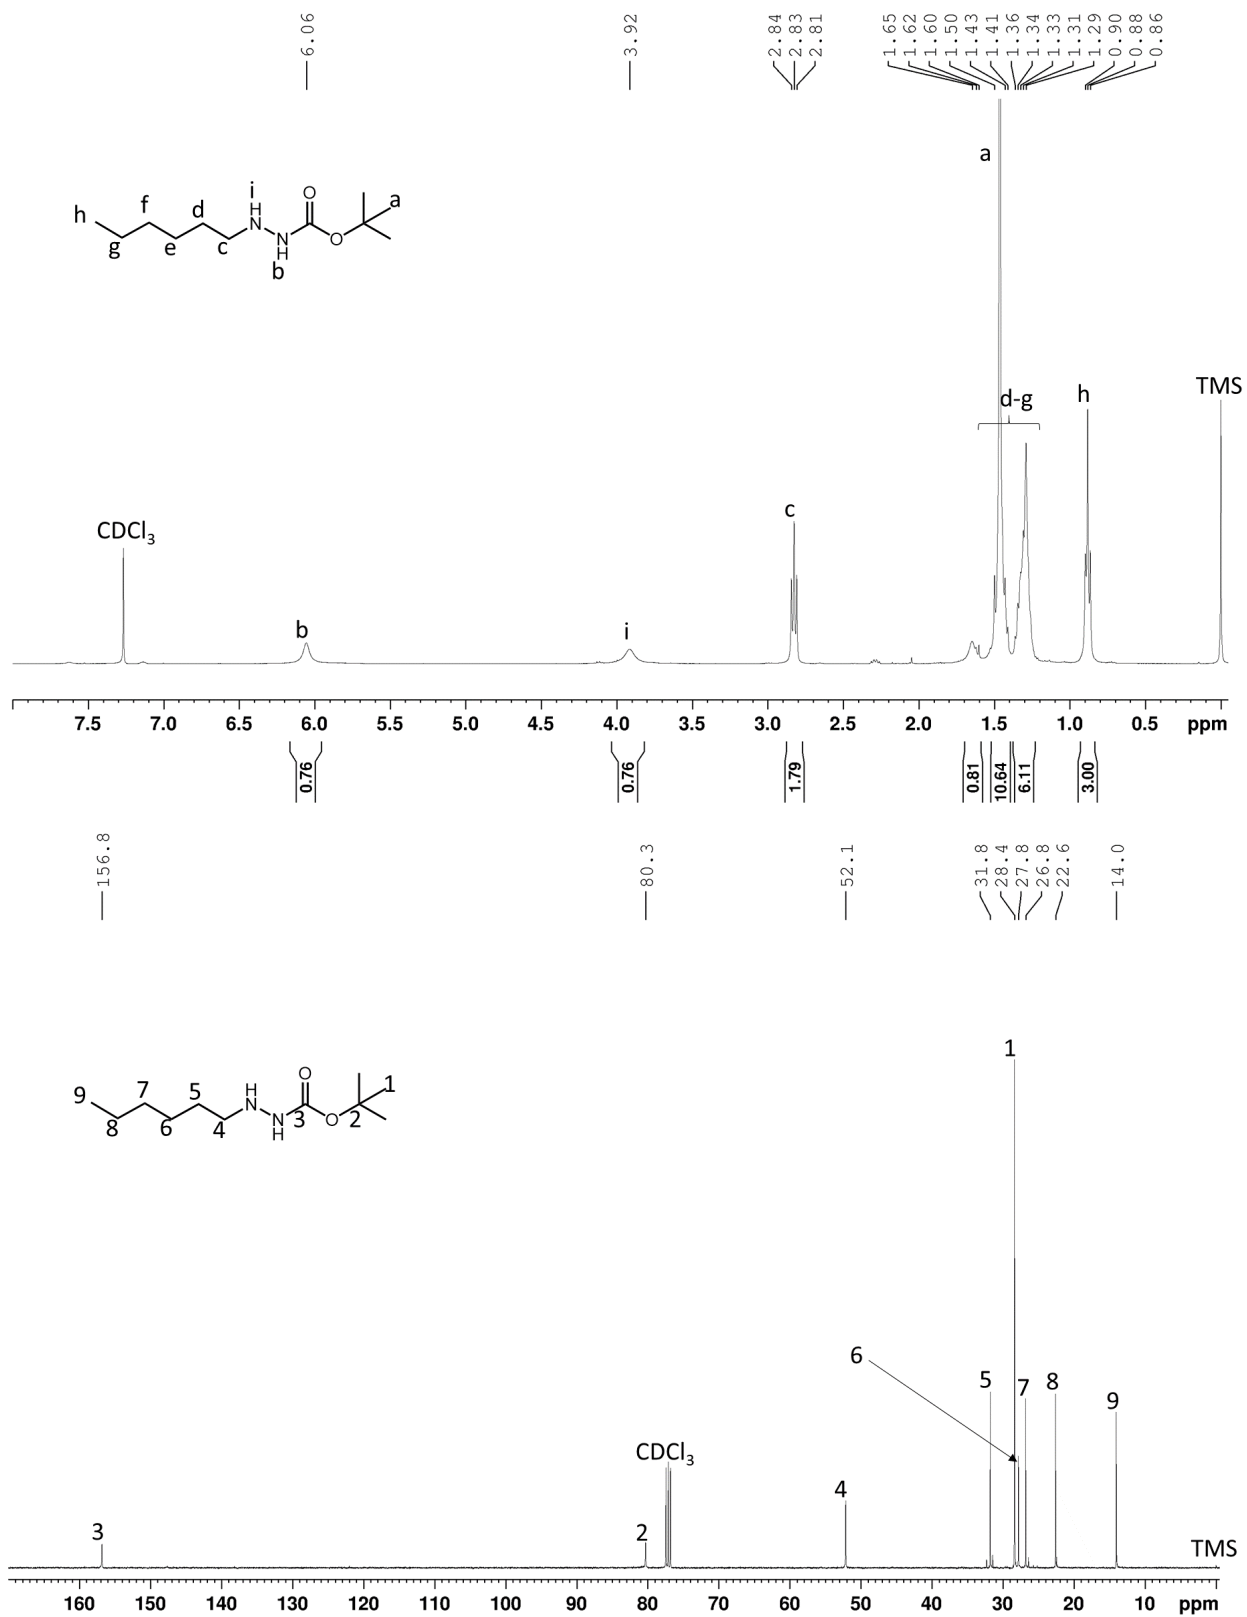



Figure S61. HRMS (ESI) of tert-butyl 2-hexylhydrazonocarboxylate.

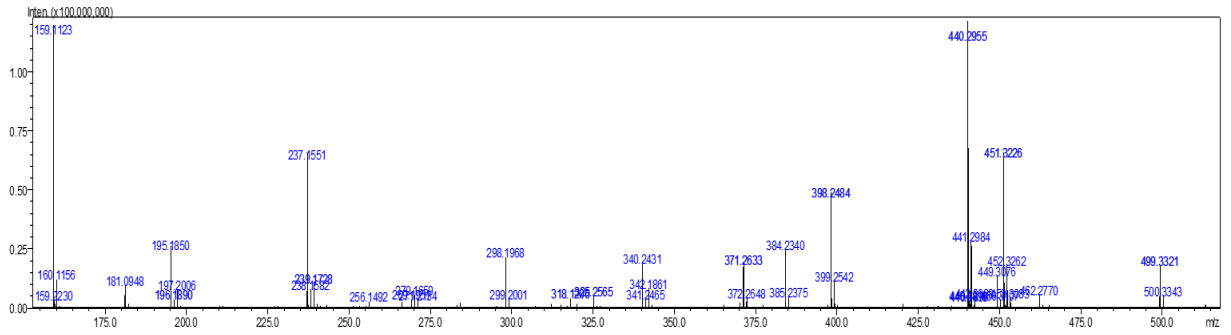

Figure S62. HRMS (ESI) of tert-butyl 2-hexylhydrazinecarboxylate.

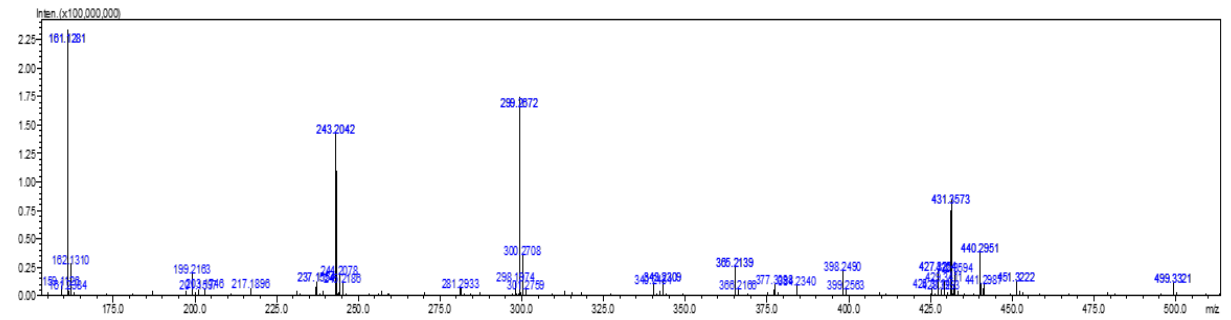

Figure S63. HRMS (ESI) of tert-Butyl 2-benzylhydrazinecarboxylate.

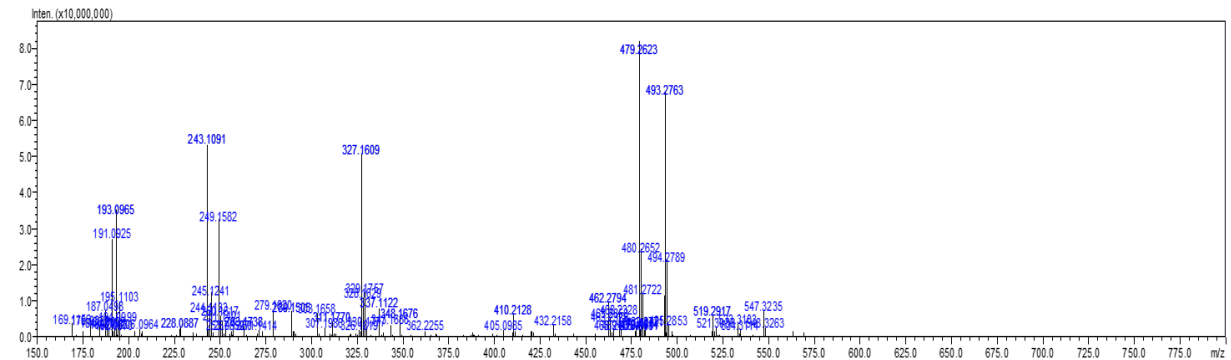

Figure S64. HRMS (ESI) of tert-butyl 2-benzylhydrazonocarboxylate.

| Elmt | Val. | Min | Max | Elmt | Val. | Min | Max | Elmt | Val. | Min | Max | Use Adduct |
|------|------|-----|-----|------|------|-----|-----|------|------|-----|-----|------------|
| H    | 1    | 0   | 300 | O    | 2    | 0   | 2   | S    | 2    | 0   | 0   | H          |
| C    | 4    | 0   | 12  | F    | 1    | 0   | 0   | Cu   | 2    | 0   | 0   | Na         |
| N    | 3    | 0   | 2   | Si   | 4    | 0   | 0   |      |      |     |     |            |

Error Margin (ppm): 10  
 HC Ratio: unlimited  
 Max Isotopes: all  
 MSn Iso RI (%): 75.00

DBE Range: -2.0 - 1000.0  
 Apply N Rule: yes  
 Isotope RI (%): 1.00  
 MSn Logic Mode: AND

Electron Ions: both  
 Use MSn Info: no  
 Isotope Res: 10000  
 Max Results: 500

Event#: 1 MS(E+) Ret. Time : 0.100 Scan# : 16

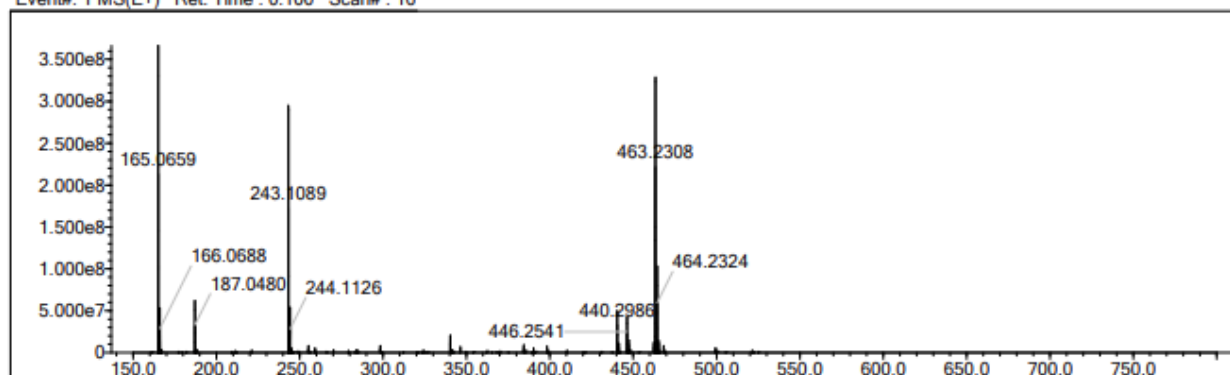

Measured region for 243.1089 m/z

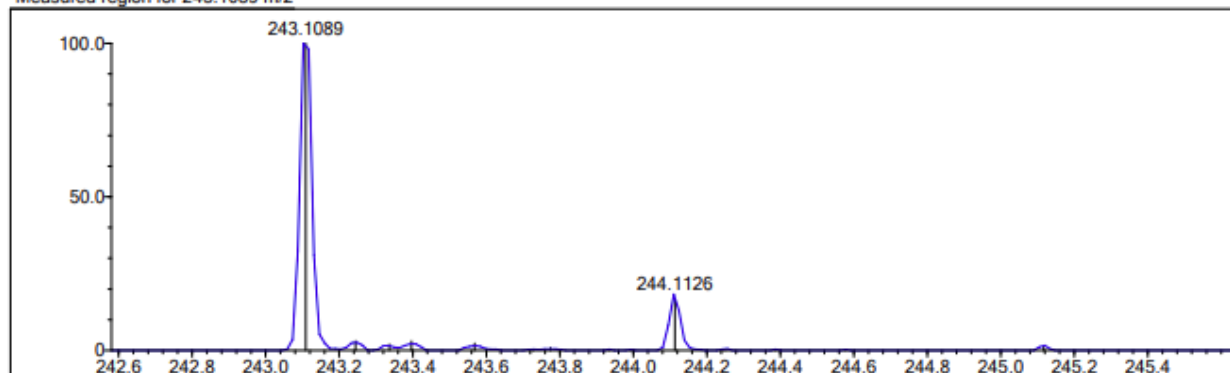

C12 H16 N2 O2 [M+Na]+ : Predicted region for 243.1104 m/z

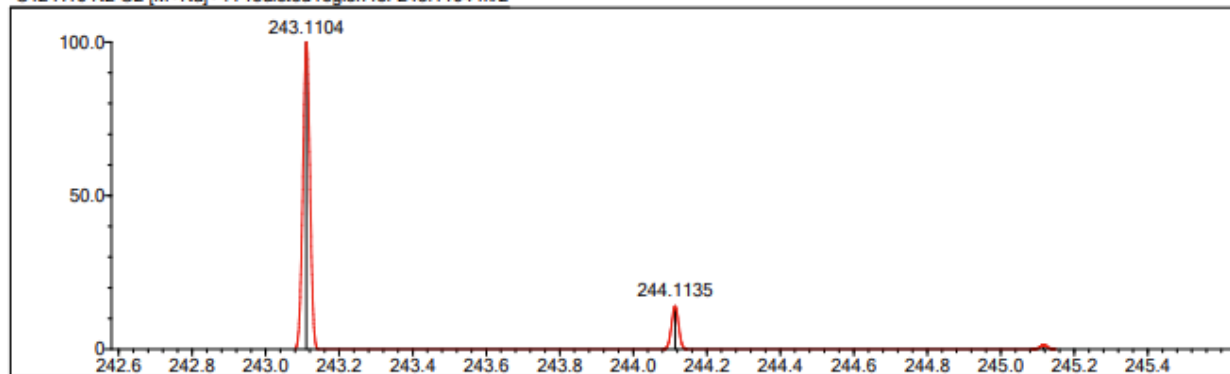

| Rank | Score | Formula (M)   | Ion     | Meas. m/z | Pred. m/z | Df. (mDa) | Df. (ppm) | Iso   | DBE |
|------|-------|---------------|---------|-----------|-----------|-----------|-----------|-------|-----|
| 1    | 74.81 | C12 H16 N2 O2 | [M+Na]+ | 243.1089  | 243.1104  | -1.5      | -6.17     | 95.54 | 6.0 |

## SYNTHESIS OF ESTERS

General synthesis of ester products derived from the synthesis of **G<sup>NNH<sub>x</sub></sup>-Ester**. Synthesis of the esters was conducted by a one-pot sequential addition to the starting cyanuric chloride as illustrated and described below.

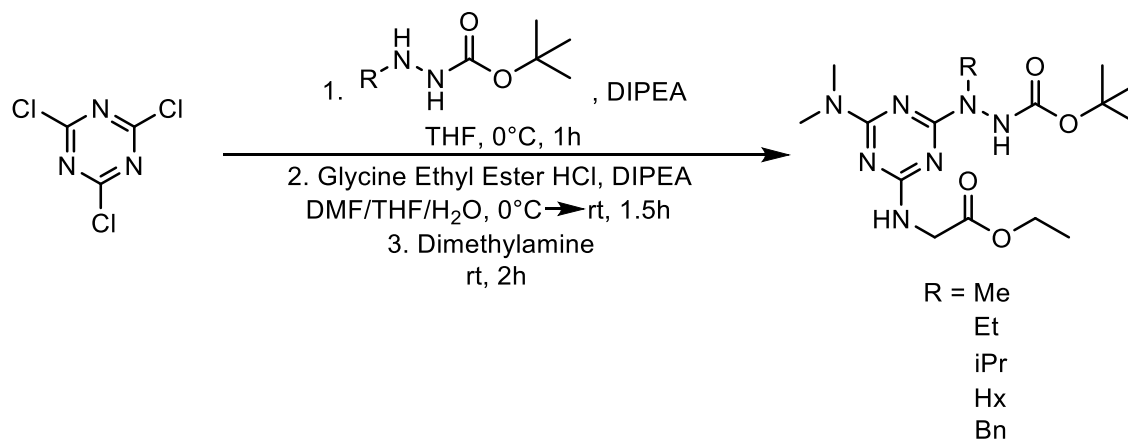

A round-bottom flask was charged with cyanuric chloride (0.2435 g, 1.3 mmol, 1 eq) in THF (13 mL, 0.1 M). The solution was cooled to 0°C with an ice/water bath. tert-Butyl 2-hexylhydrazinecarboxylate (0.2857 g, 1.3 mmol, 1 eq) in THF (13 mL, 0.1 M) and DIPEA (0.3426 g, 2.7 mmol, 2 eq) was then dripped in to the round-bottom flask at 1 drop/second. After the tert-butyl 2-hexylhydrazinecarboxylate had fully dripped in, the ice/water bath was removed. The reaction had finished after 2.5 hours. The reaction was then concentrated *via* rotary evaporation and resuspended in 6 mL of DMF (0.2 M) and cooled to 0°C with an ice/water bath. Glycine ethyl ester hydrochloride (0.1844 g, 1.3 mmol, 1 eq) in DMF (6 mL, 0.2 M) and DIPEA (0.3526 g, 2.7 mmol, 2 eq) was then dripped into the round-bottom flask at 1 drop/second. Deionized water was dripped in to the reaction to solubilize the glycine ethyl ester hydrochloride (~1.5 mL). Once the glycine ethyl ester hydrochloride solution had fully dripped in, the ice/water bath was removed. After an hour of reaction time, extra DIPEA (0.3891 g, 3.0 mmol, 2.3 eq) was added to the reaction to bring the pH to 10. The reaction finished after 1.5 hours. Dimethylamine 40% in water (0.1693 g of the 40% solution, 1.5 mmol, 1.1 eq) was then added to the round-bottom flask. After 40 minutes of stirring, DIPEA (0.1875 g, 1.5 mmol, 1.1 eq) was added to bring the pH from 7 to 8. Extra dimethylamine (0.1081 g of the 40% solution, 1.0 mmol, 0.7 eq) was added after 1.5 hours of reacting. The reaction finished after 2 hours of stirring. The solvent was removed by rotary evaporation and extracted thrice with 75 mL of ethyl acetate and 70 mL of brine. The organic layer was collected and dried with magnesium sulfate and filtered. The ethyl acetate was then removed *via* rotary evaporation, affording crude **G<sup>NNH<sub>x</sub></sup>-Ester**. The crude mixture was purified *via* column chromatography with 75 mL SiO<sub>2</sub> and 25% ethyl acetate in hexanes, affording pure **G<sup>NNH<sub>x</sub></sup>-Ester** (0.479 g, 1.1 mmol, 83% yield).

HRMS (ESI) m/z: [M + H]<sup>+</sup> Calculated for C<sub>20</sub>H<sub>37</sub>N<sub>7</sub>O<sub>4</sub> 440.2980; Found 440.2961

$^1\text{H}$  NMR (DMSO, 400 MHz):  $\delta$  8.92 – 8.31 (s, 1 H), 7.30 – 6.85 (m, 1 H), 4.07 (m, 2 H), 3.85 (d,  $J$  = 5.6 Hz, 2 H), 3.63 – 3.46 (m, 2 H), 3.00 (s, 6 H), 1.54 – 1.37 (m, 2 H), 1.40 (s, 9 H), 1.32 – 1.21 (m, 6 H), 1.17 (m, 3 H), 0.85 (m, 3 H).

$^{13}\text{C}\{^1\text{H}\}$  NMR (DMSO, 100 MHz):  $\delta$  170.8, 166.6, 165.9, 165.1, 155.5, 78.8, 60.0, 48.7, 42.4, 35.4, 35.2, 31.1, 30.9, 28.1, 27.0, 25.8, 14.2, 14.1.

**G<sup>NNEt</sup>-Ester:** A round-bottom flask was charged with cyanuric chloride (0.1964 g, 1.1 mmol, 1 eq) in THF (12 mL, 0.1 M). The solution was cooled to 0°C with an ice/water bath. tert-Butyl 2-ethylhydrazinecarboxylate (0.1706 g, 1.1 mmol, 1 eq) in THF (12 mL, 0.1 M) and DIPEA (0.3031 g, 2.4 mmol, 2.2 eq) was then dripped into the round-bottom flask at 1 drop/second. 15 minutes after the tert-butyl 2-ethylhydrazinecarboxylate had fully dripped in, the ice/water bath was removed. The reaction had finished after 1 hour. The reaction was then concentrated *via* rotary evaporation and resuspended in 5.5 mL of DMF (0.2 M) and cooled to 0°C with an ice/water bath. Glycine ethyl ester hydrochloride (0.1486 g, 1.1 mmol, 1 eq) in DMF (5.5 mL, 0.2 M) and DIPEA (0.5585 g, 4.3 mmol, 4.1 eq) was then dripped into the round-bottom flask at 1 drop/second. The ice/water bath was removed an hour after the glycine ethyl ester solution had dripped in. The reaction finished after 1.5 hours. Dimethylamine 40% in water (0.2489 g of the 40% solution, 2.2 mmol, 2 eq) was then added to the round-bottom flask. The reaction finished after 1.5 hours of stirring. The solvent was removed by rotary evaporation and extracted thrice with 75 mL of ethyl acetate and 75 mL of brine. The organic layer was collected and dried with magnesium sulfate and filtered. The ethyl acetate was then removed *via* rotary evaporation, affording crude **G<sup>NNEt</sup>-Ester**. The crude mixture was purified *via* column chromatography with 75 mL SiO<sub>2</sub> and 25% to 50% ethyl acetate in hexanes, affording pure **G<sup>NNEt</sup>-Ester** (0.325 g, 0.85 mmol, 80% yield).

HRMS (ESI)  $m/z$ :  $[M + H]^+$  Calculated for C<sub>16</sub>H<sub>29</sub>N<sub>7</sub>O<sub>4</sub> 384.2354; Found 384.2337

$^1\text{H}$  NMR (DMSO, 400 MHz):  $\delta$  8.92 – 8.28 (s, 1 H), 7.30 – 6.91 (m, 1 H), 4.07 (m, 2 H), 3.85 (d,  $J$  = 5.2 Hz, 2 H), 3.66 – 3.51 (m, 2 H), 3.00 (s, 6 H), 1.45 – 1.22 (s, 9 H), 1.17 (m, 3 H), 1.11 – 0.80 (m, 3 H).

$^{13}\text{C}\{^1\text{H}\}$  NMR (DMSO, 100 MHz):  $\delta$  170.4, 166.1, 165.7, 165.1, 155.6, 78.8, 60.0, 42.6, 35.4, 35.2, 28.2, 14.2, 12.5.

**G<sup>NNMe</sup>-Ester:** A round-bottom flask was charged with cyanuric chloride (0.2495 g, 1.4 mmol, 1 eq) in THF (14 mL, 0.1 M) and cooled to 0°C with an ice/water bath. tert-Butyl 2-methylhydrazinecarboxylate (0.1978, 1.4 mmol, 1 eq) and DIPEA (0.4203 g, 3.3 mmol, 2.4 eq) in THF (14 mL, 0.1 M) was then added dropwise *via* a pressure-equalized addition funnel at a rate of 1 drop/second. The reaction finished 15 minutes after the hydrazine finished dripping in. Excess THF was then removed *via* rotary evaporation, and the reaction was then resuspended in THF (7 mL, 0.2 M). Glycine ethyl ester hydrochloride (0.1890 g, 1.4 mmol, 1 eq) and DIPEA (1.0470 g, 8.1 mmol, 6 eq) in methanol (7 mL, 0.2 M) was then added dropwise to the initial reaction in a 10°C water bath. The ice bath was removed 20 minutes after the glycine finished dripping in. The reaction finished after another 2 hours. Dimethylamine 40% in water (0.4410 g of the 40% solution, 3.9 mmol, 2.9 eq) was then added to the round-bottom flask. The reaction finished after 1.5 hours. The reaction was then concentrated down *via* rotary evaporation and was extracted with 50 mL ethyl acetate and 100 mL of water, followed by 50 mL of brine. The organic layer was collected and dried with

magnesium sulfate and filtered. The filtrate was collected and crude **G<sup>NNMe</sup>-Ester** was obtained after rotary evaporation. The crude reaction was then purified with column chromatography using 50 mL of SiO<sub>2</sub> and 5% methanol in chloroform, affording pure **G<sup>NNMe</sup>-Ester** (0.468 g, 1.3 mmol, 94% yield).

HRMS (ESI) m/z: [M + H]<sup>+</sup> Calculated for C<sub>15</sub>H<sub>27</sub>N<sub>7</sub>O<sub>4</sub> 370.2197; Found 370.2182

<sup>1</sup>H NMR (DMSO, 400 MHz): δ 8.99 – 8.42 (s, 1 H), 7.28 – 6.97 (m, 1 H), 4.08 (q, *J* = 7.0 Hz, 2 H), 3.85 (m, 2 H), 3.18 – 3.07 (s, 3 H), 3.00 (s, 6 H), 1.43 – 1.26 (s, 9 H), 1.17 (t, *J* = 7.0 Hz, 3 H).

<sup>13</sup>C{<sup>1</sup>H} NMR (DMSO, 100 MHz): δ 170.8, 166.9, 165.5, 165.1, 155.3, 79.0, 60.0, 42.6, 37.4, 35.2, 28.2, 14.2.

**G<sup>NNiPr</sup>-Ester**: Cyanuric chloride (0.5293 g, 2.9 mmol, 1 eq) in THF (30 mL, 0.1 M) was charged to a round-bottom flask and cooled to 0°C with an ice/water bath. tert-Butyl 2-isopropylhydrazinecarboxylate (0.5005 g, 2.9 mmol, 1 eq) and DIPEA (0.8247 g, 6.4 mmol, 2.2 eq) in THF (30 mL, 0.1 M) was then dripped in to the round-bottom flask at a rate of 1 drop/second. The water/ice bath was removed after the tert-Butyl 2-isopropylhydrazinecarboxylate solution finished adding. The reaction was left to go for 2 hours, after which the reaction had finished. The solution was then concentrated *via* rotary evaporation and then resuspended in DMF (15 mL, 0.2 M). Glycine ethyl ester hydrochloride (0.4008 g, 2.9 mmol, 1 eq) and DIPEA (1.1247 g, 8.7 mmol, 3 eq) in 2:1 DMF:MeOH (15 mL, 0.2 M) was then added dropwise to the round-bottom flask. The reaction finished after 1.5 hours of stirring. Dimethylamine 40% in water (0.6600 g of the 40% solution, 5.9 mmol, 2 eq) was then added to the round-bottom flask *via* pipette. The reaction had finished by TLC after 1.5 hours of stirring. The reaction was then concentrated down to 10 mL *via* rotary evaporation and extracted thrice with 50 mL ethyl acetate and 50 mL water. The organic layer was collected and dried with magnesium sulfate and then filtered. Solvent from the dried organic layer was then removed *via* rotary evaporation, affording crude **G<sup>NNiPr</sup>-Ester**. The crude product was purified with column chromatography, using 200 mL SiO<sub>2</sub> and 7:2 hexanes:ethyl acetate, affording pure **G<sup>NNiPr</sup>-Ester** (0.620 g, 1.6 mmol, 54% yield). Some fractions were contaminated with the monochlorotriazine (i.e., the intermediate that precedes the addition of dimethylamine), which upon inclusion with the pure **G<sup>NNiPr</sup>-Ester** gives an adjusted crude yield of 1.108 g (2.8 mmol, 97% yield)

HRMS (ESI) m/z: [M + H]<sup>+</sup> Calculated for C<sub>17</sub>H<sub>31</sub>N<sub>7</sub>O<sub>4</sub> 398.2483; Found 398.2465

<sup>1</sup>H NMR (DMSO, 400 MHz): δ 8.56 – 8.03 (s, 1 H), 7.24 – 6.83 (m, 1 H), 4.88 – 4.64 (m, 1 H), 4.11 – 4.02 (m, 2 H), 3.85 (m, 2 H), 3.00 (s, 6 H), 1.44 – 1.22 (s, 9 H), 1.21 – 0.80 (m, 9 H).

<sup>13</sup>C{<sup>1</sup>H} NMR (DMSO, 100 MHz): δ 170.8, 170.4, 165.7, 165.5, 156.2, 78.6, 60.0, 46.8, 42.7, 35.4, 28.2, 19.4, 14.2.

**G<sup>NNBn</sup>-Ester**: Cyanuric chloride (0.4547 g, 2.5 mmol, 1 eq) in THF (25 mL, 0.1 M) was charged to a round-bottom flask and cooled to 0°C with an ice/water bath. tert-Butyl 2-benzylhydrazinecarboxylate (0.5466 g, 2.5 mmol, 1 eq) in THF (25 mL, 0.1 M) and DIPEA (0.9526 g, 7.4 mmol, 3 eq) was then added dropwise to the round-bottom flask at a rate of 1 drop/second. The ice/water bath was removed after the hydrazine had finished dripping in, was left to stir for another 45 minutes. The reaction was then concentrated down *via* rotary evaporation and then resuspended in 12 mL of THF (0.2 M). The reaction was cooled to 0°C with

an ice/water bath. Glycine ethyl ester hydrochloride (0.3443 g, 2.5 mmol, 1 eq) in methanol (12 mL, 0.2 M) and DIPEA (0.9630, 7.5 mmol, 3 eq) was then added dropwise to the round-bottom flask. The ice/water bath was removed after 15 minutes of stirring. The reaction had finished after 40 minutes of stirring. Dimethylamine 40% in water (0.5609 g of the 40% solution, 4.9 mmol, 2 eq) was then added to the round-bottom flask at room temperature. The reaction finished after 1.25 hours of stirring. The reaction was concentrated *via* rotary evaporation and was extracted thrice with 50 mL of water and 50 mL of ethyl acetate. The organic layer was collected and dried with magnesium sulfate and concentrated down *via* rotary evaporation, affording crude **G<sup>NNBn</sup>-Ester**. Column chromatography with 75 mL SiO<sub>2</sub> and 25% ethyl acetate in hexanes afforded pure **G<sup>NNBn</sup>-Ester** (0.2952 g, 0.66 mmol, 27% yield) as a clear oil.

HRMS (ESI) m/z: [M + H]<sup>+</sup> Calculated for C<sub>21</sub>H<sub>31</sub>N<sub>7</sub>O<sub>4</sub> 446.2510; Found 446.2494

<sup>1</sup>H NMR (CD<sub>3</sub>OD, 400 MHz): δ 7.39 – 7.19 (m, 5 H), 4.22 – 3.96 (m, 6 H), 3.08 (s, 6 H), 1.51 – 1.27 (s, 9 H), 1.24 (m, 3 H).

<sup>13</sup>C{<sup>1</sup>H} NMR (CD<sub>3</sub>OD, 100 MHz): δ 173.0, 167.7, 166.9, 163.1, 158.5, 139.4, 129.8, 129.3, 128.1, 81.5, 62.0, 53.7, 43.9, 36.4, 36.2, 30.8, 14.5.

Figure S65. The 400 MHz  $^1\text{H}$  and 100 MHz  $^{13}\text{C}$  NMR Spectra of  $\text{G}^{\text{NNMe}}$ -Ester in DMSO.

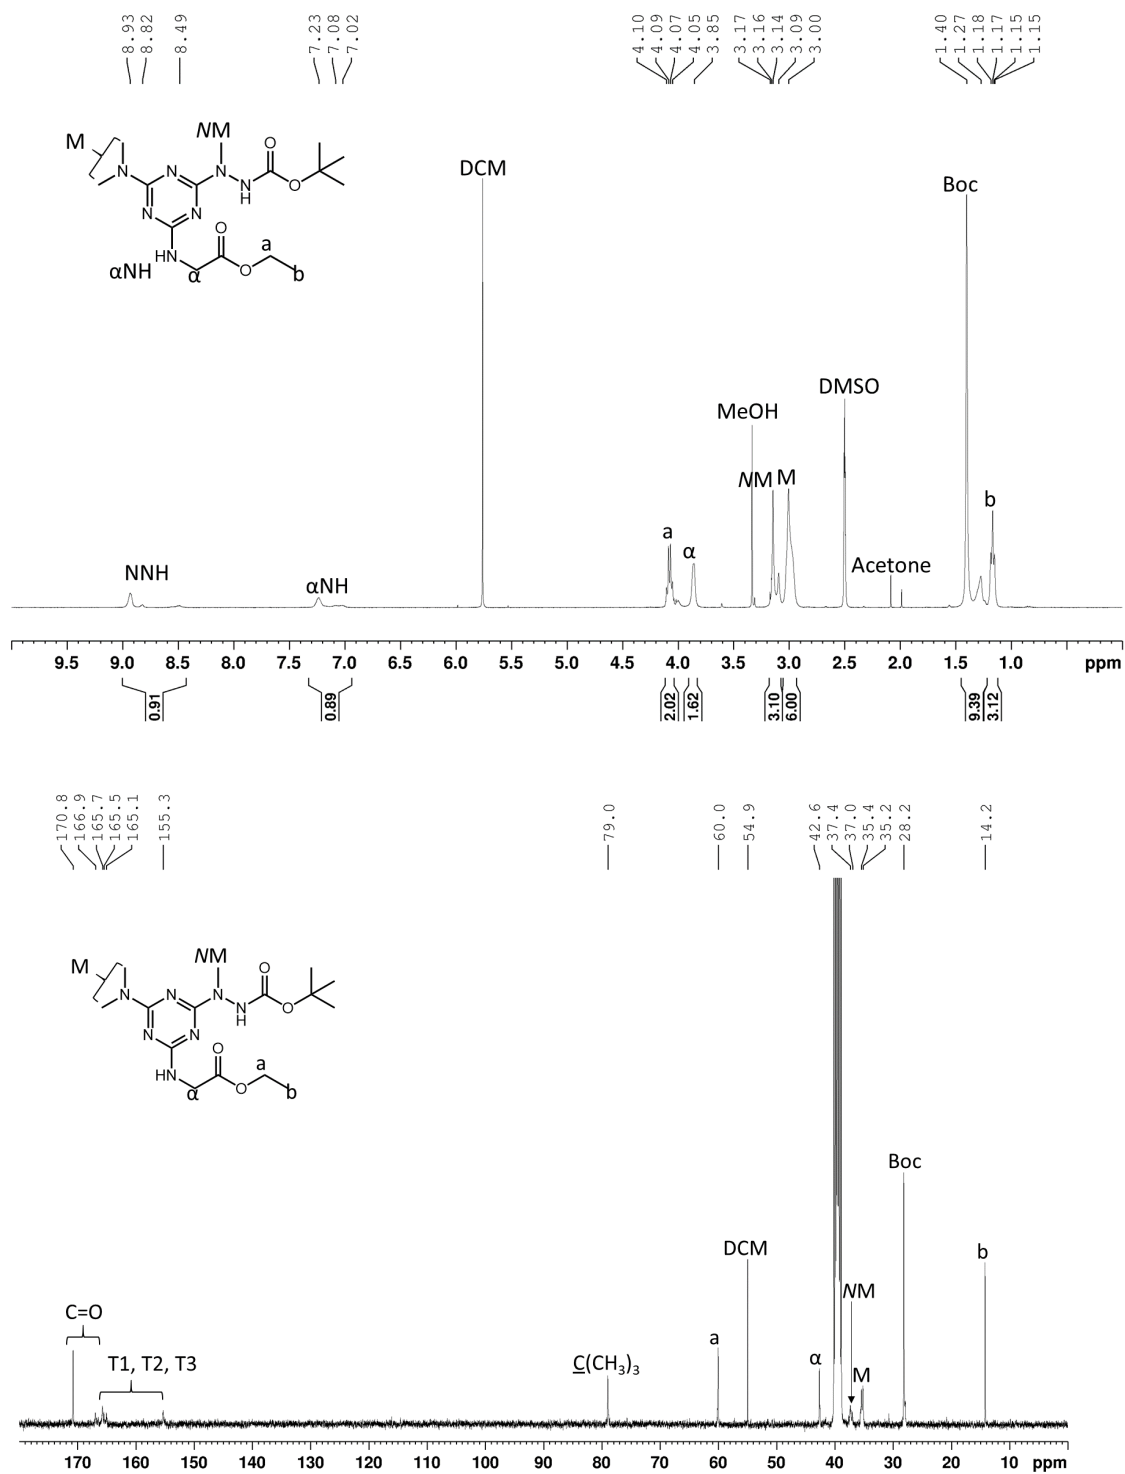

Figure S66. The 400 MHz  $^1\text{H}$  and 100 MHz  $^{13}\text{C}$  NMR Spectra of  $\text{G}^{\text{NNEt}}$ -Ester in DMSO.

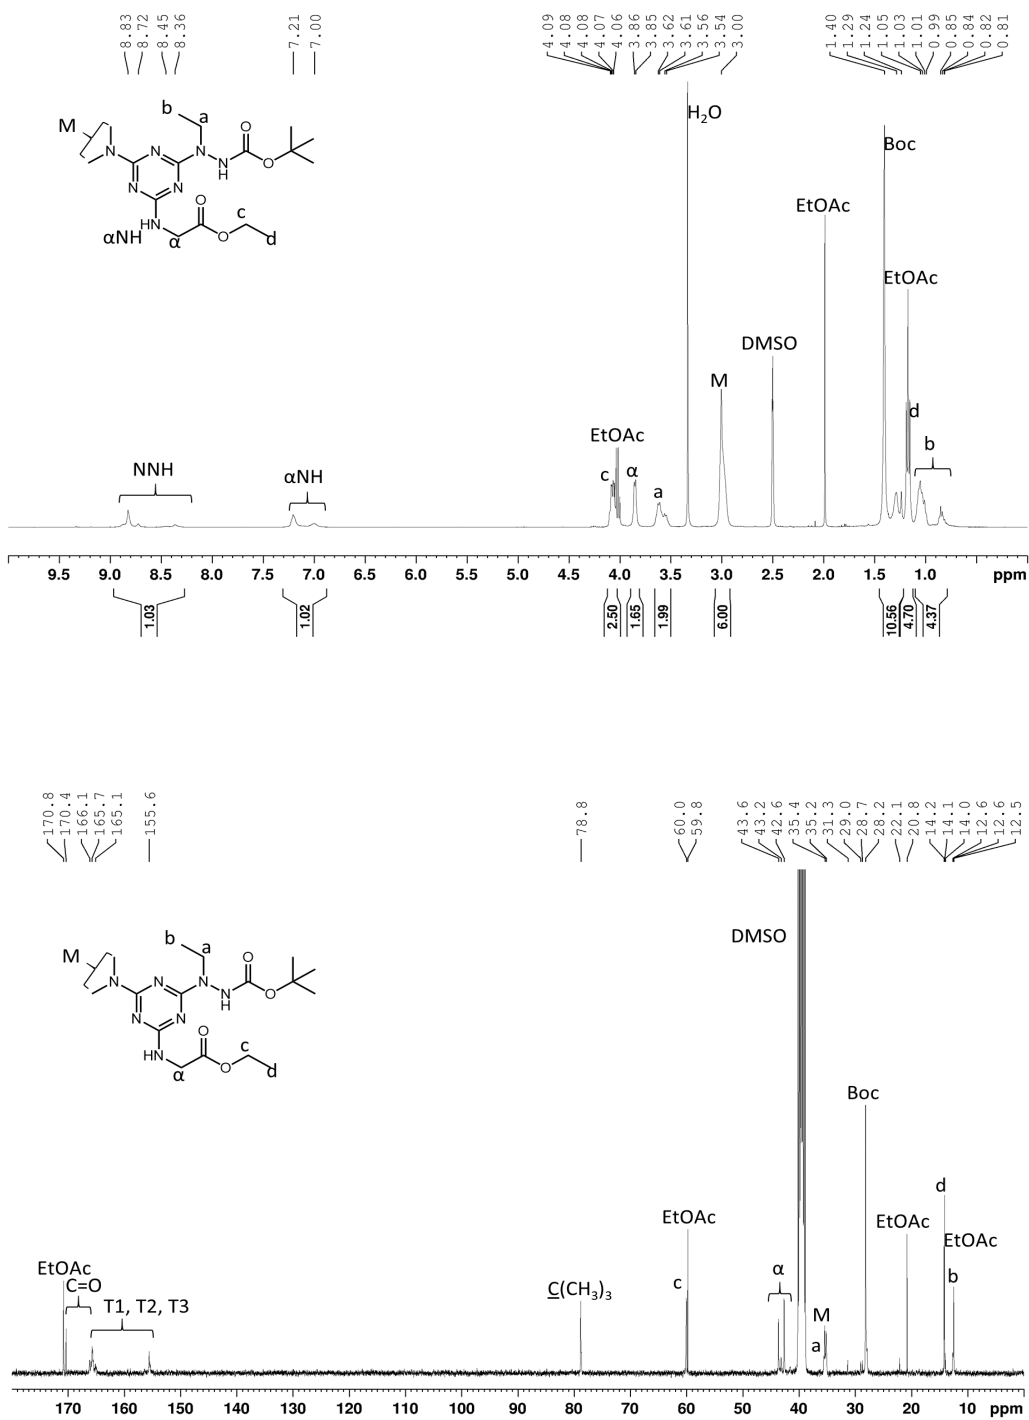



Figure S67. The 400 MHz  $^1\text{H}$  and 100 MHz  $^{13}\text{C}$  NMR Spectra of  $\text{G}^{\text{NNiPr}}$ -Ester in DMSO.

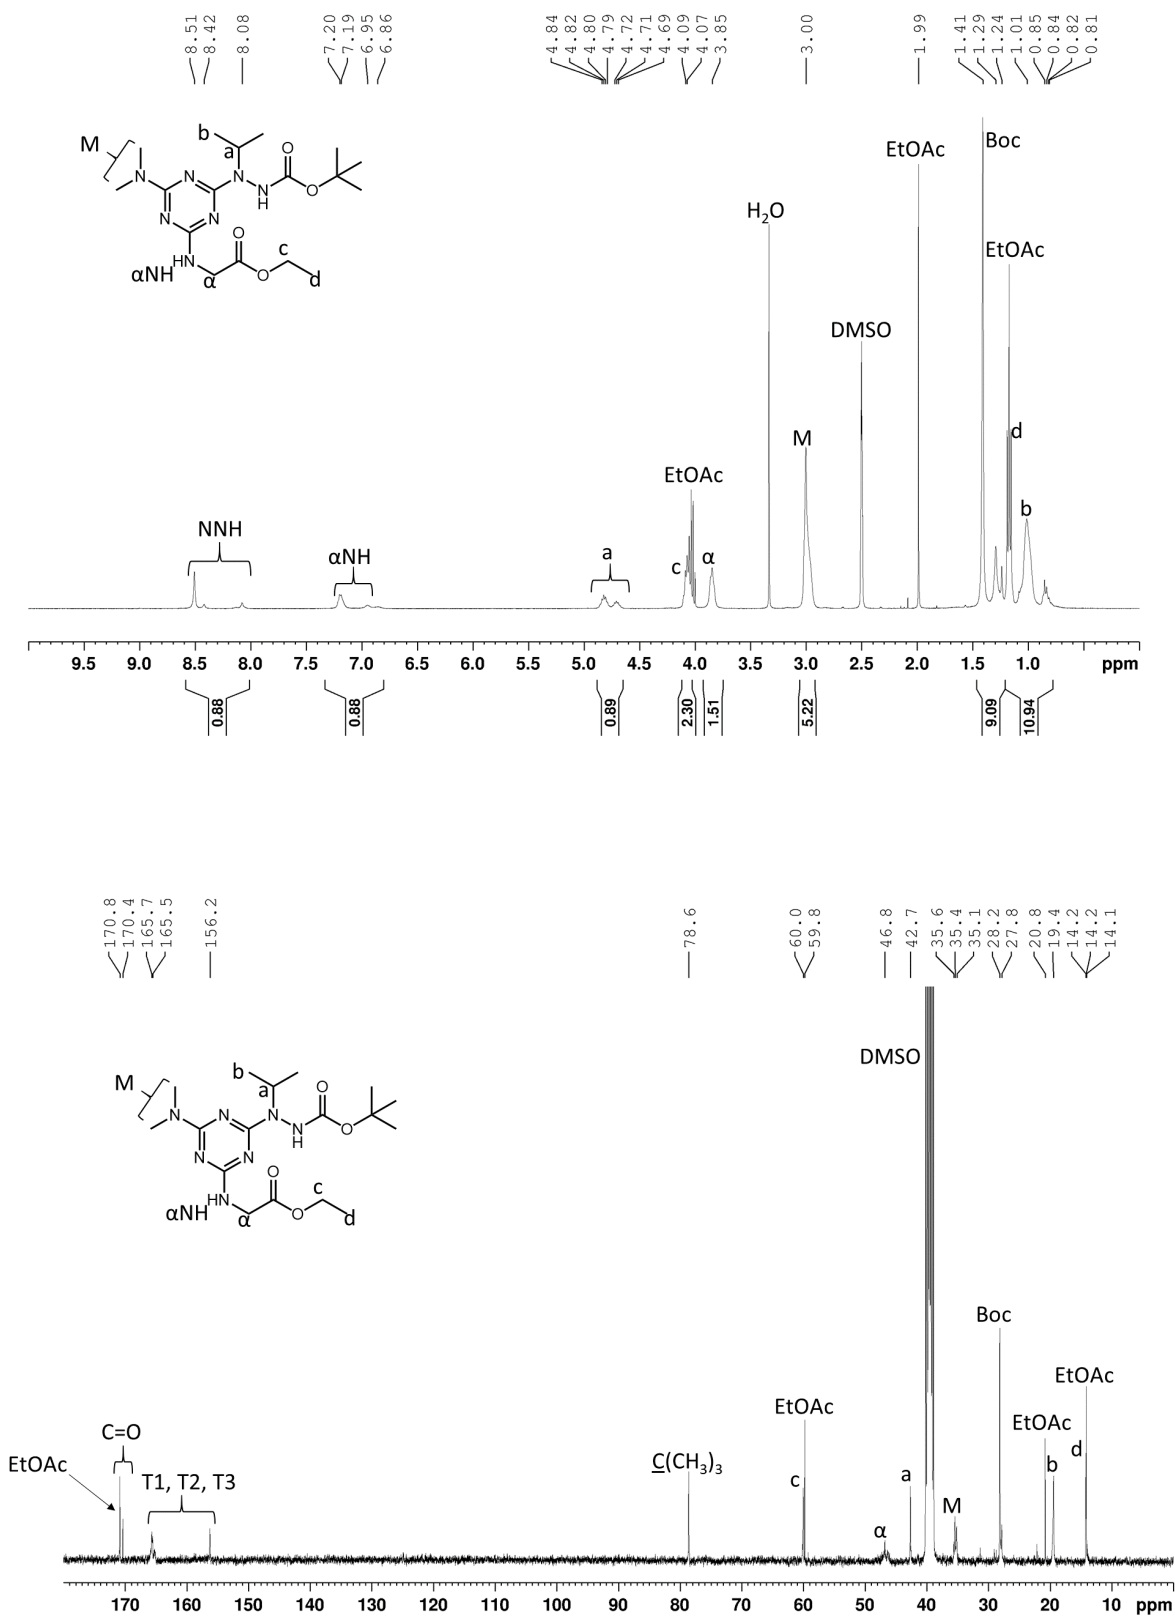

Figure S68. The 400 MHz  $^1\text{H}$  and 100 MHz  $^{13}\text{C}$  NMR Spectra of  $\text{G}^{\text{NNBn}}$ -Ester in  $\text{CD}_3\text{OD}$ .

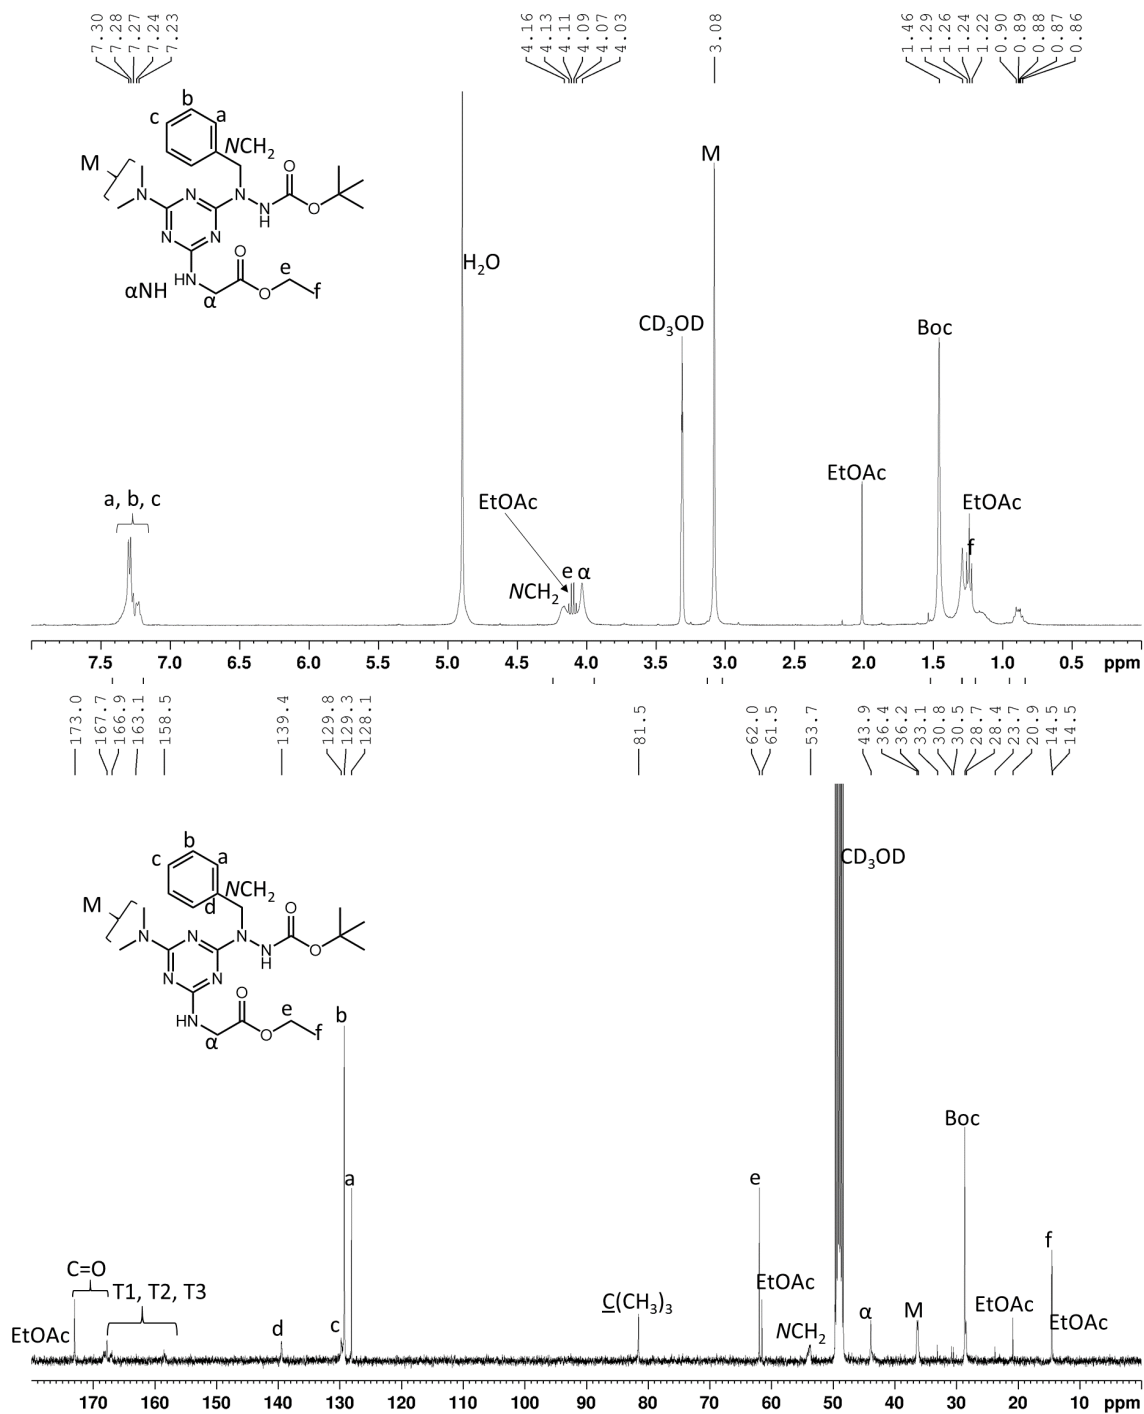

Figure S69. The 400 MHz  $^1\text{H}$  and 100 MHz  $^{13}\text{C}$  NMR Spectra of  $\text{G}^{\text{NNHx}}$ -Ester in DMSO.

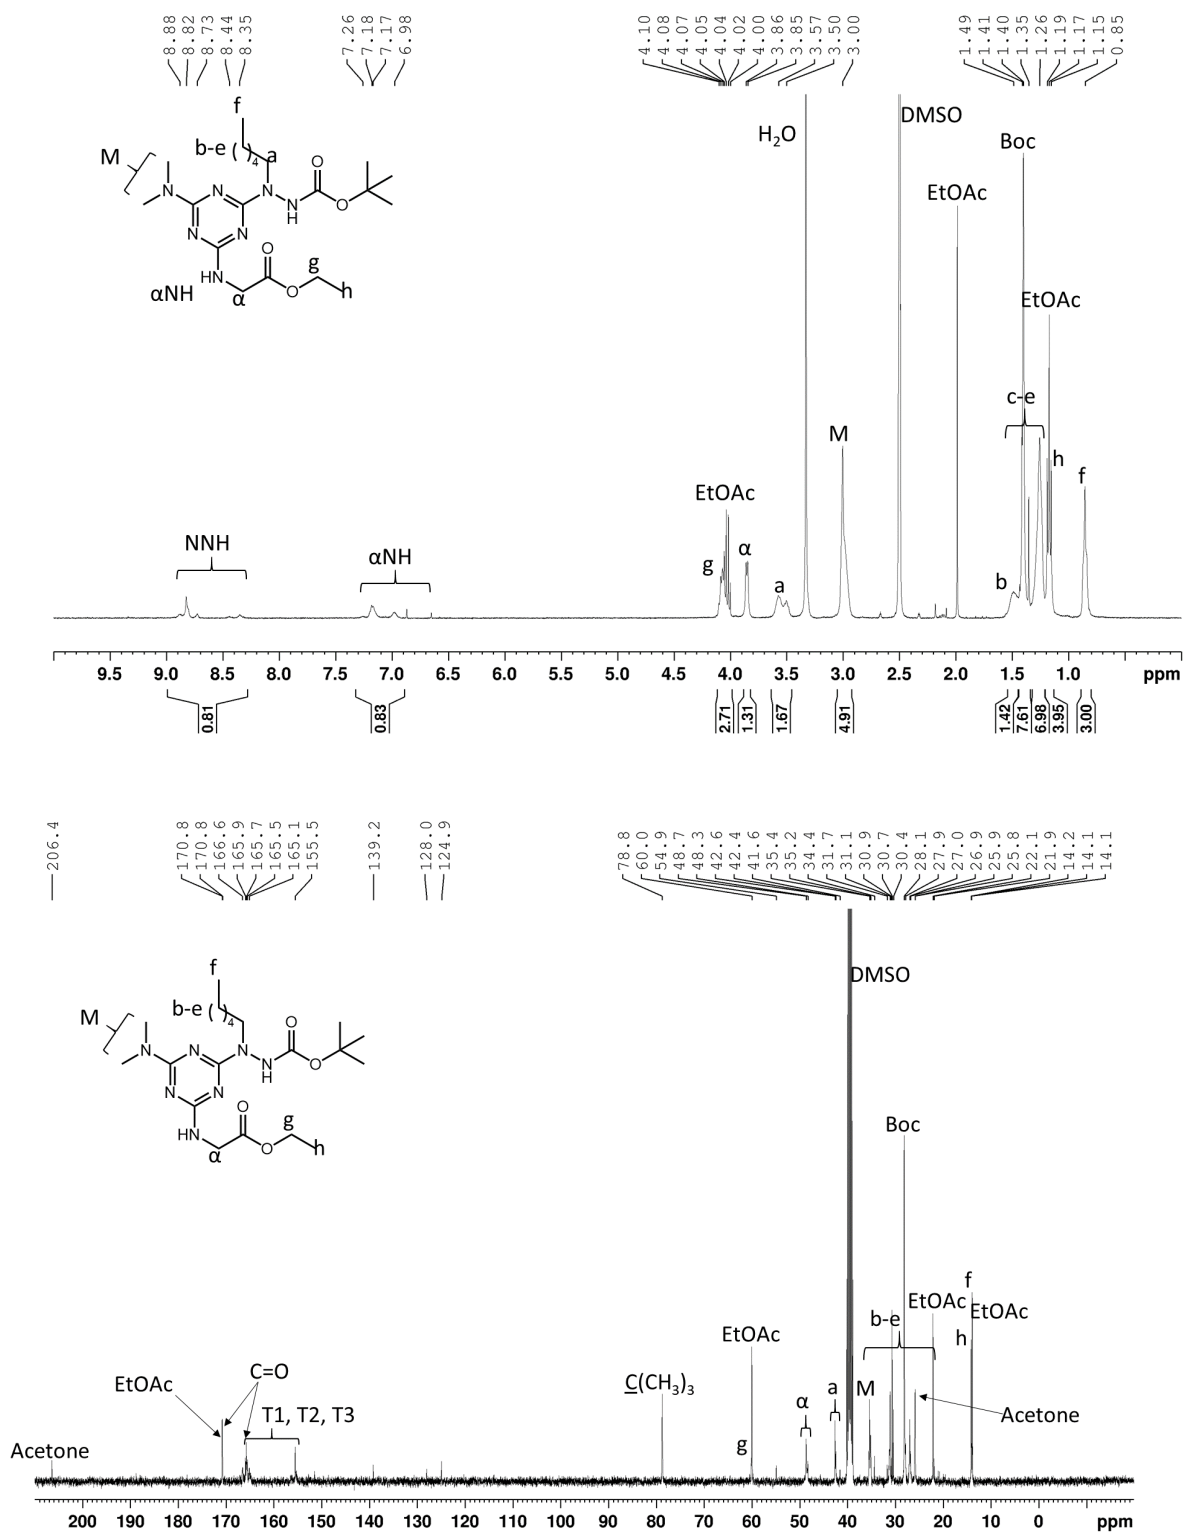

Figure S70. HRMS (ESI) of G<sup>NNMe</sup>-Ester.

| Elmt | Val. | Min | Max | Elmt | Val. | Min | Max | Elmt | Val. | Min | Max | Use Adduct |
|------|------|-----|-----|------|------|-----|-----|------|------|-----|-----|------------|
| H    | 1    | 0   | 300 | O    | 2    | 0   | 4   | S    | 2    | 0   | 0   | H          |
| C    | 4    | 0   | 15  | F    | 1    | 0   | 0   | Cu   | 2    | 0   | 0   |            |
| N    | 3    | 0   | 7   | Si   | 4    | 0   | 0   |      |      |     |     |            |
|      |      |     |     |      |      |     |     |      |      |     |     |            |

Error Margin (ppm): 10  
 HC Ratio: unlimited  
 Max Isotopes: all  
 MSn Iso RI (%): 75.00

DBE Range: -2.0 - 1000.0  
 Apply N Rule: yes  
 Isotope RI (%): 1.00  
 MSn Logic Mode: AND

Electron Ions: both  
 Use MSn Info: no  
 Isotope Res: 10000  
 Max Results: 500

Event#: 1 MS(E+) Ret. Time : 0.587 Scan#: 89

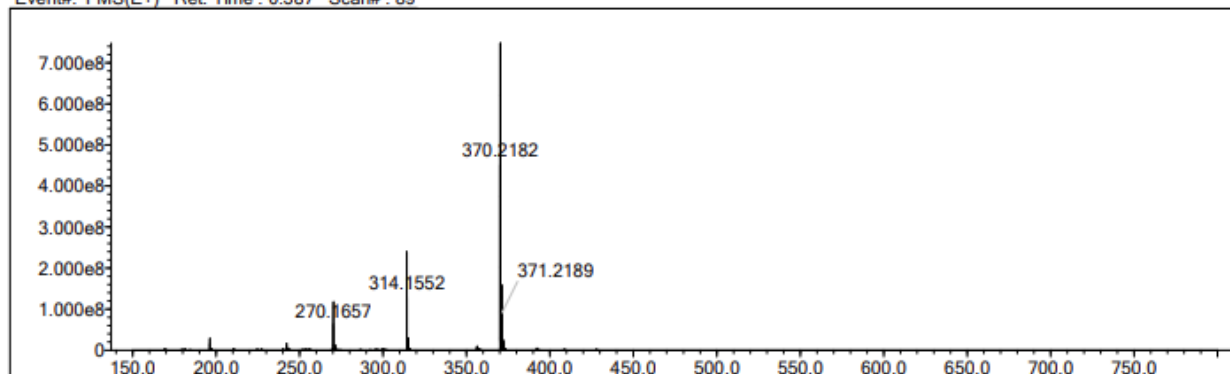

Measured region for 370.2182 m/z

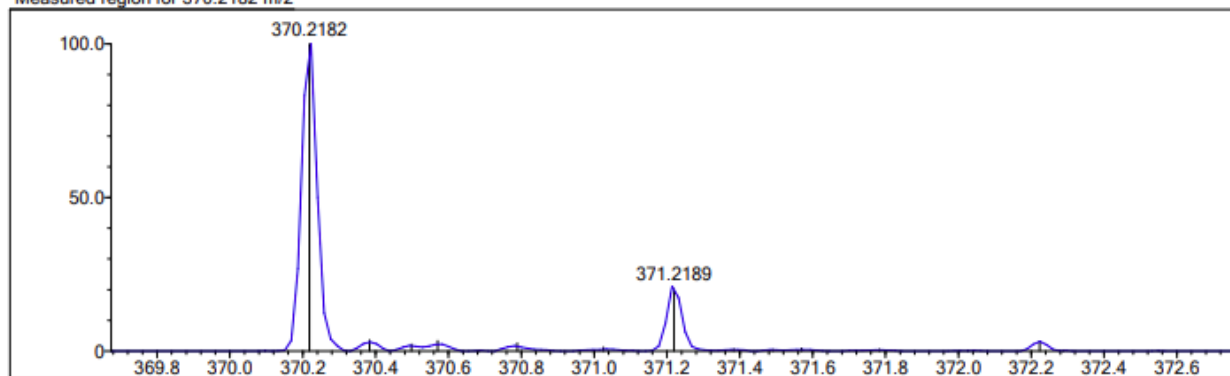

C15 H27 N7 O4 [M+H]<sup>+</sup>: Predicted region for 370.2197 m/z

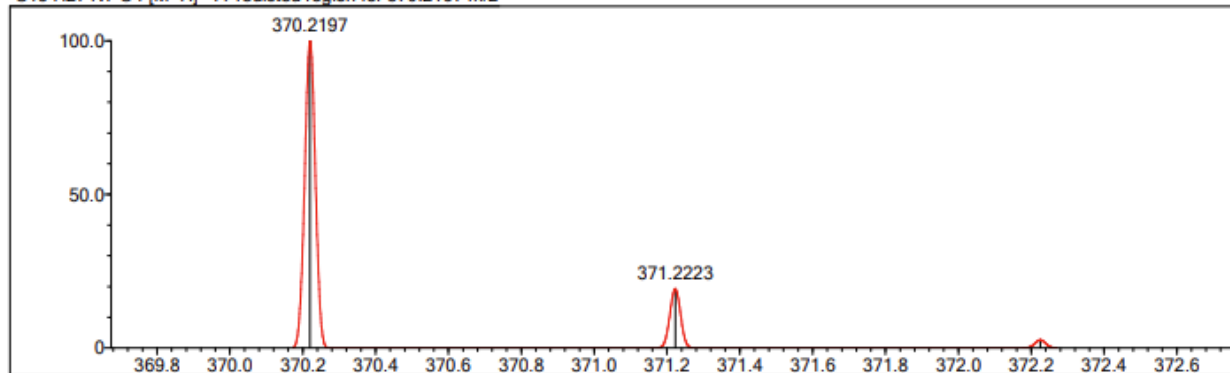

| Rank | Score | Formula (M)   | Ion                | Meas. m/z | Pred. m/z | Df. (mDa) | Df. (ppm) | Iso   | DBE |
|------|-------|---------------|--------------------|-----------|-----------|-----------|-----------|-------|-----|
| 1    | 89.86 | C15 H27 N7 O4 | [M+H] <sup>+</sup> | 370.2182  | 370.2197  | -1.5      | -4.05     | 97.28 | 6.0 |

Figure S71. HRMS (ESI) of G<sup>NNEt</sup>-Ester.

| Elmt | Val. | Min | Max | Elmt | Val. | Min | Max | Elmt | Val. | Min | Max | Use Adduct |
|------|------|-----|-----|------|------|-----|-----|------|------|-----|-----|------------|
| H    | 1    | 0   | 300 | O    | 2    | 0   | 4   | S    | 2    | 0   | 0   | H          |
| C    | 4    | 0   | 16  | F    | 1    | 0   | 0   | Cu   | 2    | 0   | 0   |            |
| N    | 3    | 0   | 7   | Si   | 4    | 0   | 0   |      |      |     |     |            |

Error Margin (ppm): 10  
 HC Ratio: unlimited  
 Max Isotopes: all  
 MSn Iso RI (%): 75.00

DBE Range: -2.0 - 1000.0  
 Apply N Rule: yes  
 Isotope RI (%): 1.00  
 MSn Logic Mode: AND

Electron Ions: both  
 Use MSn Info: no  
 Isotope Res: 10000  
 Max Results: 500

Event#: 1 MS(E+) Ret. Time : 0.420 Scan#: 64

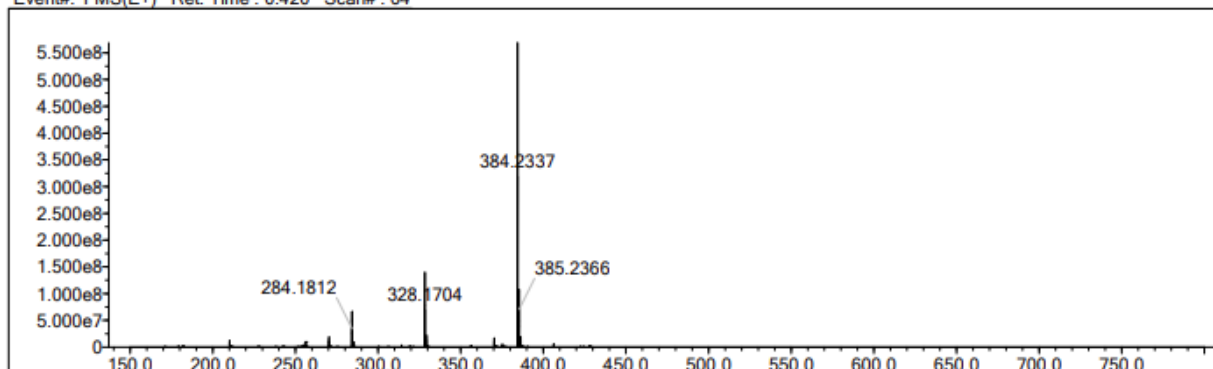

Measured region for 384.2337 m/z

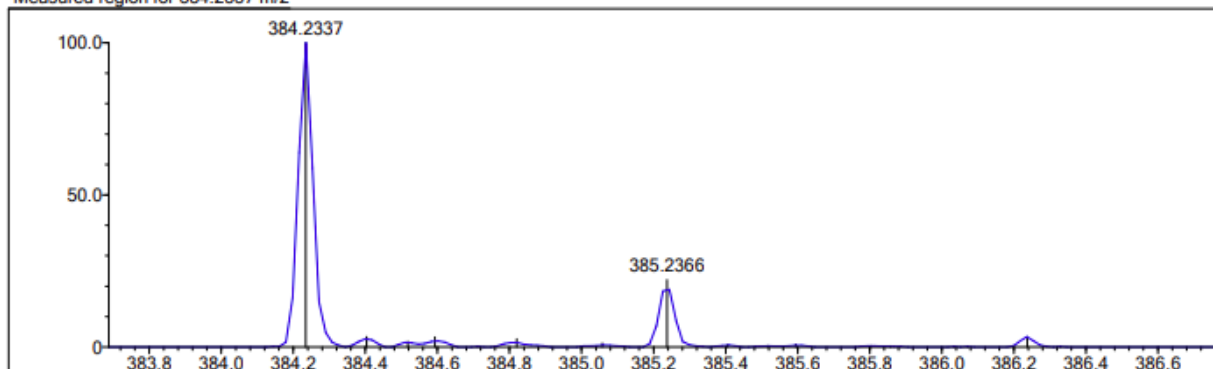

C16 H29 N7 O4 [M+H]<sup>+</sup> : Predicted region for 384.2354 m/z

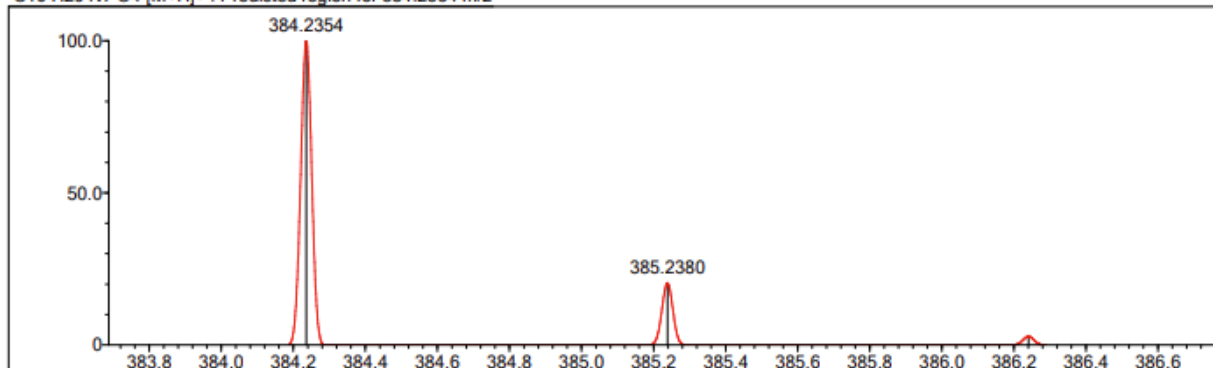

| Rank | Score | Formula (M)   | Ion                | Meas. m/z | Pred. m/z | Df. (mDa) | Df. (ppm) | Iso   | DBE |
|------|-------|---------------|--------------------|-----------|-----------|-----------|-----------|-------|-----|
| 1    | 85.68 | C16 H29 N7 O4 | [M+H] <sup>+</sup> | 384.2337  | 384.2354  | -1.7      | -4.42     | 93.69 | 6.0 |

Figure S72. HRMS (ESI) of G<sup>NNiPr</sup>-Ester.

| Elmt | Val. | Min | Max | Elmt | Val. | Min | Max | Elmt | Val. | Min | Max | Use Adduct |
|------|------|-----|-----|------|------|-----|-----|------|------|-----|-----|------------|
| H    | 1    | 0   | 300 | O    | 2    | 0   | 4   | S    | 2    | 0   | 0   | H          |
| C    | 4    | 0   | 24  | F    | 1    | 0   | 0   | Cu   | 2    | 0   | 0   |            |
| N    | 3    | 0   | 16  | Si   | 4    | 0   | 0   |      |      |     |     |            |

Error Margin (ppm): 10  
 HC Ratio: unlimited  
 Max Isotopes: all  
 MSn Iso RI (%): 75.00

DBE Range: -2.0 - 1000.0  
 Apply N Rule: yes  
 Isotope RI (%): 1.00  
 MSn Logic Mode: AND

Electron Ions: both  
 Use MSn Info: no  
 Isotope Res: 10000  
 Max Results: 500

Event#: 1 MS(E+) Ret. Time : 0.207 Scan#: 32

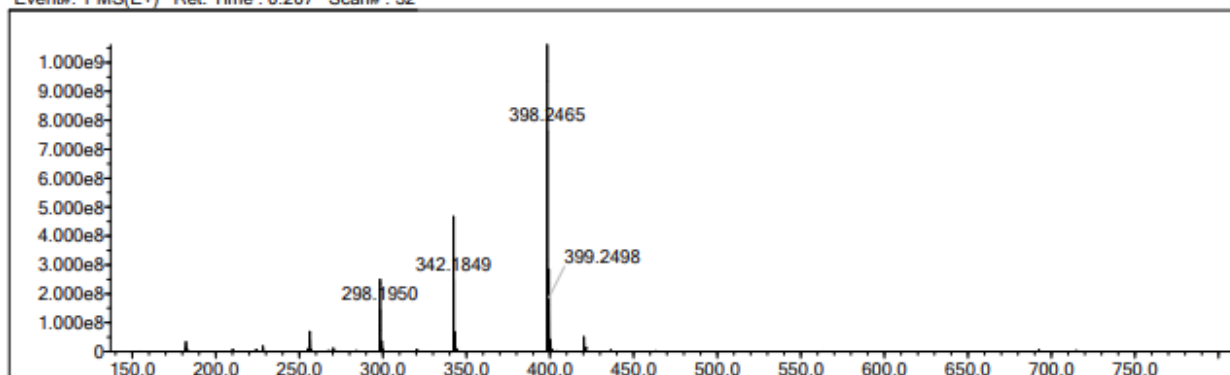

Measured region for 398.2465 m/z

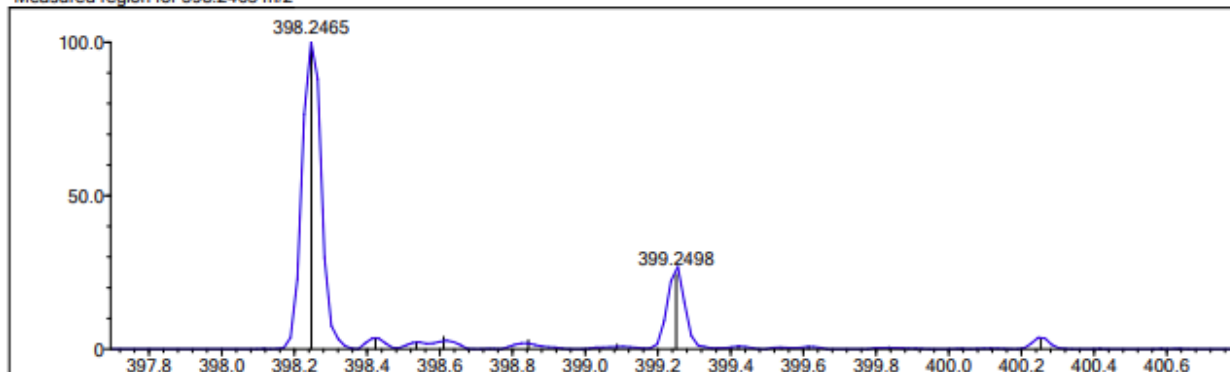

C13 H27 N13 O2 [M+H]<sup>+</sup> : Predicted region for 398.2483 m/z

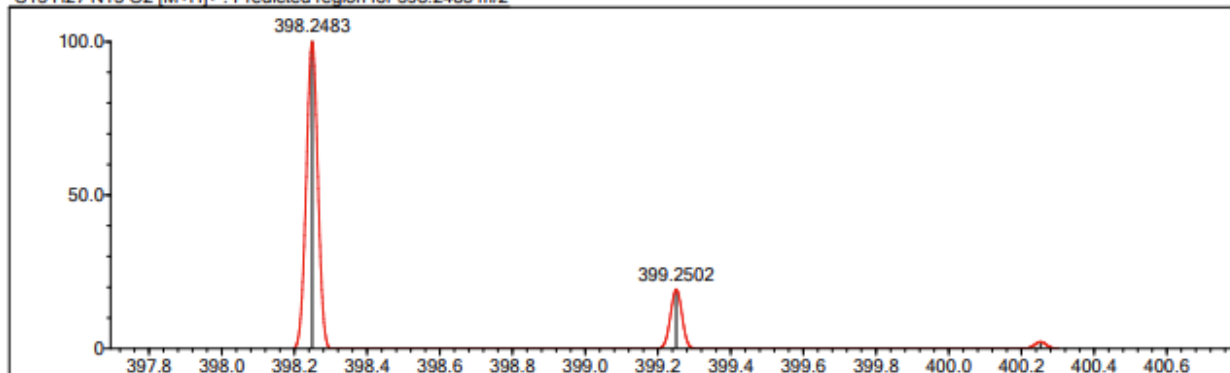

| Rank | Score | Formula (M)    | Ion                | Meas. m/z | Pred. m/z | Df. (mDa) | Df. (ppm) | Isotope | DBE |
|------|-------|----------------|--------------------|-----------|-----------|-----------|-----------|---------|-----|
| 1    | 78.13 | C13 H27 N13 O2 | [M+H] <sup>+</sup> | 398.2465  | 398.2483  | -1.8      | -4.52     | 85.66   | 7.0 |

Figure S73. HRMS (ESI) of G<sup>NNBn</sup>-Ester.

| Elmt | Val. | Min | Max | Elmt | Val. | Min | Max | Elmt | Val. | Min | Max | Use Adduct |
|------|------|-----|-----|------|------|-----|-----|------|------|-----|-----|------------|
| H    | 1    | 0   | 300 | O    | 2    | 0   | 4   | S    | 2    | 0   | 0   | H          |
| C    | 4    | 0   | 21  | F    | 1    | 0   | 0   | Cu   | 2    | 0   | 0   |            |
| N    | 3    | 0   | 7   | Si   | 4    | 0   | 0   |      |      |     |     |            |

Error Margin (ppm): 10  
 DBE Range: -2.0 - 1000.0  
 Electron Ions: both  
 HC Ratio: unlimited  
 Apply N Rule: yes  
 Use MSn Info: no  
 Max Isotopes: all  
 Isotope RI (%): 1.00  
 MSn Iso RI (%): 75.00  
 MSn Logic Mode: AND  
 Isotope Res: 10000  
 Max Results: 500

Event#: 1 MS(E+) Ret. Time : 0.193 Scan#: 30

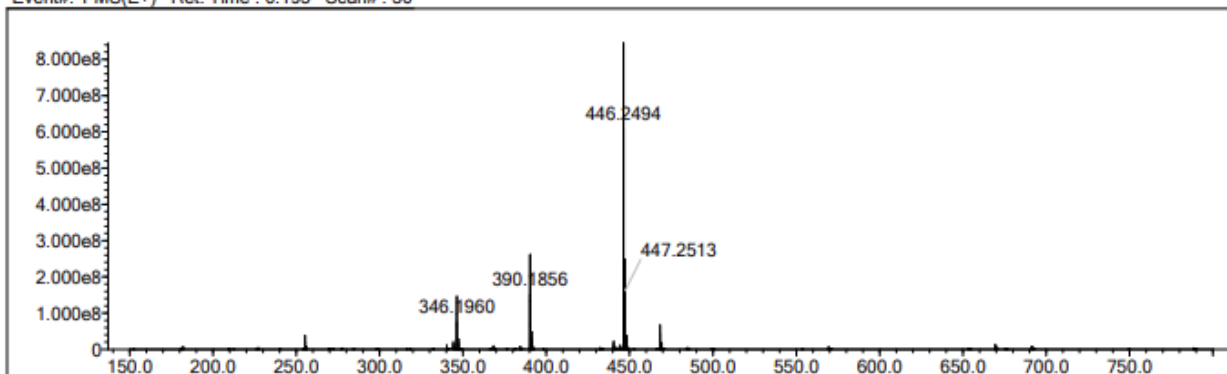

Measured region for 446.2494 m/z

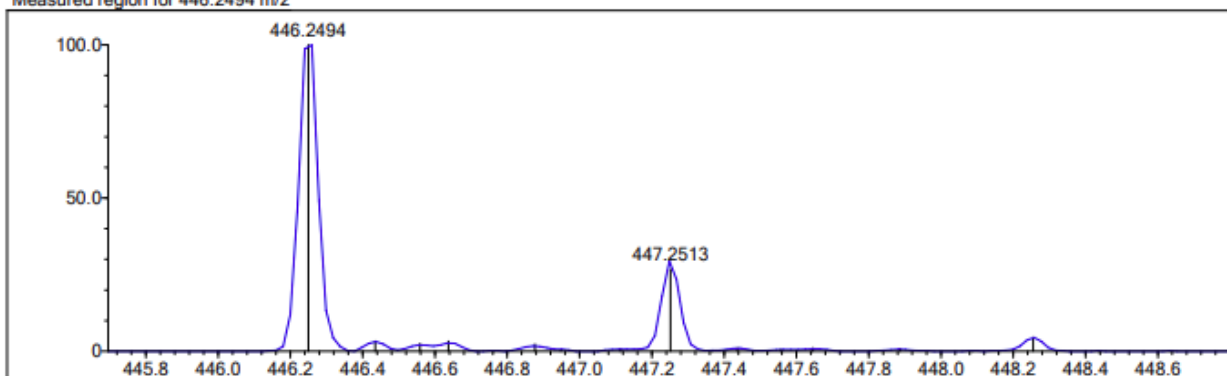

C21 H31 N7 O4 [M+H]<sup>+</sup> : Predicted region for 446.2510 m/z

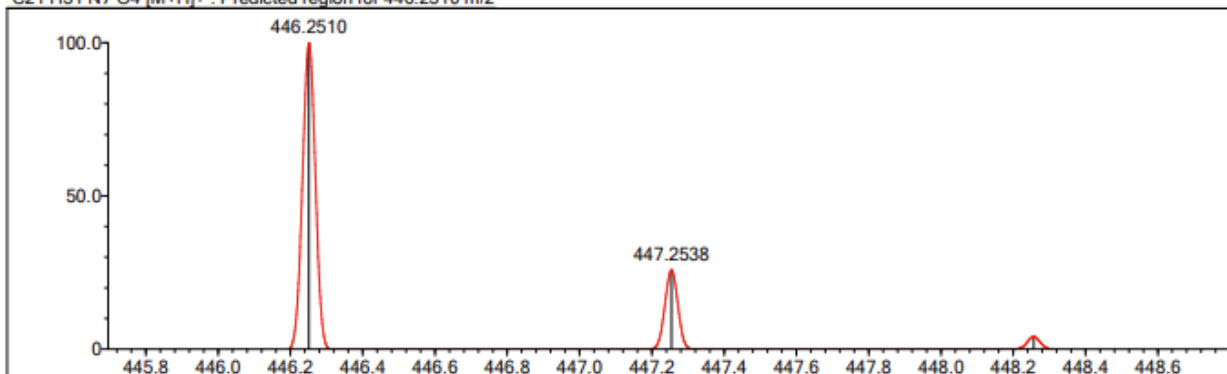

| Rank | Score | Formula (M)   | Ion                | Mees. m/z | Pred. m/z | Df. (mDa) | Df. (ppm) | Iso   | DBE  |
|------|-------|---------------|--------------------|-----------|-----------|-----------|-----------|-------|------|
| 1    | 88.48 | C21 H31 N7 O4 | [M+H] <sup>+</sup> | 446.2494  | 446.2510  | -1.6      | -3.59     | 94.61 | 10.0 |

Figure S74. HRMS (ESI) of G<sup>NNHx</sup>-Ester.

| Elmt | Val. | Min | Max | Elmt | Val. | Min | Max | Elmt | Val. | Min | Max | Use Adduct |
|------|------|-----|-----|------|------|-----|-----|------|------|-----|-----|------------|
| H    | 1    | 0   | 300 | O    | 2    | 0   | 4   | S    | 2    | 0   | 0   | H          |
| C    | 4    | 0   | 20  | F    | 1    | 0   | 0   | Cu   | 2    | 0   | 0   |            |
| N    | 3    | 0   | 7   | Si   | 4    | 0   | 0   |      |      |     |     |            |

Error Margin (ppm): 10  
 HC Ratio: unlimited  
 Max Isotopes: all  
 MSn Iso RI (%): 75.00

DBE Range: -2.0 - 1000.0  
 Apply N Rule: yes  
 Isotope RI (%): 1.00  
 MSn Logic Mode: AND

Electron Ions: both  
 Use MSn Info: no  
 Isotope Res: 10000  
 Max Results: 500

Event#: 1 MS(E+) Ret. Time : 0.453 Scan#: 69

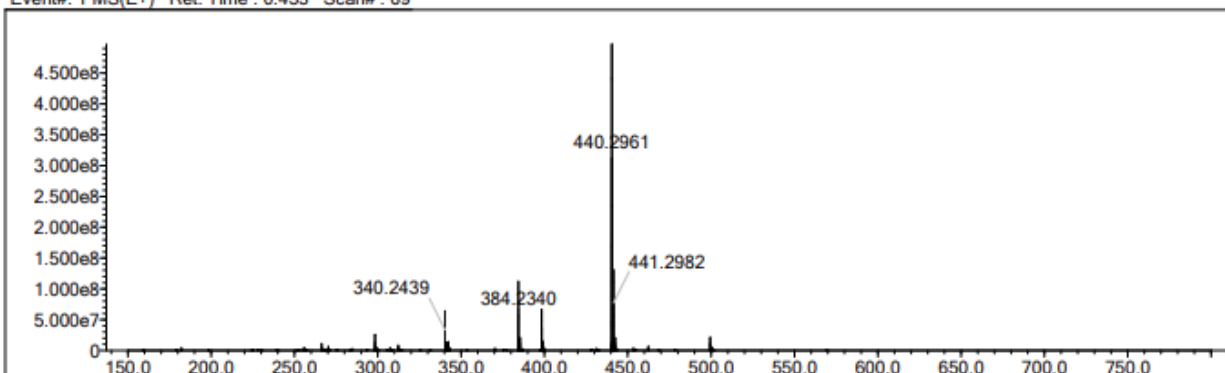

Measured region for 440.2961 m/z

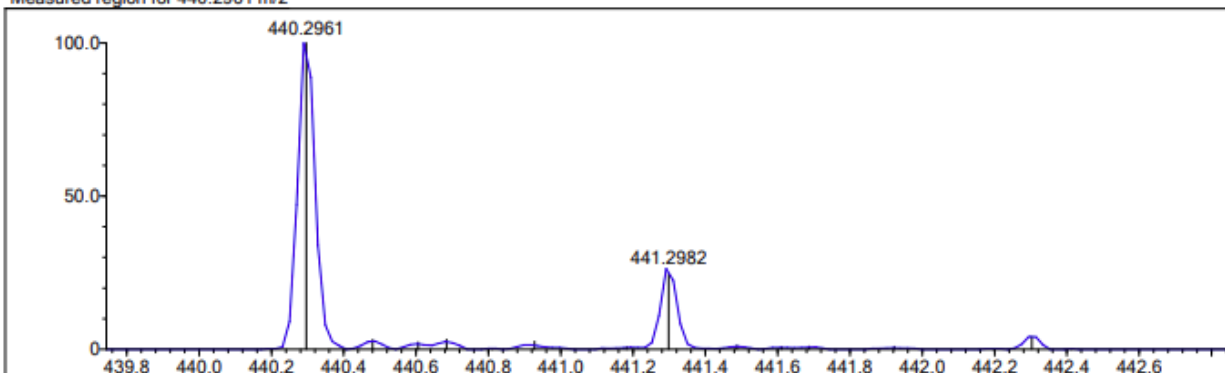

C20 H37 N7 O4 [M+H]<sup>+</sup> : Predicted region for 440.2980 m/z

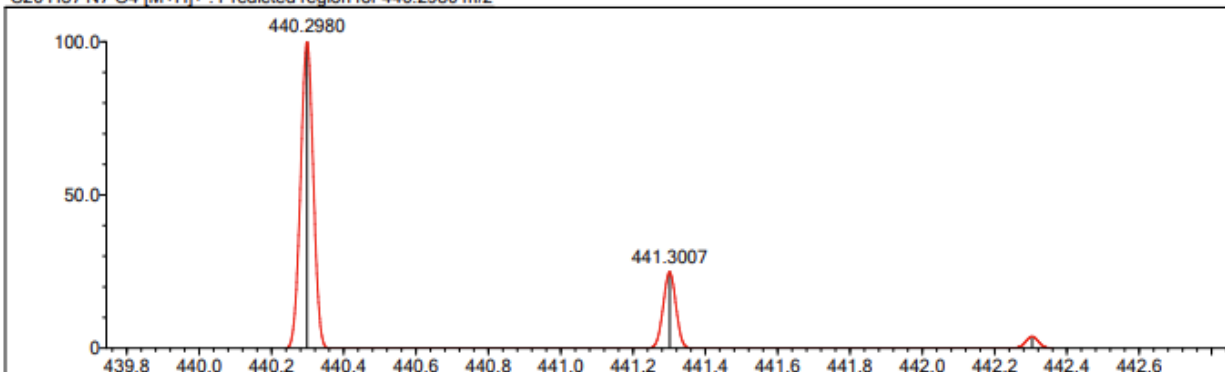

| Rank | Score | Formula (M)   | ion                | Meas. m/z | Pred. m/z | Df. (mDa) | Df. (ppm) | Iso   | DBE |
|------|-------|---------------|--------------------|-----------|-----------|-----------|-----------|-------|-----|
| 1    | 86.51 | C20 H37 N7 O4 | [M+H] <sup>+</sup> | 440.2961  | 440.2980  | -1.9      | -4.32     | 94.34 | 6.0 |



## SYNTHESIS OF MONOMERS

General synthesis of amide products deriving from the synthesis of **G<sup>NNHx</sup>-Monomer**. The ester products were amidated with an amino acetal with a mild acidic catalyst and heat as illustrated and described below.

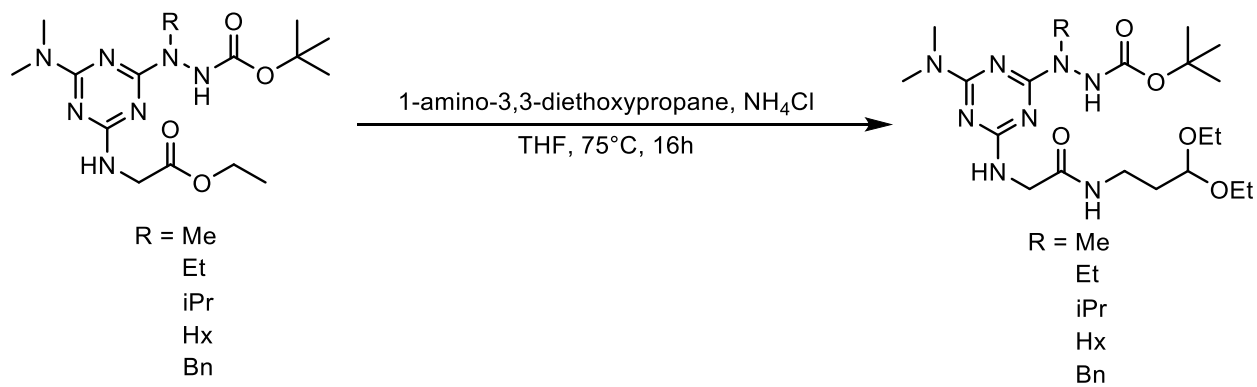

**G<sup>NNHx</sup>-Ester** (0.1178 g, 0.27 mmol, 1 eq) was charged to a round-bottom flask along with 1-amino-3,3-diethoxypropane (0.6689 g, 4.5 mmol, 17 eq) and THF (1mL, 0.25 M). Ammonium chloride (0.1789 g, 3.3 mmol, 12.5 eq) was triturated and added to the round-bottom flask. The reaction was then heated to 65°C and a reflux condenser was attached to the round-bottom flask. Extra ammonium chloride (0.1658 g, 3.1 mmol, 11.6 eq) was added to the reaction after two hours of stirring. The reaction was stopped after 19 hours of stirring and was extracted thrice with 50 mL of water and 50 mL of ethyl acetate. The organic layer was collected and dried with magnesium sulfate followed by filtration. The resulting organic layer was concentrated with rotary evaporation. The crude **G<sup>NNHx</sup>-Monomer** was purified by column chromatography with 75 mL SiO<sub>2</sub> and 3% to 5% methanol in DCM, affording pure **G<sup>NNHx</sup>-Monomer** (0.036 g, 0.067 mmol, 25% yield). Unreacted **G<sup>NNHx</sup>-Ester** (0.061 g, 0.18 mmol) was recovered, giving an adjusted yield of 67%.

HRMS (ESI) m/z: [M + H]<sup>+</sup> Calculated for C<sub>25</sub>H<sub>48</sub>N<sub>8</sub>O<sub>5</sub> 541.3823; Found 541.3820

<sup>1</sup>H NMR (DMSO, 400 MHz): δ 8.87 – 8.30 (s, 1 H), 7.81 – 7.13 (m, 1 H), 6.94 – 6.59 (m, 1 H), 4.45 (m, 1 H), 3.89 – 3.67 (m, 2 H), 3.64 – 3.47 (m, 4 H), 3.44 – 3.36 (m, 2 H), 3.08 (q, J = 6.4 Hz, 2 H), 3.00 (s, 6 H), 1.63 (q, J = 6.4 Hz, 2 H), 1.54 – 1.20 (m, 17 H), 1.08 (t, J = 7.0 Hz, 6 H), 0.85 (m, 3 H).

<sup>13</sup>C{<sup>1</sup>H} NMR (DMSO, 100 MHz): δ 169.7, 166.4, 165.5, 162.4, 155.5, 100.7, 78.8, 60.7, 54.9, 48.6, 44.1, 35.4, 34.7, 33.4, 31.2, 28.2, 27.1, 26.8, 25.9, 22.1, 15.3, 14.0

**G<sup>NNMe</sup>-Monomer**: **G<sup>NNMe</sup>-Ester** (0.157 g, 0.43 mmol, 1 eq) was charged to a round-bottom flask along with 0.5 mL THF, 1-amino-3,3-diethoxypropane (0.6478 g, 4.4 mmol, 10.3 eq), and ammonium chloride (0.0634 g, 1.2 mmol, 2.8 eq). The reaction was heated to 70°C and allowed to stir for 16 hours, after which the reaction was finished. The reaction was then concentrated *via* rotary evaporation and the crude reaction was extracted with 50 mL ethyl acetate and 100 mL of water, followed by 30 mL of brine. The organic layer was collected and dried with magnesium sulfate and filtered. The filtrate was collected and ethyl acetate was removed *via* rotary evaporation, affording crude **G<sup>NNMe</sup>-Monomer**. Pure **G<sup>NNMe</sup>-**

**Monomer** (0.158 g, 0.34 mmol, 79% yield) was obtained after column chromatography with 75 mL of SiO<sub>2</sub> and 3% methanol in chloroform.

HRMS (ESI) m/z: [M + H]<sup>+</sup> Calculated for C<sub>20</sub>H<sub>38</sub>N<sub>8</sub>O<sub>5</sub> 471.3038; Found 471.3030

<sup>1</sup>H NMR (DMSO, 400 MHz): δ 8.91 (s, 1 H), 7.75 – 7.54 (m, 1 H), 6.99 – 6.70 (m, 1 H), 4.45 (m, 1 H), 3.88 – 3.69 (m, 2 H), 3.53 (m, 2 H), 3.39 (m, 2 H), 3.14 (s, 3 H), 3.08 (m, 2 H), 3.00 (s, 6 H), 1.63 (m, 2 H), 1.43 – 1.21 (s, 9 H), 1.09 (t, *J* = 7.0 Hz, 6 H).

<sup>13</sup>C{<sup>1</sup>H} NMR (DMSO, 100 MHz): δ 169.6, 165.81, 165.76, 165.3, 155.4, 100.6, 78.9, 60.7, 44.0, 37.3, 35.3, 34.7, 33.3, 28.2, 15.3.

**G<sup>NNEt</sup>-Monomer: G<sup>NNEt</sup>-Ester** (0.107 g, 0.28 mmol, 1 eq) was charged to a round-bottom flask along with 1-amino-3,3-diethoxypropane (0.2114 g, 1.4 mmol, 5 eq) and THF (0.25 mL) and DMF (0.25 mL, 0.6 mL). Ammonium chloride (0.1017 g, 1.9 mmol, 7 eq) was triturated and added to the round-bottom flask. The reaction was then heated to 75°C and a reflux condenser was attached to the round-bottom flask. The reaction was stopped after 19 hours of stirring and concentrated *via* rotary evaporation. The reaction was then extracted thrice with 25 mL ethyl acetate and 25 mL water. The organic layer was then concentrated *via* rotary evaporation. The reaction was then resuspended in 1-amino-3,3-diethoxypropane (1.2437 g, 8.4 mmol, 30 eq) and THF (15 drops, ~0.2 mL). Ammonium chloride (0.0475 g, 0.9 mmol, 3 eq) was triturated and added to the round-bottom flask. The reaction was then heated to 75°C and lightly capped. The reaction was stopped after an additional 4 hours of stirring and concentrated *via* rotary evaporation. The reaction was then extracted thrice with 50 mL water and 50 mL ethyl acetate. The organic layer was dried with magnesium sulfate and filtered. Following concentration *via* rotary evaporation, the crude reaction was purified with column chromatography with 60 mL SiO<sub>2</sub> and 4% methanol in chloroform, yielding pure **G<sup>NNEt</sup>-Monomer** (0.114 g, 0.23 mmol, 84% yield).

HRMS (ESI) m/z: [M + H]<sup>+</sup> Calculated for C<sub>21</sub>H<sub>40</sub>N<sub>8</sub>O<sub>5</sub> 485.3194; Found 485.3188

<sup>1</sup>H NMR (DMSO, 400 MHz): δ 8.88 – 8.34 (s, 1 H), 7.99 – 7.54 (m, 1 H), 6.96 – 6.64 (m, 1 H), 4.45 (m, 1 H), 3.87 – 3.68 (m, 2 H), 3.67 – 3.58 (m, 2 H), 3.56 – 3.48 (m, 2 H), 3.45 – 3.36 (m, 2 H), 3.08 (q, *J* = 6.5 Hz, 2 H), 3.00 (s, 6 H), 1.67 – 1.59 (m, 2 H), 1.44 – 1.22 (s, 9 H), 1.14 – 1.00 (m, 9 H).

<sup>13</sup>C{<sup>1</sup>H} NMR (DMSO, 100 MHz): δ 169.7, 166.2, 165.8, 161.1, 155.6, 100.6, 78.8, 60.8, 44.0, 35.4, 35.3, 34.7, 33.3, 28.2, 15.3, 12.5.

**G<sup>NNiPr</sup>-Monomer: G<sup>NNiPr</sup>-Ester** (0.279 g, 0.70 mmol, 1 eq) was charged to a round bottom flask along with 1-amino-3,3-diethoxypropane (1.5622 g, 10.6 mmol, 15.1 eq) and previously triturated ammonium chloride (0.1139 g, 2.1 mmol, 3 eq) and THF (1 mL). A small stir bar was added to the flask and the reaction was heated to 70°C and lightly capped. The reaction was left to go overnight (18 hours). The reaction was then concentrated *via* rotary evaporation and the crude reaction was extracted thrice with 50 mL of water and 50 mL of ethyl acetate. The organic layer was collected and dried with magnesium sulfate and filtered. Crude **G<sup>NNiPr</sup>-Monomer** was isolated by removing the ethyl acetate *via* rotary evaporation. Pure **G<sup>NNiPr</sup>-**

**Monomer** (0.319 g, 0.64 mmol, 91% yield) was obtained with column chromatography using 75 mL of SiO<sub>2</sub> and 3% methanol in chloroform.

HRMS (ESI) m/z: [M + H]<sup>+</sup> Calculated for C<sub>22</sub>H<sub>42</sub>N<sub>8</sub>O<sub>5</sub> 499.3351; Found 499.3342

<sup>1</sup>H NMR (DMSO, 400 MHz): δ 8.54 – 8.01 (s, 1 H), 7.75 – 7.51 (m, 1 H), 6.95 – 6.45 (m, 1 H), 4.82 (m, 1 H), 4.46 (m, 1 H), 4.07 – 3.64 (m, 2 H), 3.53 (m, 2 H), 3.39 (m, 2 H), 3.07 (m, 2 H), 3.00 (s, 6 H), 1.63 (m, 2 H), 1.43 – 1.23 (m, 9 H), 1.12 – 0.96 (m, 12 H).

<sup>13</sup>C{<sup>1</sup>H} NMR (DMSO, 100 MHz): δ 169.7, 165.8, 165.5, 165.3, 156.2, 100.6, 78.6, 60.7, 46.8, 44.0, 35.4, 34.7, 33.3, 28.1, 19.5, 15.3.

**G<sup>NNBn</sup>-Monomer: G<sup>NNBn</sup>-Ester** (91.0 mg, 0.20 mmol, 1 eq) was charged to a round-bottom flask along with 1-amino-3,3-diethoxypropane (0.3307 g, 2.25 mmol, 11 eq), previously triturated ammonium chloride (33.1 mg, 0.62 mmol, 3 eq), and 1 mL of THF. The reaction was then heated to 65°C with gentle stirring. After 13 hours, the reaction was extracted thrice with 50 mL of water and 50 mL of ethyl acetate. The organic layer was collected and dried with magnesium sulfate. Ethyl acetate was then removed *via* rotary evaporation, affording crude **G<sup>NNBn</sup>-Monomer**. Column chromatography with 50 mL SiO<sub>2</sub> and 5% methanol in chloroform afforded pure **G<sup>NNBn</sup>-Monomer** (41.8 mg, 76.5 μmol, 37% yield) as a clear oil.

HRMS (ESI) m/z: [M + H]<sup>+</sup> Calculated for C<sub>26</sub>H<sub>42</sub>N<sub>8</sub>O<sub>5</sub> 547.3351; Found 547.3342

<sup>1</sup>H NMR (DMSO, 400 MHz): δ 9.04 – 8.86 (s, 1 H), 7.75 – 7.54 (m, 1 H), 7.37 – 6.89 (m, 6 H), 4.82 (m, 2 H), 4.45 (m, 1 H), 3.92 – 3.67 (m, 2 H), 3.52 (m, 2 H), 3.38 (m, 2 H), 3.09 (m, 2 H), 3.01 (s, 6 H), 1.63 (m, 2 H), 1.43 – 1.16 (s, 9 H), 1.08 (m, 6 H).

<sup>13</sup>C{<sup>1</sup>H} NMR (DMSO, 100 MHz): δ 169.6, 166.8, 166.4, 165.9, 155.5, 138.4, 128.0, 127.4, 126.7, 100.6, 79.2, 60.7, 52.4, 44.1, 35.4, 35.3, 34.7, 33.3, 28.1, 15.3.

## SYNTHESIS OF MACROCYCLES

General synthesis of macrocycles derived from the synthesis of  $G^{NNHx}$ .

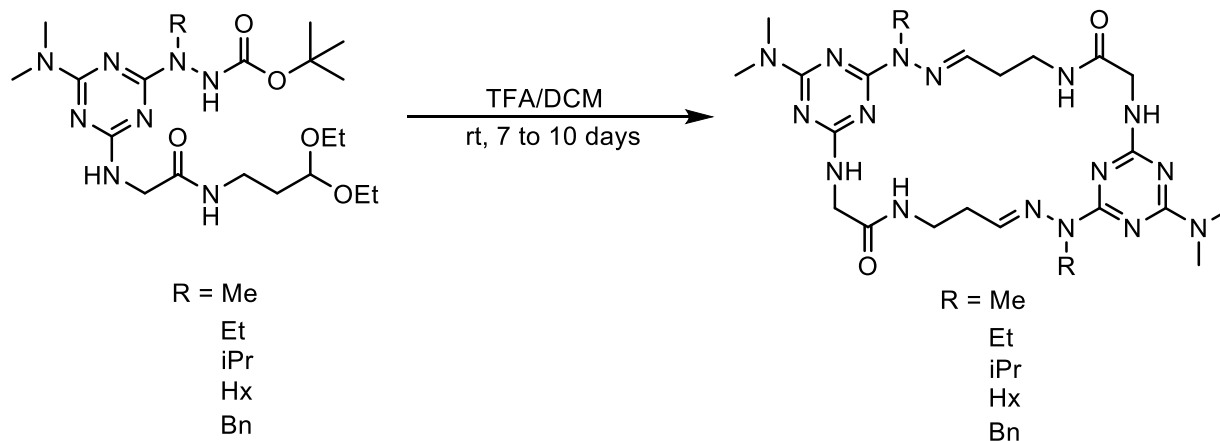

$G^{NNHx}$ -**Monomer** (24 mg, 44  $\mu$ mol) was added to a 5 mL scintillation vial along with a magnetic stir bar. 1 mL of dichloromethane was then added *via* pipette and allowed to stir until completely dissolved. 1 mL of TFA was then added to the vial, with an immediate color change from clear to yellow occurring. The reaction was allowed to evaporate to dryness with stirring over the course of 9 days. Pure  $G^{NNHx}$  was observed with  $^1H$  NMR in MeOD, requiring no work-up or purification.

HRMS (ESI)  $m/z$ :  $[M + H]^+$  Calculated for  $C_{32}H_{56}N_{16}O_2$  697.4845; Found 697.4863

$^1H$  NMR (DMSO, 400 MHz):  $\delta$  11.88 (s, 1 H), 9.27 (m, 1 H), 7.93 (t,  $J = 6.2$  Hz, 1 H), 7.61 (m, 1 H), 4.08 (d,  $J = 5.2$  Hz, 2 H), 3.84 (m, 2 H), 3.74 – 3.39 (m, 1 H), 3.10 (s, 3 H), 3.08 (s, 3 H), 3.04 – 2.90 (m, 1 H), 2.69 (m, 2 H), 1.38 (m, 2 H), 1.33 – 1.06 (m, 6 H), 0.85 (m, 3 H).

$^{13}C\{^1H\}$  NMR (DMSO, 100 MHz):  $\delta$  175.5, 161.1, 154.3, 152.6, 146.1, 44.0, 40.9, 36.7, 36.3, 33.1, 31.8, 30.7, 25.7, 24.7, 22.0, 13.8.

$G^{NNiPr}$ :

HRMS (ESI)  $m/z$ :  $[M + H]^+$  Calculated for  $C_{26}H_{44}N_{16}O_2$  613.3906; Found 613.3907

$^1H$  NMR (DMSO, 400 MHz):  $\delta$  11.64 (s, 1 H), 9.28 (m, 1 H), 8.12 (m, 1 H), 7.81 (m, 1 H), 4.83 (sept,  $J = 7.0$  Hz, 1 H), 4.09 (m, 2 H), 3.66 (m, 2 H), 3.11 (s, 3 H), 3.06 (s, 3 H), 2.68 (m, 2 H), 1.31 (d,  $J = 7.0$  Hz, 6 H).

$^{13}C\{^1H\}$  NMR (DMSO, 100 MHz):  $\delta$  175.9, 169.9, 158.1, 157.8, 152.6, 47.5, 43.8, 36.6, 32.8, 32.3, 18.6.

$G^{NNMe}$ : The cyclization was stopped after 4 hours, showing complete conversion to the macrocycle after rotary evaporation.

HRMS (ESI)  $m/z$ :  $[M + H]^+$  Calculated for  $C_{22}H_{36}N_{16}O_2$  557.3280; Found 557.3274

$^1\text{H}$  NMR (DMSO, 400 MHz):  $\delta$  11.91 (s, 1 H), 9.31 (m, 1 H), 7.91 (m, 1 H), 7.54 (m, 1 H), 4.07 (m, 2 H), 3.61 (m, 2 H), 3.24 (s, 3 H), 3.12 (s, 3 H), 3.09 (s, 3H), 2.69 (m, 2 H).

$^{13}\text{C}\{^1\text{H}\}$  NMR (DMSO, 100 MHz):  $\delta$  171.7, 161.1, 154.3, 152.9, 146.1, 44.1, 36.8, 36.5, 33.2, 31.8, 28.6.

**G<sup>NNEt</sup>**:

HRMS (ESI) m/z:  $[\text{M} + \text{H}]^+$  Calculated for  $\text{C}_{24}\text{H}_{40}\text{N}_{16}\text{O}_2$  585.3593; Found 585.3572

$^1\text{H}$  NMR (DMSO, 400 MHz):  $\delta$  11.87 (s, 1 H), 9.26 (m, 1 H), 7.92 (m, 1 H), 7.61 (m, 1 H), 4.07 (m, 2 H), 3.92 (m, 2 H), 3.51 (m, 2 H), 3.09 (s, 3 H), 3.08 (s, 3 H), 2.69 (m, 2 H), 0.99 (m, 3 H).

$^{13}\text{C}\{^1\text{H}\}$  NMR (DMSO, 100 MHz):  $\delta$  171.5, 161.1, 154.3, 152.3, 145.8, 44.0, 36.6, 36.4, 36.1, 33.2, 31.8, 10.3.

**G<sup>NNBn</sup>**: The cyclization was stopped after 24 hours, showing complete conversion to the macrocycle after rotary evaporation.

HRMS (ESI) m/z:  $[\text{M} + \text{H}]^+$  Calculated for  $\text{C}_{34}\text{H}_{44}\text{N}_{16}\text{O}_2$  709.3906; Found 709.3896

$^1\text{H}$  NMR (DMSO, 400 MHz):  $\delta$  11.99 (s, 1 H), 9.18 (m, 1 H), 7.97 (m, 1 H), 7.55 (m, 1 H), 7.37 – 7.26 (m, 5 H), 5.21 (m, 2 H), 4.12 (m, 2 H), 3.67 (m, 2 H), 3.16 (s, 3 H), 3.15 (s, 3 H), 2.60 (m, 2 H).

$^{13}\text{C}\{^1\text{H}\}$  NMR (DMSO, 100 MHz):  $\delta$  171.8, 161.4, 154.7, 151.6, 146.2, 134.1, 128.8, 127.8, 127.1, 47.8, 44.2, 36.8, 36.7, 33.2, 31.8

Figure S75. The 400 MHz  $^1\text{H}$  and 100 MHz  $^{13}\text{C}$  NMR Spectra of  $\text{G}^{\text{NNMe}}$ -Monomer in DMSO.

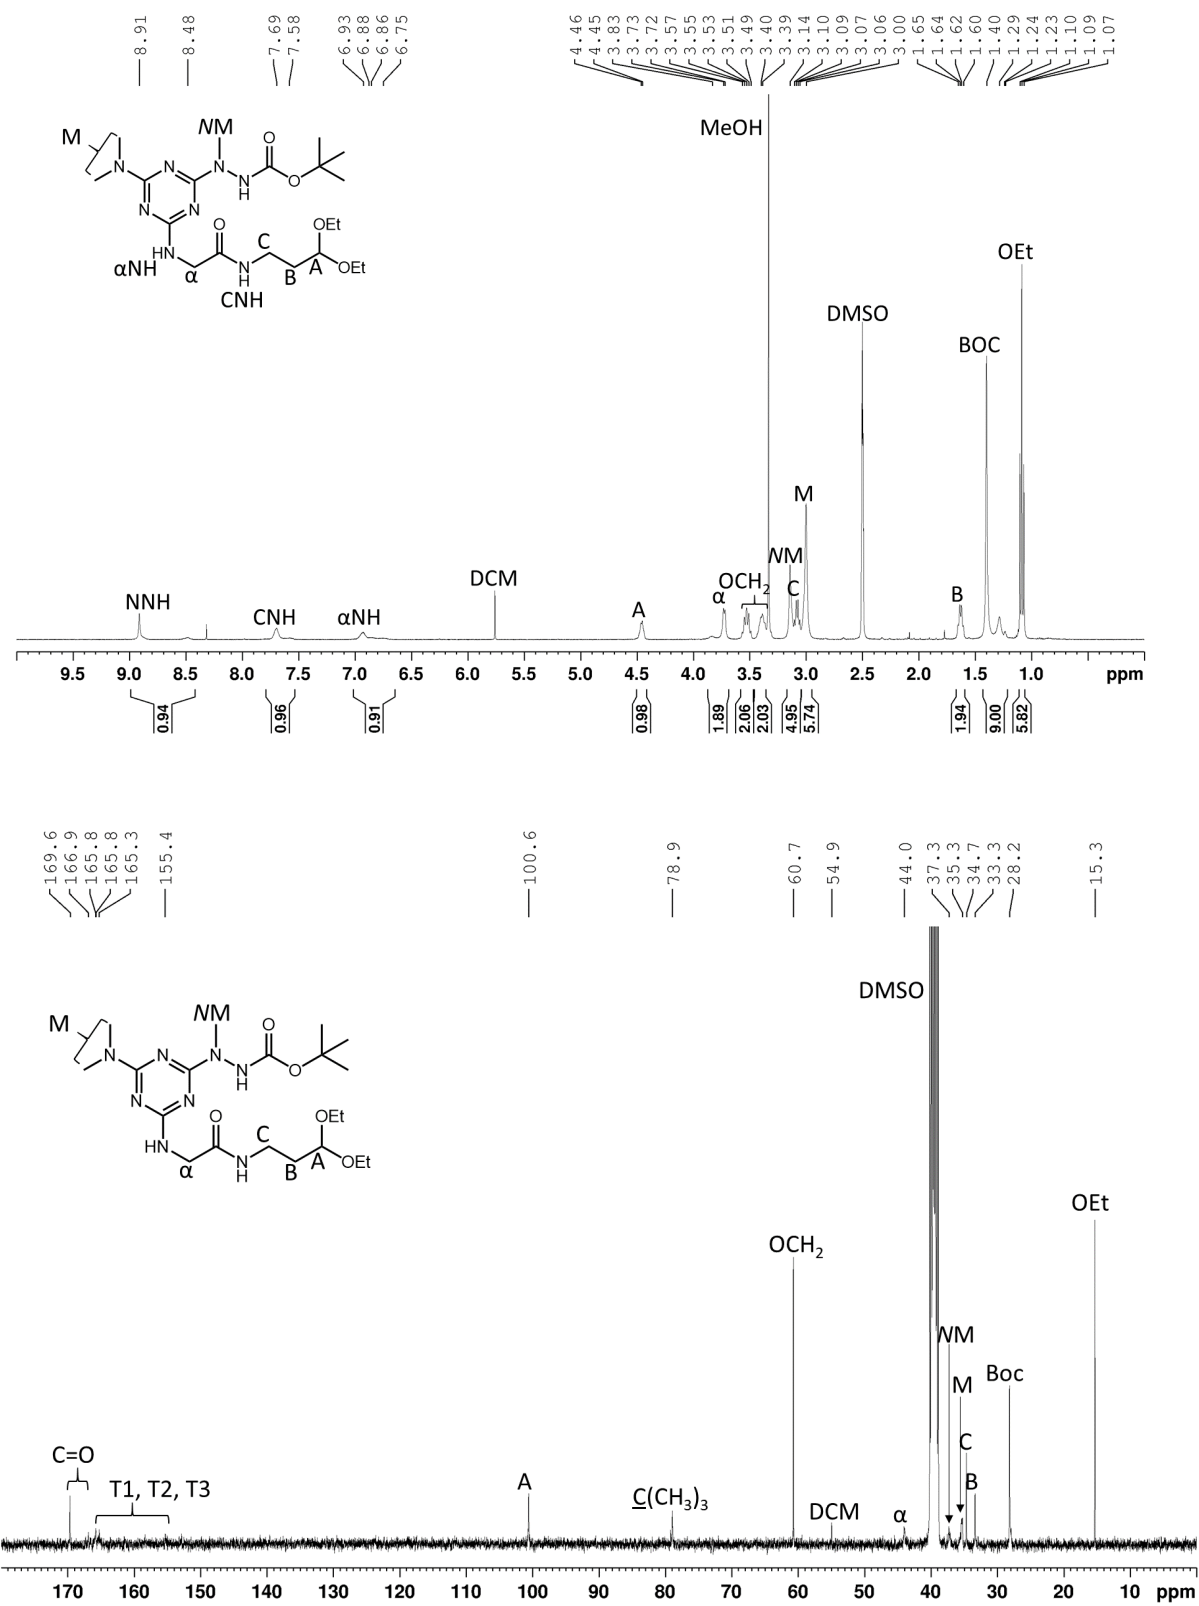

Figure S76. The 400 MHz  $^1\text{H}$  and 100 MHz  $^{13}\text{C}$  NMR Spectra of  $\text{G}^{\text{NNEt}}$ -Monomer in DMSO.

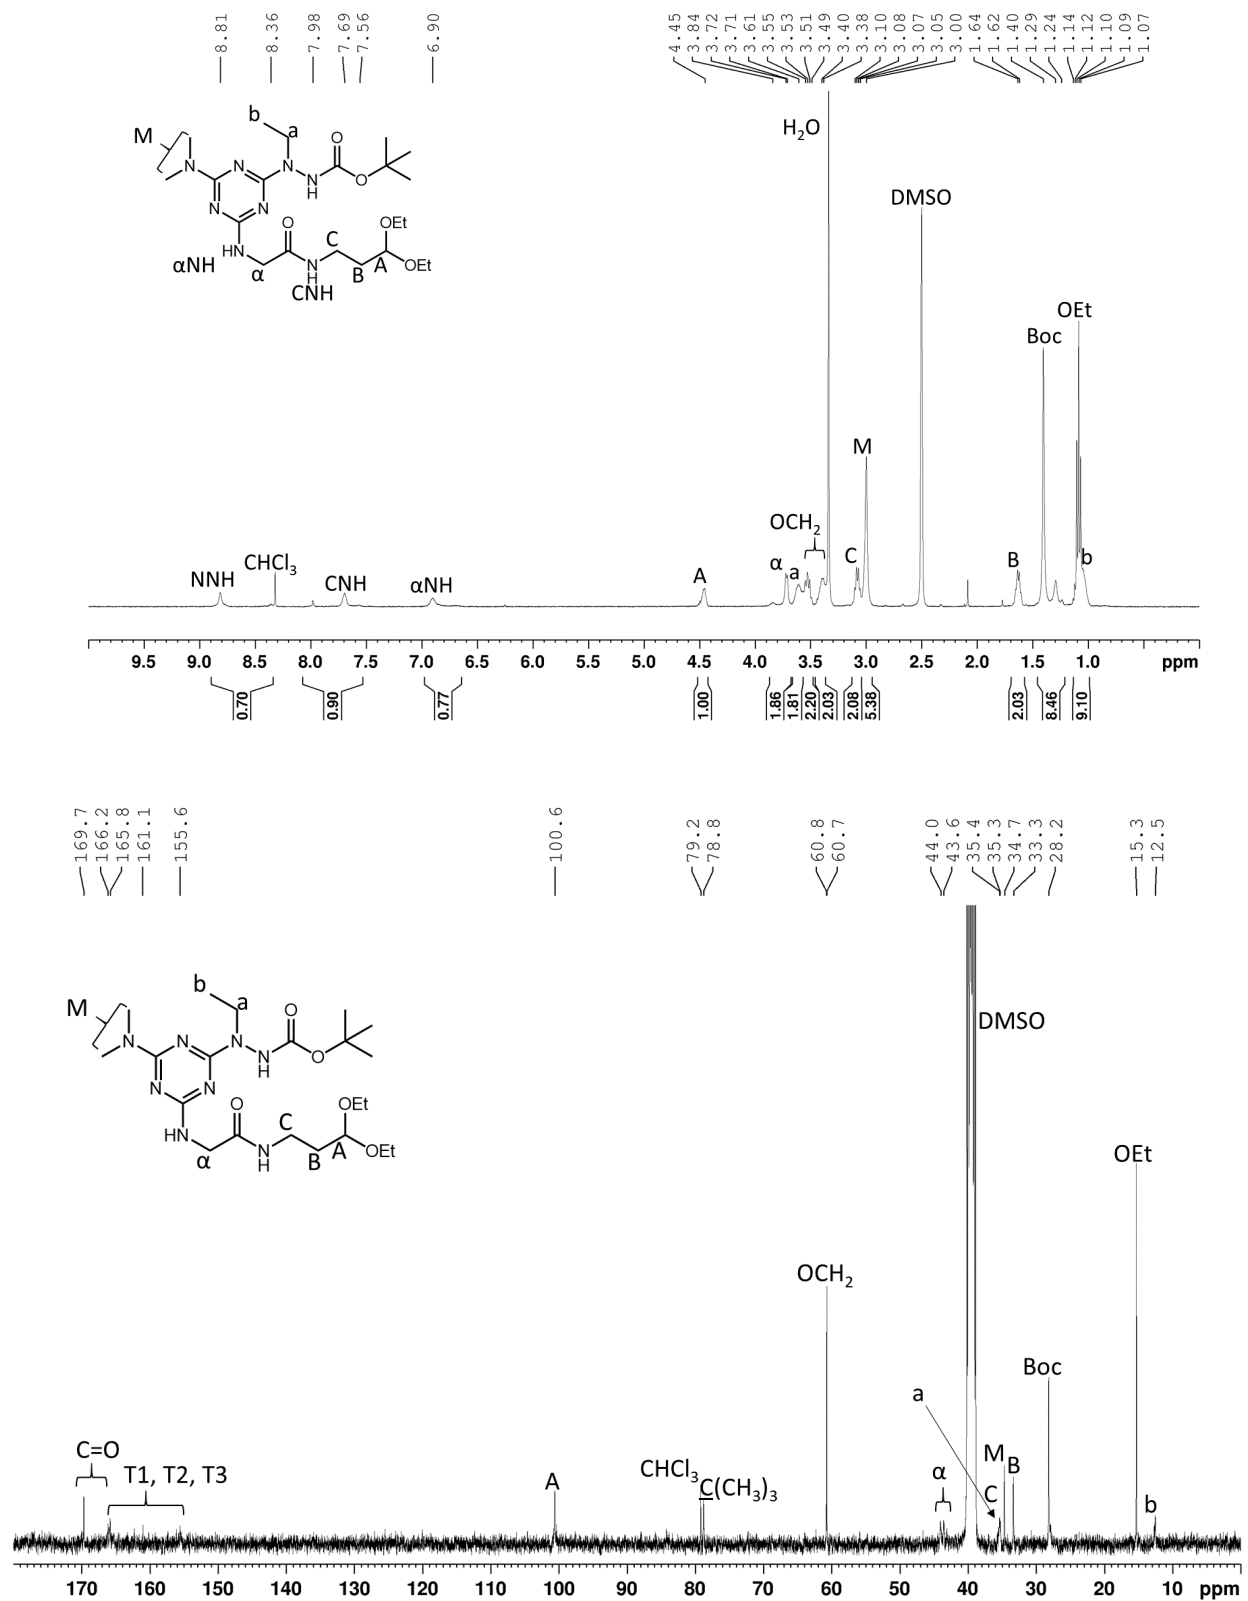

Figure S77. The 400 MHz  $^1\text{H}$  and 100 MHz  $^{13}\text{C}$  NMR Spectra of  $\text{G}^{\text{NNiPr}}$ -Monomer in DMSO.

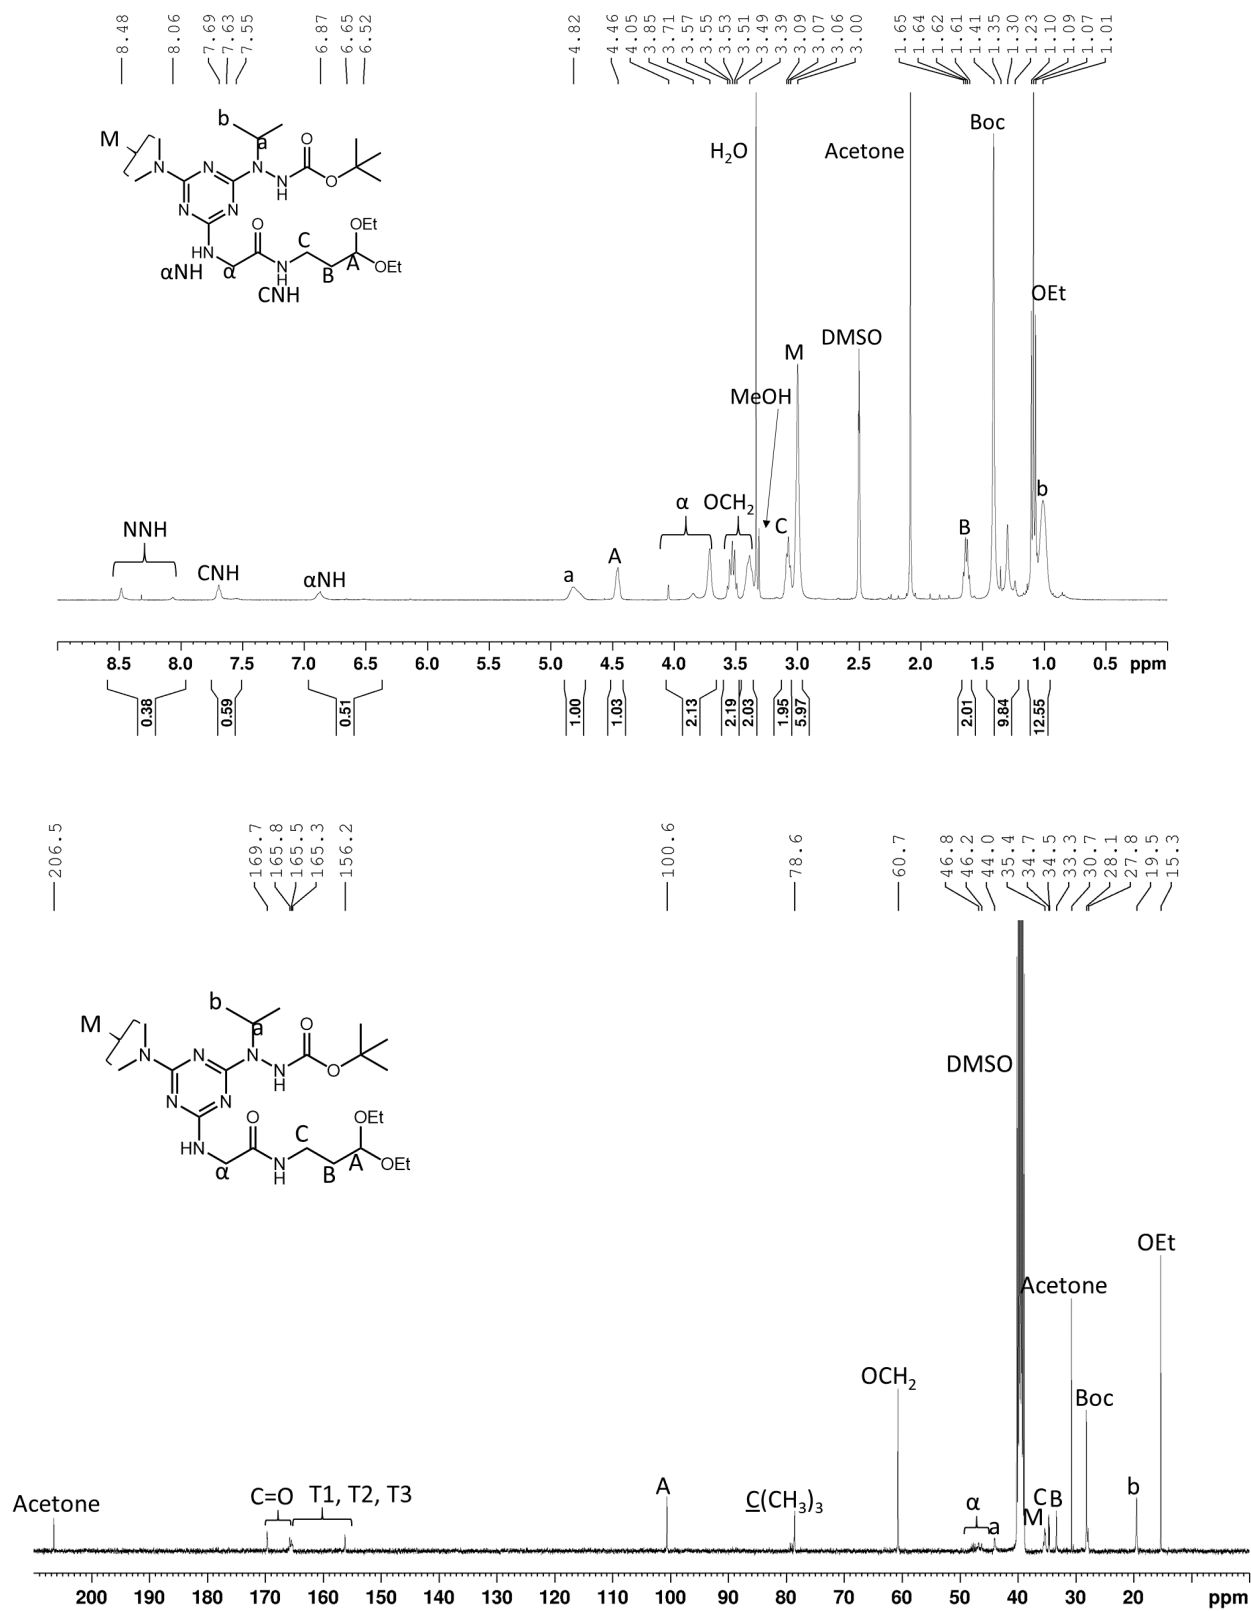



Figure S78. The 400 MHz  $^1\text{H}$  and 100 MHz  $^{13}\text{C}$  NMR Spectra of  $\text{G}^{\text{NNBn}}$ -Monomer in DMSO.

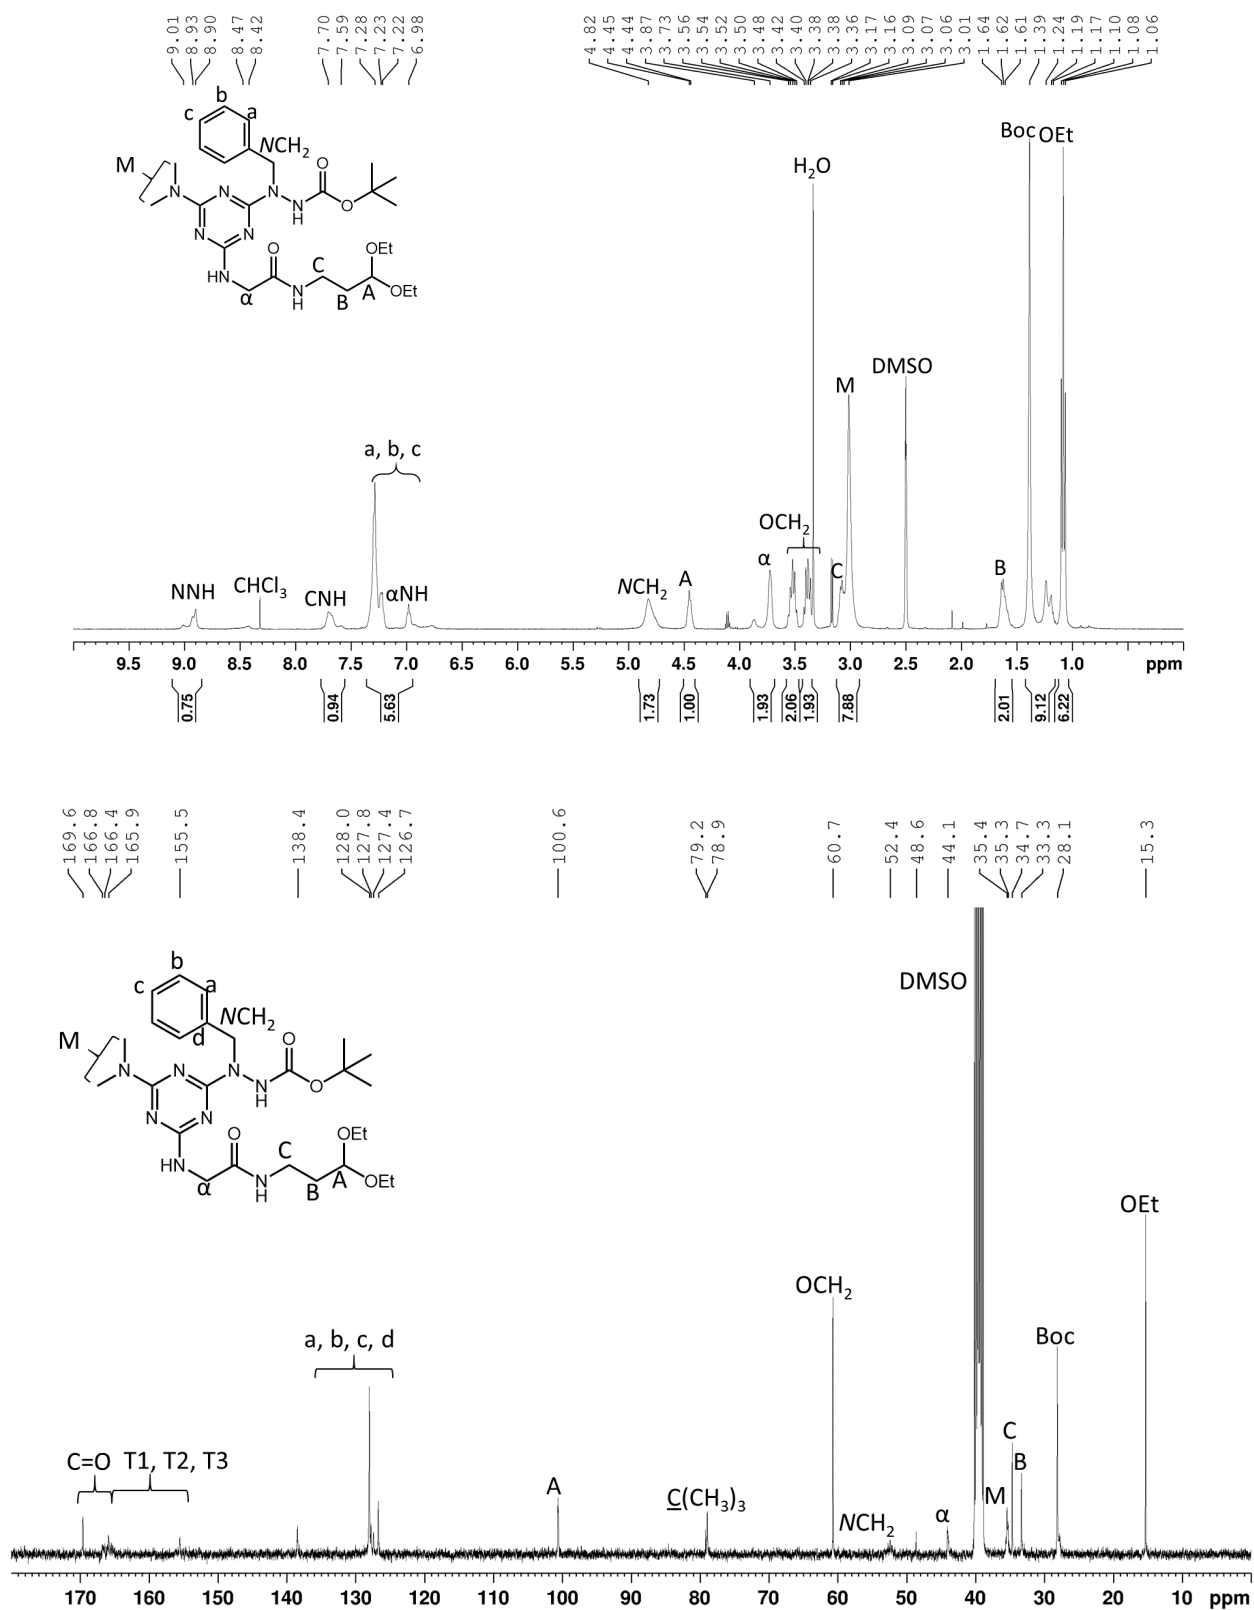

Figure S79. The 400 MHz  $^1\text{H}$  and 100 MHz  $^{13}\text{C}$  NMR Spectra of  $\text{G}^{\text{NNHx}}$ -Monomer in DMSO.

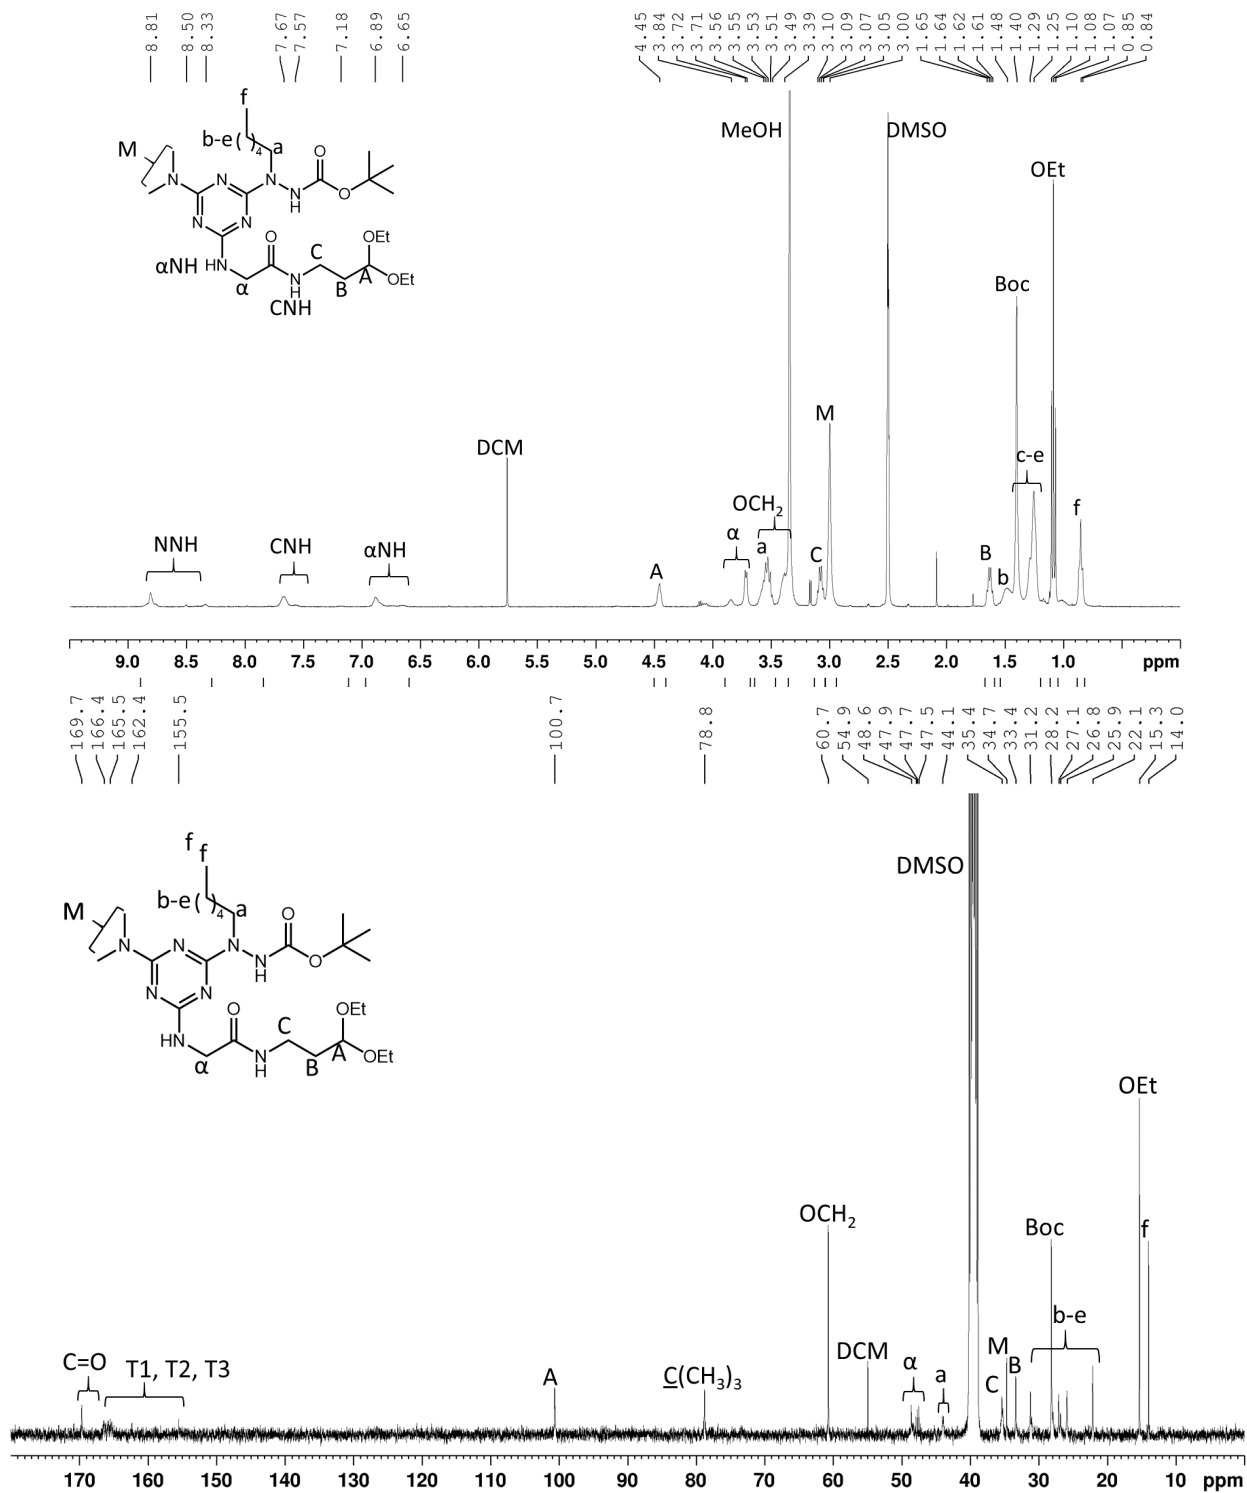

Figure S80. HRMS (ESI) of G<sup>NNMe</sup>-Monomer.

| Elmt | Val. | Min | Max | Elmt | Val. | Min | Max | Elmt | Val. | Min | Max | Use Adduct |
|------|------|-----|-----|------|------|-----|-----|------|------|-----|-----|------------|
| H    | 1    | 0   | 300 | O    | 2    | 0   | 5   | S    | 2    | 0   | 0   | H          |
| C    | 4    | 0   | 20  | F    | 1    | 0   | 0   | Cu   | 2    | 0   | 0   |            |
| N    | 3    | 0   | 8   | Si   | 4    | 0   | 0   |      |      |     |     |            |

Error Margin (ppm): 10  
 HC Ratio: unlimited  
 Max Isotopes: all  
 MSn Iso RI (%): 75.00

DBE Range: -2.0 - 1000.0  
 Apply N Rule: yes  
 Isotope RI (%): 1.00  
 MSn Logic Mode: AND

Electron Ions: both  
 Use MSn Info: no  
 Isotope Res: 10000  
 Max Results: 500

Event#: 1 MS(E+) Ret. Time : 0.113 -> 0.127 Scan# : 18 -> 20

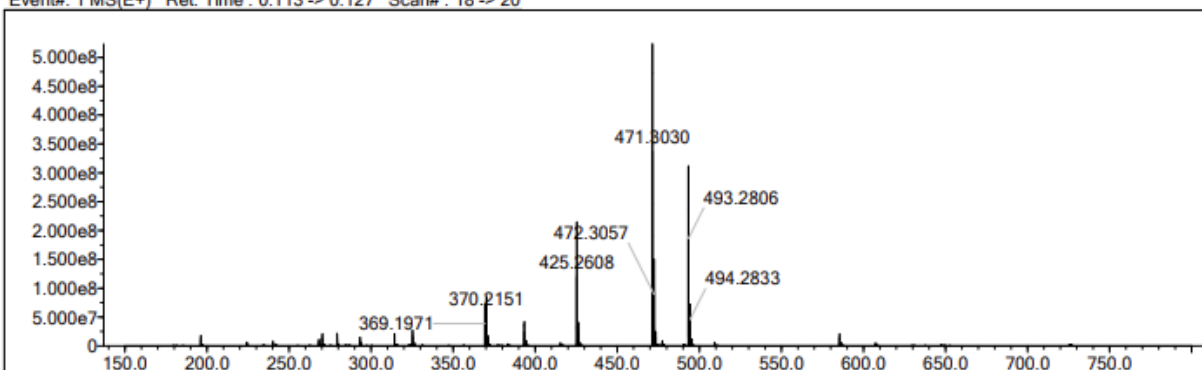

Measured region for 471.3030 m/z

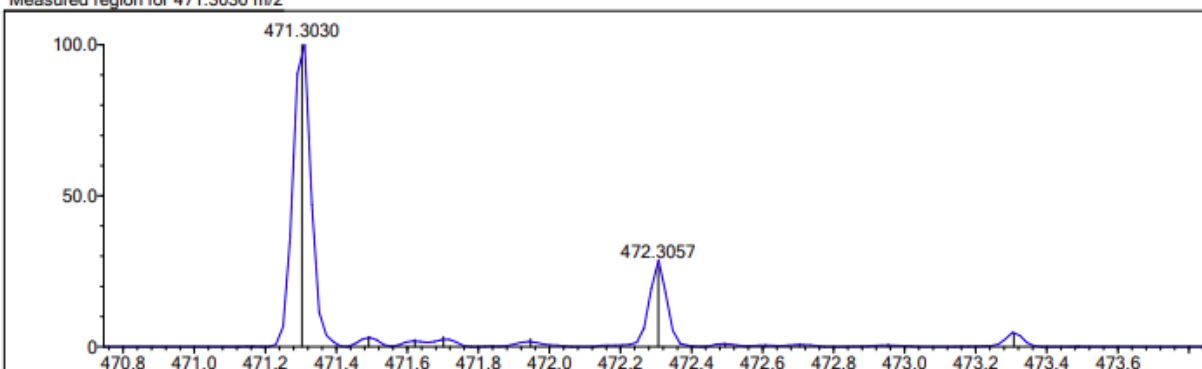

C20 H38 N8 O5 [M+H]<sup>+</sup> : Predicted region for 471.3038 m/z

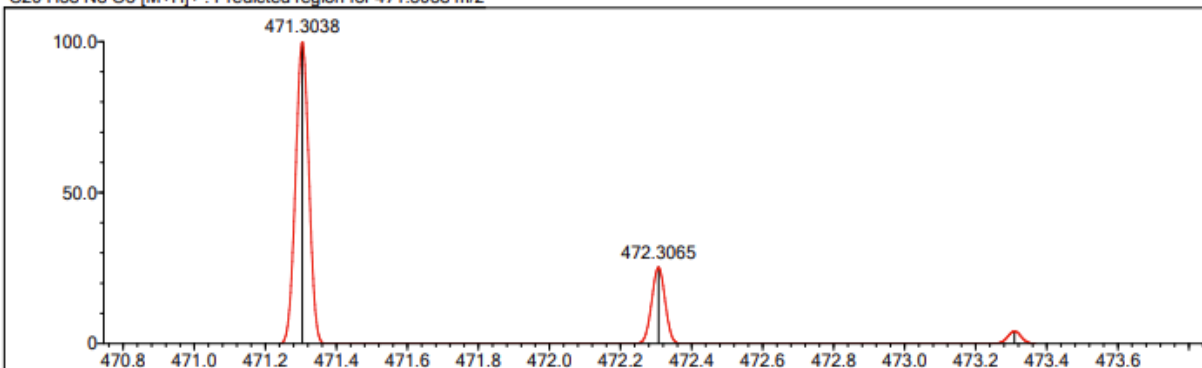

| Rank | Score | Formula (M)   | Ion                | Meas. m/z | Pred. m/z | Df. (mDa) | Df. (ppm) | Iso   | DBE |
|------|-------|---------------|--------------------|-----------|-----------|-----------|-----------|-------|-----|
| 1    | 94.04 | C20 H38 N8 O5 | [M+H] <sup>+</sup> | 471.3030  | 471.3038  | -0.8      | -1.70     | 95.71 | 6.0 |

Figure S81. HRMS (ESI) of G<sup>NNEt</sup>-Monomer.

| Elmt | Val. | Min | Max | Elmt | Val. | Min | Max | Elmt | Val. | Min | Max | Use Adduct |
|------|------|-----|-----|------|------|-----|-----|------|------|-----|-----|------------|
| H    | 1    | 0   | 300 | O    | 2    | 0   | 5   | S    | 2    | 0   | 0   | H          |
| C    | 4    | 0   | 21  | F    | 1    | 0   | 0   | Cu   | 2    | 0   | 0   |            |
| N    | 3    | 0   | 8   | Si   | 4    | 0   | 0   |      |      |     |     |            |

Error Margin (ppm): 10  
 HC Ratio: unlimited  
 Max Isotopes: all  
 MSn Iso RI (%): 75.00

DBE Range: -2.0 - 1000.0  
 Apply N Rule: yes  
 Isotope RI (%): 1.00  
 MSn Logic Mode: AND

Electron Ions: both  
 Use MSn Info: no  
 Isotope Res: 10000  
 Max Results: 500

Event#: 1 MS(E+) Ret. Time : 0.153 Scan# : 24

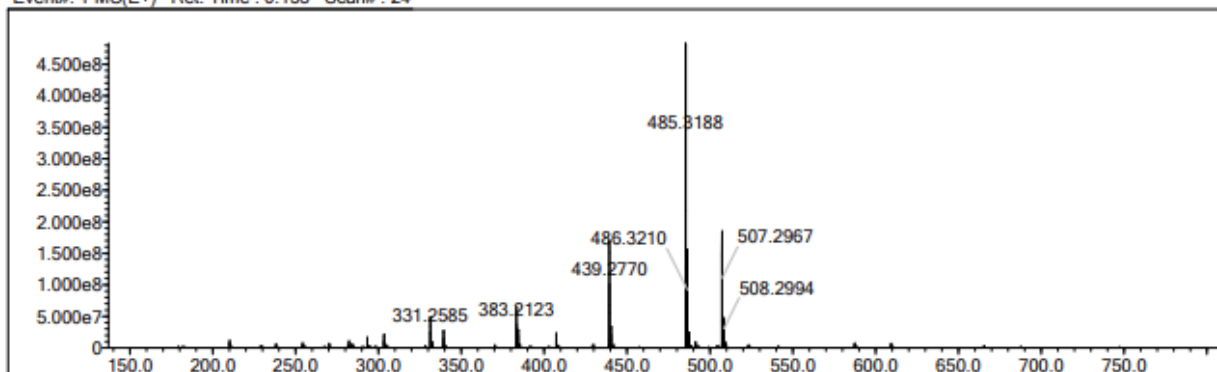

Measured region for 485.3188 m/z

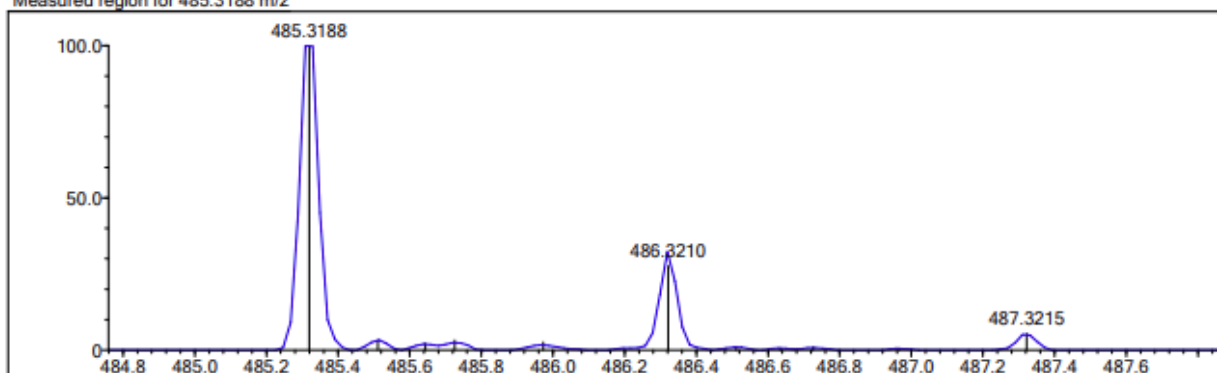

C21 H40 N8 O5 [M+H]<sup>+</sup> : Predicted region for 485.3194 m/z

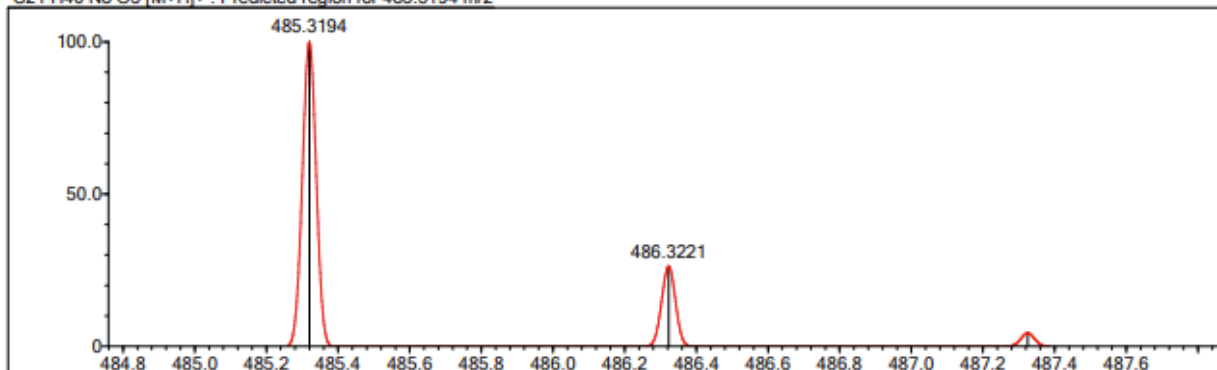

| Rank | Score | Formula (M)   | Ion                | Meas. m/z | Pred. m/z | Df. (mDa) | Df. (ppm) | Iso   | DBE |
|------|-------|---------------|--------------------|-----------|-----------|-----------|-----------|-------|-----|
| 1    | 95.12 | C21 H40 N8 O5 | [M+H] <sup>+</sup> | 485.3188  | 485.3194  | -0.6      | -1.24     | 95.69 | 6.0 |

Figure S82. HRMS (ESI) of G<sup>NNiPr</sup>-Monomer.

| Elmt | Val. | Min | Max | Elmt | Val. | Min | Max | Elmt | Val. | Min | Max | Use Adduct |
|------|------|-----|-----|------|------|-----|-----|------|------|-----|-----|------------|
| H    | 1    | 0   | 300 | O    | 2    | 0   | 5   | S    | 2    | 0   | 0   | H          |
| C    | 4    | 0   | 22  | F    | 1    | 0   | 0   | Cu   | 2    | 0   | 0   |            |
| N    | 3    | 0   | 8   | Si   | 4    | 0   | 0   |      |      |     |     |            |

Error Margin (ppm): 10  
 HC Ratio: unlimited  
 Max Isotopes: all  
 MSn Iso RI (%): 75.00

DBE Range: -2.0 - 1000.0  
 Apply N Rule: yes  
 Isotope RI (%): 1.00  
 MSn Logic Mode: AND

Electron Ions: both  
 Use MSn Info: no  
 Isotope Res: 10000  
 Max Results: 500

Event#: 1 MS(E+) Ret. Time : 0.413 Scan#: 63

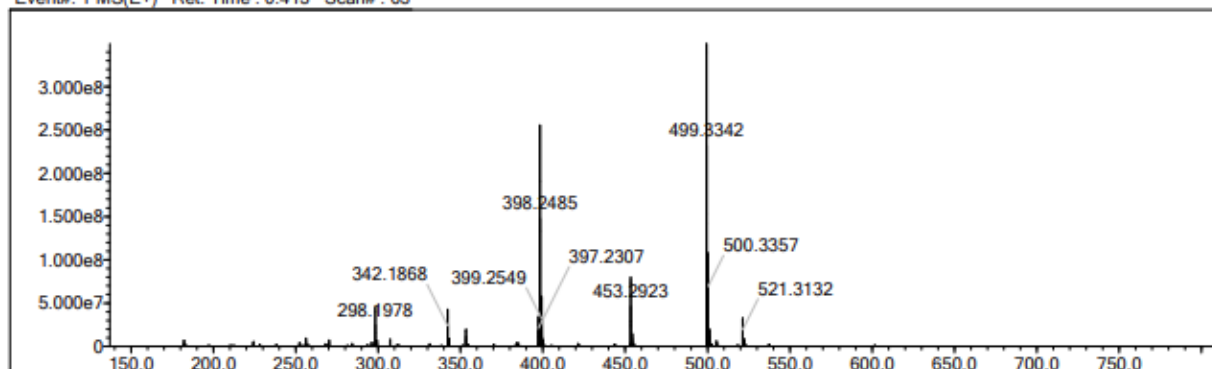

Measured region for 499.3342 m/z

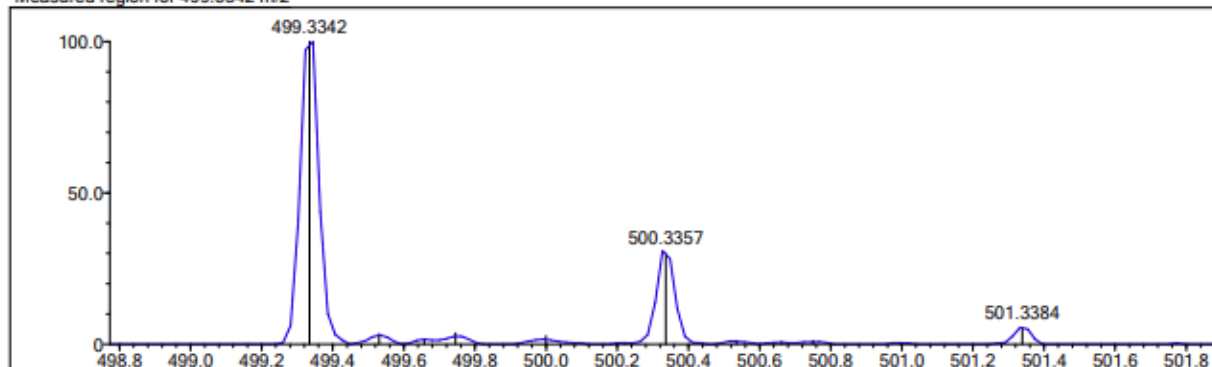

C22 H42 N8 O5 [M+H]<sup>+</sup>: Predicted region for 499.3351 m/z

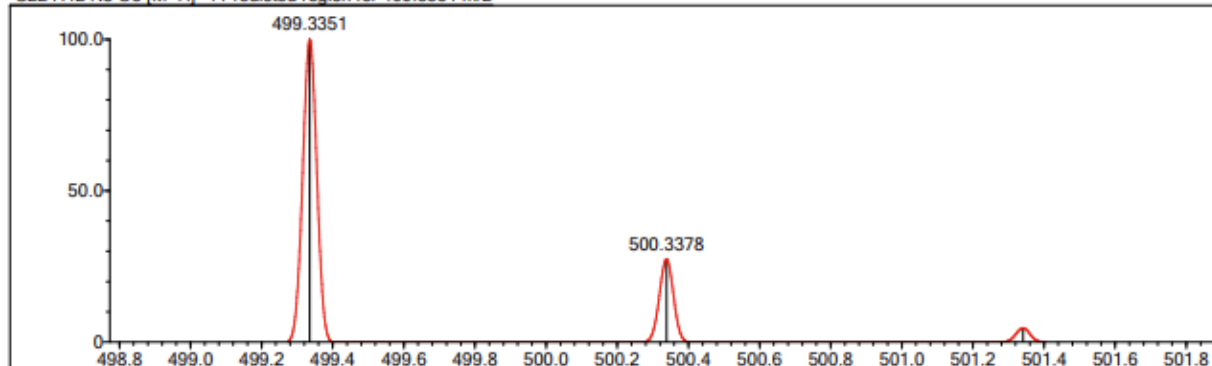

| Rank | Score | Formula (M)   | Ion                | Meas. m/z | Pred. m/z | Df. (mDa) | Df. (ppm) | Isot   | DBE |
|------|-------|---------------|--------------------|-----------|-----------|-----------|-----------|--------|-----|
| 1    | 98.00 | C22 H42 N8 O5 | [M+H] <sup>+</sup> | 499.3342  | 499.3351  | -0.9      | -1.80     | 100.00 | 6.0 |

Figure S83. HRMS (ESI) of G<sup>NN<sup>Bn</sup></sup>-Monomer.

| Elmt | Vel. | Min | Max | Elmt | Vel. | Min | Max | Elmt | Vel. | Min | Max | Use Adduct |
|------|------|-----|-----|------|------|-----|-----|------|------|-----|-----|------------|
| H    | 1    | 0   | 300 | O    | 2    | 0   | 5   | S    | 2    | 0   | 0   | H          |
| C    | 4    | 0   | 26  | F    | 1    | 0   | 0   | Cu   | 2    | 0   | 0   |            |
| N    | 3    | 0   | 8   | Si   | 4    | 0   | 0   |      |      |     |     |            |

Error Margin (ppm): 10  
 HC Ratio: unlimited  
 Max Isotopes: all  
 MSn Iso RI (%): 75.00

DBE Range: -2.0 - 1000.0  
 Apply N Rule: yes  
 Isotope RI (%): 1.00  
 MSn Logic Mode: AND

Electron Ions: both  
 Use MSn Info: no  
 Isotope Res: 10000  
 Max Results: 500

Event#: 1 MS(E+) Ret. Time : 0.440 Scan#: 67

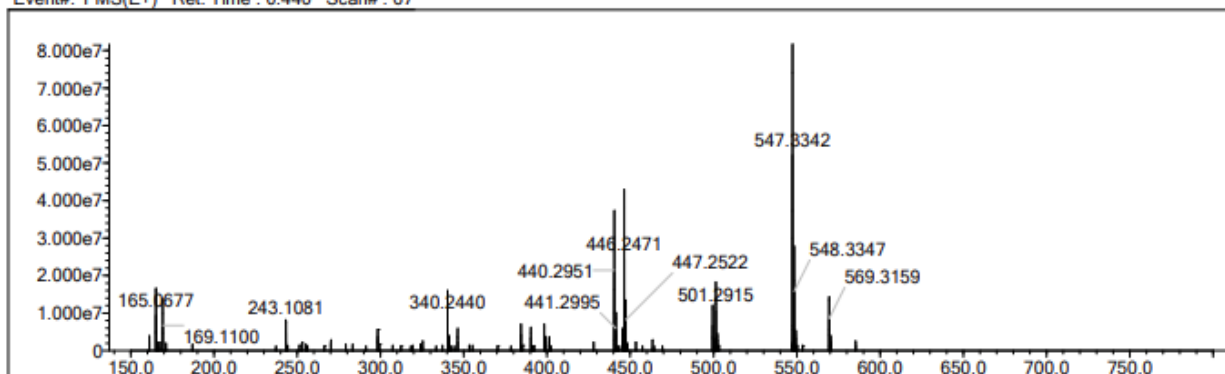

Measured region for 547.3342 m/z

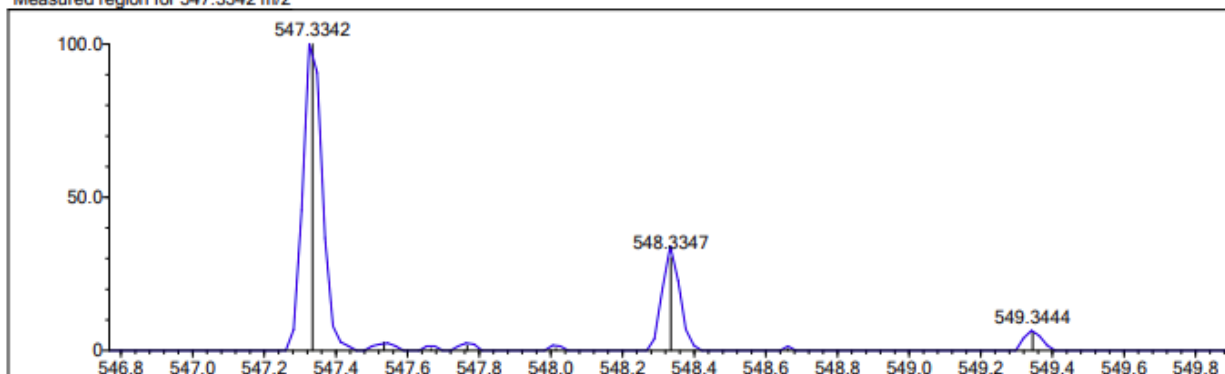

C26 H42 N8 O5 [M+H]<sup>+</sup>: Predicted region for 547.3351 m/z

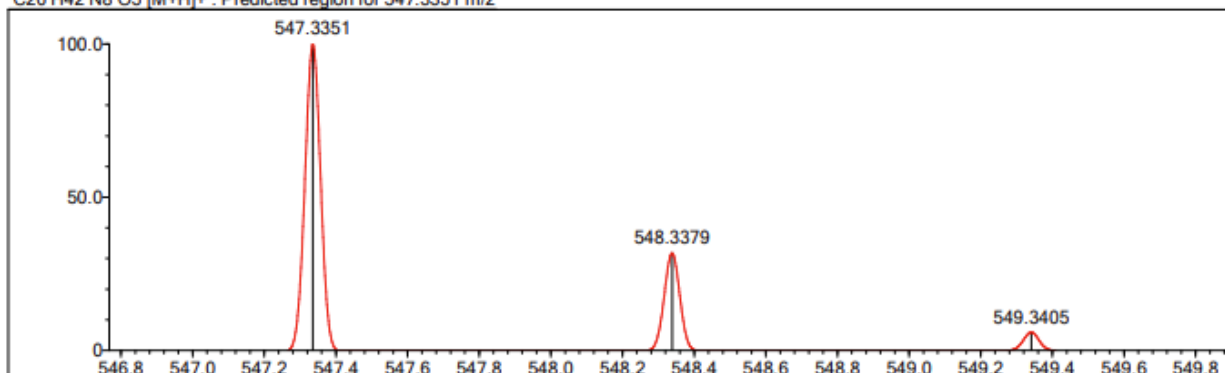

| Rank | Score | Formula (M)   | Ion                | Meas. m/z | Pred. m/z | Df. (mDa) | Df. (ppm) | Iso   | DBE  |
|------|-------|---------------|--------------------|-----------|-----------|-----------|-----------|-------|------|
| 1    | 89.72 | C26 H42 N8 O5 | [M+H] <sup>+</sup> | 547.3342  | 547.3351  | -0.9      | -1.64     | 91.18 | 10.0 |

Figure S84. HRMS (ESI) of G<sup>NNHx</sup>-Monomer.

| Elmt | Val. | Min | Max | Use Adduct |
|------|------|-----|-----|------|------|-----|-----|------|------|-----|-----|------|------|-----|-----|------------|
| H    | 1    | 0   | 100 | O    | 2    | 0   | 5   | Si   | 4    | 0   | 0   | Cl   | 1    | 0   | 0   | H          |
| C    | 4    | 25  | 25  | F    | 1    | 0   | 0   | P    | 3    | 0   | 0   | Cu   | 2    | 0   | 0   |            |
| N    | 3    | 0   | 8   | Na   | 1    | 0   | 0   | S    | 2    | 0   | 0   | Br   | 1    | 0   | 0   |            |

Error Margin (ppm): 50  
 HC Ratio: unlimited  
 Max Isotopes: all  
 MSn Iso RI (%): 75.00

DBE Range: -2.0 - 1000.0  
 Apply N Rule: yes  
 Isotope RI (%): 1.00  
 MSn Logic Mode: AND

Electron Ions: both  
 Use MSn Info: no  
 Isotope Res: 10000  
 Max Results: 500

Event#: 1 MS(E+) Ret. Time : 0.317 Scan#: 39

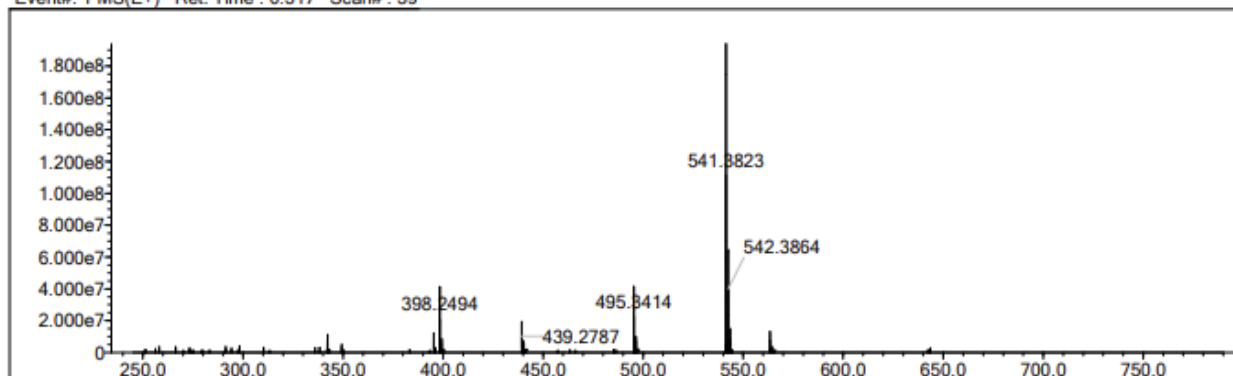

Measured region for 541.3823 m/z

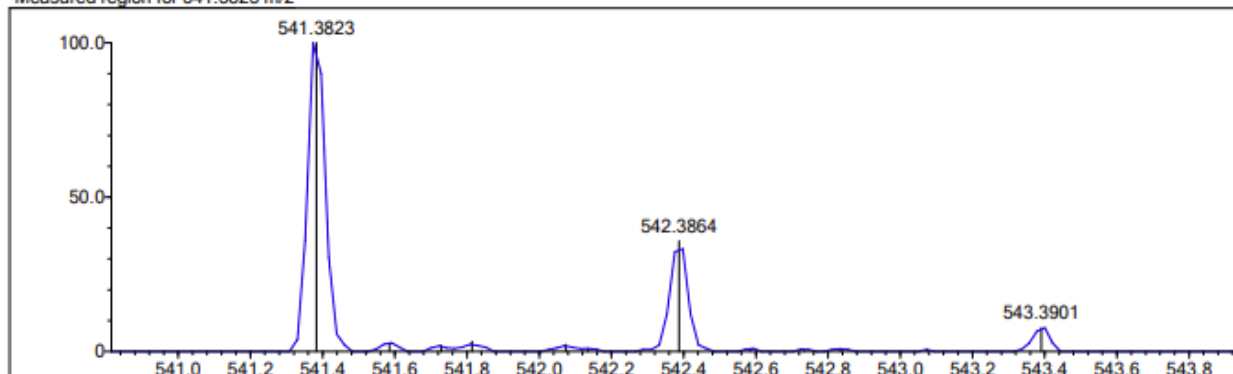

C25 H48 N8 O5 [M+H]<sup>+</sup> : Predicted region for 541.3820 m/z

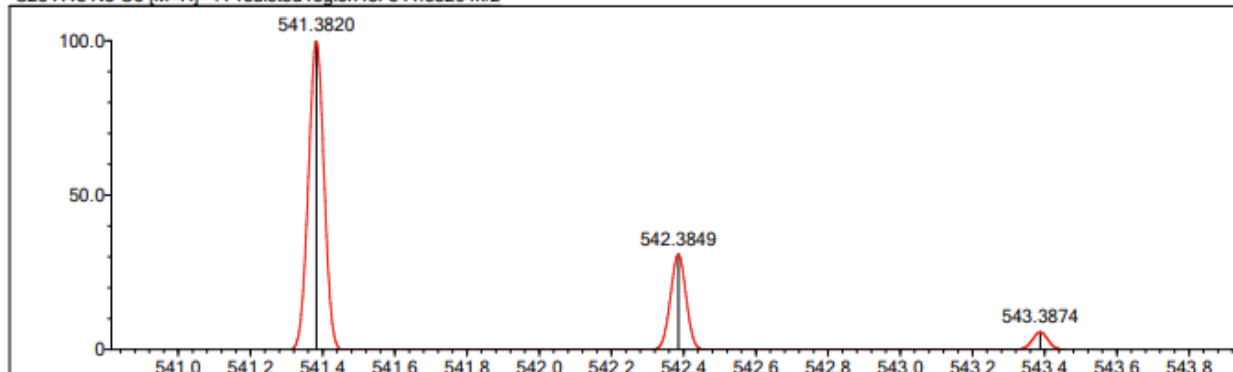

| Rank | Score | Formula (M)   | Ion                | Meas. m/z | Pred. m/z | Df. (mDa) | Df. (ppm) | Isot  | DBE |
|------|-------|---------------|--------------------|-----------|-----------|-----------|-----------|-------|-----|
| 1    | 93.19 | C25 H48 N8 O5 | [M+H] <sup>+</sup> | 541.3823  | 541.3820  | 0.3       | 0.55      | 93.19 | 6.0 |

## References

- A) Yang, Y.-F.; Yu, P.; Houk, K. N. Computational Exploration of Concerted and Zwitterionic Mechanisms of Diels-Alder Reactions between 1,2,3-Triazines and Enamines and Acceleration by Hydrogen-Bonding Solvents. *J. Am. Chem. Soc.* **2017**, *139* (50), 18213-18221.
- B) Grimme, S.; Antony, J.; Ehrlich, S.; Krieg, H. A consistent and accurate *ab initio* parametrization of density functional dispersion correction (DFT-D) for the 94 elements H-Pu. *J. Chem. Phys.* **2010**, *132* (15), 154104
- C) Melendez, R. E.; Lubell, W. D. Aza-Amino Acid Scan for Rapid Identification of Secondary Structure Based on the Application of *N*-Boc-Aza<sup>1</sup>-Dipeptides in Peptide Synthesis. *J. Am. Chem. Soc.* **2004**, *126* (21), 6759-6764.
- D) Casanova, B. B.; Muniz, M. N.; de Oliveira, T.; de Oliveira, L. F.; Machado, M. M.; Fuentefria, A. M.; Gosmann, G.; Gnoatto, S. C. B. Synthesis and Biological Evaluation of Hydrazone Derivatives as Antifungal Agents. *Molecules.* **2004**, *20*, 9229-9241.
- E) Škopić, M. K.; Willems, S.; Wagner, B.; Schieven, J.; Krause, N.; Brunschweiler, A. Exploration of a Au(I)-mediated three-component reaction for the synthesis of DNA-tagged highly substituted spiroheterocycles. *Org. Biomol. Chem.* **2017**, *15*, 8648-8654.
